# Supplementary material
Source: Atypon-hosted journal article supplement (https://mlc.tdslib.org/Record/157811/DownloadSupplementalFile?fileId=12)
Supplement: DownloadSupplementalFile [file DownloadSupplementalFile]

An Index  
to  
***The Lutheran School Bulletin***  
(November 1930 – May 1960)

***The Lutheran Educator***  
(October 1960 – Spring 2007)

***Partners in Christian Education***  
(Summer 1989 – Winter 1991)

***Parish Leadership***  
(Summer 1992–Summer 1995)

***Lutheran Leader***  
(Fall 1995–Winter 2005)

***Christian Parent***  
(Summer 1992–Summer 1995)

***Lutheran Parent***  
(Fall 1995–July/August 2004)

***ELS Teacher***  
(Fall 1997–2001)

BY  
Author and Subject

## Index

### *The Lutheran Educator (The Lutheran School Bulletin); Lutheran Leader (Partners in Christian Education, Parish Leadership); Lutheran Parent (Christian Parent); ELS Teacher*

*The Lutheran School Bulletin* and *The Lutheran Educator* are essentially the same journal. Their audiences and purposes were identical. *The Lutheran School Bulletin* was first published by the Minnesota District of the Wisconsin Synod. It appeared in 1930 with Herbert Sitz as editor. In 1934 the publication was taken over by the School Board of the Ev. Lutheran Joint Synod of Wisconsin a.o.s., the predecessor of the present Commission on Parish Schools. Herbert Sitz continued as the editor. In 1936 F. W. Meyer was called as the first executive secretary of the General School Committee (as it was then called) and he assumed the responsibility as editor of *TLSB*. He served as editor until his death in 1948. Emil Trettin was called as executive secretary in 1949 and became the editor.

In May 1960 *The Lutheran School Bulletin* ceased publication and in October 1960 *The Lutheran Educator* appeared with Adolph Fehlauer, the assistant executive secretary of the Board of Education, as the editor. Mr. Fehlauer continued as editor until 1976 when the new executive secretary, Donald Zimmerman, became editor. Until 1986 subscriptions to *The Lutheran Educator* were part of the dues paid at the district teacher's conferences. Since that time, subscriptions have been voluntary. In 1987 the synod resolved to turn over the responsibility of editing *The Lutheran Educator* to Dr. Martin Luther College. In 1995 Dr. Martin Luther College was amalgamated with Northwestern College with the new college called Martin Luther College. Since then *The Lutheran Educator* is edited by the faculty of Martin Luther College. John Isch served as editor from 1987 to 2004. Jack Minch is the current editor.

*Partners in Christian Education* began in the summer of 1989. It was edited by Pastor William Fischer, a staff member of the Board for Parish Education (Board for Parish Services) and was written for the part-time educational agencies of the church. It ceased publication in 1991 when a new publication, *Parish Leadership*, replaced it. Its latest transformation is *Lutheran Leader*. Pastor Wayne Mueller, Administrator for Parish Services, edited the journal until 2001. Pastor Bruce Becker took over as editor at that time. The journal ceased publication in the winter of 2005.

*Christian Parent*, a journal for families, began in 1992; it became *Lutheran Parent* in 1995. *Lutheran Parent* ceased publication in 2004. The editor was Kenn Kremer. The *ELS Teacher* began publication in the fall of 1997. It is the educational journal of the Evangelical Lutheran Synod.

This index includes all journals. *The Lutheran School Bulletin* begins with volume 1, number 1, October 1930 and ends with volume 30, number 4, May 1960. *The Lutheran Educator* begins with volume 1, number 1, September 1960. *Partners in Christian Education* begins with volume 1, number 1, Summer 1989 and ends with volume 3, number 2, Fall 1991. *Parish Leadership* begins with volume 1, number 1, Summer 1992 and ends with volume 13, number 2, winter 2005. *Lutheran Parent (Christian Parent)* began with volume 1, number 1, Summer 1992 and ended with volume 11, number 6, July/August 2004. All of these journals are or were published four or six (*Lutheran Parent*) times a year. *The Lutheran Educator* and *The Lutheran School Bulletin* include October, December, February, and May. Some issues of *The Lutheran School Bulletin* before 1934 were not published. The missing issues are volume 1, number 4, spring 1931; volume 3, number 4, spring 1933; and volume 4, number 4, spring 1934. *Partners in Christian Education* was published in summer, fall, winter, and spring. *Parish Leadership* is published four times a year in fall, winter, spring, and summer.

Some decisions had to be made concerning what to include in this index. Announcements, notices, or advertisements which appeared in the four journals are not included except when a notice seemed to have historical value. Obituaries are included. *TLE* and *TLSE* regularly published brief inspirational messages. These have been included under the author's name and under the descriptor **meditation**. In a few instances where the inspirational message was longer or was a published sermon, it is also indexed under other descriptors which indicate its contents.

Book reviews are listed under the author's name, under the descriptor **book review**, and occasionally under another descriptor which indicates the subject of the review. Reviews of elementary school textbooks, reviews of music which are listing of titles, or brief reviews are not included in this index. *The Lutheran School Bulletin* regularly contained information regarding graduate assignments, calls, new schools, and additions to existing schools. These notices are not included in this index. School statistics and elementary school test results, another regular feature of *TLSE* are, however, included.

There are two parts to this index: author listing and descriptor listing. The first listing is by author in alphabetical order. In the few instances where there are joint authors, there is a separate listing for each author. The second section contains the listing by descriptors. Each entry in the index has a potential of three descriptors, although most entries are listed under only one or two descriptors. There are 124 descriptors used in this index. The list of descriptors is found on the page preceding the descriptor index. The list is a result of a trial-and-error procedure but the descriptors do identify types of articles. Some descriptors are more general or broader; others are specific to a single topic. The list of descriptors also contains a brief explanation.

John Isch, em.  
Martin Luther College  
New Ulm, Minnesota  
1/2/08

© John Isch 2008

# Author Index

- Aaberg, Marie. "A Teacher's Trip to Washington." (*ELS*) I-3:5 Su98
- Aaberg, Theodore. Seeling the School. (*ELS*). VI: 4-5 Fa99.
- A.W. (tran. by William Sc. "One Hundred Years Ago." (*TLE*) XVI-3: 2-4. F76
- Aderman, James. "Don't Rob Them of the Privilege." (*PCE*) I-2: 22-23. Fa89
- . "Bible Study: Planning Ahead." (*PCE*) II-1: 4-5. Su90
- . "Video Game Bytes." (*LP*) III-2: 4. Nov/Dec 95
- . "Cultivating a Broader View." (*LP*) III-3: 6. Jan/Feb 96
- . "Shout for Joy and Sing." (*TLE*) XXI-1: 24. O80
- . "Hooked on Porn." (*LP*) V-1:10-11. Sep/Oct 1997
- . "The Ceremony." (*LP*) V-3:12-13. Jan/Feb 1998
- . "Spell it Baptissm." (*LP*) V-5:5. May/June 1998
- . "Self-Talk About Drug-Talk." (*LP*) VI-4: 5f March/April99
- . "Do You Really Know Me?" (*LP*). VII-4:11 Mar/Apr00
- . "Parents are Instructors." (*LL*). IX-1: 26-27 Fa(LL)00
- . "Living Bold." (*LL*) X-3:20-21 Sp02
- . "Have the Talk." (*LP*) XI-4: 4-8 Mar/Apr04.
- Adickes, David. "Double or Nothing." (*TLE*) XVI-4: 20-22. My76
- Adickes, Robert. "Creation Science Field Trip to the Grand Canyon, A." (*TLE*) XVI-3: 22-24. F76
- Adickes, Robert + Meier. "Make Every Effort to Keep the Unity (Eph 4:3)." (*TLE*) XXIV-2: 12-13. D83
- Advisory Committee on Education. "Governmental Aid to Education." (*TLE*) VIII-1: 13-20. O67
- Ahlswede, Eugene. "God Bless our Native Land." (*TLE*) XXI-1: 2-4. O80
- . "Do They Know?" (*TLE*) XXI-2: 2-4. D80
- . "So You've Received a Call." (*TLE*) XXI-3: 2-4. F81
- . "Don't Be Weird." (*TLE*) XXI-4: 2-4. My81
- . "What Did You Do On Your Vacation?" (*TLE*) XXII-1: 2-4. O81
- . "Co-operation." (*TLE*) XXII-2: 2-4. D81
- . "The Relationship of Pastor and Teacher." (*TLE*) XXII-4: 2-4. My82
- . "A Birthday Worth Remembering." (*TLE*) XXIII-1: 2-3. O82
- . "Luther's Commitment to Christian Education." (*TLE*) XXIII-1: 3-5. O82
- . "How About a Family Bible School." (*TLE*) XXIII-2: 11-13. D82
- . "Apple and the Rod, The." (*TLE*) XXIII-2: 4-5. D82
- . "Luther's Love for Children." (*TLE*) XXIII-3: 2-5. F83
- . "The Large Catechism of Dr. Martin Luther." (*TLE*) XXIV-1: 2-4. O83
- . "Planning." (*TLE*) XXIV-3: 15. F84
- . "How Well Do You Take Criticism?" (*TLE*) XXIV-3: 16. F84
- . "Resist Beginnings." (*TLE*) XXIV-3: 17. F84
- . "Twelve Month Call, The." (*TLE*) XXIV-4: 2-4. My84
- . "Resignations." (*TLE*) XXV-1: 10-12. O84
- . "Happy Birthday, DMLC." (*TLE*) XXV-2: 6. D84
- . "Let's Not Be Impatient." (*TLE*) XXV-4: 10-12. My85
- . "I Don't Laugh at Drunks Any More." (*TLE*) XXV-4: 9-10. My85
- . "Parent-Pastor Consultation." (*TLE*) XXVI-1: 7-8. O85
- . "Humanist Manifesto II." (*TLE*) XXVI-2: 8-9. D85
- . "A Bouquet for My Lord." (*TLE*) XXVI-2: 9-10. D85
- . "Garbage In—Garbage Out." (*TLE*) XXVI-3: 14-15. F86
- . "To Canada." (*TLE*) XXVI-3: 21-22. F86
- . "Prayer Power." (*TLE*) XXVII-1: 1. O86
- . "Sexual Abuse of Children, The." (*TLE*) XXVII-2: 1-2. D86
- . "Sing, Christian, Sing." (*TLE*) XXVII-3: 1-2. F87
- . "Ignorance Is No Sin." (*TLE*) XXVII-3: 2-3. F87
- . "Let's Talk About Salary." (*TLE*) XXVIII-4: 18-21. O87
- Albrecht, Carol. "The Christmas Challenge: A gift of Love." (*LP*) IX-2: 10-11 Nov/Dec 01
- . "The Missing Link." (*LP*) IX-5: 9-12 Ma/Ju 02
- . "Noni's Christmas Joy." (*LP*) X-2: 4-5 Nov/Dec02.
- Albrecht, Martin. "Attention—Organists!" (*TLE*) I-1: 14-15. O60
- . "Are You a Choir Director?" (*TLE*) I-3: 16-18. F61
- . "What is Happening to Our School Music Course?" (*TLE*) II-1: 12-14. O61
- . "Choosing Proper Church Music." (*TLE*) II-2: 14-16. D61
- . "Choosing Proper Organ Music For the Church Service." (*TLE*) II-3: 13-15. F62
- . "Choosing Proper Choir Music for the Church Service." (*TLE*) II-4: 16-18. My62
- . "Becoming Acquainted With the Church Year." (*TLE*) III-1: 16-18. O62
- . "Appropriate Music for the Marriage Service." (*TLE*) III-4: 18-19. My63
- . "Spinnet Organ, The." (*TLE*) IV-1: 14-15. O63
- . "Is There Too Much Modern Music in Our Churches?" (*TLE*) IV-1: 16-17. O63
- . "Our 'Non-Lutheran' Hymns." (*TLE*) IV-2: 18-20. D63
- . "Our Liturgy a Living Thing?" (*TLE*) IV-3: 15-176. F64
- . "The Christian Teacher and the Parents." (*TLE*) IV-4: 7-9. My64
- . "No, We Do Not Have to Lose Our Lutheran Chorale." (*TLE*) IX-1: 21-23. O68
- . "How May The Interest of Choir Members in ... Be Encouraged." (*LSB*) IX-3: 3-5. F39
- . "What Are We Doing to Improve Ourselves?" (*TLE*) V-1: 21-23. O64
- . "Psalter—Hymnbook and Prayer Book, The." (*TLE*) VI-1: 19-21. O65

- . "How Luther's Doctrine is Depicted in His Hymns (1)." (*TLE*) VI-2: 20-22. D65
- . "How Luther's Doctrine is Depicted in His Hymns (2)." (*TLE*) VI-3: 16-18. F66
- . "Home and the Confirmation Class, The." (*TLE*) VI-4: 13-15. My66
- . "How Luther's Doctrine is Depicted in His Hymns (3)." (*TLE*) VII-1: 22-24. O66
- . "Do You Appreciate and Understand Your Church Service?" (*TLE*) VII-3: 16-18. F67
- . "Teaching Children to Appreciate Luther's Hymns." (*TLE*) VII-4: 14-16. My67
- . "Music—a Gift of God?" (*TLE*) VIII-2: 16-18. D67
- . "How Well are My School Children Singing?" (*TLE*) VIII-3: 20-22. F68
- . "Music Interests and Aptitude of the Child." (*TLE*) VIII-4: 18-20. My68
- . "Have You Started Your Choir?" (*TLE*) X-2: 19-21. D69
- . "Challenge to the Church Organist, A." (*TLE*) X-3: 19-21. F70
- . "What is Proper Church Music?" (*TLE*) X-4: 15-17. My70
- . "Matins and Vespers." (*TLE*) XI-1: 21-23. O70
- . "About Church Musicianship." (*TLE*) XII-1: 18-20. O71
- . "Is Your Music Improving?" (*TLE*) XII-2: 20-22. D71
- . "Should Our Worship Service Remain As It Is?" (*TLE*) XII-3: 20-22. F72
- . "Uniformity in the Playing of Our Hymns." (*TLE*) XIII-1: 20-22. O72
- . "Are We Acting Wisely in Our Wedding Practices?" (*TLE*) XIII-2: 19-21. D72
- . "TACT." (*TLE*) XIII-3: 22-24. F73
- . "Musical Instruments in the Church." (*TLE*) XIV-2: 20-22. D73
- . "Praise God From Whom All Blessings Flow." (*TLE*) XIV-3: 10-12. F74
- . "Lutheran Composers." (*LSB*) XIX-1: 4. O48
- . "Lutheran Composers (19th Century)." (*LSB*) XIX-3: 6-7. F49
- . "To What Extent Can ... Church Modes Be Recognized in Chorale." (*LSB*) XV-1: 3. O44
- . "Musicians of the Lutheran Church." (*LSB*) XVII-3: 4-5. F47
- . "Lutheran Composers of the 17th Century." (*LSB*) XVIII-1: 5-6. O47
- . "Lutheran Composers of the 17th Century." (*LSB*) XVIII-3: 7. F48
- . "Lutheran Composers (19th-20th Century)." (*LSB*) XX-1: 4. O49
- . "Our Hymnological Heritage." (*TLE*) XXIII-4: 19-21. My83
- Albrecht, Michael. "A Christian Philosophy of Discipline." (*TLE*) XXVIII-1: 3-4. O87
- . "Twenty-six Muscles." (LP) X-3: 6-8 Ja/Fe 03.
- Albrecht, R.M. "Book Chat." (*LSB*) I-1: 5-6. N30
- . "The Fifth Commandment (1)." (*LSB*) I-2: 2. n.d.30
- . "Der Deutsche Leseunterricht." (*LSB*) I-2: 2. n.d.30
- . "The Fifth Commandment (2)." (*LSB*) I-3: 2. n.d.31
- . "Was Soll Man in Den Deutschen Sprechubungen Treiben?" (*LSB*) I-3: 3-4. n.d.31
- . "Book Chat." (*LSB*) I-3: 4-5. n.d.31
- . "The First Commandment (1)." (*LSB*) II-1: 2-3. S31
- . "The First Commandment (2)." (*LSB*) II-2: 2. N31
- . "The First Commandment (3)." (*LSB*) II-4: 6. Mr32
- . "The Second Commandment (1)." (*LSB*) III-2: 2-4. N32
- . "The Second Commandment (2)." (*LSB*) III-3: 2-3. F33
- . "Book Chat." (*LSB*) III-3: 5. F33
- . "Book Chat." (*LSB*) III-3: 6. F33
- . "The Third Commandment (1)." (*LSB*) IV-3: 5-6. Ap34
- . "The Third Commandment (2)." (*LSB*) V-1: 5-6. S34
- . "The Fourth Commandment (1)." (*LSB*) V-2: 4. N34
- . "The Fourth Commandment (2)." (*LSB*) V-3: 4. Ja35
- . "The Sixth Commandment." (*LSB*) VI-1: 5-6. O35
- . "The Seventh Commandment." (*LSB*) VI-3: 7-8. F36
- . "The Eighth Commandment." (*LSB*) VI-4: 5-6. Ap36
- . "The Birth of Moses in a Time of Distress." (*LSB*) VII-2: 5-6. D36
- . "Moses Called to Lead Israel." (*LSB*) VII-3: 5-6. F37
- . "The Plagues." (*LSB*) VII-4: 4-5. My37
- . "What Can the Teacher Do ... Indifferent Attitude ... School." (*LSB*) XVIII-2: 3-5. D47
- . "Catechisation on 'Christ's Descent Into Hell'." (*LSB*) XXII-3: 1-3. F52
- Anderson, Ames. "Service Playing: The Hymn Intonation." (*TLE*) XVI-1: 14-17. O75
- Anderson, Einar. "Is the Establish of the Ninth-Year Junior High Feasible ...?" (*LSB*) XIX-1: 4-7. O48
- Anderson, Robert. "Celebrate Earth Day." (LP) III-4: 4-5. Mar/Apr 96
- Alfred, Carolee. "A New Endeavor." (*TLE*). XLV-1: 24-25. O04.
- Angle, Kay. "Relationships: The Teacher and the Child." (PL) II-2: 8-9 Sp94
- . "The Teacher and the Child." (PCE) III-2: 26-27. Fa91
- Anonymous. "Foreword." (*LSB*) I-1: 1. N30
- . "School Statistics." (*TLE*) I-2: 20-23. D60
- . "Our New Testing Program." (*TLE*) I-2: 24. D60
- . "The Advent Wreath." (PL) I-3: 20-21 Su93
- . "Protestant Elementary Schools." (*TLE*) I-3: 22-23. F61
- . "Dorthea Gamm." (*TLE*) I-3: 24. F61
- . "Pastor John Plocher." (*TLE*) I-3: 24. F61
- . "Sunday School Superintendent." (PCE) I-3: 41. Wi89
- . "Test Supplement: Book Report on 'The Christmas Carol'." (*LSB*) I-3: 6. n.d.31
- . "Guidelines Relative to the Listing of Certified Teachers...." (*TLE*) I-4: 21-22. My61
- . "William Hellermann." (*TLE*) I-4: 24. My61
- . "The Curriculum in Religion." (*TLE*) II-1: 21. O61
- . "Proposed Objective Test on Europe." (*LSB*) II-1: 8.

- S31
- “School Enrollments.” (*TLE*) II-2: 22-23. D61
  - “Cooperation and Order.” (*TLE*) II-3: 21. F62
  - “Book Chat.” (*LSB*) II-3: 5. J32
  - “Sacrifice.” (*LSB*) II-4: 1. Mr32
  - “Charles Brenner.” (*TLE*) II-4: 24. My62
  - “Henry Meyer.” (*TLE*) II-4: 24. My62
  - “Test Results.” (*TLE*) III-1: 23. O62
  - “Test Results.” (*TLE*) III-1: 23. O62
  - “Winfried Stoekli.” (*TLE*) III-1: 24. O62
  - “School Enrollments.” (*TLE*) III-2: 24. D62
  - “Teaching Reading, A Long Range View.” (*TLE*) III-2: 4-5. D62
  - “Paul Hippauf.” (*TLE*) III-3: 24. F63
  - “Karl Bauer.” (*TLE*) III-3: 24. F63
  - “Accreditation of Dr. Martin Luther College.” (*TLE*) IV-1: 18. O63
  - “Statement Re Federal Aid to Church-Related Schools.” (*TLE*) IV-1: 19-20. O63
  - “Christian Day Schools in Synod.” (*LSB*) IV-1: 2-3. O33
  - “Test Results.” (*TLE*) IV-1: 24. O63
  - “School Enrollments.” (*TLE*) IV-2: 24. D63
  - “Church-Related Elementary Schools 1963-64.” (*TLE*) IV-3: 21-22. F64
  - “The School Visitor.” (*TLE*) IV-3: 5. F64
  - “The Christian Teacher and His Co-Workers.” (*TLE*) IV-4: 12-14. My64
  - “Edgar Blauert.” (*TLE*) IV-4: 20. My64
  - “More About Youth Groups.” (*TLE*) IX-2: 17-20. D68
  - “The Call: Procedures and Considerations.” (*TLE*) IX-2: 21. D68
  - “Synodical School Enrollments.” (*TLE*) IX-2: 22. D68
  - “Test Results.” (*TLE*) IX-2: 24. D68
  - “Church-Related Elementary/Secondary Schools.” (*TLE*) IX-3: 21-23. F69
  - “Teacher Walter Huber.” (*TLE*) IX-4: 21. My69
  - “The New Report Card.” (*TLE*) V-1: 16-17. O64
  - “Test Results.” (*TLE*) V-1: 24. O64
  - “The New Sunday School Course.” (*TLE*) V-2: 19-20. D64
  - “Prof. Huldreich Klatt.” (*TLE*) V-2: 22-23. D64
  - “Synodical School Enrollments.” (*TLE*) V-2: 23-24. D64
  - “A Curriculum Guide for Lutheran Elementary Schools.” (*TLE*) V-3: 13-15. F65
  - “Martin Dommer.” (*TLE*) V-3: 22-23. F65
  - “Test Results.” (*TLE*) VI-1: 24. O65
  - “Regulations for Certification.” (*TLE*) VI-2: 16-18. D65
  - “Guidelines Relative to Teachers’ Calls.” (*TLE*) VI-2: 18-19. D65
  - “Lutheran High School Enrollments.” (*TLE*) VI-2: 19. D65
  - “A Symposium.” (*LSB*) VI-2: 3-4. D35
  - “A Symposium.” (*LSB*) VI-3: 5-7. F36
  - “The Queen of Sheba, An Example for Christian Parents.” (*LSB*) VI-3: 8. F36
  - “Teacher William Winterstein.” (*TLE*) VI-4: 15. My66
  - “Teacher Arthur Pape.” (*TLE*) VII-1: 6. O66
  - “Bringing the Lutheran Heritage to Our Children.” (*TLE*) VII-2: 14-15. D66
  - “Christmas.” (*LSB*) VII-2: 2-3. D36
  - “Church-Related Elementary/Secondary Schools.” (*TLE*) VII-3: 14-15. F67
  - “Prof. H.R. Palmbach.” (*TLE*) VII-3: 5. F67
  - “Let All Things be Done With Charity.” (*LSB*) VIII-1: 1. S37
  - “John F. Meyer.” (*TLE*) VIII-1: 22. O67
  - “Installation or Induction of Women Teachers.” (*TLE*) VIII-2: 19. D67
  - “Teacher Frank Redeker.” (*TLE*) VIII-2: 20-21. D67
  - “Prof. R.M. Albrecht.” (*TLE*) VIII-2: 21. D67
  - “School Enrollments.” (*TLE*) VIII-2: 22-24. D67
  - “Concordia Catechism Series.” (*TLE*) VIII-3: 15-16. F68
  - “A Symposium.” (*LSB*) VIII-3: 5. F37
  - “The Statistics Speak.” (*LSB*) VIII-4: 6. My38
  - “Teacher Adolph Gerlach.” (*TLE*) X-1: 18. O69
  - “Test Results.” (*TLE*) X-1: 24. O69
  - “Teaching Christian Attitudes Toward Sex.” (*TLE*) X-2: 10-11. D69
  - “Statement on the Philosophy and Purpose of the CDS.” (*TLE*) X-2: 12-13. D69
  - “Filmstrips on Writing Behavioral Objectives.” (*TLE*) X-2: 14-15. D69
  - “School Statistics.” (*TLE*) X-2: 22. D69
  - “Church-Related Elementary/Secondary Schools.” (*TLE*) X-3: 14-15. F70
  - “Teacher James Enter.” (*TLE*) X-3: 24. F70
  - “Teacher Max Hackbarth.” (*TLE*) X-3: 5. F70
  - “Teacher Adelbert Backer.” (*TLE*) X-3: 5. F70
  - “Teacher Albert Schleef.” (*TLE*) X-4: 19. My70
  - “Teacher Henry Gruenhagen.” (*TLE*) XI-1: 3. O70
  - “Our Educational Journal.” (*TLE*) XI-1: 4. O70
  - “Guidelines for Participation in Social Security by Women Teachers.” (*TLE*) XI-2: 21. D70
  - “School Statistics.” (*TLE*) XI-2: 22-23. D70
  - “Teacher J.W. Wirth.” (*TLE*) XI-2: 5. D70
  - “Teacher Paul Kolander.” (*TLE*) XI-2: 5. D70
  - “Composition: A Boon, Not a Burden.” (*TLE*) XI-3: 15-17. F71
  - “Test Results.” (*TLE*) XI-3: 24. F71
  - “Teacher Arthur Maas.” (*TLE*) XI-4: 19. My71
  - “Test Results.” (*TLE*) XI-4: 21. My71
  - “Responsibilities and Activities of District BPE.” (*TLE*) XI-4: 22. My71
  - “Teacher Richard Raabe.” (*TLE*) XII-1: 17. O71
  - “Test Results.” (*TLE*) XII-1: 20. O71
  - “Synodical Resolutions Pertaining to Parish Education.” (*TLE*) XII-1: 23. O71
  - “School Statistics.” (*TLE*) XII-2: 5,9,14. D71
  - “Home Mission Policy re Establishment and Support of Miss. Day Schools.” (*TLE*) XII-3: 24. F72

- 
- . “Prof. Albert Stindt.” (*TLE*) XII-4: 6. My72
  - . “Test Results.” (*TLE*) XIII-1: 13. O72
  - . “School Enrollments.” (*TLE*) XIII-2: 6. D72
  - . “Teacher Theodore Lau.” (*TLE*) XIII-3: 14. F73
  - . “Test Results—Spring 1973.” (*TLE*) XIV-1: 11. O73
  - . “Women Teacher Consultants.” (*TLE*) XIV-1: 9-11. O73
  - . “School Enrollment.” (*TLE*) XIV-2: 22-24. D73
  - . “Mrs. Oscar Zander.” (*TLE*) XIV-2: 23. D73
  - . “Teacher Armin Huhn.” (*TLE*) XIV-4: 24. My74
  - . “Teacher John F. Gawrisch.” (*TLE*) XIV-4: 7. My74
  - . “Teacher Paul Koepsell.” (*TLE*) XIX-1: 9. O78
  - . “Test Results.” (*TLE*) XIX-1: 9. O78
  - . “School Statistics.” (*TLE*) XIX-2: 24. D78
  - . “Arthur J. Ehlke.” (*TLE*) XIX-3: 10. F79
  - . “Mr. Emil Leitzke.” (*TLE*) XIX-4: 4. My79
  - . “Home and School Training.” (*LSB*) XV-1: 1-2. O44
  - . “Teacher William Kuether.” (*TLE*) XV-1: 20. O74
  - . “DMLC—Ninety Years Old.” (*TLE*) XV-1: 24. O74
  - . “Teacher Waldemar Stindt.” (*TLE*) XV-1: 4. O74
  - . “Teacher Augusta Koch.” (*TLE*) XV-2: 18. D74
  - . “School Statistics 1974-1975.” (*TLE*) XV-2: 5. D74
  - . “Miss Ruby Reich.” (*TLE*) XV-4: 16. My75
  - . “Teacher Herman Fehlauer.” (*TLE*) XV-4: 19. My75
  - . “Miss Ida Sperling.” (*TLE*) XV-4: 23. My75
  - . “Mrs. Carl F. Pape.” (*TLE*) XVI-1: 13. O75
  - . “Miss Dorothy Westphal.” (*TLE*) XVI-1: 17. O75
  - . “Teacher Russell Griffin.” (*TLE*) XVI-1: 20. O75
  - . “Mission Fair—India Day.” (*TLE*) XVI-1: 6. O75
  - . “Second Draft of the Revised Enchiridion of Luther’s Cat.” (*TLE*) XVI-2: 12ff. D75
  - . “Wisconsin Lutheran College.” (*TLE*) XVI-2: 22. D75
  - . “Growth in Our Schools.” (*TLE*) XVI-2: 4-5. D75
  - . “Teacher Theodore Boettcher.” (*TLE*) XVI-4: 9. My76
  - . “Teacher Leo Luedtke.” (*TLE*) XVI-4: 9. My76
  - . “Teacher Edward Bradtke.” (*TLE*) XVII-1: 19. O76
  - . “Teacher Arnold Wilbrecht.” (*TLE*) XVII-1: 8. O76
  - . “Synodical School Enrollments School Statistics 1976-77.” (*TLE*) XVII-2: 21-22. D76
  - . “Teacher Frederick A. Grimm.” (*TLE*) XVII-2: 22. D76
  - . “Test Results.” (*TLE*) XVII-2: 4. O76
  - . “Mr. Fredrick Janke.” (*TLE*) XVII-3: 9. F77
  - . “Teacher Ferdinand W. Schultz.” (*TLE*) XVIII-1: 19. O77
  - . “Test Results.” (*TLE*) XVIII-1: 4. O77
  - . “Teacher Paul A. Jungkuntz.” (*TLE*) XVIII-1: 7. O77
  - . “Teacher Victor J. Schulz.” (*TLE*) XVIII-2: 22. D77
  - . “Teacher Orlan R. Dorn.” (*TLE*) XVIII-2: 22. D77
  - . “School Statistics 1977-78.” (*TLE*) XVIII-2: 23-24. D77
  - . “Teacher Gerhard A. Gilbert.” (*TLE*) XVIII-3: 11. F78
  - . “Teacher Eldor Kopitzke.” (*TLE*) XVIII-3: 11. F78
  - . “Teacher Robert E. Schierenbeck.” (*TLE*) XVIII-4: 4. My78
  - . “Teacher Waldemar A. Pape.” (*TLE*) XVIII-4: 4. My78
  - . “Test Results.” (*TLE*) XX-1: 24. O79
  - . “Mr. Gilbert Glaeser.” (*TLE*) XX-1: 4. O79
  - . “Reuben Kramer.” (*TLE*) XX-2: 21. D79
  - . “School Statistics.” (*TLE*) XX-2: 24. D79
  - . “Carl F. Pape.” (*TLE*) XX-3: 14. F80
  - . “Is the IQ on the Way Out?” (*LSB*) XX-3: 6-7. F50
  - . “Duties of the District Board of Education.” (*LSB*) XX-3: 8. F50
  - . “Test Results.” (*TLE*) XXI-1: 23. O80
  - . “Teacher Fred C. Falk.” (*LSB*) XXI-1: 7. O50
  - . “Christian Day School and Lutheran. High School. Statistics. 1980-81.” (*TLE*) XXI-2: 24. D80
  - . “Mr. Helmuth Ihlenfeldt.” (*TLE*) XXI-2: 9. D80
  - . “Mr. Alvin Jantz.” (*TLE*) XXI-2: 9. D80
  - . “Teacher Albert Mayer.” (*LSB*) XXI-4: 12. My51
  - . “Books.” (*TLE*) XXI-4: 21-22. My81
  - . “Test Results.” (*TLE*) XXII-1: 24. O81
  - . “Professor Adalbert Schaller.” (*LSB*) XXII-3: 1. F52
  - . “From Suffering to Easter Joy.” (*TLE*) XXII-3: 20-21. F82
  - . “Armin Rauschke.” (*LSB*) XXII-4: 10-11. My52
  - . “A Unit in Geography.” (*LSB*) XXIII-1: 7-8. O52
  - . “Gerhard A. Koepsell.” (*LSB*) XXIII-1: 8. O52
  - . “Test Scores.” (*TLE*) XXIII-2: 24. D82
  - . “A Unit on Geography (2).” (*LSB*) XXIII-2: 3-6. D52
  - . “Luther Books for Elementary School Libraries.” (*TLE*) XXIII-3: 20-22. F83
  - . “Mrs. Lorraine Vater.” (*LSB*) XXIII-3: 8. F53
  - . “Miss Ruth Priesz.” (*LSB*) XXIII-3: 8. F53
  - . “Rhoda Kiekbusch.” (*LSB*) XXIII-3: 8. F53
  - . “Luther Books: A Passel of Informal Reviews.” (*TLE*) XXIII-4: 3-5. My83
  - . “Test Scores.” (*TLE*) XXV-2: 21. D84
  - . “Test Scores—April 1985.” (*TLE*) XXVI-1: 21. O85
  - . “Have You Heard the Good News?” (*LSB*) XXVI-2: 5-6. D55
  - . “Emergency Teacher Training Course.” (*LSB*) XXVI-2: 8. D55
  - . “Mr. Fred Eggers.” (*LSB*) XXVII-1: 8. O56
  - . “Religious Words for Spelling.” (*LSB*) XXVII-2: 6. D56
  - . “I Am a Classroom.” (*TLE*) XXVII-3: 13-14. F87
  - . “Test Scores—April 1986.” (*TLE*) XXVII-3: 17. F87
  - . “Test Scores 1987.” (*TLE*) XXVIII-3: 57. F88
  - . “Off-Air Taping Guidelines.” (*TLE*) XXVIII-3: 71-72. F88
  - . “The Ambition to be a Church Worker.” (*TLE*) XXX-1: 22-24. O89
  - . “Otto H. Blase.” (*LSB*) XXX-4: 7. My60
  - . “Report of the Committee on Testing.” (*LSB*) XXX-4: 8. My60
  - . “Ernest F. Krause.” (*LSB*) XXX-4: 8. My60
  - . “Remember Your Umbrella: A review of Religious Materials for Children.” (LP). VIII-3:10-11 Jan/Feb01
  - . “Thank God for the PGA.” (ELS). VII:1,5 Sp/Su 2000
  - . “Reach Out and Touch Someone.” (ELS). VII:3 Sp/Su2000
  - . “Ask Me No Questions.” (ELS). VII:5 Sp/Su2000

- . "Why Use Praise." (ELS). VII:6 Sp/Su2000
- . "An Associate of Arts Degree in Early Childhood Education," (TLE). XLV-4: 126. M05.
- . "EduTech Announcement," (TLE). XLVI-3: 76-77. F06.
- Armstrong, Emily. "Learning Centers in Lutheran High Schools." (TLE). XL-2: 52-57 D99
- Arndt, Emanuel. "A Suggested List of Books for Your School Library." (TLE) II-1: 16-18. O61
- . "Education Digest, The." (TLE) II-4: 19-20. My62
- . "What Causes the Trouble?" (LSB) XIII-3: 3. F43 4---
- . "Open Sesame." (LSB) XIV-4: 5-6. My44
- . "What is New in Professional Books." (LSB) XIX-3: 5. F49
- . "The Teacher Looks at Interest." (LSB) XVII-1: 3-4. O46
- . "What is New in Professional Books." (LSB) XX-2: 2-3. D49
- . "What is New in Professional Books." (LSB) XX-3: 2. F50
- . "What is New in Professional Books?" (LSB) XX-4: 3-4. My50
- . "What is New in Professional Books." (LSB) XXI-2: 2-3. D50
- . "What is New in Professional Books." (LSB) XXII-2: 5-6. D51
- . "Theories of Learning (1)." (LSB) XXIII-1: 6-7. O52
- . "Theories of Learning (2)." (LSB) XXIII-2: 6-7. D52
- . "Theories of Learning (3)." (LSB) XXIII-3: 6-7. F53
- . "Theories of Learning (4)." (LSB) XXIV-4: 8-9. My54
- . "Book Review." (LSB) XXIX-1: 7-8. O58
- . "Book Review: The Christian Kindergarten." (LSB) XXV-4: 11-12. My55
- . "Book Review." (LSB) XXVIII-1: 5-6. O57
- . "Book Review." (LSB) XXVIII-2: 5-6. D57
- . "Book Review." (LSB) XXX-4: 5. My60
- Arndt, Dallas. "Listen, Learn, and Leader." (LL) VI-6: 18-19 Su98
- Arndt, Mrs. Emanuel. "Making the Classroom Inviting." (LSB) XXX-1: 4-5. O59
- Arndt, Rhoda. "Creating Interest in Outside Reading." (LSB) XXVIII-4: 7-8. My58
- Arndt, Ruth. "Teaching God's Little Ones." (TLE) VIII-4: 4-5. My68
- . "Disciplining Jesus' Little Lambs." (TLE) XIII-4: 8-9. My73
- . "Who Am I?" (TLE) XV-2: 9-10. D74
- . "Teacher, What are 'Flops'?" (TLE) XVI-1: 4-6. O75
- Arnold, Ray. "Prison Ministry at Saginaw." (PL) IV-1: 27,32 Fa95
- Arras, Florence. "Courtesy and Conduct of a Christian Teacher." (TLE) I-4: 4-7. My61
- Ash, Richard. "Biology—The Study of Life." (TLE) XII-3: 23. F72
- Aswege, Dawn. "Connecting Race With Grace." (LP) IX-3: 13-14 Jan/Feb 02
- . "Wired for Life." (LP) XI-1: 24 Sep/Oct 03.
- Averbeck, Julia. "Parent Involvement in the Kindergarten." (TLE) XI-4: 5-6. My71
- . "Have You Considered a Preschool?" (TLE) XIV-3: 13-14. F74
- . "Primary Grades Salute the Bicentennial, The." (TLE) XVI-3: 7-8. F76
- . "Do I Get to Work on the Computer Today?" (TLE) XXIV-1: 5-6. O83
- . "Books." (TLE) XXIV-2: 5-6. D83
- . "Number Strips." (TLE) XXX-2: 47-48. D89
- . "Computers and Children With Special Learning Needs." (TLE) XXXII-1: 25-26. O91
- . "What is the Value of Diagnostic Testing?" (TLE) XXXVI-1: 8-10 O95
- Averbeck, Robert. "Crayon Techniques." (TLE) IV-1: 6-7. O63
- . "Christian Teacher and His Preparation, The." (TLE) IV-4: 17-18. My64
- . "Parent's Role in Education, The." (TLE) VI-1: 8-9. O65
- . "Helping Children Appreciate Art." (TLE) VI-3: 6-7. F66
- . "Sociogram, The." (TLE) VII-1: 9-10. O66
- . "Revitalizing the Book Report." (TLE) VII-3: 6-7. F67
- . "Teacher-made Tests." (TLE) VIII-1: 8-9. O67
- . "Focus on Listening." (TLE) X-1: 7-9. O69
- . "Posters That Communicate." (TLE) X-2: 6-7. D69
- . "I Hear America Singing." (TLE) X-3: 6-7. F70
- . "Personalized Approach to Spelling, A." (TLE) XI-1: 11-12. O70
- . "Nature Crafts." (TLE) XI-2: 6-7. D70
- . "Reporting Test Results to Parents." (TLE) XII-1: 6-7. O71
- . "Aids to Creative Writing." (TLE) XII-3: 6-7. F72
- . "Learning Can Be Fun." (TLE) XII-4: 4-6. My72
- . "Poetry for Enjoyment." (TLE) XIV-4: 5-7. My74
- . "Observing 125 Years of Grace in Our Schools." (TLE) XV-1: 7-9. O74
- . "Three-Dimensional Art." (TLE) XV-2: 11-12. D74
- . "Possibilities with Pantomime." (TLE) XV-3: 6-7. F75
- . "Learning Center Activities." (TLE) XVI-1: 7-8. O75
- . "Folk Art of America." (TLE) XVI-3: 9-10. F76
- . "Corner for Art, A." (TLE) XVII-1: 9-10. O76
- . "Take Time for Writing." (TLE) XVII-3: 12-13. F77
- . "Family Art Projects." (TLE) XVII-4: 9-10. My77
- . "Printmaking in All the Grades." (TLE) XVIII-1: 10-11. O77
- . "Development of Visual Symbolization, The." (TLE) XVIII-2: 13-14. D77
- . "Book Reviews." (TLE) XXIV-1: 7-8. O83
- . "Are We Having Art This Week?" (TLE) XXVII-1: 18-20. O86
- . "DBAE—What is It?" (TLE) XXVII-2: 10-13. D86
- . "Developing a DBAE Curriculum." (TLE) XXVII-3: 3-

8. F87
- . “Resources for Teaching Art.” (*TLE*) XXVIII-4: 6-9. O87
- Baacke, Linda. “Focus Your Ministry.” (*LL*) V-4:21-22. Su 97
- Backer, Bruce. “Organ Music For the Distribution.” (*TLE*) I-2: 17-20. D60
- . “O Come, Let Us Sing Unto the Lord.” (*TLE*) I-4: 18-19. D61
- . “Honey to Your Mouth.” (*TLE*) V-3: 16-17. F65
- . “Accompanying the Liturgy.” (*TLE*) XVI-3: 20-22. F76
- . “The Message of the Reformation in Luther’s Hymn: From Depth..” (*TLE*) XXIII-3: 15-18. F83
- . “Let the Glory of the Lord Dwell Richly Among Our Children.” (*LSB*) XXIX-4: 1-6. My59
- Backer, Emil. “The Choir Leader and Organist.” (*LSB*) II-3: 5-6. J32
- . “The Organist and the Choir Leader.” (*LSB*) II-4: 4-5. Mr32
- . “Choir and Organ Music for the Christmas Season.” (*LSB*) III-2: 5-6. N32
- . “Choir and Organ Music for the Lenten and Easter Season.” (*LSB*) III-3: 4. F33
- . “Choir Music.” (*LSB*) IV-3: 2-3. Ap34
- . “Music Review.” (*LSB*) VII-2: 6-7. D36
- . “Chorale and Hymn Playing.” (*TLE*) XI-4: 17-19. My71
- . “The Teacher as Organist.” (*LSB*) XIII-4: 1-3. My43
- . “Lutheran Composers.” (*LSB*) XIX-2: 3-4. D48
- . “Lutheran Composers.” (*LSB*) XIX-4: 3. My49
- . “Musicians of the Lutheran Church.” (*LSB*) XVII-1: 5-6. O46
- . “Musicians of the Lutheran Church.” (*LSB*) XVII-4: 6-7. My47
- . “Lutheran Composers of the 17th Century.” (*LSB*) XVIII-2: 5-6. D47
- . “Lutheran Composers (Bach).” (*LSB*) XVIII-4: 4-5. My48
- . “Composers of the Lutheran Church (Reuter).” (*LSB*) XX-2: 4-5. D49
- . “Chorale and Hymn Playing.” (*LSB*) XXIV-2: 3-4. D53
- Baer, Eugene. “Trinity’s Adult Education Program.” (PL) I-2: 17-18 Sp93
- . “In Response to: ‘But This Isn’t English Class.’” (*TLE*) XXV-3: 11-12. F85
- Baer, Eugene + Tech. “Communication: A Basic Skill.” (*TLE*) XVIII-3: 14-16. F78
- Baer, G.S. “Henry E. Kahnert.” (*LSB*) XXIX-1: 7. O58
- Bailey, Darleen. “Primary Language Arts.” (*TLE*) III-3: 4-5. F63
- Bakken, Debra. “The Congregation and the Child.” (PCE) III-2: 22-23. Fa91
- . “Relationships in the Sunday School (4): The Congregation and.” (PL) IV-2: 31-32 Sp96
- Baldauf, Sharon. “Sports: A Learning Experience for Children.” (*TLE*) XXIX-2: 42-46. D88
- Balge, Ellen. “The Blessings of Inclusion: An Example From a WELS School.” (PL) IV-2: 13,15 Sp96
- Balge, Jonathan. “It’s Not Yours.” (*TLE*). XLVII-4: 127-128. M07.
- Balge, Kristi. “Better Bedtime Behavior.” (*LP*) IX-1: 14-15 Sep/Oct 01
- Balge, Richard. “The Sermon Is a Cooperative Effort.” (PL) I-2: 12. Sp93
- . “Dangers Inherent in Attending a State School.” (*TLE*) XIV-3: 2-4. F74
- Barber, John. “We Put Up a Poster but Nobody Came!” (PL) I-1: 32-33. N92
- . “Spreading the Good News: Insights and Tips on Parish Media U.” (PL) I-2: 45-47 Sp93
- . “Planning a VBS Promotion.” (PL) II-2: 28-29 Sp94
- . “Planning a VBS Promotion.” (PCE) II-3: 40-41. Wi90
- . “The Church’s Advertising Budget.” (*LL*). IX-3:20-21 Sp01
- Bare, James. “Take it to heart.” (LP). VII-4: 4 Mar/Apr00
- Barnes, Glenn. “Use of Visual Aids with Rear Projection.” (*TLE*) IV-1: 10-11. O63
- . “Productive Thinking Through Questioning.” (*TLE*) XIII-1: 17-19. O72
- . “Functions of Questions.” (*TLE*) XIII-2: 11-13. D72
- . “Teaching the Gifted Child—Who?” (*TLE*) XXV-2: 16-18. D84
- Bartel, Fred. “Public Performance in Music.” (*TLE*) XIX-4: 14-15. My79
- . “Music Ideas for Christmas Eve.” (*TLE*) XX-1: 19-21. O79
- . “Part-singing.” (*TLE*) XX-3: 20-22. F80
- . “Getting Ready for Part-Singing.” (*TLE*) XXV-3: 7-8. F85
- Bartel, Grace. “Teaching the Gospel to the Hearing Impaired: Teacher’s Perceptions.” (PCE) I-2: 27. Fa89
- . “Finger Fun.” (PCE) II-3: 42-43. Wi90
- Bartling, Mark. “Who Was Martin Luther?” (*TLE*) XXIII-3: 18-19. F83
- Bartz, Barb. “Information Please!” (*LL*). XIII-1: 4-15 Fa04.
- Bassett, Caleb. “World War I and Its Impact on German-Lutheran Education and Religious Freedom in America.” (*TLE*). XLVI-4: 102-113. M06
- Bauer, David. “Solfege is Superb!” (*TLE*) XLII-4:104-109 My01
- . “Finding Time for Music.” (*TLE*). XLV-3: 84-87. F05.
- Bauer, Gerhard. “Observing the Reformation in Our Schools.” (*TLE*) II-4: 8-9. My62
- . “From a Principal to His Staff.” (*TLE*) IX-1: 7. O68
- Bauer, Jackie. “Chart Your Course.” (LP) III-1: 5. Sep/Oct 95
- . “Ensuring Success.” (LP) III-2: 8. Nov/Dec 95
- . “Report Cards: A “Teachable Moment”.” (LP) III-3: 7. Jan/Feb 96
- . “Parents, School, and Standardized Tests.” (LP) III-4: 7. Mar/Apr 96
- . “Building Healthy Parent/Teacher Relationships.” (LP)

- III-5: 7. May/June 96
- . “Turn Conflict Into Peace.” (LP) III-6: 8. July/Aug 96
- . “Is She Ready to Start School?” (LP)IV-6:9. July/Aug 1997
- . “Who’s in Favor of Year-round School?” (LP)V-1:9. Sep/Oct 1997
- . “And Have a Nice Ride.” (LP)V-2:8. Nov/Dec 1997
- . “The back-to-bedtime blues.” (LP)IV-6:9.July/Auhgusy 1997
- . “Parent-teacher Organizations: A Status Report.” (LP) VI-1: 9 Sep/Oct98
- . “Sprechen englisch?” (LP) VI-2: 9 Nov/Dec98
- . “What in? What’s Out?” (LP) VI-3: 14 Jan/Feb 99
- . “A Proactive Approach.” (LP) VI-4: 9 March/April99
- . “The Family Merry-go-round.” (LP) VI-5: 9 May/June99
- Baumler, Daniel. “Head Cheese Evangelism.” (PL) II-2: 17-18 Sp94
- Bauer, David and Edward Meyer. “Sing and Make Music: Recordings.” (TLE). XLI-4: 106-107 My01
- Bauer, Elvera. “My Prayers for Prisoners.” (LL). IX-2:24-25 Win01
- Baumler, Gary. “Christians in Crisis.” (PL) I-3: 42 Su93
- . “Promises Mean Everything to a Child.” (PL) III-1: 30-31 Fa94
- . “Read This ! It’s for You!” (PL) IV-2: 11-12 Sp96
- . “More Than Kaffeeklatsching.” (TLE) XVI-1: 18-20. O75
- Bauer, Gerhard. “The Gospel Goes to Prison.” (LL). VII-3: 8-10 Sp99
- Bauer, Jackie. “Public Education is not “the enemy”?” (LP). VI-6: 14 Ju/Au99
- Becker, Bruce. “Fixing the Problem of Six.” (PL) III-3: 12-13 Su95
- . “All Those in Favor of God’s Word, ....” (PL) IV-1: 9-11 Fa95
- . “Growing Up.” (PL) IV-2: 4-5,7 Sp96
- . “Training Men for Ministry.” (PL) IV-2: 8-10 Sp96
- . “Planning and Promoting the ABCs.” (PL) IV-3: 48-50 Su96
- . “Stored Power.” (LL)VI-2:22-23. Wi98
- . “Does Change Mean Decay?” (LL)VI-6:20-21. Wi 98
- . “Change the Pace.” (LL) X-2: 24-25 Wi 2002
- . “It Isn’t Always Either/Or.” (LL) IX-4:18-19 Su01
- . “Leaders are Born and Made.” (LL) X-4:32 Su02
- . “Leadership: Learning When to Say When.” (LL) X-2: 32 Wi 2002
- . “Leadership: Using Your Staff.” (LL) X-3:32 Sp02
- Becker, James P. “Display Your Diamond.” (TLE) XXXIII-2: 43-48. D92
- Becker, Siegbert. “I Walk in Danger All the Way.” (TLE) V-4: 2-3. My65
- . “TEV—Shall We?” (TLE) XIII-3: 2-3. F73
- . “Danger of Overemphasizing Academic Achievement.” (TLE) XIV-4: 2-5. My74
- Beckmann, Laurel. “Some Ideas for Your Devotions.” (TLE) XXVI-4: 12-14. My86
- Baumler, Gary. “Remember to Keep Going.” (LL). VIII-2:18-19 Wi00
- Behringer, James. “Christ-serving or Self-serving.” (PL) II-2: 39 Sp94
- Beres, Pamela, “Gone Fishin’.” (LP)IV-6:5. July/August 1997
- . “Shake the Family Tree.” (LP)V-2:12-13. Nov/Dec 1997
- . “Kids in the Money Maze.” (LP) VI-3: 7-8 Jan/Feb 99
- Becker, Bruce. “Practicing What We Preach.” (LL). VIII-2:22-23 Wi00
- . “Expect, Encourage, and Enable.” (LL). IX-1: 20-21 Fa(LL)00
- . “God’s Stewards.” (LL). IX-3:14-17 Sp01
- . “The Earth is the Lord’s.” (LL). IX-3:18-19 Sp01
- . “All Mission Congregations.” (LL) XII-1: 4-7 Fa03.
- . “Leadership: A Vocation from God.” (LL) XII-2: 32 Wi04.
- . “Leadership: Being the Church.” (LL) XII-4: 32 Su04.
- . “Leadership: Expecting the Best.” (LL) XI-4: 32 Su03.
- . “Leadership: Opening Up a New World.” (LL) XII-3: 32 Sp04.
- . “Leadership: Out in Front to Get Behind.” (LL) XI-2: 32 Wi03.
- . “Leadership: Preaching the Gospel.” (LL) XII-1: 32 Fa03.
- . “Leadership: Service with a Smile.” (LL) XI-1: 32 Fa02.
- . “Leadership: We’re Not in Kansas Anymore.” (LL) XI-3: 32 Sp03.
- . “Where Have All the People Gone?” (LL) XI-2: 4-5 Wi03.
- . “Leadership: Leaders Love to Lead Love.” (LL). XIII-2 32 Wi05. Leadership.
- . “Leadership: Mining the Resources.” (LL). XIII-1: 30 Fa04.
- Becker, James. I’m Adopted. (LL). VIII-1: 28-29 Fa99
- Becker, Philip. “Church Musician.” (LL) XII-2: 28-29 Wi04.
- Behringer, James & Lisa Kluge. “Narrowing the Gap.” (LL). VII-3: 28-29 Sp99
- Beres, Pamela. “It’s a Date!” (LP). VIII-2: 13 Nov/Dec00
- . “Kids--Cliques and Clubs.” (LP). VII-5: 12-13 May/June00
- . “Speaking of Shyness.” (LP) IX-3: 6-7 Jan/Feb 02
- . “They Want, We Want, I Want, God Wants.” (LP) X-3: 4-5 Ja/Fe 03.
- Berg, Linda. “How Do You Motivate and Encourage Learning in Children.” (PCE) III-3: 40-41. Wi91
- . “Wanted: More Time.” (TLE) XII-3: 4-5. F72
- . “Quality in Questioning.” (TLE) XX-4: 7-9. My80
- . “The Single Teacher: Serving Singly.” (TLE) XXXII-3: 81-84. F92
- Bergenthal, Guy. “Study the Sacraments.” (LL). VIII-1: 22-23 Fa99
- Berger, Marie. “Positive Ways in Which the Teacher Can

- Influence the Growth." (*TLE*) XXV-2: 7-8. D84
- Bergholz, Hoge. "Guidance in Our High Schools." (*TLE*) VI-1: 13-15. O65
- Biedenbender, Laurie. "The LES Principal: His Joys and Challenges." (PL) III-1: 20,23 Fa94
- . "Mommy Mania." (LP). VI-6: 12-14 Ju/Au99
- . "What Mommy Needs Most." (*LP*) VI-5: 14-15 May/June99
- . "Bad Parenting Moment #467." (LP) XI-1: 4-5 Sep/Oct 03.
- . "Children: On Loan." (LP) XI-5: 31 May/Jun04.
- Bierwagen, Bertha. "Teaching with Enthusiasm." (*TLE*) IX-2: 4-5. D68
- . "Mom, May I Have 25 Cents?" (*TLE*) VIII-2: 4-5. D67
- . "Think Overhead First." (*TLE*) X-1: 10-11. O69
- Bierwagen, H.F. "Spener and Francke." (*LSB*) XVI-2: 6. D45
- Bilitz, Rose. "Classroom Conflicts=Teachable Moments." (*TLE*) XXXVI-3: 68-70 F96
- Bilitz, Jonathan. "Bombs, Guns, Fists, Tongues." (LP) X-4: 6-8 Ma/Ap 03.
- . "One of the Other Nine." (LP) XI-2: 30-31 Nov/Dec 03.
- Birkholz, Gerhard. "Prepare God's People." (PL) I-1: 48-49. N92
- Birkholz, Mark. "Young and Old." (*LL*). VIII-3: 26-27 Sp00
- Bitter, Alan. "Levels of Sanctification: Accepting and Encouraging." (*TLE*) XXXII-2: 50-58. D91
- . "How Should We Teaching Reading?" (*TLE*) XXXIV-2: 36-43. D93
- . "Alan Bitter Replies." (*TLE*) XXXIV-4: 113-114 My94
- Bitter, Donald. "Pastor as Promoter of the Christian Day School, The." (*TLE*) I-3: 2-3. F61
- . "Lutheran Mask, The." (*TLE*) VII-3: 2-3. F67
- . "Pastor as Promoter of the Christian Day School, The." (*TLE*) X-3: 10-11. F70
- Bitter, Mark. "An Outreach Program: Christmas for Kids." (PL) I-3: 46-47 Su93
- . "Awesome and Worthy." (LP). VIII-4: 14-15 Mar/Apr01
- . "Color Them Forgiven." (LP) IX-4: 14-15 Ma/Ap 02
- Blauert, Fritz. "Instilling a Love for Singing." (*TLE*) XXXII-1: 27-29. O91
- Blauert, Karl. "Modern Mathematics in Our Schools." (*TLE*) VIII-1: 24. O67
- Bliefernicht, E.R. "For the Next Schoolyear." (*LSB*) II-1: 1. S31
- . "Psychological Measurements (part 4)." (*LSB*) IX-1: 2-3. S38
- . "Psychological Measurements (part 5)." (*LSB*) IX-3: 2-3. F39
- . "Psychological Measurements (part 6)." (*LSB*) IX-4: 3-4. My39
- . "Psychological Measurements (Part 1)." (*LSB*) VIII-1: 3-5. S37
- . "Psychological Measurements (part 2)." (*LSB*) VIII-2: 3-5. S37
- . "Psychological Measurements (part 3)." (*LSB*) VIII-4: 3-4. My38
- . "Motivation of School Work." (*LSB*) XIII-2: 2-4. D42
- . "The Teacher Studies the Temperament of the Child." (*LSB*) XVI-1: 2-3. O45
- Bluhm, Merle. "Our Friends Who Need Jesus List." (*LL*)V-4:23-24. Su 97
- Blume, F.E. "Education in Ancient Greece." (*LSB*) XVII-1: 4-5. O46
- . "Education in the Hellenistic Age." (*LSB*) XVII-2: 6-7. D46
- Board for Parish Education. "A Statement on the Philosophy of Christian Education." (*LSB*) XXX-2: 3-4. D59
- Bode, Glenn + Kirk. "High School TV Production: A Conversation." (*TLE*) XVII-1: 16-19. O76
- Bode, Douglas. "Celebrate Life." (LP) XI-2: 6-8 Nov/Dec 03.
- Bode, Steve. "Introducing the Lutheran Hymnal ca 1941." (PL) II-1: 4-5,9 Fa93
- Boeder, John. "Introducing "Daylight." (*TLE*). XLVI-3: 78-79. F06.
- Boehlke, Paul. "Honest Weight—No Springs." (*TLE*) XIV-3: 20-21. F74
- . "Nature of Science: Implications for Creationists, The." (*TLE*) XVIII-4: 8-10. My78
- . "Book Review." (*TLE*) XXV-4: 3. My85
- . "Book Review." (*TLE*) XXVI-2: 14. D85
- . "Give It a Twist." (*TLE*) XXX-1: 18-19. O89
- . "Dinosaurs, God's Creatures Part I." (*TLE*) XXXI-3: 52-57. F91
- . "Dinosaurs: God's Creatures Part 2." (*TLE*) XXXI-4: 76-80. My91
- . "Here Come the Dinosaurs." (LP)V-1:6-8 Sep/Oct 1997
- Bohme, Shannon. "WELS Elementary Teachers Speak Out About Foreign Language in Elementary Schools." (*TLE*)XXXVIII-4 107-112. My98
- Boeldt, Deb. "The "Growing Season"." (LP) III-5: 6-7. May/June 96
- Boerneke, Leroy. "Education for Educators." (*TLE*) II-1: 2-3. O61
- . "Suffer the Little Children." (*TLE*) VI-4: 6-7. My66
- . "Broadening Intellectual Horizons." (*TLE*) XXIII-1: 22-24. O82
- Boileau, Dave. "Who Would Have Dreamed ... ?" (PL) IV-3: 11-13 Su96
- Boileau, Elaine. "Playgroup Evangelism." (PL) I-3: 36 Su93
- Boll, Arlyn. "Lights that Shine!" (*TLE*) XI-3: 7-8. F71
- . "That Man Again." (*TLE*) XII-1: 10-12. O71
- . "Who Is He? What Does He Want?" (*TLE*) XIII-2: 14-15. D72
- . "Where's He Going? What's He Doing?" (*TLE*) XIII-3: 12-14. F73
- Bolle, Carl. "Church Music With Special Emphasis on the

- Choir." (*LSB*) XV-2: 2-3. D44
- Bonack, Jeffrey. "The Long Road Back." (*LP*). VII-5: 6-8 May/June00
- Bondow, Susan. "Starving for Perfection." (*LP*) III-4: 12-13. Mar/Apr 96
- Borchardt, Paul. "Church Camping." (*TLE*) III-4: 15-17. My63
- . "Study Missions in Sunday School?" (*TLE*) IV-2: 15-17. D63
- . "Saturday Schools." (*TLE*) V-4: 19-21. My65
- . "Did You Hear What Your High School Student Said?" (*TLE*) XIII-3: 15-18. F73
- Borgwardt, Wayne. "Parish Student Assistance Programs." (*PL*) I-3: 32 Su93
- . "The Dynamic Triangle of Church Leadership." (*PL*) II-3: 8,11 Su94
- . "Boost Up and Out: Placement Services in an Area Lutheran HS." (*TLE*) XIII-4: 16-18. My73
- . "Infant Walks! Development of the WELS Association of LHS." (*TLE*) XXI-2: 12-14. D80
- . "Let's Hear It For Adequate Administration." (*TLE*) XXV-3: 4-7. F85
- . "Moving Forward with Technology." (*LL*) X-3:4-7 Sp02
- Born, Silas. "Preparing Tapes for the Instructional Center." (*TLE*) XI-2: 19-20. D70
- . "Our Future is the Past." (*ELS*) I-1:6 Fa97
- . "Our Future is in the Past." (*ELS*) I-1: 6 Fa 97
- . "Dyslexia-Intervention." (*ELS*) I-3:3 Su98
- Bowe, Keith. "Principals: Overseers Who Serve." (*LL*) X-4:24-25 Su02
- Brandt, James. "Outreach in Parish Schools." (*LL*) XII-1: 28-29 Fa03.
- Braun, John. "Lord, Help Me As a Parent!" (*LP*) III-1: 15. Sep/Oct 95"
- . "There's a War Going On." (*LL*)V-1:14-17. Fall 97
- . "Joy in a Long Race." (*LL*)V-2:814-17. Wi 97
- . "Life Is an Act of Worship." (*LL*)V-3:14-17. Sp 97
- . "God's Word Is the Christian Family's Advantage." (*LL*)V-4:13-17. Su 97
- . "Families Have Changed." (*LL*)VI-1:14-17. Fa 97
- . "Model, Teach, and Pray" (*LL*)VI-2:14-17. Wi98
- . "Move Forward—An Interview with Jerry Murphy." (*LL*)VI-6:14-17. Wi 98
- . "Hear! Hear!" (*LL*). VII-3: 14-17 Sp99
- . "Survivor--First-grade style." (*LP*). VIII-6: 10-11 July/Aug01
- . "We Have a Future!: An Interview with Robert Johannes." (*LL*). VIII-4: 14-17 Su2000
- . "Radiate: An Interview With Richard and Lorraine Raabe." (*LL*). IX-2:14-17 Win01
- . "Coming Home: An Interview with Craig Parton." (*LL*). VIII-1: 14-17 Fa99
- . "Patient Leadership: An Interview with John Brenner." (*LL*). VIII-2:14-17 Wi00
- . "Just Get Started." (*LL*). VII-4: 14-17 Su99
- . "Follow Up: An Interview with Dave Zubke." (*LL*). III-3: 14-17 Sp00
- . "Communicate: An Interview with John Stellick." (*LL*) X:1 14-17 Fa01
- . "Dream: An Interview with Gary Baumler." (*LL*) X-3:14-17 Sp02
- . "Freeing Up the Pastor: An Interview with Randy Fink." (*LL*) IX-4:14-17 Su01
- . "Servant of Others: An Interview on Leadership." (*LL*) X-4:4-11 Su02
- . "Try New Things: An Interview with Brian Maurice." (*LL*) X-2: 14-17 Wi02
- . "Blessed: An Interview with Victor Manian." (*LL*) XII-2: 18-19 Wi04.
- . "Dear Lord, Forgive Me." (*LL*) XII-1: 8-10 Fa03.
- . "Grow and Stretch: An Interview with Brian Hennig." (*LL*) XI-4: 14-17 Su03.
- . "Love and Language: An Interview with Karl Walther." (*LL*) XII-1: 14-17 Fa03.
- . "Perspective on Trends." (*LL*) XI-3: 14-17 Sp03.
- . "Plan, Prepare, Proclaim: An Interview with Michael Hintz." (*LL*) XII-4: 14-17 Su04.
- . "Sow the Seed: An Interview with Carl Mischke." (*LL*) XI-1: 14-17 Fa02.
- . "Unconditional Gospel: An Interview with Paul Wendland." (*LL*) XII-3: 14-17 Sp04.
- . "Who's in Charge." (*LL*) XI-2: 14-17 Wi03.
- . "Sunrise or Sunset? What's Ahead for Confessional Lutheran Education." (*TLE*). XLVII-3: 70-78. F07.
- . "Thrill of the Savior: An Interview with David Kehl." (*LL*). XIII-2 14-17 Wi05.
- Braun, Mark. "Making Young People Effective Talkers for Jesus Christ." (*TLE*) XX-1: 7-9. O79
- . "Bible Cells?" (*TLE*) XX-3: 5-8. F80
- . "Stated Aim: To Worship What we Know, A." (*TLE*) XXI-2: 5-7. D80
- . "Is Waterskiing a Means of Grace?" (*TLE*) XXI-4: 5-7. My81
- . "Moses Offers a Program of Christian Education." (*TLE*) XXII-1: 5-8. O81
- . "Toward Broadened Horizons." (*TLE*) XXII-3: 17-19. F82
- . "God So Loved the World — A Review." (*TLE*) XXII-4: 5-7. My82
- . "Church not Disneyland." (*LL*) VI-6: 14-17 Su98
- . "Hummingbirds Don't Know the Words." (*LP*) VI-2: 5 Nov/Dec98
- . "Dads and Leaders." (*LL*) VII-2: 14-17 Wi99
- . "Leadership-Lutheran Style." (*LL*) VII-2: 26-27 Wi99
- Brenner, John. "School-to-Home Telephone Teaching Service." (*LSB*) XXVI-3: 7-8. F56
- . "Teacher Alice Helen Kuhnke." (*LSB*) XXVI-4: 7-8. My56
- . "Let Us Now Go Even Unto Bethlehem." (*LSB*) XXX-2: 1-2. D59

- . "The Crisis of Disrespect.." (LP). VIII-4: 6-8 Mar/Apr01
- Brick, Delmar. "Home and the Christian Day School, The." (TLE) VI-4: 8-9. My66
- . "Wittenberg—The Luther City." (TLE) VIII-3: 17-19. F68
- . "Call Night Sermonette." (TLE) XIX-1: 23-24. O78
- . "Be Strong and of Good Courage." (LSB) XXVI-3: 1-2. F56
- Brodbeck, Michael. "Instructional Media-Listening Centers." (TLE) XIX-4: 12-13. My79
- Brohn, Karina. "Keep the Light Burning." (LP) X-5: 28-29 My/Ju 03.
- Brokmeier, Kenneth. "Who Will Go?" (LP). VII-6: 4-5 July/Aug 00
- Brug, John. "Approaching a Majestic God." (PL) I-1: 25-26. N92
- Brunner, Mark. "Building Your Church Archives (1)." (PL) II-2: 30-31, 35 Sp94
- . "Building Your Church Archives (2)." (PL) II-3: 49-50 Su94
- Bruss, Wesley. "The Zambia-Iowa Connection." (PL) II-3: 27-28 Su94
- Brutlag, Ronald. "Teaming Up." (PL) I-2: 7-8. Sp93
- . "Who Will Go?" (TLE). XLI-4: 121 My01
- . "Teachers as Recruiters." (TLE). XLV-4: 113-114. M05.
- Bucholz, Esther. "Wir Sprechen Deutsch." (TLE) II-3: 4-5. F62
- Buck, Emily. "Science in Mind's Eye." (TLE). XLVII-4: 120. M07
- Buege, Charles. "Who Cares? We Do!" (LL). XIII-1: 28-29 Fa04.
- Buegel, Theo. "Golden Jubilee of the Minnesota Lutheran Teachers' Conference." (LSB) VII-2: 8. D36
- Buelow, Ronald. "Matins in the Classroom." (TLE) XII-2: 12-14. D71
- . "Equal Rights?" (TLE) XVI-2: 23-24. D75
- . "Being About Our Father's Business." (LL) V: 1-2 Sp99
- Buhrke, Rhonda. "Tempest in a Teapot." (LP) VI-2: 12-14 Nov/Dec 98
- Bunnow, David. "Television, Video, and the Local Congregation." (TLE) XXIV-3: 10-11. F84
- Burger, Norman. "Who Am I?" (LL). VIII-1: 26-27 Fa99
- Burk, Milton. "Blessed Advantages of Christian Schooling." (TLE) XVI-4: 4-5. My76
- Burmeister, Paul. "As Easy as Pie." (LP)V-1:5. Sep/Oct 1997
- . "Pictures that Pay Premiums." (TLE). XL-1: 14-17 O99
- . "What Friends are For." (LP) IX-5: 8 Ma/Ju 02
- . "Dear Anna: Letters to a Young Artist." (LP) XI-6: 28-29 July/Aug04.
- Burow, Sharon. "Integrating God's Word Throughout the Curriculum and Into The Classes" (TLE) XXXVII-1: 23-27 O96
- Busack, Dianne + Wormer. "A Look Inward: School Self-Study." (PL) II-2: 14 Sp94
- Bushman, John. "Making Use of Leisure Time." (LSB) XXV-4: 8-11. My55
- Busler, Brian. "Serve More." (PL) I-2: 22-23 Sp93
- Butzow, Michael. "The Administration of Quality Preschool Programs." (TLE) XXXI-2: 28-36. D91
- Cares, Mark. "Spiritual Checkups." (PL) II-2: 42-43 Sp94
- . "Speaking the Truth in Love to Mormons." (PL) III-3: 22-23 Su95
- . "Christmas for Adults." (PL) IV-3: 42-43 Su96
- . "Sound the Retreat for Adult Bible Class." (TLE) XXV-4: 18-19. My85
- . "Canvassing--A Fresh Look." (LL)V-1:11. Fall 97
- Carmichael, Scott. "I Can't Sit Still." (LL). IX-2:18-19 Win01
- . "Senior Volunteers." (LL). IX-2:8-10 Win01
- Carpenter, Craig. "The Feeding Frenzy Phase." (LP)IV-6:16. July/Aug 1997
- . "My Theory of Fix-it-ivity" (LP)V-1:16. Sep/Oct 1997
- . "Suffering Produces Home." (LP)V-2:17. Nov/Dec 1997
- . "The Kiss." (LP)V-3:16. Jan/Feb 1998
- . "Daddy Watch Me." (LP)V-4:14. Mar/April 1998
- . "Gone Fishin'." (LP)V-5:14. May/June 1998
- . "Why 14-year olds should drive." (LP)IV-6:16. July/August 1997
- . "Games People Play." (LP) VI-1:16 Sep/Oct98
- . "Tradition." (LP) VI-2: 16 Nov/Dec98
- . "A Nice Visit." (LP) VI-3: 16 Jan/Feb 99
- . "The Question." (LP) VI-4: 16 March/April99
- . "For a Good Night's Sleep." (LP) VI-5: 16 May/June99
- . "Paybacks." (LP). VII-5: 16 May/June00
- . "Emotion Smorgasbord." (LP). VIII-4: 16 Mar/Apr01
- . "Hand-me-ups." (LP). VII-3:16 Jan/Feb00
- . "Lessons." (LP). VII-4:15 Mar/Apr00
- . "My Vacation." (LP). VIII-3:16 Jan/Feb01
- . "Pets." (LP). VIII-6: 15 July/Aug01
- . "The Driving Lesson." (LP). VIII-5: 16 May/Jun01
- . "Fireworks." (LP). VII-6: 16 July/Aug 00
- . "My Kids, My Rules." (LP). VIII-2: 16 Nov/Dec00
- . "Pain." (LP). VIII-1: 16 Sep/Oct00
- . "A Clean Start." (LP). VI-6: 16 Ju/Au99
- . "Humility." (LP). VII-2: 16 Nov/Dec99
- . "All I Want for Christmas." (LP) IX-2: 16 Nov/Dec 01
- . "Backpacks." (LP) IX-4: 16 Ma/Ap 02
- . "Hands." (LP) IX-6:16 July/Aug02
- . "How To Embarrass Your Kids." (LP) IX-1: 16 Sep/Oct 01
- . "Old Enough." (LP) IX-5: 16 Ma/Ju 02
- . "Wrestling." (LP) IX-3: 16 Jan/Feb 02
- Carmichael, Scott. "Involving Seniors in Nursing Home Ministry." (PL) III-3: 43,45 Su95
- Charron, Craig. "The Sportsmanship Game." (LP) XI-3: 24 Jan/Feb04.
- Christiansen, F. Melius. "The Combination of Words and

- Music." (*LSB*) VII-4: 5-6. My37
- Chworowsky, John. "Youth Groups—Whither and How?" (*TLE*) VI-4: 19-20. My66
- Clark, David. "Overflowing Thanks to God." (PL) IV-1: 12-13 Fa95
- "Super Saturday." (*LL*). VII-4: 26-27 Su99
- Collyard, Larry. "An Open Letter." (PL) IV-3: 20-21 Su96
- "Old Friends: Impressions of Summer School at DMLC." (*TLE*) XXX-1: 16-17. O89
- "Teaching Meaningful Memory Work." (*TLE*) XXXVI-4: 110-115 M96
- "Humanness in a Supervisory Capacity: You are a Person Also, ." (*TLE*) XXXVII-2: 46-50 D96
- Conference of Presidents. "Installation of Women Teachers." (*TLE*) IV-2: 22. D63
- Cook, John. "Drinking? Not My Child." (LP) III-2: 11,15. Nov/Dec 95
- "With Your Eyes Open." (LP) VI-4: 14-15 March/April99
- "It Takes the Right Village." (LP). VIII-2: 14 Nov/Dec00
- Cook, Jorita. "The Old Rugged Cross." (*LL*) VII-2: 28-29 Wi99
- Cordes, Chris. "There's Hope for the Family." (PL) II-2: 44-48 Sp94
- Cortright, Charles. "Some Practical Advice about Pastoral Chant." (PL) I-3: 17-18 Su93
- "No Apology Needed." (*LL*)VI-1:22-23. Fa 97
- Covach, John. "Never Retire!" (*LL*). VII-3: 20-21 Sp99
- "Jesse's Story." (*LL*). IX-2:28-29 Win01
- CPS. "Teacher Call Activity, 1995." (PL) IV-1: 43 Fa95
- "Achievement Test Results." (PL) IV-1: 44 Fa95
- "CLIP Will Introduce You." (PL) IV-2: 30 Sp96
- Crass, Matt. "Making Bible Study a Priority." (PL) I-1: 10. N92
- Cuppan, Bruce. "That All May Serve." (PL) III-3: 39-40 Su95
- "Accessible to All?" (*LL*). IX-3:26-27 Sp01
- "Summer and Special People." (*LL*) X-2: 22-23 Wi02
- Czer, Larry. "Education 599: Writing Across the Curriculum." (*TLE*) XXX-3: 52-55. F90
- "The Body Politic of Church Service." (*TLE*) XXXIX-3: 67 F99
- Czer, Ramona. "Palest Ink: Record Keeping for Sunday Schools." (PCE) I-4: 52-53. Sp90
- "Sisterly Love." (*TLE*) XXXVII-3: 84-86 F97
- "If My Words Remain in You'." (PCE) II-2: 30-31. Fa90
- "The Parent and the Child." (PCE) III-2: 20-21. Fa91
- "Relationships in the Sunday School (2)." (PL) III-3: 46-47 Su95
- "Tending God's Artists." (*TLE*) XXX-2: 44-46. D89
- "Through Faith-Colored Glasses." (*TLE*) XXXIII-3: 95-96. F93
- "Letters From Home: Fair Art." (*TLE*) XXXIII-4: 126-127. My93
- "The Case for Missing Volunteers." (*TLE*) XXXIV-1: 22-23 O93
- "Sex Ed: Sharing and Listening." (*TLE*) XXXIV-2: 55-56 D93
- "First Year Thanks!" (*TLE*) XXXIV-3: 94-96. F94
- "Sweet Fruits." (*TLE*) XXXIV-4: 119-120 My94
- "If Only More Teachers Were Poets." (*TLE*) XXXV-1: 21-22 O94
- "High Drama in the Upper Grades." (*TLE*) XXXV-3: 80-82 F95
- "The Beginning and the End." (*TLE*) XXXVI-1: 21-23 O95
- "Notebooks of Discovery." (*TLE*) XXXVI-3: 79-81 F96
- "B-Ball: Some Post-season Musings." (*TLE*) XXXVI-4: 116-118 M96
- "Created Creative." (*TLE*) XXXVII-2: 57-59 D96
- "What is Solitude?" (*TLE*) XXXVII-4: 125-126 M97
- "Everyday Heroes." (*TLE*) XXXIII-1: 24-25. O92
- "What We Long to Hear." (*TLE*) XXXIII-2: 41-42. D92
- "Sisterly Love." (LP)V-2:10-11. Nov/Dec 1997
- "Gracious Uncertainty." (*TLE*)XXXVIII-2 50-52. D97
- "Teachers are From Mars; Parents Are From Venus." (*TLE*)XXXVIII-3 91-93. F98
- "Teachers Who Leave." (*TLE*) XXXVIII-4 118-120. My98
- "Words Matter." (LP) VI-1: 6-8
- "I Read a Book Once: A Student's Perspective." (*TLE*) XXXIX-2: 48-50 D98
- "The Story of a Reader." (*TLE*) XXXIX-4: 115-118 M99
- "Divine Details." (*TLE*) XXXIX-3: 77-79 F99
- "Befriending Connie." (*TLE*). XL-4: 115-121 My00
- "When Harry Met Dick, Jane, and Sally." (*TLE*). XL-2: 58-64 D99
- "How to 'Invent' a Child." (*TLE*). XL-3: 92-96 F00
- "A Work in Progress." (*TLE*). XL-1: 28-30 O99
- "Beached Grounded--Send Help." (*TLE*). XLI-2: 60-63 D00
- "Essaying Into Drafts." (*TLE*). XLI-4: 124-128 My01
- "Naming Airy Nothings." (*TLE*). XLI-1: 30-31 O00
- "We Are the Music Makers." (*TLE*). XLI-3: 70-76 F01
- "Shekinah Words: The Ministry of Creative Discipleship, Part 1." (*TLE*) XLII-2:59-63 D01
- "Wintering in Our Summer Notebooks: Part I- Wholeness and the Christian Teacher." (*TLE*). XLVI-3: 80-91. F06.
- Dahlke, J.C. "Martin Bussmann." (*LSB*) XXIX-2: 7. D58
- Daley, Evelyn. "Junglewalk (Nancy Tafuri)." (*TLE*) XXX-1: 21. O89
- Dallmann, J. E. "Revolutionary New Arithmetic Method." (*TLE*) III-4: 6-7. My63
- Danell, Alice. "Come and Peek." (*TLE*). XLV-2: 56. D04.
- Danner, Lauren. "A Christmas Eve Service in a Small Sunday School." (PCE) III-2: 30-31. Fa91

- Davis, Lyndee. "Sounding Out the Words of Parenting." (*LP*) X-1: 32 Sep/Oct 02
- . "Bananas and Wonder." (*LP*) X-6: 32 Ju/Au 03.
- . "Toenails." (*LP*) XI-2: 32 Nov/Dec 03.
- . "Another Ice Cream Day." (*LP*) XI-6: 32 July/Aug04.
- . "Awake, Alive, and Loved." (*LP*) XI-3: 32 Jan/Feb04.
- . "Emergency." (*LP*) XI-1: 32 Sep/Oct 03.
- . "How Much is Too Much?" (*LP*) XI-5: 32 May/Jun04.
- . "In God's Order, in God's Time." (*LP*) XI-4: 32 Mar/Apr04
- . "Keep Out." (*LP*) X-3: 32 Ja/Fe 03.
- . "Party in the Castle Dungeon." (*LP*) X-2: 32 Nov/Dec02.
- . "Playing at War." (*LP*) X-5: 32 My/Ju 03.
- . "My Little Leader." (*LP*) X-4: 32 Ma/Ap 03.
- Degner, Steven. "Summer Sunday School." (*PCE*) II-4: 53. Sp91
- . "We Believe—Therefore We Speak." (*PL*) III-3: 19,21 Su95
- Dehaan, Robert. "Helping the Withdrawn Child." (*TLE*) IX-4: 20-21. My69
- . "Discovering Children with Gifts." (*TLE*) IX-4: 22. My69
- Deltgen, Gail. "Cooperative Learning in the High School Classroom." (*TLE*) XXXIII-3: 76-77. F93
- . "Listening." (*TLE*) XXXV-1: 26-27 O94
- Deltgen, Gail L. "A Contemporary Form of Old Maid." (*TLE*) XXXIII-2: 49-51. D92
- Dewalt, Mark. "One-room Schools:Current Trends in Parochial Education," (*TLE*), XXXVIII-1 12-20 O97
- . "A Day in the Life of a One-room School." (*TLE*) XXXIX-4: 119-123 M99
- . "Using Course Contracts to Engage Students in the Learning Process." (*TLE*). XL-3: 83-86 F00
- Diener, Richard. "Attitudes: The Computer and Productivity for Educators." (*PL*) III-2: 32-33 Sp95
- . "E-mail, a Valuable Tool." (*PL*) III-3: 37-38 Su95
- . "Outside the Box." (*LL*) XII-2: 26-27 Wi04.
- DMLC Library Staff. "Helpful Gadgets: Some Clever Teaching Aids." (*TLE*) XIX-2: 21-23. D78
- Dobberstein, Donn. "Speak the Truth in Love." (*LL*) XII-3: 22-23 Sp04.
- Doebler, Matthew. "Cut Off Mickey's Ear." (*LL*) XI-3: 20-21 Sp03.
- Dolan, Rachel. "Lutherans and the Common School." (*TLE*) XXXIX-2: 36-41 D98
- Dommer, M.L. "A Presentation Showing How the Greatest ... Visual Education." (*LSB*) VII-2: 3-5. D36
- . "A Presentation Showing ... Visual Education (cont.)." (*LSB*) VII-3: 2-4. F37
- . "Calisthenics." (*LSB*) XIII-1: 4-5. S42
- Dorn, Ann. "S.O.S. Sunday." (*PL*) II-1: 43-45 Fa93
- Dorn, Howard. "A School Newspaper: A Means to Purposeful Teaching." (*TLE*) V-1: 6-7. O64
- Dorn, Jeff. "The Word on Our Doorframes." (*LP*) X-1: 6-8 Sep/Oct 02
- Dorn, Orlan. "Discovery—An Approach to Arithmetic." (*TLE*) IV-2: 7-8. D63
- Dorn, Owen. "Total Curriculum, The." (*TLE*) XIX-3: 15-16. F79
- . "The Single Teacher: Reaching Out to the Single." (*TLE*) XXXII-3: 84-86. F92
- . "Memory Work of Memory Treasures?" (*TLE*) XXXIX-3: 86-88 F99
- Dorn, W.F. "I Like Vacation Bible School." (*TLE*) II-1: 15-16. O61
- Dougherty, Terri. "What Our Kids are Watching." (*LP*) IX-1: 12-13 Sep/Oct 01
- Dowhen, Beth. "Vacation Bible School Crafts: Kits or Books." (*PCE*) II-4: 54-55. Sp91
- Drews, Evelyn. "What Can I Do For Art Friday?" (*TLE*) XIV-1: 5-6. O73
- . "Art For Christmas and Those Long Winter Months." (*TLE*) XIV-2: 11-13. D73
- . "Tissue Art Ideas—Plus a Few Others." (*TLE*) XIV-3: 7-9. F74
- . "One Last Art Article For the School Year." (*TLE*) XIV-4: 8-10. My74
- Duehlmeier, Margaret. "Planned Physical Education Experiences for Primary Children." (*TLE*) VII-3: 4-5. F67
- . "Ideas Are All Around." (*TLE*) XIV-1: 17-19. O73
- Duncan, Michael. "Home and School Cooperation: A Plan." (*PL*) II-3: 31-33 Su94
- . "How We Reorganized." (*LL*) IX-4:8-10 Su01
- . "Discipline: Take Ten From Glasser." (*TLE*) XX-4: 15-17. My80
- . "Anger in Their Eyes." (*LP*) IX-4: 10-12 Ma/Ap 02
- Dusseau, Ray. "Great Expectations." (*LP*) IX-1: 10-11 Sep/Oct 01
- Duveneck, Pamela, Amy McCargar, Elise Shambeau. "Saxon Phonics: Three Teachers Comment." (*TLE*). XLV-3: 88-93. F05.
- Ebe, Barbara. "Rainy Day Activities in the Classroom." (*LSB*) XXX-2: 6-7. D59
- Ebert, Kurt. "Teaching Stewards Through Video." (*PL*) IV-1: 14-15 Fa95
- Eckert, Paul. "Using the Part-Time for Full-Time." (*TLE*) X-2: 16-18. D69
- . "Concordia Sex Education Series, The." (*TLE*) X-3: 22-24. F70
- . "Part-Time Agency for Adults, A." (*TLE*) XI-1: 18-20. O70
- . "Released Time—A Good Answer for Part-time Agencies?" (*TLE*) XIII-1: 14-16. O72
- . "Part-Time Could's and Should's." (*TLE*) XIV-1: 20-22. O73
- Eggers, William. "The Teacher's Reward." (*ELS*). VI: 3 Fa99
- Eggert, Arthur. "Lutheran Cultures and the German Language: A Curriculum for ." (*TLE*) XXXV-2: 54-57 D94
- Eggert, Kurt. "Using Hymns in Your Societies." (*TLE*) I-4:

- 15-17. D61
- , “What Kind of Christmas Celebration?” (*TLE*) VI-2: 2-5. D65
- , “The Reformation Festival.” (*TLE*) VII-4: 21-23. My67
- , “Using Hymns in Your Societies.” (*TLE*) XIX-3: 8-10. F79
- Ehlers, Timothy. “Finding Prospects in Rural Settings.” (PL) II-2: 19-21 Sp94
- Ehlert, Leon. “Ascending Leadership Mountain.” (LP) X-4: 28-29 Ma/Ap 03.
- , “Knowing What to Say.” (*LL*) XII-4: 28-29 Su04.
- Ehlke, Lorna. “Bozo, the Busy Puppet.” (*TLE*) XII-1: 4-5. O71
- , “Primaries Explore Their Town.” (*TLE*) XII-4: 2-3. My72
- , “Saga of the Round Tables.” (*TLE*) XX-1: 13-14. O79
- , “Spoonfuls of Scripture.” (*TLE*) XXI-1: 8-9. O80
- , “Hi-Ho, The Cherry-O.” (*TLE*) XXII-4: 14-16. My82
- , “Penciled By Young Writers.” (*TLE*) XXIV-1: 20-21. O83
- , “What About Santa?” (*TLE*) XXIV-2: 17-19. D83
- , “Poetic Primaries.” (*TLE*) XXV-4: 15-17. My85
- Ehlke, RolandCap. “Teaching the Gospel to the Hearing Impaired: Parent’s Perceptions.” (PCE) I-2: 26.
- , “Harvest of Joy.” (*LL*). VIII-2:26-27 Wi00 Fa89
- Eich, John. “Council Consistency Amid Turnover.” (PL) IV-1: 18-20 Fa95
- Eickmann, Paul. “We Are Ambassadors.” (*TLE*) I-4: 2. My61
- , “In Plain Words.” (*TLE*) I-4: 3. My61
- , “Get to Grips With the Actual Stuff.” (*TLE*) XII-2: 2-3. D71
- , “The Liberal Arts in the Education of WELS Ministers.” (*TLE*) XXXI-1: 8-13. O90
- Eisenmann, Judith and John Wiederhold. “Recruiting Volunteers and Loving It!” (*LL*) VII-2: 18-19 Wi99
- Ellenberger, Larry. “The Gospel Works.” (PL) I-1: 35. N92
- , “Preserve the Foundation.” (*TLE*) XXI-1: 1. O80
- , “A Great Light.” (*TLE*) XXI-2: 1. D80
- , “Don’t Forget Your Coat.” (*TLE*) XXI-3: 1. F81
- , “Remembering Our Baptism.” (*TLE*) XXI-4: 1. My81
- , “Bearing the Cross.” (*TLE*) XXII-1: 1. O81
- , “Bethlehem and Beyond.” (*TLE*) XXII-2: 1. D81
- , “Fools for Christ.” (*TLE*) XXII-3: 1. F82
- , “More Than Conquerors.” (*TLE*) XXII-4: 1. My82
- , “The Attitude of Gratitude.” (*TLE*) XXIII-1: 1. O82
- , “Christmas at the Luther Home.” (*TLE*) XXIII-2: 1. D82
- , “Thanks for Luther — The Educator.” (*TLE*) XXIII-3: 1. F83
- , “Luther as Father.” (*TLE*) XXIII-4: 1. My83
- Elve, Philip. “Homework: A Solvable Problem?” (*TLE*) VII-3: 21-22. F67
- Endorf, Anna. “ChristLight: A First Look.” (*TLE*) XXXIX-4: 124-128 M99
- Engel, Natalie. “Speech Without Fear.” (*TLE*) II-2: 17-18. D61
- Enter, Sandra & Christine Rau. “Shurley English Program.” (*TLE*). XLV-2: 57-59. D04.
- Esmeier, Jim. “Jesus Cares, but Do Others?” (PL) III-3: 41-42 Su95
- , “New Technique Helps Communication.” (PL) IV-1: 31-32 Fa95
- , “Advocates of God’s Family.” (*LL*) VII-1: 22-23 Fa98
- , “Mephibosheth Who?” (*LL*). VII-3: 22-23 Sp99
- Evenson, Linda. “ADHD: Attention Deficit/Hyperactivity Disorder.” (LP) III-1: 4. Sep/Oct 95
- Esmeier, James, “Making Worship Accessible to Everyone,” (*LL*), V-3:22-23 Sp 97
- Evenson-Reed, Linda, “Why Can’t I Wear Socks to Bed?,” (LP), V-4:4-6 Mar/April 1998
- , “They Never Met My Mom!,” (LP), V-5:12-13 May/June 1998
- Everts, Laverna. “Phonics.” (*LSB*) XX-2: 6-7. D49
- Fairbairn, Helen. “You Can Go Home Again.” (*TLE*) XXIV-4: 19-20. My84
- Falck, Karla. “Teaching the Trinity in the Primary Grades.” (*TLE*) IX-3: 7-8. F69
- , “Curiosity Centers.” (*TLE*) XIII-2: 7-8. D72
- Fehlauer, Adolph. “Meaningful Memory Work.” (*TLE*) I-3: 9-10. F61
- , “The Christian Family Challenged.” (PL) II-1: 18-19 Fa93
- , “Sixty Years of Christian Higher Education.” (*TLE*) IV-2: 21. D63
- , “Elementary and Secondary Education, The.” (*TLE*) VI-3: 19-22. F66
- , “Can We Evaluate?” (*TLE*) VI-4: 4-5. My66
- , “Shall My School Participate?” (*TLE*) VIII-1: 21-22. O67
- , “New Sunday School Course, The.” (*TLE*) VIII-2: 14-15. D67
- , “Curriculum Studies.” (*TLE*) X-1: 22. O69
- , “In Memoriam: Emil Trettin.” (*TLE*) XI-1: 2-3. O70
- , “Multiplication and Division Combinations.” (*LSB*) XI-2: 5. D40
- , “Your Christian Schools.” (*TLE*) XII-2: 8-9. D71
- , “Children Can Be Taught to Sing.” (*TLE*) XIV-4: 17-21. My74
- , “God’s Grace and Our Christian Schools.” (*TLE*) XV-2: 4. D74
- , “Laborers with God.” (*TLE*) XVI-4: 6-7. My76
- , “Excuses.” (*LSB*) XXVII-4: 5-6. My57
- , “Our Responsibility.” (*LSB*) XXX-1: 3-4. O59
- , “Karl A. Jungkuntz.” (*LSB*) XXX-1: 8. O59
- , “The School Visitors’ Workshop.” (*LSB*) XXX-2: 3. D59
- Fehlauer, Jeanne. “Annie’s Ordeal.” (LP). VII-6: 6-7 July/Aug 00
- , “The Eazzy Way to Good Health.” (LP). VIII-1: 12-13 Sep/Oct00

- . "Something Wicked this way Comes." (LP). VII-3:10-11 Jan/Feb00
- . "God, What Am I Doing Here?" (LP) XI-5: 6-8 May/Jun04.
- Fehr, Anne. "In God's Strength Princeton Evangelical Lutheran School." (*ELS*) I-3:4 Su98
- Fellers, Debera. "New Direction for Women's Groups." (PL) II-3: 19,25 Su94
- . "Your Personal Spiritual Life." (PCE) II-4: 51-52. Sp91
- . "You Want Me to do What?" (PL) III-2: 21,23 Sp95
- . "Relationships in the Sunday School (1)." (PL) III-2: 14-15 Sp95
- Fellers, Jim & Debera. "The Example of Christian Marriage." (*LL*) VII-7: 3-7 Fa 98
- Fenner, Roger. "How Can You Afford Not to Have a Piano Couse?" (. (*TLE*). XLVI-1: 6-8. O05.
- Fenske, Louise. "How I Teach My Second Grade Pupils to Spell." (*LSB*) VIII-3: 6. F37
- Fenske, R.A. "God-Given Responsibility to Parents, The." (*TLE*) VI-4: 2-3. My66
- . "This I Did for You; What Will You do For Me?" (*LSB*) X-3: 1-2. F40
- Fenske, Siegfried. "Why a Sunday School Teachers' Training Course." (*TLE*) I-2: 12-13. D60
- Ferch, Dawn. "Kindergarten Readiness Testing." (*TLE*) XXXVI-2: 36-40 D95
- . "Brain-based Learning—Rediscovered." (*TLE*) XXXVII-1: 20-22 O96
- . "Computer Curriculum K-8," (*TLE*), XXXVIII-2 46-49 D97
- . "Leadership Style = Leadership Beliefs." (*TLE*). XI-1: 7-8 O99
- Ferch, George. "Do You Have Any Children of Your Own?" (*LP*) VI-5: 12-13 May/June99
- Festerling, Melissa. "The Importance of Parent-teacher Communication." (*TLE*) XLIII-3: 88-94 F03.
- . "Play: A Child's Best Teacher." (*TLE*). XLIV-3: 88-92 F04.
- Festerling, Roger, "God's Stuff," (LP), IV-6:12-13 July/Aug 1997
- Fischer, Gervasius. "The Children's Christmas Eve Service." (*TLE*) I-2: 14-17. D60
- . "The Children's Christmas Eve Service." (*LSB*) XI-2: 1-2. D40
- . "The Consolidated Elementary School." (*LSB*) XVII-3: 1-2. F47
- Fischer, Gilbert. "DMLC Moves Into Media." (*TLE*) XIV-3: 18-19. F74
- Fischer, Kenneth. "A Church Web Site?" (*LL*) X-3:18-19 Sp02
- Fisher, Kimberly. "Inclusion in Our Schools." (*LL*). XIII-2 24-25 Wi05.
- Fischer, Robert, Arnold Nommensen. "Planning Support for Schools." (*TLE*). XLV-3: 79. F05.
- Fischer, Wayne. "Special Education? We ARE Doing It!" (PL) II-2: 15-16 Sp94
- . "What Will Make It Happen?" (*TLE*) XXXIII-3: 80-84. F93
- . "Discipline and the Special Needs Child." (*TLE*) XXXIV-4: 100-103 My94
- Fischer, William. "Personal Bible Study: An Interview With Richard Grunze." (PCE) III-1: 12-13. Su91
- . "How Effective is Our Teaching of the Confirmation Class?" (*TLE*) VIII-2: 11-13. D67
- . "Effective Use of Our Part-Time Educational Agencies." (*TLE*) X-1: 14-16. O69
- . "Publications for the Part-Time Agencies in the Church." (*TLE*) XII-4: 18-21 My72
- . "Why a Separate Beginners' Course in Sunday School?" (*TLE*) XIII-4: 19-20. My73
- . "Evaluating Religious Materials." (*TLE*) XIX-4: 5-7. My79
- . "Are You a Part-time Worker?" (*TLE*) XV-3: 16-18. F75
- . "Moralizing—The Confusion. of Law and Gospel When Teaching. Children. (1)." (*TLE*) XVII-1: 2-6. O76
- . "Are We Short-changing the Sunday School?" (*TLE*) XX-4: 5-7. My80
- . "The New WELS Catechism." (*TLE*) XXII-4: 23. My82
- . "Cradled in His Arms' Some Questions and Answers." (*TLE*) XXVI-1: 5-6. O85
- . "Moralizing—The Confusion. of Law and Gospel When Teaching. Children. (2)." (*TLE*) XXVII-3: 18-22. F87
- Fleischmann, Robert, "Still. Here for a Reason," (LP), V-3:14-15 Jan/Feb 1998
- . "The Christian Family Reaches Out", (*LL*), VI-1:20-21 Fa 97
- Flunker, Charles. "Ascension Day Sermon By Children, An." (*TLE*) VII-3: 8-9. F67
- Foelske, Wayne. "Integration of Computers in the Science Classroom." (*TLE*) XXIX-4: 82-90. My89
- Found, Lester. "In Favor of Art for High School Curricula." (*TLE*) XVIII-2: 8-10. D77
- Franzmann, Martin. "Theology Must Sing." (PL) II-3: 14-15 Su94
- . "An Educational Ideal." (*LSB*) XI-3: 1-3. F41
- . "Commencement Address." (*LSB*) XIII-1: 2-4. S42
- Franzmann, Thomas. "They Serve Behind the Scenes—Sunday School Teachers." (*TLE*) XXVI-4: 19-20. My86
- Franzmann, Werner. "She Hollered Me Across the Street." (*TLE*) II-4: 21-22. My62
- . "It was Him Who I Saw." (*TLE*) III-1: 19-20. O62
- . "I Mustof done it Accidentally—It's only Your Mother Tongue." (*TLE*) III-2: 17-18. D62
- . "Vereh Clevah, Meh Deah! Pomposities of Speech and Related P." (*TLE*) III-3: 19-21. F63
- . "Yeah, We Done Two Themes In Our Senior Year." (*TLE*) III-4: 20-21. My63
- . "Glory to the New-Born King—Born of the Virgin

- Mary." (*LSB*) XVII-2: 1. D46
- . "An Order of Service for a Conference of Pastors/Teachers." (*TLE*) XXVII-2: 18-21. D86
- Fredrich, Edward. "Key Chore of a Key Course in Secondary Social Studies." (*TLE*) IV-2: 9-11. D63
- . "Growing Trees: A Two-Year Lutheran Confirmation Course." (*TLE*) XIII-4: 21-22. My73
- . "Recognizing Conflict Between Christian Education and World Philosophy of Education." (*TLE*) XIV-2: 4-6. D73
- Fredrich, Janet. "Parents and Teachers: Learning to Communicate and Work Together." (*TLE*). XLVII-2: 46-50. D06
- Freeburn, Sharon. "Reaching Out through a Neighborhood VBS." (*PL*) II-2: 24-25, 29 Sp94
- Freeman, Leonard. "Talk the Talk; Walk the Walk." (*LL*), VI-1: 4-7 Fa 97
- Freese, John. "Addressing Parental Concerns: Eight Habits of Highly Effective People." (*TLE*) XXXVII-1: 13-19 O96
- . "Addressing Parental Concerns: Eight Habits of Highly Effective People." (*TLE*) XXXVII-2: 36-41 D96
- . "Future Trends and Lutheran Education." (*TLE*). XL-3: 87-91 F00
- Freese, John. "Not Even a Thread or the Thong of a Sandal: Government Aid to Our Lutheran Schools." (*TLE*), XXXVIII-1 7-11 O97
- . "The WELS Synodical Structure: Transparent Service." (*TLE*), XXXVIII-2 53-55 D97
- Freese, John, Aimee Gorske, Jennifer Prinsky. "Service-Learning in the Lutheran School Curriculum." (*TLE*) XXXIX-3: 89-93 F99
- Freier, Mark. "The Vital Ingredient." (*PL*) III-1: 46-47 Fa94
- Frey, Conrad. "Curriculum Study and the Preparation of Course Syllabi." (*TLE*) VI-3: 10-11. F66
- . "What's the Right Direction." (*TLE*) XXXV-3: 91-92 F95
- . "A Generous Man Will Prosper." (*TLE*), XXXVIII-4 100-102 My98
- . "The Book of the Prophet Malachi." (*TLE*) XXXIX-1: 20-22 O98
- . "Philemon-A Conundrum?" (*TLE*) XXXIX-2: 56-58 D98
- Frey, Im. P. "The Proper Attitude Toward the Call." (*LSB*) XVI-4: 2-3. My46
- Frick, Carol. "Alpha People Bring Fun to Phonics." (*TLE*) XIII-4: 10-11. My73
- Frohworth, Glenn. "Now What." (*LL*) XI-2: 18-19 Wi03.
- Frutiger, Grace. "Work of Thy Fingers, The." (*TLE*) XI-2: 4-5. D70
- Fuhrmann, C.G. "First Aid." (*LSB*) X-4: 4-5. My40
- Galley, Virginia. "A Day in the Kindergarten." (*LSB*) IX-1: 3. S38
- Galstad, Martin. "The Value of the Child." (*ELS*). VII: 2, 4, 8 Sp/Su 2000
- Gawrisch, Wilbert. "What About Women Visitors?" (*TLE*) VII-1: 2-6. O66
- Gehrke, Ralph. "Lenten Meditation." (*LSB*) XXV-3: 1-2. F55
- Geiger, Gerald and Mark M. "VBS Outreach—Evaluated and Revitalized." (*PCE*) III-3: 48. Wi91
- Geiger, Michael. "Church Shoppers." (*LL*) X-4: 20-21 Su02
- Geiman, Ruth. "The Right Fit for Fragile Learners." (*LP*). VII-2: 6-7 Nov/Dec 99
- Gentz, A.A. "The Little Bottle of Salt." (*LSB*) XXIV-4: 1-2. My54
- Gentz, Grant. "Man in the Office, The." (*TLE*) XIV-2: 9-10. D73
- . "An Effective Board." (*LL*) VII-2: 4-7 Wi99
- Gentz, Marlene. "Speech and Dramatics Are Not Frills." (*TLE*) XV-4: 8-10. My75
- George, Michael. "Take the Challenge." (*LL*), VI-1: 26-27 Fa 97
- Gerlach, Bryan. "Communicating Baptism's Power." (*PL*) I-2: 15-16 Sp93
- . "Timpani for the Asking." (*PL*) II-2: 38 Sp94
- . "Choral Stewardship? Try a Motet Choir." (*PL*) III-1: 16-17 Fa94
- . "Questions about Christian Worship (1)." (*PL*) IV-2: 46-47 Sp96
- . "Ten Unexpected Years." (*PL*) IV-3: 30-31 Su96
- . "Questions About Christian Worship (2)." (*PL*) IV-3: 33-34 Su96
- . "Worship Renewal." (*LL*), V-3: 4-7 Sp 97
- . "Support Musicians." (*LL*). IX-1: 22-23 Fa(LL)00
- . "Worship Variety and Vitality." (*LL*) X-1: 22-23 Fa01
- . "Musical Colors for Worship." (*LL*) XII-4: 22-23 Su04.
- . "Comfortable or Compelling." (*LL*) XII-1: 26-27 Fa03.
- . "Greater Joy in Communion." (*LL*) XI-1: 20-21 Fa02.
- Gerlach, Jackie. "Teaching Children to Sing on Pitch." (*PL*) IV-3: 28-29 Su96
- . "Singing for Worship: Cognitive and Affective Outcomes." (*TLE*). XL-2: 36-39 D99
- Gerlach, Joel. "Myth of a Value-Free System, The." (*TLE*) IX-1: 2-4. O68
- . "Placard Parades and Assured Savings." (*TLE*) IX-2: 2-3. D68
- . "Educational Goals." (*TLE*) IX-3: 2-4. F69
- . "Home and the Sunday School, The." (*TLE*) VI-4: 10-12. My66
- . "Squeeze is On, The." (*TLE*) VIII-2: 2-3. D67
- . "No Smooth Crosses, Please." (*TLE*) VIII-3: 2-3. F68
- . "Child in the Eyes of Parents and Teachers, The." (*TLE*) VIII-4: 2-3. My68
- . "Teacher! About Your Call ...." (*TLE*) X-1: 2-3. O69
- . "More About a Teacher's Call." (*TLE*) X-2: 2-3. D69
- . "He Knows The Shepherd." (*TLE*) X-3: 2-3. F70
- . "Toward a Deeper Appreciation." (*TLE*) X-4: 2-3. My70
- . "Education on Center." (*TLE*) X-4: 21-23. My70
- . "Closed-Circuit Triangular 'Space' Project, The." (*TLE*)

- XI-4: 2-4. My71
- . "Being All Things to All Men." (*TLE*) XII-1: 2-3. O71
- . "Total Child Control—Again." (*TLE*) XIII-1: 2-3. O72
- . "Let us Pray!" (*TLE*) XIII-2: 2-4. D72
- . "Turn Up the Thermostat, Please!" (*TLE*) XIII-4: 2-3. My73
- . "It's Only a Matter of Interpretation?" (*TLE*) XV-1: 5-7. O74
- . "About Whether the Weather is About to Change, or Will It ...." (*TLE*) XV-2: 2-3. D74
- . "Christian Liberty and Religious Freedom." (*TLE*) XVI-1: 2-3. O75
- . "Holy Gospel, Not Holey Gospel." (*TLE*) XVI-2: 2-3. D75
- . "Abigail and Hector." (*TLE*) XVI-3: 5-6. F76
- . "Smile, God Loves You." (*TLE*) XVI-4: 2-3. My76
- . "Pressure of Persuasion." (*TLE*) XVII-2: 5-6. D76
- . "Two-Dimensional." (*LL*). VII-4: 18-19 Su99
- Gerlach, Vernon. "Evaluating the Arithmetic Program in Our Schools (1)." (*LSB*) XXI-1: 5-6. O50
- . "Evaluating the Arithmetic Program in Our Schools (2)." (*LSB*) XXI-2: 3-4. D50
- . "Evaluating the Arithmetic Program in Our Schools (3)." (*LSB*) XXI-3: 4-6. F51
- . "Evaluating the Arithmetic Program in Our Schools (4)." (*LSB*) XXI-4: 4-7. My51
- . "What is New in Professional Books." (*LSB*) XXII-1: 5. O51
- . "New Books for Younger Children." (*LSB*) XXII-3: 3-4. F52
- . "New Books for Younger Children." (*LSB*) XXIII-1: 5-6. O52
- . "New Books for Younger Children." (*LSB*) XXIV-2: 4-6. D53
- Giegling, Lillain. "Problems in My First/Second Grade Reading Course." (*LSB*) XIX-1: 3-4. O48
- Gieschen, Daniel. "Suggested School Enrollment Policies for Non-member Children." (*TLE*) XI-2: 12-15. D70
- Gieschen, Henry. "The Wind is Contrary." (*LSB*) IX-4 1-3. My39
- . "The Pastor as Protagonist of the School." (*LSB*) VI-4: 1-3. Ap36
- . "School Sermon." (*LSB*) XX-4: 1-3. My50
- Gieschen, Paul. "Formal Opening of the Milwaukee Lutheran Teachers College." (*TLE*) I-1: 18-19. O60
- . "What Should the Teacher Read?" (*LSB*) VI-2: 5-6. D35
- . "The School and Its Missionary Character." (*LSB*) VIII-4: 1-3. My38
- . "The Danger of Seeking Government Concessions." (*LSB*) XVI-2: 2-3. D45
- Gieschen, Philip. "Be Prepared... to Give Answer about Your Christian Faith." (PL) III-2: 40 Sp95
- Gieschen, Waldemar. "Knuckles in a Christmas Hymn." (*TLE*) IV-2: 2-3. D63
- . "The Delightful Fruits of Our Teaching." (*LSB*) XXIII-1: 1-3. O52
- . "Vignettes From Luther For Christmas." (*LSB*) XXVI-2: 1-3. D55
- Glaeser, Angelica. "Correlation in Religion." (*LSB*) XII-1: 3-4. S41
- Glaeser, Gilbert. "The Interrelation of the Lecture and the Dialog Methods." (*LSB*) XVI-4: 4-5. My46
- Glaeske, Kevin. "The Design of God in a Rose." (*TLE*). XLIV-4: 110-112, M04.
- Glaseke, Vilas. "The Assignment Process." (*TLE*). XLVII-3: 89-90. F07.
- Glende, Arthur. "Questions with a Purpose." (*TLE*) X-4: 6-7. My70
- . "A School Visitor's Gleanings (1)." (*LSB*) XXII-2: 7-8. D51
- . "A School Visitor's Gleanings (2)." (*LSB*) XXII-3: 6-7. F52
- . "A School Visitor's Gleanings (3)." (*LSB*) XXII-4: 8-9. My52
- Godfrey, William. "Christian Stewardship Training." (*TLE*) IX-4: 5-7. My69
- Goede, Harold. "The Science Corner." (*LSB*) XXIX-2: 6-7. D58
- Goede, Ned, "It Makes Me Feel Like Weeping," (LP), V-4:10-11 Mar/April 1998
- . "Lutheran School Culture." (*LL*). VII-4: 24-25 Su99
- Goede, Mabel. "Teaching Primary Arithmetic." (*LSB*) XXVI-4: 4-7. My56
- Golisch, David. "Lutheran Science Institute." (*TLE*) XV-4: 17-19. My75
- Gorske, Ronald. "Called to Counsel." (*TLE*) XVI-2: 16-18. D75
- Gosdeck, Kurt. "Get Smarter!" (*TLE*). XLVII-4: 112-119. M07.
- Gostchock, Scott. "Leadership for a New Era." (*TLE*). XL-3: 77-82 F00
- Gourley, Myrtle. "A Mother's Report on Comic Books." (*LSB*) XXVI-1: 3. O55
- Grabitske, Patricia. "A New Team on the Block—Teachers and Technology." (*TLE*) XXXVI-4: 122-124 M96
- . "TV—Friend or Foe?" (*TLE*) XXXVII-3: 80-83 F97
- . "Learning: Make It Stick," (*TLE*), XXXVIII-2 42-45 D97
- . "Prayer for Our Christian Teachers." (*TLE*). XLI-1: 4-5 O00
- Grabitske, Patricia. "Book Buddies: An Adventure in Cross-age Reading." (*TLE*). XLIV-1: 13-17. O03. Reading.
- . "Using Cooperative Groups to Promote Accountability." (*TLE*). XLIV-2: 52-57. D03.
- Granberg, Steve. "Church and School Together." (*LL*) XII-3: 26-27 Sp04. Elementary School.
- Grasby, James. "A Brief History of Hymnals Used in WELS Congregations." (*TLE*) XXII-3: 8-11. F82
- . "A Brief History of Hymnals Used in WELS Congregations." (*TLE*) XXII-4: 16-18. My82

- Greenfield, Gary. "Disadvantaged Child—Our New Frontier, The." *(TLE)* IX-4: 7-9. My69
- Greenfield, Sandra. "Extending the Classroom." *(TLE)* XX-3: 16-17. F80
- . "Goals—Off Paper and Into Practice." *(TLE)* XXI-4: 14-15. My81
- . "Tales of Tattling and Blaming." *(TLE)* XXV-3: 9-11. F85
- . "Are They Falling Through the Cracks?" *(TLE)* XXVI-3: 10-12. F86
- Griepentrog, Darlene. "Spreading the World: Sunday Schools are For Nurture and Evan." (PL) IV-3: 7-8 Su96
- Griffith, Brenda. "A Prayer on Reading Burtchaell." *(TLE)* XLII-1:26-31 O01
- Gronholz, Carol. "I Love You, Teacher." *(TLE)* XLIII-1: 16-18 O02.
- Gronholz, John. "Exploration of a Curricular Frontier." *(TLE)* XV-3: 19-21. F75
- . "Physical Education and Its Contribution to General Education." *(TLE)* XLI-1: 14-19 O00
- Groth, Lynn. "Start Off on the Right Foot in the Fall." (PCE) I-1: 11. Su89
- . "Investing in Our Children." (PCE) I-2: 19. Fa89
- . "Recruiting for the Preaching and Teaching Ministry." *(TLE)* XXX-1: 4-6. O89
- . "How Sunday Schools Can Help Parents," *(LL)*, V-4:25-27 Su 97
- Grubbs, Mark. "Recruiting Church Workers in the Area Lutheran High School." *(TLE)* XXXII-4: 108-112. My92
- Grubbs, Paul, Erin Zastrow and Edward Meyer. "Sing and Make Music: Future Classroom Teachers." *(TLE)* XLI-4: 112-113 My01
- Gruber, Joanne + Moldenhauer. "Christian Worship and the Copyright Laws." (PL) II-2: 32-35 Sp94
- Gruenhagen, Henry. "Getting Ready for the New School Year." *(LSB)* XXIX-4: 6-8. My59
- Grummert, Donald. "Your Christmas Joy." *(LSB)* XXVII-2: 1-2. D56
- Gruenewald, Cindy, "Our Friends Next Door," *(LL)*, V-2:18-19 Wi 97
- Grunwald, James. "The Role of Computers in Education." *(TLE)* XXXI-1: 4-7. O91
- . "How Has the Computer Changed Your Publications?" *(TLE)* XLI-1: 6-9 O00
- Grunze, Richard. "Necessary Choice, A." *(TLE)* VI-1: 2-4. O65
- . "Necessary Choice, A." *(TLE)* XIV-1: 2-4. O73
- . "Why So Few Fruits of the Spirit?" *(TLE)* XV-3: 22-24. F75
- . "Devotions in Our Schools." *(TLE)* XVIII-3: 8-9. F78
- . "Signs of the Time." *(TLE)* XXI-1: 20-23. O80
- . "Catechism Lessons." *(TLE)* XXI-4: 23-24. My81
- . "Moses Struck a Rock." *(TLE)* XXV-2: 2-5. D84
- . "Church History—Frosted Cake? or Staple Fare?" *(TLE)* XXVI-2: 4-7. D85
- . "Increasing Gospel Appreciation." *(TLE)* XXVII-2: 7-10. D86
- . "Skirting the Edges of Humanism." *(TLE)* XXVIII-1: 19-23. O87
- . "The Bicentennial of the Federal Constitution." *(TLE)* XXVIII-4: 1-4. O87
- . "Israelites Delight in God's Word." *(TLE)* XXXII-1: 10-14. O91
- Guentenberg, Wendi. "From Only Child to Older Child." (LP). VIII-5: 8 May/Jun01
- . "Telling Your First About Your Second." (LP). VIII-4: 4 Mar/Apr01
- Gulczynski, Dennis. "Psychology in the High School." *(TLE)* XVIII-1: 14-16. O77
- . "Youth Leaders as First-Level Counselors." (PL) IV-2: 41 Sp96
- . "The Anatomy of a Hissy Fit." (LP). VIII-4: 12-13 Mar/Apr01
- Gurath, Beverly. "Good Friday Children's Services." *(TLE)* XX-2: 22-23. D79
- Gurgel, Ann. "Hatchet (Gary Paulsen)." *(TLE)* XXIX-1: 24. O88
- . "The Facts & Fictions of Minna Pratt (Patricia MacLachlan)." *(TLE)* XXX-1: 20. O89
- Gurgel, Barb. "A Time for Everything." (PL) I-1: 21-22. N92
- Gurgel, Bart. "Raising Abel." *(TLE)* XLII-2:49-52 D01
- Gurgel, H.E. "Are We Underestimating the One-Room School?" *(LSB)* XVII-3: 4. F47
- Gurgel, Karl. "As One Who Serves." (PL) I-3: 8 Su93
- . "Bible Class." *(TLE)* II-2: 11-13. D61
- . "Leadership in the Last Days." (PL) II-3: 7-8 Su94
- . "The Chance of a Lifetime..every day," (LP), IV-6:8 July/Aug 1997
- . "Care Committee." *(LL)*. IX-1: 8-10 Fa(LL)00
- Haag, Keith. "Brother to Brother." (PL) I-2: 4-6. Sp93
- Haar, Beverlee. "Pre-Math Experiences." *(TLE)* XXVIII-3: 69-70. F88
- . "Preschool Curriculum." *(TLE)* XXXV-2: 58-60 D94
- . "Where Do I Begin?" *(TLE)* XXXV-3: 89-90 F95
- . "Early Childhood Education," *(TLE)*, XXXVIII-1 21-26 O97
- Haar, Susan; Carla Melendy. "Profiles of Ministry: The East Coast." *(TLE)* XXXII-4: 123-125. My92
- Haar, Thomas. "Ways to Help Area Lutheran High Schools." *(TLE)* XXVIII-4: 86-88. My88
- Habeck, Irwin. "Christmas in the Classroom." *(LSB)* XVI-2: 1-2. D45
- . "William C. Pahl." *(LSB)* XXVII-1: 7. O56
- Habermann, Elwood. "Piercing the Confusion." *(TLE)* IV-1: 2-3. O63
- . "Christian Teacher and his Calling, The." *(TLE)* IV-4: 2-3. My64

- . "From a Pastor to All Teachers." (*TLE*) IX-1: 6. O68
- . "Test of a Century, The." (*TLE*) VI-3: 2-3. F66
- Hackbarth, Herbert. "The Comic Book Problem and How We Cope With It." (*LSB*) XX-3: 4-6. F50
- Haehlke, Lora. "A Device for Stimulating Interest in Reading Library Books." (*LSB*) XXII-3: 5-6. F52
- Haferman, Al. "How Can I Serve the Lord in My Aging Years?" (*PL*) II-2: 26-27 Sp94
- Hagedorn, Ada. "Kindergarten Workshop, The." (*TLE*) VIII-1: 6-7. O67
- Hagedorn, Fred. "Christian Education." (*TLE*) III-2: 6-7. D62
- . "Teaching in the Inner City." (*TLE*) XI-4: 10-11. My71
- . "Spelling Religious Words." (*LSB*) XXIV-2: 7. D53
- . "Religious Spelling Words." (*LSB*) XXIV-4: 7. My54
- Hagedorn, Grace. "Looking Forward to Operetta Time." (*TLE*) VIII-3: 4-5. F68
- . "Ready or Not, Here I Come." (*TLE*) XIX-1: 13-14. O78
- . "Every Child an Expert." (*TLE*) XIX-2: 11-12. D78
- . "Nail it Down." (*TLE*) XIX-3: 11-12. F79
- . "Tattletale." (*TLE*) XIX-4: 10-11. My79
- . "Twenty-one Reasons Why I Teach." (*TLE*) XVIII-2: 15-16. D77
- . "Is That How You Grade?" (*TLE*) XVIII-3: 12-13. F78
- . "Learn to Sing in Six Easy Lessons." (*TLE*) XVIII-4: 13-14. My78
- . "Why Did You Volunteer?" (*TLE*) XX-4: 13-14. My80
- . "Cast Thy Bread upon the Waters." (*TLE*) XXI-2: 10-11. D80
- . "Of Peter Rabbit and Teeter-Totters." (*TLE*) XXI-3: 13-14. F81
- . "Hurray For Rey!" (*TLE*) XXII-3: 16. F82
- . "First Word, The." (*TLE*) XXIII-2: 18-20. D82
- . "Martin Luther." (*TLE*) XXIII-3: 12-14. F83
- . "The Faster the Better." (*TLE*) XXIII-4: 9. My83
- Hagedorn, Harold. "Sunday School Children From Unchurched Homes—Follow-up." (*PCE*) II-2: 23-24. Fa90
- . "Following Up on Unchurched Sunday School Children." (*PL*) III-1: 28-29 Fa94
- Hagedorn, Mrs. Fred W. "Rhythm Bands can be Fun." (*TLE*) VI-2: 6-7. D65
- Hahn, James. "How Franzmann's Commentary Enriched My Ministry." (*PCE*) III-3: 38-39. Wi91
- Hahnke, Lloyd. "Humble to Serve." (*TLE*) VII-2: 2-3. D66
- Hamisch, Marguerite. "Manuscript Writing." (*TLE*) V-2: 4-5. D64
- . "Aim and Values of an Object Lesson." (*LSB*) XVII-3: 5-6. F47
- Hanneman, Daryl. "Knowing the Terminology and Helping the Child." (*TLE*) XXXV-2: 44-50 D94
- . "Psychoeducational Evaluations." (*TLE*) XXXVII-1: 10-12 O96
- . "Preparing for the IEP Conference." (*TLE*) XXXIX-2: 59-61 D98
- Hansen, Neil. "Alone with the One You Love." (*PL*) I-3: 25 Su93
- Harris, Margaret. "Irlen Syndrome in the Classroom." (*TLE*). XLV-1:11-14. O04.
- Harstad, A.L. "One Room — One Faith." (*TLE*) XX-1: 1. O79
- Hartig, Vicki. "Note Cards From Heaven." (*LP*) III-1: 8-9. Sep/Oct 95
- . "Our Political Legacy." (*LP*) III-6: 6-7. July/Aug 96
- Hartman, Carol. "Teaching Morality in Public Schools." (*TLE*) XXXV-4: 106-110 My95
- Hartman, John. "The Power of Music." (*LL*). VII-3: 24-25 Sp99
- Hartman, Robert. "How to Welcome First-time Guests." (*PL*) III-1: 32,35 Fa94
- . "Ideas for Outreach." (*PL*) III-2: 38-39 Sp95
- . "Confirmation: Let's Make it Meaningful (1)." (*TLE*) XVII-3: 7-9. F77
- . "Confirmation: Let's Make it Meaningful (2)." (*TLE*) XVII-4: 4-5. My77
- . "Changing Neighborhoods." (*LL*). VI-6:22-23
- . "Which Size are You?" (*LL*). VIII-4: 18-19 Su2000
- . "Seniors Share Christ." (*LL*). IX-2:26-27 Win01
- . "Mission Outreach." (*LL*). VIII-2:8-10 Wi00
- . "Aufgwar ia Outreach Month." (*LL*) X-2: 18-19 Wi02
- . "Staffing the Evangelism Committee." (*LL*) IX-4:24-25 Su01
- Hartwig, Paul. "Area Lutheran High Schools: Are They Worth It?" (*TLE*) XXXIII-3: 72-75. F93
- Hartwig, Theodore. "Again, Anent Worship." (*TLE*) XIII-1: 12-13. O72
- . "Teaching About the Past: Its Sameness and Its Otherness." (*TLE*) XVII-4: 2-3. My77
- . "The Christian Understanding of History as Mystery." (*TLE*) XLIII-1: 19-27 O02.
- . "College Life at Oxford." (*TLE*) XXIII-2: 8-10. D82
- . "A Harrowing Bus Ride." (*TLE*). XLIV-4: 113-114, M04.
- . "Do Not Judge, or You, too, Will be Judged." (*TLE*). XLVII-3: 87-88. F07. .
- . "Luther, Faithful Servant of Holy Scripture." (*TLE*). XLVII-1: 23-29. O06.
- . "On Being Offended and Taking Offense." (*TLE*). XLVI-4: 126-127. M06.
- . "Parents, Teachers, Don't Shortchange Those Young Memories." (*TLE*). XLIV-1: 6-12. O03.
- . "Portrait of a Master Teacher." (*TLE*). XLIV-4: 102-109, M04.
- Hasley, Karen. "Drama, the Psalter, and the Classroom." (*TLE*) XIX-3: 13-14. F79
- . "Hobbits and Other Living Creatures." (*TLE*) XVI-4: 10-11. My76
- . "Putting Hobbits to Work." (*TLE*) XVII-1: 14-15. O76
- . "Drama and the Psalms." (*TLE*) XX-2: 15-16. D79

- Hartzell, Eric, "The Same old Lies", (LP), V-5:6-8 May/June 1998
- . "A Christmas Conspiracy." (LP). VII-2: 5 Nov/Dec 99
- . "Show Me the Blessings!" (LP). VII-4:14-15 Mar/Apr00
- Hartzell, Luke. "Experiential Learning-Enhancing the Future of Education in our Schools." (*TLE*). XLVII-2: 60-64. D06.
- Hatzung, Michael. "Sunday School: A Mission Arm of the Church." (PCE) II-1: 10-11. Su90
- Hawkes, Elizabeth. "Teaching and Learning in the Preschool." (*TLE*) XXXI-3: 63-67. F91
- . "A Young Child's Portfolio," (*TLE*), XXXVIII-1:4-6 O97
- Heckmann, George. "Teaching Conservation Effectively (1)." (*TLE*) III-1: 8-9. O62
- . "Teaching Conservation Effectively (2)." (*TLE*) III-2: 8-9. D62
- . "Role of the Unit Method in Teaching Social Studies." (*TLE*) IV-2: 5-6. D63
- . "An Evaluation of Science Texts (Grades 7 and 8)." (*LSB*) XXI-2: 5-6. D50
- . "Archaeology Come to Life." (*TLE*) XXIV-4: 8-11. My84
- Hefti, R.W. "Rote, Writing, and Roads." (*TLE*) XLIII-3: 73-87 F03.
- Heiden, Delores. "Volunteer Tutors in Reading: Recruitment and Training of Volunteers." (*TLE*). XL-4: 100-107 My00
- Heiden, Delores and Vicki Riness. "Volunteer Tutors in Reading: Taking the First Steps." (*TLE*). XL-3: 68-76 F00
- Heidtke, Doris. "Newsflash." (*TLE*) XI-3: 9-10. F71
- Heidtke, Earl. "Where Will We Get Them?" (PL) I-1: 39-40. N92
- . "Bringing a Global View to the Classroom," (*TLE*), XXXVIII-3 68-71 F98
- Heier, Otto. "Why the Lutheran Educator." (*TLE*) I-1: 2-3. O60
- . "Religion in the Public School." (*TLE*) I-2: 2-3. D60
- . "Rugged Individualists." (*TLE*) I-2: 2. D60
- . "The Constraint of the Love of Christ in Our Training Program." (*LSB*) XXVIII-4: 1-2. My58
- Heiges, William. "Go to Them." (*LL*) VII-1 24-25 Fa98
- . "Give Children Back." (*LL*). VIII-3: 8-10 Sp00
- . "Starting with the Family." (*LL*) XII-3: 24-25 Sp04.
- Heine, Beverly. "Views on Curriculum Study." (*TLE*) XIII-1: 6-7. O72
- Heine, C.F. "The Dignity of the Child." (*LSB*) XII-1: 1-3. S41
- Heinitz, Brian. "Worship Leaders are Educators." (*LL*) X-4:22-23 Su02
- Heins, Ronald. "Can the Blind Lead the Blind." (PL) I-3: 11 Su93
- . "Member Tuition—Bane or Blessing." (PL) I-3: 29-30 Su93
- . "Ten Ideas on Change," (*LL*), VI-3:4-7 Sp98
- . "Adapt--Don't Change," (*LL*), VI-3:28-29 Sp98
- . "Managing Conflict." (*LL*) X:1 8-10 Fa01
- . "To Save Some." (*LL*) XI-3: 4-7 Sp03.
- . God's "Love is Always Concrete." (*LL*). XIII-2: 4-7 Wi05.
- Heinz-Petersen, Debra. "Characteristics of a Motivating Teacher." (*TLE*) XXXIII-3: 85-88. F93
- . "Motivating Students for Learning." (*TLE*) XXXIII-4: 113-117. My93
- . "The Beginning, the Middle, the End." (*TLE*) XXXIV-1: 4-10 O93
- . "Attention Deficit Hyperactivity Disorder." (*TLE*) XXXIV-2: 44-50. D93
- Heise, Don. "The Cost of Church Libraries." (PL) III-1: 36,39 Fa94
- Hellermann, William. "Dangers of Moralizing in the Training of Children." (*LSB*) XI-1: 1-3. S40
- . "Our Backward Pupil (1)." (*TLE*) XII-2: 10-11. D71
- . "Our Backward Pupil (2)." (*TLE*) XII-3: 11-14. F72
- . "Our Backward Pupil (3)." (*TLE*) XII-4: 10-12. My72
- . "Good Manners." (*LSB*) XIV-1: 3-5. S43
- . "Training Children to Find Pleasure in Their Faith-Life." (*LSB*) XXVIII-3: 2-5. F58
- Helwig, Donald. "A Victory for the Sage." (PL) IV-1: 33-34 Fa95
- . "Why Do We Have...?" (*TLE*) XIX-2: 8-10. D78
- . "Home Visitation." (*TLE*) XIX-4: 8-9. My79
- . "Devotions Written and Led by Children." (*TLE*) XVIII-1: 12-13. O77
- . "Classroom Christmas Party?" (*TLE*) XVIII-2: 11-12. D77
- . "Parent School Visitation." (*TLE*) XX-1: 17-18. O79
- . "Content vs. Study-skills." (*TLE*) XX-2: 12-14. D79
- . "Do You Love Me?" (*TLE*) XX-3: 12-14. F80
- . "A Memory That Ticks." (LP)IV-6:10-11 July/Aug 1997
- . "From Generation to Generation." (*LL*)VI-2:18-19 Wi98
- Hemling, Timothy. "A Study of Saxon Math." (*TLE*). XLI-3: 86-90 F01
- Henkel, Linda. "Teaching the Word with Puppets." (PL) III-1: 26-27 Fa94
- Hennig, Grace. "Parish Artistic Creativity." (*LL*) XI-4: 26-27 Su03.
- Hennig, James. "Annual Book Fair." (*TLE*) XVII-2: 23-24. D76
- Henning, Richard. "Sure We Have a Bible Class." (*TLE*) XIX-2: 5-7. D78
- . "Show Cory the Way Home." (LP) X-6: 6-7 Ju/Au 03.
- Henrickson, James. "Finding a Smaller World." (PL) IV-2: 26-27 Sp96
- . "Integrating Technological Tools into Today's Classrooms." (*TLE*) XXXVI-1: 11-29 O95
- . "By All Means Possible WELS TECH 2001." (*TLE*). XLI-3: 82-83 F01
- Hering, Bob. "Gospel-Powered Outreach: Mobilizing People

- With the Gospel." (PL) I-1: 29. N92
- Hering, John. "Communication Skills for Sharing Christ." (LL) XI-4: 20-21 Su03.
- Hering, Thomas. "The Principal." (PL) III-2: 27,30 Sp95
- . "Paying the Bill." (LL) VI-6:24-25 Sp98
- . "Special Needs Students: A Principal's Perspective." (TLE) XLII-4:110-114 My01
- Herman, Edgar. "Five Will Get You Ten: Expanding the 5-day VBS to 10 Days." (PCE) I-4: 54. Sp90
- . "When You Need a Washing Machine" (LL) VI-1:24-25 Fa97
- . "A Way into Prison." (LL). VII-4: 22-23 Su99
- . "Serve Community Institutions." (LL) IX-4:20-21 Su01
- Hermanson, Greg. "You're Forgiven." (LP) X-1: 30-31 Sep/Oct 02
- Hermanson, Roger. "Importance of Music Education, The." (TLE) XXI-3: 15-17. F81
- Hertig, Michael. "Profiles of Ministry: Questions and Answers." (TLE) XXXIII-4: 118-120. My93
- Hewitt, James. "School Closings a Blessing?" (TLE) XXVI-2: 16-18. D85
- Heyer, Arnold. "Training the Whole Child." (TLE) V-4: 6-7. My65
- Hintz, Michael. "Our Experience with Friendship Sunday." (PL) I-1: 36. N92
- . "Putting the Four P's of Bible Class Into Practice." (PCE) I-4: 62. Sp90
- . "Completing Our Joy." (LL) XI-1: 26-27 Fa02.
- . "Nothing I Can Do." (LL) XII-1: 22-23 Fa03.
- . "Impressive Voice Mail Messages." (LL). XIII-1: 16-17 Fa04.
- Hirons, Roger. "Leadership Development." (LL) X-4:18-19 Su02
- Hochmuth, Carl. "Smiling Faces--Evangelism in Our Schools." (LL) V-1:21-22 Fa97
- . "Worshiping with Children's Messages." (LL) V-3:20-21 Sp97
- . "The First Steps of a Christian Toddler Witness." (LL), VI-2:20-21 Wi98
- Hochmuth, Cheryl. "How to Have a Developmentally Appropriate Classroom." (TLE) XXXVI-1: 28-30 O95
- Hochmuth, Robert. "Sunday School Teachers, Your Ministry Does Make a Difference." (PCE) I-1: 3-4. Su89
- . "Confirmation Class: Who's to be the Teacher?" (PCE) II-1: 14-15. Su90
- . "Richard: Confirming the Retarded." (PCE) III-1: 3-4. Su91
- . "Consider the Alternatives." (TLE) IX-3: 5-6. F69
- . "SS + WBS = SS x 2." (TLE) X-3: 12-14. F70
- . "Shem, Ham, and Jane." (TLE) XIV-2: 2-3. D73
- . "Certified Quality Education." (TLE) XIX-1: 2-4. O78
- . "Fading World-Unfading Glory." (TLE) XIX-2: 2-4. D78
- . "Value Clarification Through Moral Dilemma." (TLE) XIX-3: 2-4. F79
- . "Turks, Wars, and Floods." (TLE) XIX-4: 2-4. My79
- . "Beyond Good Discipline." (TLE) XVIII-1: 2-4. O77
- . "What About Our Offense?" (TLE) XVIII-2: 2-4. D77
- . "Other End of the Open End, The." (TLE) XVIII-3: 2-4. F78
- . "Creative Spelling." (TLE) XVIII-4: 2-4. My78
- . "'79-'80 a Success?" (TLE) XX-1: 2-4. O79
- . "Breathing Heaven's Oxygen." (TLE) XX-2: 2-4. D79
- . "Evangelical—Loosely Speaking." (TLE) XX-3: 2-4. F80
- . "In the Margin." (TLE) XX-4: 2-4. My80
- . "Consider the Alternatives." (TLE) XXV-4: 7-9. My85
- Hoenecke, Edgar. "An Annual Challenge: Preparing a Children's Christmas Eve Ser." (PL) IV-3: 24-25 Su96
- Hoenecke, Gerald. "The Christchild and Our Children." (LSB) XX-2: 1-2. D49
- Hoenecke, Henry. "Have You Considered Prison Ministry." (PL) I-3: 43 Su93
- Hoenecke, Roland. "Professor Emil Backer." (LSB) XXVI-II-1: 7-8. O57
- Hoepner, Walter. "Lutheran High Schools." (TLE) I-3: 11-12. F61
- . "A Teacher's Preparation for the Bible History Lesson." (LSB) XI-4: 2-3. My41
- . "From Suffering to Easter Joy." (LSB) XXVII-3: 1-2. F57
- Hoewisch, Allison. "Linnea in Monet's Garden (Christina Bjork)." (TLE) XXX-3: 72. F90
- Hoffmann, M.F. "Busy Work." (LSB) X-4: 5. My40
- Holman, Cindi. "Young Worshipers." (PL) IV-3: 26-27 Su96
- . "I Hate Fridays." (LL) XII-2: 24-25 Wi04.
- Holman, James. "Service with a Smile?" (PL) IV-3: 17-18 Su96
- . "Listen to Me. I'm Talking to You." (PL) IV-2: 42-43 Sp96
- . "Never Used Teens." (LL) XI-1: 28-29 Fa02.
- Holzheuter, Ruby. "Composition in the Primary Grades." (LSB) XV-4: 3-4. My45
- Homan, Bonnie. "Teaching Bible Lessons to our Preschoolers." (TLE) XXXV-4: 104-105 My95
- Hopf, Stephanie. "The Faith of the Children." (LP) IX-2: 12-13 Nov/Dec 01
- Horn, Frederick. "Recommit to Serve Families." (PL) III-2: 47 Sp95
- . "Profiles of Ministry: Ministry of Disciplineship." (TLE) XXXIV-1: 24-26 O93
- Horn, Fritz. "Ideal Model or Model the Ideal." (PL) IV-2: 6-7 Sp96
- . "Spiritual Photosynthesis." (LL) V-4:28-29 Su97
- Huebner, James. "The 4 P's of Bible Class." (PCE) I-1: 14-15. Su89
- . "Welcoming Guests at Worship." (LL) V-3:26-27 Sp97
- Huebner, John. "What Does an Unbeliever Think?" (LL) V-1:4-7 Fa97
- Huebner, Lloyd. "The State, Christianity, Spiritual Values." (TLE) IX-1: 12-14. O68

- . "Bible—What a Wonderful Book, The." (*TLE*) VII-4: 4-8. My67
- . "Classroom Atmosphere." (*TLE*) VIII-2: 8-10. C67
- . "The Holy Ghost is Our Teacher." (*TLE*) X-3: 16-18. F70
- . "Making an Image." (*TLE*) XII-3: 2-3. F72
- Huhn, Armin. "Diagnostic and Remedial Reading (1)." (*LSB*) XXV-1: 2-4. O54
- . "Diagnostic and Remedial Reading (2)." (*LSB*) XXV-2: 3-6. D54
- . "Diagnostic and Remedial Reading (3)." (*LSB*) XXV-3: 3-5. F55
- . "Diagnostic and Remedial Reading (3)." (*LSB*) XXV-4: 3-7. My55
- . "Time Saving Suggestions for the Teacher." (*LSB*) XXVI-1: 4-5. O55
- Humann, E. "How to Make and Keep a Classroom Attractive." (*LSB*) XXVII-4: 6-8. My57
- Humann, Mrs. E. "How to Make and Keep a Classroom Attractive." (*TLE*) XVII-4: 11-13. My77
- Hunter, Randy. "Getting at the Core." (PL) IV-3: 46-47 Su96
- . "No Reserves, Retreats, or Regrets." (*LL*) XII-1: 20-21 Fa03.
- . "The Pastor is Key." (*LL*) XI-2: 28-29 Wi03.
- Hunter, Thomas. "Silence Is Not So Golden." (PL) IV-1: 47-48 Fa95
- . "Listen to This." (PL) IV-2: 24-25 Sp96
- Indahl, Andrea. "The Power of a Promise." (LP) X-3: 24 Ja/Fe 03.
- Ihlenfeldt, Alma. "The Value of Home Contacts for the Primary Teacher's Work." (*LSB*) XXI-1: 2-5. O50
- Ihlenfeldt, H.O. "Helps for the Study of Evangeline." (*LSB*) VIII-2: 5-6. S37
- . "The New Member on Your Staff." (*LSB*) XXIX-4: 8-9. My59
- Inniger, Jeff. "Is Your School Climate Controlled." (*LL*). XIII-1: 22-23 Fa04.
- Isch, John. "Explorers." (*TLE*) XVII-3: 14-15. F77
- . "Children Teaching Children." (*TLE*) XVII-4: 6-8. My77
- . "Mastery Learning." (*TLE*) XVIII-3: 20-22. F78
- . "The Owner's Manual." (*TLE*) XXIX-1: 3. O88
- . "Urgent Press Release." (*TLE*) XXIX-2: 27. D88
- . "Book Report." (*TLE*) XXVII-1: 21-22. O86
- . "Gladly, the Cross-eyed Bear." (*TLE*) XXVIII-1: 17-18. O87
- . "Content and Method in Teaching Primary Grade Religion." (*TLE*) XXVIII-2: 39-42. D87
- . "The Application in a Religion Lesson." (*TLE*) XXVIII-3: 51-53. F88
- . "On the Selection of Textbooks." (*TLE*) XXVIII-4: 89-92. My88
- . "School's In." (*TLE*) XXX-1: 3. O89
- . "Nurture." (*TLE*) XXXI-1: 3. O90
- . "Why Memorize?" (*TLE*) XXXI-2: 27. D90
- . "Shopping in the World's Marketplace." (*TLE*) XXXI-3: 58-62. F91
- . "When Did School Begin This Fall?" (*TLE*) XXXII-1: 3. O91
- . "How We Teach Religion, Part 1." (*TLE*) XXXII-1: 4-9. O91
- . "How We Teach Religion, Part 2." (*TLE*) XXXII-2: 36-43. D91
- . "The Single Teacher: Similarities & Differences." (*TLE*) XXXII-3: 80-81. F92
- . "The Real World." (*TLE*) XXXIV-1: 3 O93
- . "Vouchers." (*TLE*) XXXIV-3: 75-85. F94
- . "Before and After." (*TLE*) XXXV-1: 3 O94
- . "Developmentally Appropriate Early Childhood Education: Rating." (*TLE*) XXXV-2: 61-62 D94
- . "Alexander Pope and the Pentium Chip." (*TLE*) XXXV-3: 67 F95
- . "The Disappearing Children." (*TLE*) XXXV-3: 74-79 F95
- . "Always Know the Answer(?)." (*TLE*) XXXV-4: 111-112 My95
- . "Changes, changes." (*TLE*) XXXVI-1: 3 O95
- . "God is in the Details." (*TLE*) XXXVI-3: 67 F96
- . "Hunkered-down Christians." (*TLE*) XXXVII-1: 3 O96
- . "Referred to by a friend." (*TLE*) XXXVII-3: 67 F97
- . "Gains and Losses in WELS Lutheran Elementary Schools." (*TLE*) XXXVII-4: 114-121 M97
- . "A Bulletin Board Suggestion." (*TLE*) XXXIX-1: 3 O98
- . "Attitudes Toward Lutheran Schools: A 1992 Survey." (*TLE*) XXXIII-1: 18-23. O92
- . "The Best Congregation in Synod." (*TLE*) XXXIII-1: 3. O92
- . "Prosody and Religion Lessons." (*TLE*) XXXIII-2: 63-64. D92
- . "Some Things Don't Change." (*TLE*). XLI-3: 84-85 F01
- . "Only WELS People Will Be In Heaven." (*TLE*). XL-1: 3 O99
- . "How Is MLC Doing: The Alumni Respond." (*TLE*). XLI-2: 53-59 D00
- . "In Praise of the Consistently Competent." (*TLE*). XL-3: 67 F00
- . "To Group or Not to Group." (*TLE*). XLI-1: 22-29 O00
- . "The Well-Known Christian." (*TLE*). XLI-1: 3 O00
- . "Christians Teaching in a Public School." (*TLE*) XLII-1:10-25 O01
- . "Finding Elisha." (*TLE*) XLII-1:3 O01
- . "Of Franzmann, WELS and the US Census." (*TLE*) XLII-3:88-90 F01
- . "A Code of Ethics for Teachers in Early Childhood Education Programs." (*TLE*) XLIII-2: 37-40 D02.
- . "Keep Religion in Its Place." (*TLE*) XLIII-1: 3 O02.
- . "Videotaping in a Classroom." (*TLE*) XLIII-2: 57-60 D02.
- . "Are You Listening." (*TLE*). XLIV-1:3. O03..
- . "Two New Initiatives at MLC." (*TLE*). XLIV-3: 68-71.

- F04.
- Isch, John et al. "Book Reviews." (*TLE*) XXII-1: 18-21. O81
- Jabs, Emma. "Principal Blessings." (PL) IV-3: 44-45 Su96
- Jacobs, Paul. "Teaching Children to Witness." (PL) IV-1: 39-40 Fa95
- Jacobson, Gerald. "Choosing Instructional Materials." (*TLE*) XIII-1: 8-10. O72
- . "Cheap But Helpful." (*TLE*) XIII-2: 16-18. D72
- . "Reformation Educational Thought." (*TLE*) XIX-1: 18-20. O78
- . "Luther: An Enduring Influence on Education." (*TLE*) XIX-3: 20-22. F79
- . "New Ideas for 'Kiddy Lit'." (*TLE*) XV-2: 21-23. D74
- . "Children's Religious Books: Join the Rat Race." (*TLE*) XV-4: 20-21. My75
- . "Keeping Up With C.S. Lewis." (*TLE*) XVI-1: 21-22. O75
- . "More Keeping Up With C.S. Lewis." (*TLE*) XVI-2: 19. D75
- . "What Are You Doing, Jean Fritz?" (*TLE*) XVII-2: 19-20. D76
- . "Children's Book Showcase." (*TLE*) XVII-4: 20-22. My77
- . "Fantastic Journeys of George MacDonald." (*TLE*) XVIII-1: 20-22. O77
- . "Web of African Tales, The." (*TLE*) XVIII-2: 20-22. D77
- . "Literature Propaganda Censorship." (*TLE*) XVIII-4: 19-21. My78
- . "Evaluation—Can We Do It?" (*TLE*) XX-1: 22-23. O79
- . "Know Your Writers." (*TLE*) XX-2: 20-21. D79
- . "The Best of Book Bonanza." (*TLE*) XX-3: 23. F80
- . "The American Revolutionaries (Milton Meltzer)." (*TLE*) XXIX-3: 72. F89
- . "A Survey Regarding Teacher Graduates of Martin Luther College." (*TLE*) XXXVIII-3: 75-90 F98
- Jacobson, Gerald + Maass. "Children's Book Showcase." (*TLE*) XVII-4: 20-22. My77
- Jacobson, Gerald + Zimmer. "The Relationships of Adolescent Literature." (*TLE*) XXXVI-2: 57-59 D95
- Jahns, Thad. "Keep Your Child's Love Tank Filled." (LP). VIII-3: 12-13 Jan/Feb01
- . "Not Just Some Old Customs." (LP) XI-2: 28-29 Nov/Dec 03.
- Janke, Martin. "Let's Put Away the Crayons!" (*TLE*) VII-2: 16-18. D66
- Janke, Mary. "Helping the Retarded Child." (*TLE*) IX-4: 18-19. My69
- Janke, Paul. "The Pastor and the Child." (PCE) III-2: 23-24. Fa91
- . "Relationships in the Sunday School (3): The Pastor and the C." (PL) IV-1: 45-46 Fa95
- Janke, Philip. "Troubles With Our Youth Groups?" (*TLE*) IX-1: 15-18. O68
- . "Church's Curriculum Centers on Christ, The." (*TLE*) VI-1: 16-18. O65
- . "Our Part-Time 'Mission Arms'—Are They as Strong ... Could." (*TLE*) VI-3: 14-15. F66
- . "What Spiritual Gifts Should a Sunday School Teacher Seek...." (*TLE*) VII-1: 19-21. O66
- . "For Entertainment Only?" (*TLE*) VII-3: 12-14. F67
- . "Take Another Look at 'Confirmation' in Your Church." (*TLE*) VIII-1: 10-12. O67
- . "Qualifications for Religion Instructors in Secondary Schools." (*TLE*) XVI-1: 11-13. O75
- . "Church's Curriculum Centers on Christ, The." (*TLE*) XXV-4: 4-7. My85
- Janke, Richard. "Peace." (*LSB*) XIII-2: 1-2. D42
- . "Professional Ethics of a Lutheran Teacher (1)." (*LSB*) XVI-2: 3-6. D45
- . "Professional Ethics of a Lutheran Teacher (2)." (*LSB*) XVI-3: 3-5. F46
- Jantz, Arvin. "Is Good Penmanship Important Today?" (*TLE*) II-4: 6-7. My62
- Jaspersen, Jason. "Fine Arts in Lutheran Education." (*TLE*) XLIII-2: 50-56 D02.
- Jeseritz, Rudolph. "Track Meet that's Different, A." (*TLE*) XIX-3: 23-24. F79
- Jeske, John. "Jochebed and You." (*TLE*) I-1: 1. O60
- . "Our Duty Toward Mother Eve's Children." (*TLE*) I-2: 1. D60
- . "What Manner of Love!" (*TLE*) I-3: 1. F61
- . "What Kind of Workmen are We?" (*TLE*) I-4: 1. My61
- . "Let Down Your Net Anyway!" (*TLE*) II-1: 1. O61
- . "Thy Speech Bewrayeth Thee." (*TLE*) II-3: 1. F62
- . "The Savior Wants Your Donkey." (*TLE*) II-4: 1. My62
- Jeske, Mark. "Why Johnny Doesn't Go to Church." (*TLE*) XXIII-1: 12-15. O82
- . "And What of the Sunday School Anyway?" (*TLE*) XXIII-2: 21-24. D82
- . "Happy Birthday, Dr. Luther." (*TLE*) XXIII-3: 5-7. F83
- . "Using the Hymnal as a Teaching Tool." (*TLE*) XXIII-4: 15-18. My83
- . "Some Notes on Adult Instruction and Confirmation." (*TLE*) XXIV-2: 2-5. D83
- . "Summer's Dilemma: To Teach or Not to Teach." (*TLE*) XXIV-4: 17-18. My84
- . "Ten Hard Questions About Baptism." (*TLE*) XXV-2: 9-12. D84
- Jindra, Michael. "Aliens Among Us." (LP)V-3: 6-8 Jan/Feb 1998
- Johannsen, Hans. "35mm Slides in the Classroom." (*TLE*) III-1: 6-7. O62
- Johne, Harold. "Professional Growth — The Wondrous Dimension." (*TLE*) XXIII-4: 2-3. My83
- Johnson, John. "What Loving Youth Is Really All About." (PL) III-2: 19-20 Sp95
- . "Handling Stress." (*LL*). IX-1: 14-17 Fa(LL)00
- Johnson, Lucille. "Improving Study Habits." (*TLE*) II-3: 22.

F62

- Juern, John. "Obedience and the Heart." (LP) III-1: 14. Sep/Oct 95
- . "Responsibility and Kids." (LP) III-2: 5. Nov/Dec 95
- . "Trust and the Parent/Child Relationship." (LP) III-3: 5. Jan/Feb 96
- . "A Word on Behalf of Spankings." (LP) III-4: 6. Mar/Apr 96
- . "Honesty Doesn't Come Naturally." (LP) III-5: 5. May/June 96
- . "The Compulsive Liar." (LP) III-6: 4. July/Aug 96
- . "Teacher-Husband-Dad." (TLE) XXI-2: 21-22. D80
- . "Multidisciplinary Team Evaluation." (TLE) XXI-3: 18-19. F81
- . "Controlling Anger." (LP) IV-6: 7 July/Aug 1997
- . "ADHD: A Treatment, not a Cure." (LP) V-1: 4 Sep/Oct 1997
- . "Tips for Teaching Problem Solving." (LP) V-2: 2 Nov/Dec 1997
- . "When Parents are Afraid to Parent." (LP) V-3: 4 Jan/Feb 1998
- . "Time-outs Promote Instruction." (LP) V-4: 6 Mar/April 1998
- . "Do Your Children Know You Love Them?" (LP) V-5: 4 May/June 1998
- . "Order in the Family." (LP) V-6: 4 July/Aug 98
- . "Home Help for Parents." (LP) VI-1: 4 Sep/Oct 98
- . "You do the Crime—You do the Time." (LP) VI-2: 4 Nov/Dec 98
- . "A Sense of Learning." (LP) VI-3: 4 Jan/Feb 99
- . "Teach Them to Say No." (LP) VI-4: 4 March/April 99
- . "Beyond having a Bad Day." (LP) VI-5: 4 May/June 99
- . "Lying--A Natural Response." (LP). VIII-1: 5 Sep/Oct 00
- . "Neuroscience: It's not just for brain surgeons anymore." (LP). VIII-6: 5 July/Aug 01
- . "Please, Mommy, Don't Go." (LP). VIII-5: 7 May/June 01
- . "Ready, Sit, Go!" (LP). VII-2: 4 Nov/Dec 99
- . "Teach God's Love--even in times of loss." (LP). VI-6: 4 Ju/Au 99
- . "The Bed-Wetting Nightmare." (LP). VII-3: 5 Jan/Feb 00
- . "Christian Discipline is...." (LP). VIII-4: 5 Mar/Apr 01
- . "Kids With An Attitude." (LP). VII-6: 5 July/Aug 00
- . "Birth-order--does it matter?" (LP). VIII-3: 4 Jan/Feb 01
- . "Narcissism." (LP). VIII-2: 4 Nov/Dec 00
- . "Th-th-that's all normal folks." (LP). VII-5: 5 May/June 00
- . "Spiritually Strong. Emotionally Healthy." (LP). VII-4: 5 Mar/Apr 00
- . "Compliant/defiant siblings.." (LP) IX-2: 4 Nov/Dec 01
- . "Homework Headaches." (LP) X-1: 23 Sep/Oct 02
- . "Making Memory Work Easier." (LP) IX-1: 5 Sep/Oct 01
- . "Teaching Kindness." (LP) IX-5: 5 Ma/Ju 02
- . "The Second Time Around." (LP) IX-4: 7 Ma/Ap 02

- . "By Both Sound and Sight." (LP) XI-5: 23 May/June 04.
- . "A Successful Christian Dad." (LP) X-6: 23 Ju/Au 03.
- . "Anger Management for Kids." (LP) X-5: 23 My/Ju 03.
- . "Divorce and Kids." (LP) XI-3: 23 Jan/Feb 04.
- . "Spanking." (LP) XI-1: 23 Sep/Oct 03.
- . "Stop Yelling." (LP) X-2: 23 Nov/Dec 02.
- . "The Challenges of Change." (LP) XI-6: 23 July/Aug 04.
- . "Time for Bed." (LP) XI-2: 23 Nov/Dec 03.
- . "Time for Sex Ed in the Home." (LP) XI-4: 23 Mar/Apr 04.
- Juern, John et al. "Book Reviews." (TLE) XXV-1: 7-8. O84
- Jung, George. "The Place of Love in Discipline." (TLE) III-2: 22. D62
- Kaesmeyer, Harris. "Outside Reading in the Lutheran High School." (TLE) VII-3: 10-11. F67
- Kaiser, Paul. "As Long as They are Reading." (TLE). XLI-2: 36-37 D00
- Kaiser, Ruth. "Spread the Good News." (TLE) XXIV-3: 7-8. F84
- Kaniess, Gerhard. "A Look at Luther High School Athletics." (TLE) II-1: 10-11. O61
- Kapler, David. "Gospel Communicators: Share, Witness, Proclaim." (PL) IV-1: 35-36 Fa95
- Kassulke, Lorraine. "The Value of a Kindergarten in Our Schools." (LSB) XXVII-3: 4-11. F57
- Kassulke, Paul. "Why Has Music Lost Its Forte?" (TLE) XXI-2: 15-17. D80
- . "Lutherans for Life—Lutherans for Love." (TLE) XXVI-4: 8-10. My86
- Kastens Gerald. "Family Materials: What Shall We Choose." (TLE) XXXI-4: 81-84. My91
- . "A Family-Centered Approach in Ministry to Youth and Children." (PL) I-1: 17-18. N92
- . "Sunday School Tomorrow." (LL) VI-6: 26-27 Su98
- . "Family-Based Youth Ministry." (LL) VII-1: 8-10 Fa98
- . "Retaining Our Youth." (TLE) XXXIX-1: 15-19 O98
- . "Next Summer, Say Yes to Vacation Bible School." (PL) II-1: 32-33 Fa93
- . "Scriptural Perspectives in the New Religion Curriculum." (PL) II-2: 4-5, 9 Sp94
- . "Life and Bible Times: Finding Freshness." (PL) III-1: 24-25 Fa94
- . "WELS Sunday Schools: 'Let the Children Come.'." (PL) III-2: 16-17 Sp95
- . "And I Can Go and Tell." (PL) III-3: 24-25 Su95
- . "WELS Kids Connection: Video Link to Kids." (PL) III-3: 48-49 Su95
- . "Bring Jesus' Birth to Life." (PL) IV-3: 39-40 Su96
- . "Sunday School Teachers Share God's Promise." (PL) IV-3: 4-5 Su96
- . "Using Mentors With a New Teacher." (TLE) XXVIII-2: 37-38. D87
- . "You Haven't Changed a Bit!." (TLE) XXVIII-3: 63-64. F88
- . "Improving Parent Involvement in the Educational Pro-

- gram of Your School.” (*TLE*) XXVIII-4: 78-81. My88
- . “The Coordinated Religion Curriculum—Checking the Course.” (*TLE*) XXXIII-4: 121-122. My93
- . “Sunday School is Everybody’s Business.” (*TLE*) XXXVII-2: 42-45 D96
- . “The Great Go-Mission in Manitowoc.” (*LL*), V-1:25
- . “Smooth Sailing or Aimless Drifting.” (*LL*)V-4:18-20 Su97
- . “Christ-Light: A Beacon for Children and Families.” (*LL*)VI-2:4-7 Wi98
- . “Sunday School—Who’s Going to Do Something About It?” (*TLE*)XXXVIII-2:61-64 D97
- . “For Tomorrow.” (*LL*). VIII-3 4-7 Sp00
- . “Strong Roots for Tender Shoots.” (*TLE*). XI-4: 112-114 My00
- . “Stop Fighting.” (LP). VIII-5: 12-13 May/Jun01
- . “Construction Zone: Building Strong Christian Families.” (*TLE*). XI-1: 21-24 O99
- . “The Sunday School Story.” (*LL*). VIII-2:24-25 Wi00
- . “Any Day but Sunday.” (*LL*)VI-3:18-19 Sp98
- . “Confirmation Instruction—Smooth Sailing or Foundering?” (*TLE*) XLII-3:82-84 F01
- . “You Haven’t Changed a Bit.” (*LL*) X-2: 4-7 Wi02
- . “Rooted in Faith—Let Them Soar.” (LP) XI-5: 28-30 May/Jun04.
- Kehl, David. “Families--Effective Evangelism Committees.” (*LL*) XII-4: 24-25 Su04.
- Kehl, Eulora. “Christmas Gifts for Mothers.” (*TLE*) I-2: 4-5. D60
- Kehl, Leslie. “Recognizing the Influence of Modern Trends on Child’s Character.” (*LSB*) XXV-1: 4-8. O54
- Kehl, Dave. “Involving Women.” (*LL*). XIII-1: 20-21 Fa04.
- . “Get Out of the Classroom!” (*LL*). XIII-2 26-27 Wi05.
- Keibel, Armin. “Teachers Worth Twice as Much.” (*TLE*) III-1: 1. O62
- . “The Good Spell.” (*TLE*) III-2: 1. D62
- . “Resort to Gethsemane.” (*TLE*) III-3: 1. F63
- . “Parting Blessing.” (*TLE*) III-4: 1. My63
- . “Parable for Pedagogues.” (*TLE*) IV-1: 1. O63
- . “Advent Stewards.” (*TLE*) IV-2: 1. D63
- . “Patrick the Sinner.” (*TLE*) IV-3: 1. F64
- . “Fishers of Men.” (*TLE*) IV-4: 1. My64
- . “Honor Your Predecessor.” (*TLE*) IX-1: 1. O68
- . “Counsellor.” (*TLE*) IX-2: 1. D68
- . “The Greater Emancipator.” (*TLE*) IX-3: 1. F69
- . “Jesus’ Next of Kin.” (*TLE*) IX-4: 1. My69
- . “Call Me Christian.” (*TLE*) V-1: 1. O64
- . “Wise Men.” (*TLE*) V-2: 1. D64
- . “Luther’s Wedding Ring.” (*TLE*) V-3: 1. F65
- . “Abide With Us.” (*TLE*) V-4: 1. My65
- . “The Big Difference.” (*TLE*) VI-1: 1. O65
- . “Great Assignment, The.” (*TLE*) VI-1: 22-23. O65
- . “Loyalty to Leaders.” (*TLE*) VI-2: 1. D65
- . “Being Wise.” (*TLE*) VI-3: 1. F66
- . “Feed My Lambs.” (*TLE*) VI-4: 1. My66
- . “Treasured Teacher.” (*TLE*) VII-1: 1. O66
- . “Angels for a Priest.” (*TLE*) VII-2: 1. D66
- . “Apollos for Self-Improvement.” (*TLE*) VII-3: 1. F67
- . “What It Means to be a Lutheran Teacher.” (*TLE*) VII-4: 1. My67
- . “Grown-Up Teachers.” (*TLE*) VIII-1: 1. O67
- . “A Child-Like Faith.” (*TLE*) VIII-2: 1. D67
- . “How Precious the Child in the Sight of the Lord.” (*TLE*) VIII-4: 1. My68
- . “God’s Whole Armor.” (*TLE*) X-1: 1. O69
- . “Alpha/Omega.” (*TLE*) X-2: 1. D69
- . “He Has Risen!” (*TLE*) X-3: 1. F70
- . “Ichthus.” (*TLE*) X-4: 1. My70
- . “Tree Stakes.” (*TLE*) XI-1: 1. O70
- . “The Shepherds’ Angel.” (*TLE*) XI-2: 1. D70
- . “The Celtic Cross.” (*TLE*) XI-3: 1. F71
- . “Phylacteries.” (*TLE*) XI-4: 1. My71
- . “Sowing the Seed.” (*TLE*) XII-1: 1. O71
- . “The Name Above Every Name.” (*TLE*) XII-2: 1. D71
- . “The Crux of the Cross.” (*TLE*) XII-3: 1. F72
- . “The Christian Olympics.” (*TLE*) XII-4: 1. My72
- . “The Beginning of Wisdom.” (*TLE*) XIII-1: 1. O72
- . “Forbid Them Not!” (*TLE*) XIII-2: 1. D72
- . “Gem of the Reformation.” (*TLE*) XIII-3: 1. F73
- . “Our Teacher the Holy Spirit.” (*TLE*) XIII-4: 1. My73
- . “It’s Not Hereditary.” (*TLE*) XIV-1: 1. O73
- . “Gold and Frankincense and Myrrh.” (*TLE*) XIV-2: 1. D73
- . “Never Be Discouraged!” (*TLE*) XIV-3: 1. F74
- . “Why Go To a Lutheran High School?” (*TLE*) XIV-4: 1. My74
- . “Reformation Angel.” (*TLE*) XIX-1: 1. O78
- . “Christmas Past, Christmas Present.” (*TLE*) XIX-2: 1. D78
- . “Does It Show?” (*TLE*) XIX-3: 1. F79
- . “Keep the Faith!” (*TLE*) XIX-4: 1. My79
- . “God’s High Regard for Parenthood.” (*TLE*) XV-1: 1. O74
- . “New Minds for Old.” (*TLE*) XV-2: 1. D74
- . “Fit For the Kingdom.” (*TLE*) XV-3: 1. F75
- . “Jesus’ Confirmation Gift.” (*TLE*) XV-4: 1. My75
- . “Christian Citizens.” (*TLE*) XVI-1: 1. O75
- . “Jesus’ First Recorded Word.” (*TLE*) XVI-2: 1. D75
- . “Necessity of the Cross.” (*TLE*) XVI-3: 1. F76
- . “Pass It On!” (*TLE*) XVI-4: 1. My76
- . “Wanted, Harvesters.” (*TLE*) XVII-1: 1. O76
- . “Opening God’s Christmas Gift.” (*TLE*) XVII-2: 1. O76
- . “Faith Alone.” (*TLE*) XVII-3: 1. F77
- . “The Holy Christian Olive Tree.” (*TLE*) XVII-4: 1. My77
- . “Run Your Best!” (*TLE*) XVIII-1: 1. O77
- . “A Lamp for Our Feed.” (*TLE*) XVIII-2: 1. D77
- . “Better Than Honey.” (*TLE*) XVIII-3: 1. F78
- . “75 Years of Lutheran High Schools.” (*TLE*) XVIII-4: 1. My78

- Keller, Kevin. "Leadership Effectiveness in the WELS Elementary Schools." (*TLE*) XXXVI-2: 52-56 D95
- Kellogg, Timoth., "Becoming Liturgical." (*LL*) V-1: 18-20 Fa97
- Kelm, Daniel. "Open Bibles and Open Hearts—Close the Back Door." (PL) I-2: 20-21 Sp93
- Kelm, Paul. "Cure-all or Quick-fix." (PL) I-1: 4-5. N92
- . "Training Christians for Ministry." (PCE) II-2: 28-29. Fa90
- . "Don't Babysit Your Youth Group." (*TLE*) XVI-4: 14-16. My76
- . "Generations." (*LL*) VI-4: 4-8 Su98
- . "Four Principles." (*LL*) IX-4: 4-7 Su01
- . "What to Do?" (*LL*) XI-3: 8-10 Sp03.
- . "Smaller Churches?" (*LL*). XIII-2 8-10 Wi05.
- Keup, Louis. "The Merits and Demerits of Homework." (*LSB*) XIV-3: 3-4. F44
- . "Report-to-Parents Day." (*LSB*) XXII-3: 6. F52
- Kieselhorst, Jerome, et al. "The ALHS Development Director." (*TLE*) XXXII-4: 100-107. My92
- Kiessling, Elmer. "Lutheran High School Teacher's Approach to Literature, The." (*TLE*) III-3: 8-10. F63
- . "With Luther in the Classroom at Christmas." (*TLE*) V-2: 2-3. D64
- . "Luther and Christian Education (1)." (*LSB*) XXVII-1: 3-4. O56
- . "Luther and Christian Education (2)." (*LSB*) XXVII-2: 3-4. D56
- . "Luther and Christian Education (3)." (*LSB*) XXVII-3: 3-4. F57
- . "A Graduation Address." (*LSB*) XXVII-4: 1-3. My57
- . "Luther and Christian Education." (*LSB*) XXVII-4: 3-4. My57
- Kiecker, James. "What Do You Do for a Living." (*LL*) XII-2: 4-8 Wi04.
- Kieta, Geoffrey. "It's All Spanish to Me." (*TLE*) XXXIV-3: 68-71. F94
- . "Breaking Through the Filters." (*TLE*) XXXV-1: 4 O94
- . "Our Daily Struggle With Sin." (*TLE*) XXXVII-4: 100-106 M97
- . "On Being Stewards of Our Old Age." (*TLE*) XXXIX-1: 10-12 O98
- . "WELS Words: Legalism." (*TLE*) XLII-4: 125-128 My01
- . "WELS Words: Stewardship." (*TLE*) XLII-3: 85-87 F01
- . "Why do Terrible Things Happen?" (*TLE*) XLII-2: 44-48 D01
- . "Evangelism." (*TLE*) XLIII-3: 116-119 My03.
- . "Fellowship." (*TLE*) XLIII-2: 46-49 D02.
- Kimbrough, Ray. "African-American History: Who Needs It?" (LP) V-3: 5 Jan/Feb98
- Kirk, Daniel. "Me—a Pastor?" (*TLE*) XVIII-3: 23-24. F78
- Kirk, Daniel + Bode. "High School TV Production: A Conversation." (*TLE*) XVII-1: 16-19. O76
- Kirschke, E. "Wheat: A Type Study in Geography for Upper Grades." (*LSB*) X-2: 4-5. D39
- Kirschke, William. "Who Should Solicit Children for our Christian Day School." (*LSB*) IX-3: 1-2. F39
- . "Book Review: Reading Readiness, Harrison." (*LSB*) XVIII-1: 6-7. O47
- Kissinger, Mrs. Donald. "St. John's First Graders Learned to Read Via i/t/a." (*TLE*) VII-1: 13-15. O66
- Kissinger, Wally. "Whole Language: A Personal Venture." (*TLE*) XXXI-4: 92-96. My91
- Klatt, H.R. "Thoughts on Education." (*TLE*) II-1: 20. O61
- . "Book Chat." (*LSB*) II-3: 5. J32
- . "Book Chat." (*LSB*) III-1: 6. O32
- . "Seeking the Major Premise Through the Ages." (*TLE*) III-3: 17-18. F63
- . "An Approach to Foreign Affairs Since 1900 From a Christian .." (*TLE*) V-3: 20-22. F65
- . "A First Lesson in 'European Background'." (*LSB*) VI-2: 2-3. D35
- . "Educational Changes in our Present Changing World." (*LSB*) VIII-3: 2-5. F37
- . "Be Not Conformed to This World." (*LSB*) X-2: 2-3. D39
- . "Be Not Conformed to this World in Teaching the Social Studies." (*LSB*) X-3: 2-3. F40
- . "An Appraisal of Educational Principles in the Light of Scrip." (*LSB*) XIV-4: 2-4. My44
- . "Thoughts on Education." (*LSB*) XIV-4: 3. My44
- . "Does Geography Influence History?" (*LSB*) XIX-1: 2-3. O48
- . "What is New in Professional Books." (*LSB*) XIX-2: 2-3. D48
- . "Importance of Teaching World History Background in the Grades." (*LSB*) XVI-4: 5-6. My46
- . "An Evaluation of the World's Philosophy of Education." (*LSB*) XVIII-4: 5-6. My48
- . "What's New in Professional Books." (*LSB*) XXI-3: 7-8. F51
- . "Introduction to the Crusades." (*LSB*) XXVI-1: 4. O55
- Klatt, Harold. "Beginning Part Singing." (*LSB*) XII-2: 4-5. D41
- . "Prominent Educators Since the Days of Luther: Comenius." (*LSB*) XVI-1: 3. O45
- Klein, Elsa. "Hello...Goodbye, Miss Young." (*TLE*) XIII-1: 4-5. O72
- Klemp, Douglas. "The Sunday School Superintendent and the Child." (PCE) III-2: 25-26. Fa91
- . "Relationships in the Sunday School (5): The Sunday School Superintendent." (PL) IV-3: 9-10 Su96
- Klindworth, Robert & M Me. "Technology Opportunity—the Virtual School." (PL) IV-3: 22-23 Su96
- Klockziem, Roger. "Cooperative Learning: An Alternative." (PL) I-3: 33,35 Su93
- . "Cooperative Learning." (*TLE*) XXX-4: 87-91. My90
- Kluball, Gary. "The Worship Card—A User-Friendly Worship Guide." (PL) III-1: 12-13 Fa94
- . "You Are the World's Bible." (*LL*) XII-2: 20-21 Wi04.

- Klug, Ronald. "Round and Round in Reading." (*TLE*) VI-3: 8-9. F66
- Kluender, Joel. "Confessors." (*TLE*). XLVII-1: 20-23. O06.
- Klusmeyer, Tom. "Strengthening Faith at Summer Camp." (PL) II-1: 37-38 Fa93
- Knapp, Ken. "Enough Evidence?" (*LL*) X:1 24-25 Fa01
- Knief, Marilyn. "Don't Wait Your Turn to Learn." (*TLE*) XIV-2: 7-8. D73
- Knippel, Darrell. "Practical Suggestions for Faculty In-Service Programs." (*TLE*) XVI-2: 8-10. D75
- . "Practical Suggestions for Faculty In-Service Programs." (*TLE*) XVI-3: 11-13. F76
- Knippel, Naomi. "We Held a Friendship Fair." (PL) III-2: 41 Sp95
- Knippel, Robert. "Caution: Worship May be Habit-forming." (LP)V-2:6-7 Nov/Dec 1997
- . "Out With the Truth." (LP). VII-3: 6-8 Jan/Feb00
- . "How You Say It is as Important as What you Say." (LP) IX-5: 6-7 Ma/Ju 02
- . "Surviving a Midlife Crisis." (*LL*) XII-3: 8-10 Sp04.
- Knoke, Arline. "Science in the Primary Grades (1)." (*LSB*) XXII-1: 2-5. O51
- . "Science in the Primary Grades (2)." (*LSB*) XXII-2: 2-4. D51
- Knutson, Craig. "Prepare to Answer!" (PL) II-1: 42,45 Fa93
- Koch, H.A. "Report of the Gausewitz Catechism Revision Committee." (*LSB*) XIX-2: 6-7. D48
- . "Revision of the Gausewitz Catechism." (*LSB*) XIX-4: 4-8. My49
- . "Gleanings From the Field of Prayer." (*LSB*) XVIII-2: 1-3. D47
- . "Revision of the Gausewitz Catechism." (*LSB*) XX-2: n.p. D49
- . "Revision of the Gausewitz Catechism." (*LSB*) XX-3: n.p. F50
- . "Revision of the Gausewitz Catechism." (*LSB*) XX-4: n.p. My50
- . "Revision of the Gausewitz Catechism." (*LSB*) XXI-1: n.p. O50
- . "Revision of the Gausewitz Catechism." (*LSB*) XXI-4: n.p. My51
- . "Revision of the Gausewitz Catechism." (*LSB*) XXII-2: n.p. D51
- . "Revision of the Gausewitz Catechism." (*LSB*) XXII-3: n.p. F52
- . "Revision of the Gausewitz Catechism." (*LSB*) XXII-4: n.p. My52
- . "Revision of the Gausewitz Catechism." (*LSB*) XXIII-1: n.p. O52
- . "Revision of the Gausewitz Catechism." (*LSB*) XXIII-2: n.p. D52
- . "Revision of the Gausewitz Catechism." (*LSB*) XXIII-3: n.p. F53
- . "Revision of the Gausewitz Catechism." (*LSB*) XXIII-4: 5-11. My53
- . "Revision of the Gausewitz Catechism." (*LSB*) XXIV-1: 5-10. O53
- Koch, Thomas. "Joy in Ministry." (*LL*) XI-1: 8-10 Fa02.
- Koehler, Edward. "Cooperation of Home and School." (*TLE*) XIX-1: 5-6. O78
- Koeller, Ardis. "Putting Self Into Self-discipline." (LP) III-6: 9-10. July/Aug 96
- . "Chores." (LP) III-5: 12-13. May/June
- . "Starting Special Education in Your Classroom." (*TLE*) XXV-1: 2-3. O84
- . "Assisting Parents in Helping ... Children With Special Needs." (*TLE*) XXVI-1: 12-14. O85
- . "Special Needs Children: In the Mainstream of God's Love." (*TLE*) XXX-2: 39-43. D89
- . "Included in God's Family." (*LL*) VII-1 28-29 Fa98
- Koelpin, Arnold. "Luther, As Father and Teacher (1)." (PL) III-2: 4-9 Sp95
- . "Luther, as Teacher (2)." (PL) III-3: 4-7,11 Su95
- . "Reformation Studies in the Upper Grades." (*TLE*) VII-4: 17-19. My67
- . "Luther's Catechisms: Brickbats and Plaudits." (*TLE*) XIX-4: 21-23. My79
- . "Luther Lands — Then and Now." (*TLE*) XXIII-3: 8-11. F83
- . "Luther's Wittenberg." (*TLE*) XXIII-4: 22-24. My83
- . "The Christian Teacher's Understanding of Prayer." (*TLE*) XXVIII-1: 5-9. O87
- . "From Infancy." (*TLE*) XXXVI-3: 89-90 F96
- . "The Dual Role: Luther, as Educator (3)." (PL) IV-1: 4-8 Fa95
- Koelpin, John. "Strong Worship." (PL) IV-3: 32 Su96
- Koeninger, L. "The Gospel as the Means of Sanctification." (*LSB*) VIII-2: 1-2. D37
- . "The Gospel as the Means of Sanctification (conclusion)." (*LSB*) VIII-3: 1-2. F37
- . "Whose is the Child?" (*LSB*) XXI-4: 1-2. My51
- Koeninger, Ruth. "A Unit on Teeth." (*LSB*) XVI-1: 4. O45
- Koeplin, David + Raddatz. "Evangelism Program in a Lutheran High School, An." (*TLE*) XXIV-3: 8-10. F84
- Koeplin, Kurt. "The Mission Festival." (*TLE*) V-1: 18-20. O64
- Koepsell, G.A. "Discipline in the Classroom." (*LSB*) XV-3: 1-3. F45
- Koepsell, Markus. "Making Our Societies Effective Part-Time Agencies." (*TLE*) XI-3: 20-22. F71
- Koester, A.H. "Good Housekeeping in the School." (*LSB*) XXIV-3: 3-4. F54
- . "What Makes a Lutheran School a Christian Day School." (*LSB*) XXX-3: 1-4. F60
- Koester, Robert. "Tonight's Meeting Was Worth Attending." (PL) IV-1: 51 Fa95
- . "Technology and Bible Study." (*LL*) X-3:22-23 Sp02
- Koestler, Arlen. "A Step Update from DMLC." (*TLE*) XXXII-3: 68-71. F92
- Kolander, David. "Being Told What to Do' Deliberating on

- a Divine Call." (*TLE*). XLVI-1: 9-13. O05.
- Kolander, Donald. "Looking for Opportunities." (*LL*) XI-3: 26-27 Sp03.
- Kolander, John. "For Want of a Nail." (*LP*) VI-1: 10-11 Sep/Oct98
- . "Continuing Education: No Longer an Option for Lutheran Educators." (*TLE*). XL-2: 48-51 D99
- . "2000 is here now what?" (*LP*). VII-3:12-13 Jan/Feb00
- . "Are We Now What We Were Then?" (*LP*). VIII-1: 10-11 Sep/Oct00
- . "Our World of War." (*LP*) XI-1: 6-8 Sep/Oct 03.
- Kolander, Jonathan. "Everyone Welcome." (*LL*) XI-2: 22-23 Wi03.
- Kolander, Kenneth. "Sunday School and the Christmas Service, The." (*TLE*) XIV-2: 14-15. D73
- Kom, Reinhart. "Direct Bible Study in the Sunday School." (*TLE*) XX-2: 7-8. D79
- Komschlies, Jacqui. "Where's the Warning Label for Harry Potter?" (*LP*). VIII-2: 6-8 Nov/Dec00
- . "Five Things I Want for My Children." (*LP*) XI-6: 6-8 July/Aug04.
- Konell, Cheryl. "Letter from Naples, Italy." (*LL*) V-2:24-25 Wi97
- Kovach, John. "Generation to Generation." (*PL*) IV-2: 33-34 Sp96
- Korthals, James. "Lawyers, Doctors, Plumbers, and Pastors." (*LL*) XI-4: 8-10 Su03.
- Koschnitzke, Gary. "Raising Funds Outside." (*LL*). IX-3:28-29 Sp01
- Kovaciny, Roger. "Start a Tape Ministry for \$150." (*TLE*) XXII-2: 7-10. D81
- Kowalke, E.E. "Christian Education." (*LSB*) X-4: 1-2. My40
- . "Commencement Address, Northwestern College." (*LSB*) XV-4: 2-3. My45
- . "Separation of Church and State." (*LSB*) XVII-2: 4-6. D46
- Kramer, Paul. "Symbolism in Literature." (*TLE*) XI-1: 24. O70
- Krahn, Richard. "Raised From the Dead." (*LL*) XI-1: 4-7 Fa02.
- Kratz, Emily. "A Full Kitchen Table." (*LP*) IX-3: 4-5 Jan/Feb
- . "A Faithful Soldier." (*LP*) X-3: 26-27 Ja/Fe 03.
- . "Where is Jesus." (*LP*) X-4: 26-27 Ma/Ap 03.
- Kraus, Karl. "Miracle of Love, The." (*TLE*) XVII-2: 2-4. D76
- . "The Miracle of Love." (*LSB*) XXII-2: 1-2. D51
- Krause, Carol. "Multi-Graded Classroom." (*TLE*) XVI-2: 6-7. D75
- Krause, E.F. "What Information Should the Pupil Gather From a Map?" (*LSB*) XIII-3: 4-5. F43
- Krause, Richard. "Teaching the Catechism at Home." (*TLE*) XXXV-4: 100-103 My95
- . "Lutheran Lite?" (*LL*). VIII-1: 8-10 Fa99
- Krause, Robert. "WELS Lutheran High Schools: A Brief History." (*TLE*) XVIII-4: 22-23. My78
- Kremer, Kenneth. "Wellspring: A New Resource for the Spiritual Home." (*PL*) I-2: 48-49 Sp93
- . "Consider Weekly Services for the Children." (*PL*) III-3: 32 Su95
- . "How to Build a Family Altar." (*LP*) III-5: 15. May/June 96
- . "Exploring Parent and Teacher Expectations." (*TLE*) XXIX-1: 10-12. O88
- . "Exploding Myths Regarding Parental Discipline." (*TLE*) XXIX-4: 79-81. My89
- . "Survival Quarter (part 1)." (*TLE*) XXV-1: 19-22. O84
- . "Survival Quarter (part 2)." (*TLE*) XXV-2: 12-16. D84
- . "Home Worship." (*LL*) VII-1 26-27 Fa98
- . "Afterthoughts to a Career of Teaching Composition." (*TLE*). XL-1: 18-20 O99
- . "In Search of Family." (*LP*) IX-2: 14-15 Nov/Dec 01
- . "Shaping Jars of Clay." (*LL*) XII-2: 22-23 Wi04.
- . "Signs of the Times." (*TLE*) XLIII-1: 11-15 O02.
- . "Teaching Bible Truth to a Digital General." (*TLE*). XLIV-2: 38-51. D03.
- . "The Writing Teacher." (*TLE*). XLV-2: 41-47. D04.
- Kremmer, I. "Manuscript Writing." (*LSB*) VII-4: 2-4. My37
- Kremer, Marlis. "If Toys Talked." (*LP*) VI-2: 7-8 Nov/Dec98
- Kresnicka, Judith. "Instruments in the Worship Service." (*TLE*) XVII-2: 16-18. D76
- Kretzmann, Carol. "Would You Teach in a Public School?" (*TLE*) II-4: 2-3. My62
- Kretzmann, P. E. "What We Owe Our Children." (*ELS*). VI: 2,4 Fa99
- Krieger, Freddy. "Our Personal Bible Seminar." (*PL*) I-3: 22 Su93
- Kriewall, Thomas. "The Sum and Substance of Arithmetic." (*TLE*) I-3: 6-8. F61
- . "Auto-Instructional Devices." (*TLE*) III-4: 8-9. My63
- Kruck, Keith. "Planning a Year of Bible Classes." (*PCE*) II-4: 56-57. Sp91
- . "Success and V.B.S." (*TLE*) X-4: 12-14. My70
- . "The Value of Bible Classes." (*TLE*) XXVIII-4: 12-14. O87
- . "Special Preparation." (*LL*). VIII-1: 24-25 Fa99
- Krueger, Daniel, et al. "The ALHS Development Director." (*TLE*) XXXII-4: 100-107. My92
- Krueger, David. "Youth Rally—Worthwhile of Worthless?, The." (*TLE*) XVIII-4: 5-7. My78
- Krueger, Robert. "Shaking Hands." (*LL*). VIII-4: 24-25 Su00
- . "Investing in Worship." (*LL*). IX-3:22-23 Sp01
- Krueger, Terri. "Teaching Children-Many Gifts/Many Possibilities." (*TLE*). XLVI-2: 57-59.
- Krueger, Thomas. "Calling a Teacher." (*PL*) III-1: 21,23 Fa94
- Krueger, William. "The Christian Teacher and His Person." (*TLE*) IV-4: 10-11. My64
- . "Indoctrination: The Father of Individualism." (*TLE*)

- V-1: 2-3. O64
- . “Master Teacher’s Purpose, The.” (*TLE*) VI-4: 21-22. My66
- . “The Use of God’s Word in Discipline.” (*LSB*) XXVIII-1: 2-5. O57
- . “The Bugaboo of Certification.” (*LSB*) XXX-3: 4-6. F60
- Krug, Faith. “Parental Involvement in Early Childhood Education.” (*TLE*) XXXVI-4: 103-107 M96
- . “Different Ways of Looking at the World: Projects in Early Childhood.” (*TLE*) XXXVII-3: 87-89 F97
- Krug, Gary. “Countdown: Planning Early.” (*PCE*) I-3: 36-37. Wi89
- . “Christian Look at Rock, A (1).” (*TLE*) XXVI-1: 2-5. O85
- . “Christian Look at Rock, A (2).” (*TLE*) XXVI-2: 11-13. D85
- . “Christian Look at Rock, A (3).” (*TLE*) XXVI-3: 2-6. F86
- . “Christian Look at Rock, A (4).” (*TLE*) XXVI-4: 1-4. My86
- . “Equipping Children for Evangelism (1).” (*TLE*) XXVI-II-1: 10-14. O87
- . “Equipping Children for Evangelism (2).” (*TLE*) XXVI-II-2: 33-36. D87
- Kruschel, Peter. “All in the Preparation.” (*LP*). VII-2: 10-11 Nov/Dec 99
- Kruse, Merlyn. “Critical Behaviors of the Classroom Teacher.” (*TLE*) XXIX-1: 13-17. O88
- Kuehl, David. “Church Library Promotion? Spell it B-O-O-K-S!” (*PL*) II-1: 49 Fa93
- Kuenn, Thomas. “Holy Scripture: Don’t Leave Home Without It!” (*PL*) II-3: 22 Su94
- Kugler, Robert. “Energy Crisis, The—A Call to Stewardship.” (*TLE*) XXI-2: 22-23. D80
- Kujath, Mentor. “What’s New in Audio-Visual?” (*TLE*) I-2: 13-14. D60
- . “Audio-Visuals for Part-Time Agencies.” (*TLE*) XIII-2: 22-24. D72
- Kuske, David. “A Bible Study on New Worship Forms.” (*PL*) I-3: 15-16 Su93
- . “The Religion Curriculum Project: What are its Goals?” (*PCE*) III-3: 42-43. Wi91
- . “The 9th and 10th Commandments; Another View.” (*TLE*) XXXI-2: 37-40. D90
- . “Joy in Teaching—Teaching Joy.” (*LL*) V-2:20-23 Wi97
- Kuske, Lynn. “The Invisible Friend.” (*LP*). VIII-3:14 Jan/Feb01
- Kuster, Thomas. “Jesus’ Remarkable Claim of Divine Privileges.” (*TLE*) XXIX-3: 61-62. F89
- . “The Final Fifth of God’s Will.” (*TLE*) XXX-3: 58-63. F90
- . “If I Could Get on the Internet...” (*ELS*) I-3:6 Su98
- LaDue, Dorothy. “Outdoor Worship at Pilgrim.” (*PL*) IV-2: 20-21 Sp96
- LaGrow, George. “Managing a Teen Bible Class.” (*PL*) II-3: 42-44 Su94
- . “Pastor or Fail: Research vs Practice.” (*TLE*) XXXI-4: 88-91. My91
- . “A Parent’s Dilemma: Law or Gospel.” (*LP*) VI:1 12-13 Sep/Oct98
- . “Reach Out with Schools.” (*LL*) XI-2: 26-27 Wi03.
- Laitinen, Wayne. “Help an Elephant Tread Water.” (*LL*) V-4:8-9 Su97
- Lange, Lyle. “Sing a Song of Salvation!” (*TLE*) XXIV-3: 4-6. F84
- . “Evangelism Emphasis at MLC.” (*TLE*). XLVI-1: 21-22. O05.
- Lanphear, Gerald. “Teacher’s Role In Diagnosing Reading Problems.” (*TLE*) XII-4: 7-9. My72
- . “Try the Newspaper.” (*TLE*) XVI-4: 7-9. My76
- Lanphear, Joan. “Suggestions For Early Reading Instruction.” (*TLE*) X-3: 4-5. F70
- . “Making More Use of the Overhead Projector.” (*TLE*) XVII-3: 10-11. F77
- Larsen, Elizabeth. “Adding a Floor to the Bird House: A Model for ... Composition.” (*TLE*) XXI-2: 17-20. D80
- Lau, H. “Jeremiah 9, 23-24.” (*LSB*) XII-2: 5-6. D41
- Lauersdorf, Richard. “When Is a Person Confirmed?” (*PCE*) II-3: 44-45. Wi90
- Lawrenz, Carl. “Living By God’s Christmas Gift.” (*LSB*) XV-2: 1-2. D44
- . “Dangers ...Introducing Religious Instruction in Pub Schools(1).” (*LSB*) XVI-3: 1-2. F46
- . “Dangers ...Introducing Religious Instruction in Pub Schools(2).” (*LSB*) XVI-4: 1-2. My46
- . “Practical Application of the Fifth Commandment.” (*LSB*) XXIX-2: 3-6. D58
- Lawrenz, John. “Youth Ministry in 4-D.” (*TLE*) XVI-3: 17-19. F76
- Lawrenz, Phoebe. “Learning a Second Language.” (*TLE*) XXXV-3: 68-71 F95
- Lehmann, Richard. “A Few Thoughts on Youth Ministry.” (*TLE*) XXIV-1: 13-16. O83
- Lehninger, Jeanne. “Children, Pets, and Power.” (*LP*) III-4: 8-9. Mar/Apr 96
- Leinwander, Bernice. “Experienced Primary Teacher Begins Another Year, The.” (*TLE*) IX-1: 8. O68
- Lemke, Carol. “The Cardboard Storm.” (*LP*). VIII-6: 12 July/Aug01
- . “When God Smiles.” (*LP*) IX-3: 8-9 Jan/Feb 02
- . “Roadkill Lasagna.” (*LP*) X-6: 8 Ju/Au 03.
- Lemke, Dick. “Run, Jump, and Hop for Elementary School Students.” (*TLE*) XXXVI-4: 108-109 M96
- Lenz, Gregory. “Parish Nurse Helps Many People.” (*PL*) IV-2: 14-15 Sp96
- . “Early Evening VBS.” (*PCE*) I-4: 56-57. Sp90
- Lenz, Mark. “Stewardship is For Adults, Right?” (*TLE*) XXXI-2: 41-46. D90
- . “Misfits in the Ministry.” (*TLE*) XXXII-2: 35. D91

- . "The Importance of Involving Parents." (*TLE*) XXXI-II-2: 35. D92
- . "Are You Prejudicing Children?" (*TLE*) XXXIV-2: 35 D93
- . "Lessons in Education From the Romans and Greeks." (*TLE*) XXXV-2: 35 D94
- . "Tertullian, Gregory, and Fundamentalism." (*TLE*) XXXVI-2: 35 D95
- . "Cartoon Theology." (*TLE*) XXXVII-2: 35 D96
- . "The Ugly Pupil." (*TLE*) XXXIX-2: 35 D98
- . "Forward (not froward)." (*TLE*). XL-2: 35 D99
- . "Anfectung." (*TLE*). XLI-2: 35 D00
- . "Teaching Children to Pray the Catechism." (*TLE*) XLII-2:35 D01
- . "A Golden Chain Around the Neck." (*TLE*) XLIII-2: 35 D02.
- . "If Not I...Who?" (*TLE*). XLV-2: 55. D04. Teaching.
- . "Luther's Lesser Known Theses." (*TLE*). XLVII-2: 40-44. D06.
- Leonard, Bob. "Witnessing for Jesus—It's What Gives Us Joy." (*LL*) V-2:25-26 Wi97
- Lequia, Joseph. "Winning or Participating (1)." (*TLE*) XXI-3: 8-10. F81
- . "Winning or Participating (2)." (*TLE*) XXI-4: 8-9. My81
- Leverence, Kenneth. "Introducing Modern Mathematics Into Our Schools." (*TLE*) III-4: 12-14. My63
- Levorson, Leroy et al. "The Lutheran Church in North American Life." (*TLE*) XX-4: 21. My80
- Leyrer, Philip. "Where Training Begins." (*LL*) VII-2: 8-10 Wi99
- . "Just One Step." (*LP*) VI-5: 10-11 May/June99
- . "Truths About Tones." (*TLE*). XLI-3: 67 F01
- . "Conversation: The Gentle Art." (*LP*) X-6: 24 Ju/Au 03.
- . "Dare We Hope?" (*LP*) XI-3: 30-31 Jan/Feb04.
- . "Who We Are." (*TLE*) XLIII-3: 67 F03.
- . "Pondering a Paradox." (*TLE*). XLVII-3: 67. F07.
- . "At the Center." (*TLE*). XLV-3: 67. F05.
- . "Excellence in the Marketplace." (*TLE*). XLIV-3: 67. F03.
- . "Flag-wrapping." (*TLE*). XLVI-4: 99. M06.
- . "Me and the Spirit." (*TLE*). XLIV-4: 120-122, M04.
- . "Two Innocent Questions About Teacher Training in the WELS." (*TLE*). XLVI-3: 92-96. F06.
- Limmer, Bill. "Reaching Treasured Souls." (*LL*). XIII-2 22-23 Wi05.
- Lindemann, Daron. "PC2: PC in a PC World." (*LL*) X-3:8-10 Sp02
- Livingston, Karen, Bonnie Pufahl, Shirleen Maertz, and Edward Meyer. "Sing and Make Music: Classroom Teachers." (*TLE*). XLI-4: 117-120 My01
- Lober, Arnold. "How to Teach Poetry." (*LSB*) XII-3: 3-4. Mr42
- Loe, Daniel. "The Lutheran Teacher Helps Families." (*TLE*). XLI-3: 80-81 F01
- Loeck, Joyce. "Beating Boredom and the Midwinter Blahs." (*LP*) III-3: 4,13. Jan/Feb 96
- . "The Lutheran Elementary School in Crisis." (*TLE*) XXXIV-1: 16-18 O93
- . "Teaching Faith in Action." (*TLE*) XXXIV-2: 57-61 D93
- Loftin, R.Bowen. "The Board of Education: Overseeing and Oversight." (*PCE*) I-1: 8-10. Su89
- . "Congregational Administration of Educational Programs & Agencies." (*PCE*) I-2: 28-29. Fa89
- . "Recruiting the Reluctant." (*PCE*) III-3: 46-47. Wi91
- Loftin, R.Bowin. "A Different Bible Class." (*PCE*) II-2: 20-21. Fa90
- . "The Melting Pot Classroom: LES and Public School Children." (*PCE*) II-3: 46-47. Wi90
- Loomis, Cheryl. "The Developing Brain." (*TLE*) XXXVIII-4:103-106 My98
- . "The Read-Aloud Parent." (*LP*) VI-3: 10-11 Jan/Feb 99
- . "Summer Renewal." (*TLE*) XXXIX-4: 99 M99
- . "Merely Child's Play." (*LP*). VII-2: 12-13 Nov/Dec 99
- . "Obstacles or Opportunities." (*TLE*). XL-4: 99 My00
- . "Professionalism." (*TLE*). XLI-4: 99 My01
- . "A Matter of Choice." (*TLE*) XLII-4:99 My01
- . "MI: What Does it Mean to Our Children?" (*LP*) IX-6:12-13 July/Aug02
- . "School Readiness." (*TLE*) XLII-1:6-9 O01
- . "Assessment and Accountability." (*TLE*) XLIII-3: 99 My03.
- . "School Bullying." (*TLE*) XLIII-2: 41-43 D02.
- Loomis, Cheryl, John Nolte and Edward Meyer. "Sing and Make Music: College Instructors." (*TLE*). XLI-4: 110-111 My01
- . "Education through the Ages: Early Childhood Education." (*TLE*). XLVI-1: 3. O05.
- . "Encouraging Behaviors." (*TLE*). XLVII-4: 99. M07.
- . "Forward and Back." (*TLE*). XLV-1:3. O04. History.
- . "Patience and Understanding." (*TLE*). XLIV-4: 99, M04.
- . "The Importance of Family Involvement in Becoming Literate." (*TLE*). XLV-4: 115-122. M05.
- Lopahs, Martin. "This is the Year My Johnny Gets Confirmed." (*TLE*) XXX-3: 69-71. F90
- . "The Other Side of the Academic Coin." (*TLE*) XXXII-1: 22-24. O91
- Loppnow, L. and L. Collyard. "Full-day v. Half-day Kindergarten." (*LP*). VIII-4: 15 Mar/Apr01
- . "What To Teach and Why." (*LP*). VIII-1: 14 Sep/Oct00
- . "Sex Education--Whose Responsibility?" (*LP*). VIII-3:15 Jan/Feb01
- Lorfeld, Dale. "Loyal to Christ—On the Godly Road to Christian Adulthood." (*PL*) III-2: 22-23 Sp95
- Luehring, William. "Purposeful Devotions." (*LSB*) XXIX-2: 1-3. D58
- Lueneburg, Kurt. "The Pastor as Coach." (*LL*) XI-4: 4-7 Su03.
- Luetke, Julie. "His Little Lambs Were All Smiles." (*PL*) II-3: 45-46 Su94

- Lyon, H. Curtis. "What Kind of Counseling Was That Again?" (PL) II-3: 47-48 Su94
- Maas, Gale. "Suggested Procedures at Sunday School Teachers' Meetings." (TLE) IV-1: 12-13. O63
- Maass, Julie + Jacobson. "Children's Book Showcase." (TLE) XVII-4: 20-22. My77
- Madson, Margaret. "Reading in Kindergarten." (TLE) XV-3: 4-5. F75
- . "The Place of Play." (TLE) XXIII-1: 20-21. O82
- Magiera, Corrine. "Let the Adventure Begin." (LP). VI-6: 5-6: Ju/Au99
- . "This Little Gospel Light of Mine. (LP). VIII-4: 10-11 Mar/Apr01
- . "SH. We're in Church!" (LP). VII-2: 14-15 Nov/Dec 99
- Mahnke, Jon. "Never Forget the Gospel." (PCE) I-2: 30. Fa89
- . "The Child as a Missionary." (LSB) XXIX-1: 1-6. O58
- . "VBS Plan Now! Enjoy It Later!" (TLE) XXVI-3: 6-9. F86
- Mahnke, Lee. "Wonderful World of Kindergarten, The." (TLE) III-1: 4-5. O62
- Maier, Walter. "Sex Education." (TLE) X-2: 8-9. D69
- Malnes, Dave. "Small-Parish Youth Ministry." (LL). VIII-4: 28-29 Su2000
- Mantey, Curtis "The School, the Teacher, and Evangelism." (ELS)1:1 3,8 Fa97
- . "The School, the Teacher, and Evangelism." (ELS) I-1: 3,8 Fall 97
- Manthey, Elsa. "Music and the Learning Disabled Child." (TLE) XXIX-3: 69-70. F89
- . "Thank You, Lord, for Your Gift." (TLE) XLIII-2: 44-45 D02.
- Manthey, Frederick. "Educational Influence of Journalism." (TLE) IX-2: 10-11. D68
- . "Improving Our Gift of Speech." (TLE) IX-3: 11-12. F69
- . "The Teacher Studies the Value of Voluntary and Involuntary Attention." (LSB) XVI-2: 3-4. D45
- Manthey, Irene. "Social Studies in the Kindergarten." (TLE) I-4: 8-9. My61
- Manthey, Muriel. "Art Appreciation." (TLE) XIII-3: 4-5. F73
- Manthey, W.H. "Professional Growth of the CDS Teacher: A Duty & a Necessity." (LSB) V-4: 2. Mr35
- . "Conference Address." (LSB) VII-4: 1-2. My37
- . "Are You Present?" (LSB) XIII-3: 5-6. F43
- Marggraf, Sara. "What Science Means to Me." (TLE). XLVII-4: 126. M07.
- Markgraf, Dale. "Building Word Power." (TLE) IX-2: 6-7. D68
- . "Home-visits: A First Step in Developing Good Parent/Teacher Committee." (TLE) XXX-4: 76-80. My90
- . "Meeting the Needs of Physically Disabled Students." (TLE). XL-4: 108-111 My00
- Markgraf, Dale, Ron Zahn, and Edward Meyer. "Sing and Make Music: Elementary School Principals." (TLE). XLI-4: 114-116 My01
- Marowsky, Lawrence. "Service Playing: Funerals." (TLE) XVII-3: 19-20. F77
- Marozick, Laurie. "Early Childhood Corner." (ELS) V: 6 Sp99
- Marten, Kathleen. "Have You Tried This?" (TLE) XV-1: 10. O74
- Martens, Gene. "Contemporary Music in the Classroom." (TLE) XXXV-4: 113-117 My95
- . "Disciplining Without Shame: Discipling Without Shame." (TLE) XXXIX-3: 68-76 F99
- . "Crossing Generations." (LL). VII-3: 4-7 Sp99
- . "Shame on You!" (LP). VII-5: 10-11 May/June00
- Martin, Carla. "Cyber Stewards." (LL). IX-3:24-25 Sp01
- Martin, G. "Remedial Reading." (LSB) XII-4: 3-4. My42
- . "Grammar in the Grades." (LSB) XIII-2: 5-6. D42
- . "Theories of Science in the Light of Scripture (1)." (LSB) XVII-3: 6-7. F47
- . "Theories of Science in the Light of Scripture (2)." (LSB) XVII-4: 3-6. My47
- Martin, Kelly. "Chris and Me." (LP) IX-4: 4-6 Ma/Ap 02
- Mattek, John. "Involve Youth in the Worship Service." (PL) I-3: 39 Su93
- . "Children's Church Attendance." (TLE) II-3: 8-9. F62
- Mattek, John. "Lessons from the Past." (TLE). XLV-1:18-23. O04.
- Maurice, Brian. "Saxon Math: Fire and Ice." (TLE). XLV-4: 123-125. M05.
- McFarland, A. Elizabeth. "What is New in Professional Books." (LSB) XXII-3: 3. F52
- McKenney, Bruce. "Your Child and Day Care." (LP) III-1: 6-7. Sep/Oct 95
- . "Team Ministry—One Pastor's View." (PL) I-2: 43-44 Sp93
- McLean, Irma. "Instruction: Curriculum Focus of Teacher Choice." (TLE) XXXII-4: 99. My92
- . "Called to Teach...A Unique Calling." (TLE) XXXIII-4: 99. My93
- . "Sowers of the WORD." (TLE) XXXIV-4: 99 My94
- . "Teachers: Know Your Students." (TLE) XXXV-4: 99 My95
- . "Through Children's Eyes." (TLE) XXXVI-4: 99 M96
- . "Teachers: "Share the Promise"." (TLE) XXXVII-4: 99 M97
- McQuire, Sarah. "The Lafayette Charter School and Martin Luther College Partnership." (TLE). XLVI-2: 49-51. D05.
- Medendorp, John. "Shaping of a Soul, The." (TLE) X-4: 20. My70
- Meier, William + Adickes. "Make Every Effort to Keep the Unity (Eph 4:3)." (TLE) XXIV-2: 12-13. D83
- Melendy, Carla. "Classroom Assessments." (TLE) XLIII-3: 102-109 My03.
- Melendy, Carla; Susan Haar. "Profiles of Ministry: The East

- Coast." (*TLE*) XXXII-4: 123-125. My92
- Melso, John. "Assimilation: A Key to Locking the Back Door." (*PL*) II-3: 26 Su94
- Mendell, Rachel. An Overview of Home Education. (*TLE*). XL-1: 9-11 O99
- . "Home School Support Groups." (*TLE*). XLI-2: 40-42 D00
- . "How Lutheran School Teachers Can Assist Home Schooling Parents." (*TLE*). XL-2: 40-43 D99
- . "The Conference." (*TLE*). XL-4: 122-125 My00
- . "Teaching Shakespeare." (*TLE*). XLI-3: 77-79 F01
- . "Homenetters: A Unique WELS Online Community." (*TLE*) XLIII-3: 120-123 My03.
- . "Resources for Teachers and Schools." (*TLE*) XLIII-1: 28-31 O02.
- Menk, Darin. "Survey of Music Education in the WELS." (*TLE*) XLII-3:75-81 F01
- Menk, Rolland. "Authentic Assessment in the Language Arts." (*TLE*) XXXV-2: 36-39 D94
- . "Whole Language—An Overview." (*TLE*) XXXII-1: 15-21. O91
- Menke, Normal. "We Beheld His Glory." (*TLE*) II-2: 1. D61
- Merseeth, Karen. "Music in the Christian Day School Classroom." (*ELS*) I-1:2 Fa97
- . "Music in the Christian Day School Classroom." (*ELS*) I-1:2
- Merten, Stephen. "Spontaneous Combustion and Very Long-Range Lesson Plans." (*TLE*). XLV-3: 94-96. F05.
- Meyer, Edward. "Aids for Teaching Music." (*TLE*) XIII-3: 10-11. F73
- . "Junior Choirs." (*TLE*) XIX-1: 15-17. O78
- . "Challenge of Teaching Music in Contemporary American Culture." (*TLE*) XIX-3: 17-19. F79
- . "Music-Making in the Service of the Gospel." (*TLE*) XV-1: 21-23. O74
- . "Teachers Speak on Music in the Upper Grades." (*TLE*) XV-2: 15-18. D74
- . "Behavioral Objectives for School Music." (*TLE*) XV-3: 13-15. F75
- . "Have You Joined the Kodaly Bandwagon?" (*TLE*) XVII-4: 17-19. M77
- . "Critical Periods in the Musical Development of Children." (*TLE*) XVIII-1: 17-19. O77
- . "Development of the Adolescent Male's Singing Voice, The." (*TLE*) XVIII-2: 17-19. D77
- . "Opinions: The Christian Day School Band Program." (*TLE*) XVIII-4: 15-18. My78
- . "Small Choirs." (*TLE*) XX-4: 18-20. My80
- . "Equipping Musicians for the Church." (*TLE*) XXI-4: 16-19. My81
- . "Research Into the Problem of Monotonism." (*TLE*) XXII-1: 21-23. O81
- . "United States Copyright Law: Implications for the Church Musician." (*TLE*) XXIII-2: 13-15. D82
- . "Exciting Times in Church Music." (*TLE*) XXIV-1: 9-11. O83
- . "Sing a Song of Salvation." (*TLE*) XXIV-4: 11-14. My84
- . "Using the Resources That are There: Creating a Concertato." (*TLE*) XXV-1: 13-18. O84
- . "Elementary School-Sponsored Piano Instruction." (*TLE*) XXV-2: 18-20. D84
- . "Quotations from Twenty-Five Years of TLE Music Articles." (*TLE*) XXV-4: 12-15. My85
- . "Music in Early Childhood." (*TLE*) XXVII-1: 14-17. O86
- . "What Does Church Music Communicate?" (*TLE*) XXVIII-4: 14-17. O87
- . "Sing and Make Music." (*TLE*). XLI-4: 101-105 My01
- . Sing and Make Music: Introduction." (*TLE*). XLI-4: 100 My01
- Meyer, Edward & Wayne Wagner. "The New WELS Elementary School Music Curriculum." (*TLE*) XXXIII-1: 26-32. O92
- Meyer, F.W. "Launch Out Into the Deep." (*LSB*) IX-1: 1-2. S38
- . "We Have the Answer." (*LSB*) IX-3: 6. F39
- . "For the New School Year." (*LSB*) VII-1: 2-3. S36
- . "The Master Calleth For Thee." (*LSB*) X-1: 1-2. S39
- . "The Lutheran School Bulletin 1930-1940." (*LSB*) X-4: 3-4. My40
- . "Do You Believe What You Say?" (*LSB*) XI-1: 3-4. S40
- . "Defense." (*LSB*) XI-2: 2-3. D40
- . "Serving God's Happy People." (*TLE*) XI-3: 2-4. F71
- . "Scripture Versus Philosophy." (*LSB*) XI-4: 3. My41
- . "Be Thou Our Guide." (*LSB*) XII-1: 3. S41
- . "Observations." (*LSB*) XII-1: 4. S41
- . "The Religious Philosophy of the Public School Education." (*LSB*) XII-2: 3. D41
- . "The Close of the School Year." (*LSB*) XII-4: 3. My42
- . "What Shall We Talk About?" (*LSB*) XIII-1: 1-2. S42
- . "The Report Card." (*LSB*) XIII-2: 4-5. D42
- . "A Lesson From Our Times." (*LSB*) XIII-3: 2. F43
- . "The Harvest Truly is Great ... Luke 10,2." (*LSB*) XIII-4: 4. My43
- . "No Change of Viewpoint or Aim." (*LSB*) XIV-1: 2-3. S43
- . "Christian Schools Provide Spiritual Education." (*LSB*) XIV-3: 2-3. F44
- . "My Obligation as a Teacher." (*LSB*) XV-1: 2-3. O44
- . "Today's Youth Problem Calls for Sound Christian Judgment." (*LSB*) XV-3: 3-4. F45
- . "What Shall I Say?" (*LSB*) XVIII-4: 3-4. My48
- Meyer, Henry. "Gleanings From the Field of Prayer." (*LSB*) XVIII-3: 1. F48
- Meyer, Joh P. "Rejoice Because Your Names are Written in Heaven." (*TLE*) IV-3: 2-3. F64
- . "Serving God's Happy People." (*LSB*) XX-1: 1-2. O49
- Meyer, John. "Profiles of Ministry." (*TLE*) XXXII-2: 59-61. D91

- . “Making a Referral for Children With Special Needs.” (*TLE*), XXXVIII-3 72-74 F98
- Meyer, Marie. “Listen to the Lesson.” (*TLE*) XII-2: 4-5. D71
- Meyer, Marietta. “What Are We Doing About Map Study? (1).” (*TLE*) V-3: 4-5. F65
- . “What Are We Doing About Map Study? (2).” (*TLE*) V-4: 4-5. My65
- . “Creativity and Self Expression.” (*TLE*) VII-2: 4-5. D66
- Meyer, Mark & R. Klindworth. “Technology Opportunity—the Virtual School.” (PL) IV-3: 22-23 Su96
- Michael, James. “A Church Organization With a Purpose.” (*TLE*) I-3: 19. F61
- Micheel, John. “Computer Literacy.” (*TLE*) XXII-3: 2-4. F82
- . “Computer Resources.” (*TLE*) XXIII-4: 10-12. My83
- Middendorf, John. “What is a Sentence?” (*TLE*) IV-1: 21. O63
- . “Why Youth are Discouraged From Reading.” (*TLE*). XLI-3: 93-94 F01
- Miller, Brian. “Student-Led Part Conferences 1.” (*TLE*) XLII-2:38-43 D01
- . “Student-Led Part Conferences 2.” (*TLE*) XLII-3:68-74 F01
- Miller, John. “Calm and Hope Beyond the Storm.” (*LP*) VI-5: 6-8 May/June99
- Miller, Raymond. “What Parents Expect of Instructors.” (*TLE*) IX-2: 12-13. D68
- Minch, Jack. “Code Red.” (*TLE*). XLVII-3: 85-86. F07.
- Mischke, Carl. “Spiritual Renewal: Where Does It Begin?” (PCE) I-1: 5. Su89
- . “Grace 125 and Christian Education.” (*TLE*) XV-1: 2-4. O74
- Mischke, Joel. “Physical Education in a Small School.” (*TLE*) XXIV-4: 5-7. My84
- . “What Do You Want to be When You Grow Up?” (LP)V-1:12-13 Sep/Oct 1997
- Mitchell, Robert. “Description in Science.” (*TLE*) XIII-1: 10-11. O72
- Mittelmann, Carla. “Homework Fax at Arizona Lutheran Academy.” (PL) II-3: 30,34 Su94
- Moeller, James. “Principals—Why They Serve.” (PL) IV-1: 41-42 Fa95
- . “Investment, Not a Cost.” (*LL*) XI-4: 22-23 Su03.
- Moeller, Linda. “Do You Look for the Lord? (song).” (PCE) I-3: 42-43. Wi89
- . “Give Thanks To God (Song).” (PCE) II-2: 32. Fa90
- . “No One Loves Me More Than Jesus (Song).” (PCE) II-3: 48. Wi90
- Moldenhauer, Jeanne. “Kindergarten in the Multi-Grade Classroom.” (*TLE*) XV-4: 6-7. My75
- Moldenhauer, Kermit + Gru. “Christian Worship and the Copyright Laws.” (PL) II-2: 32-35 Sp94
- Moldenhauer, Robert. “As I See It.” (*LSB*) XXIII-3: 3-6. F53
- . “Ideas for Art.” (*LSB*) XXIX-1: 8. O58
- . “Art Ideas.” (*LSB*) XXIX-2: 8. D58
- . “Art Ideas.” (*LSB*) XXIX-4: 9-10. My59
- . “Time-Saving Suggestions for the Teacher.” (*LSB*) XXVI-2: 3-5. D55
- . “Ideas for Art.” (*LSB*) XXVIII-3: 7-8. F58
- Mose, Jane. “Include the Developmentally Disabled.” (PL) IV-1: 28-30 Fa95
- . “Parents and Christ-Light.” (*LL*)VI-2:8-10 Wi98
- . “Special Sunday School.” (*LL*). VIII-3: 22-23 Sp00
- . “Ten Myths About Giftedness.” (*TLE*) XLII-2:53-58 D01
- Moskop, A.A. “Safety Education.” (*TLE*) I-1: 8-9. O60
- . “The Handbook.” (*TLE*) II-1: 8-9. O61
- . “House Rules.” (*TLE*) II-2: 6-7. D61
- . “Hobby Show, A.” (*TLE*) II-3: 17. F62
- Mueller, Jean. “My Phonics Cheerleader.” (*TLE*) XI-3: 5-6. F71
- Mueller, Wayne. “Hey, That’s My Brother.” (PL) I-3: 10 Su93
- . “The Fruits are Visible.” (PL) II-1: 21-22 Fa93
- . “If Not Moralizing, What.” (PL) II-1: 40-41 Fa93
- . “Leadership: Rod and Staff.” (PL) II-2: 52 Sp94
- . “The Old One-on-One.” (PL) II-3: 9-10 Su94
- . “The Sunday School Teacher’s Call.” (PCE) II-4: 64. Sp91
- . “A Definition of Lutheran Family Ministry.” (PL) III-1: 5-8 Fa94
- . “Family Ministry: Running in Place.” (PL) IV-1: 16-17 Fa95
- . “Leadership: A Place for Praise.” (PL) IV-1: 52 Fa95
- . “Leadership: Heads Have Ears.” (PL) IV-2: 52 Sp96
- . “Leadership: Power Steering.” (PL) IV-3: 52 Su96
- . “The Sunday School Teacher’s Call.” (PL) IV-3: 6 Su96
- . “Leadership: Look Both Way.” (*LL*)V-1:32 Fa97
- . “Leadership: Adding and Subtractin.” (*LL*)V-2:31 Wi97
- . “Leadership: Plundering the Egyptians.” (*LL*)V-3:30 Sp97
- . “Leadership: One Master.” (*LL*)V-4:32 Su97
- . “Leadership: The Media.” (*LL*)VI-1:32 Fa97
- . “Leadership: Tying the Bible to the Budget.” (*LL*)VI-2:32 Wi98
- . “Leadership: Able to Be Wrong.” (*LL*)VI-3:32 Sp98
- . “Leadership: Top-Down Love.” (*LL*) VI-6:32 Su98
- . “Leadership: Money Talk.” (*LL*) VII-1: 31 Fa98
- . “Leadership: Risk.” (*LL*) VII-2: 32 Wi99
- . “Understanding the Call.” (*LL*). IX-1: 4-7 Fa(LL)00
- . “Wauwatosa Theology: Its Impact on Today’s Ministry.” (*LL*). VIII-2:4-7 Wi00
- . “Leadership: Come as a Child.” (*LL*). VIII-3: 32 Sp00
- . “Leadership: Defeating the Amalekites.” (*LL*). IX-1: 32 Fa(LL)00
- . “Leadership: Forward in Christ.” (*LL*). VIII-2:32 Wi00
- . “Leadership: No Fast Hands.” (*LL*). VII-3: 31 Sp99
- . “Leadership: The driver’s Seat.” (*LL*). IX-3:32 Sp01

- . "Leadership: The Youth Culture." (*LL*). IX-2:32 Win01
- . "Leadership: Willing Worship." (*LL*). VIII-1: 32 Fa99
- . "Leadership: Protect or Pass." (*LL*). VII-4: 32 Su99
- . "The Last Shall be First." (*LL*). VIII-4: 32 Su2000
- . "Leadership: Back to the Future." (*LL*) X:1 32 Fa01
- . "Leadership: Pointing the Weapon." (*LL*) IX-4:32 Su01
- . "The Divine Call: Is It Still the Same?" (*TLE*). XLV-2: 60-62.
- Muetzel, Ronald. "Celebrate Real Presence." (*LL*). VIII-1: 4-7 Fa99
- Mulinix, Michael. "Being Good and Doing Good." (*TLE*) XXIX-2: 33-38. D88
- Mulinix, Tom. "God's Market Plan." (PL) I-3: 9 Su93
- Mundt, William. "So You're the Youth Director! Now What?" (*TLE*) XIX-1: 7-9. O78
- Myers, Dan. "Be a David!" (*LL*). VIII-4: 8-10 Su2000
- Naumann, Oscar. "Religion in the Public Schools." (*TLE*) I-3: 14-15. F61
- . "God's Boundless Love, Our Boundless Joy." (*LSB*) XIV-1: 1-2. D43
- NCTM. "Calculators and the Education of Youth." (*TLE*) XXXV-3: 93-94 F95
- Needham, Dennis. "Improving Parent-Teacher Relationships." (*TLE*) XXIV-2: 19-21. D83
- . "Profiles of Ministry: The Caribbean." (*TLE*) XXXII-3: 72-76. F92
- Neimi, David. "Profiles of Ministry: The Inner City." (*TLE*) XXXII-4: 125-126. My92
- Nell, Christine. "Teaching Children to Witness." (PL) I-2: 38-39 Sp93
- Nelson, Jan. "Making Every Piece Fit." (*LP*) IX-1: 6-8 Sep/Oct 01
- Nelson, Jason. "Fatherhood Revisited." (LP) III-5: 8-9,14. May/June 96
- . "Manners Matter." (LP) III-6: 14-15. July/Aug 96
- . "Confidentiality in Youth Ministry." (PL) IV-3: 15-16 Su96
- . "The Christian Teacher is a First-Level Counselor." (*TLE*) XXIX-1: 4-6. O88
- . "Stir Them to Action." (*TLE*) XXX-1: 12-15. O89
- . "Challenges in Counseling High School Youth." (*TLE*) XXXII-4: 127-128. My92
- . "When You Turn Out the Lights, Is the Party Over?" (*LP*) VI-4: 6-7 March/April99
- . "Lutheran Schools Go." (*LL*). VIII-2:20-21 Wi00
- . "Leading to Consensus." (*LL*) X:1 4-7 Fa01
- . "No Laughing." (*LL*) XI-1: 24-25 Fa02.
- . "Let's Take Our Cues from the Children!" (*LL*). XIII-2 20-21 Wi05.
- Nelson, Joel. "Revitalizing Your Sunday School (1)." (PL) II-2: 6-7 Sp94
- . "Revitalizing Your Sunday School (2)." (PL) II-3: 37-38 Su94
- . "Christian Education During the Summer." (PCE) II-4: 58-59. Sp91
- . "Revitalizing Your Sunday School Part 1." (PCE) III-1: 8-9. Su91
- . "Revitalizing Your Sunday School Part 2." (PCE) III-2: 28-29. Fa91
- . "Revitalizing Your Sunday School Curriculum." (PCE) III-3: 36-37. Wi91
- . "ORLS—A One-room School." (*TLE*) XXVII-2: 2-4. D86
- . "Profiles of Ministry: Family Ministry." (*TLE*) XXXV-1: 17-20 O94
- . Seniors and Schools. (*LL*). IX-2:20-21 Win01
- . "A Team Effort." (*LL*). IX-1: 24-25 Fa(LL)00
- . "Help Wanted." (*LL*). VIII-3: 20-21 Sp00
- . "To My Darling." (LP). VIII-1: 6-7 Sep/Oct00
- . "Anatomy of a Home Visit." (*LL*) X-2: 28-29 Wi 2002 Home
- . "Time to Climb." (*LL*) X-4:26-27 Su02
- . "Come, Join Our Family." (*LL*) XII-1: 24-25 Fa03.
- . "I Can Still Feel Their Hands." (*LL*) XII-4: 18-19 Su04.
- . "Retention or Advancement." (*LL*) XI-2: 8-10 Wi03.
- . "Responding to Why Youth Leave WELS." (*TLE*). XLVII-2: 51-59. D06.
- . "Teach Me to Teach!" (*LL*). XIII-1: 24-25 Fa04.
- Neujahr, Charlene. "Special Education Book Reviews." (*TLE*) XXIV-4: 15-16. My84
- Neuman, Jane. "Early Childhood Writing Experiences." (*TLE*) XXXV-3: 83-85 F95
- Neuman, Kevin. "Evangelism is for Children Too." (PL) III-3: 19,21 Su95
- Neumann, Mark. "High Stakes." (LP). VIII-6: 4-5 July/Aug01
- Ninman, Nancy. "Ask the Experts." (LP)V-4:12-13 Mar/April 1998
- . "A Broken Trust." (LP) VI-4: 12-13 March/April99
- . "Lessons From a Friend." (LP) XI-6: 4-5 July/Aug04.
- Nitz, H.C. "A Christian Teacher's Contribution in the Present Emergency." (*LSB*) XIII-1: 1. S42
- . "God in Our Public School." (*LSB*) XV-2: 3-4. D44
- Nitz, Joel. "Build for Worship." (*LL*) VI-6:24-25 Su98
- Noeldner, Patricia. "Special Needs Inclusion: Is it Best for All?" (*TLE*) XXXVII-4: 122-124 M97
- Nolte, Carl. "Everyone Can Sin." (*LL*)V-2:28-29 Wi97
- Nolte, Carl and Edward Meyer. "Sing and Make Music: NPH." (*TLE*). XLI-4: 108-109 My01
- Nolte, John. "Role of the Lutheran High School in Preparing Musicians for." (*TLE*) XVIII-3: 17-19. F78
- Nolte, Waldemar. "What Music is Good to Use for Christian Worship?" (*TLE*) V-4: 17-18. My65
- Nolting, Paul. "Our Parochial School Teachers." (*LSB*) XIII-4: 5. My43
- . "Closing Sermon of Summer Session, 1956." (*LSB*) XXVII-1: 1-2. O56
- Norwine, Jim. "Are Our Students' Values 'Postmodern'?" (*TLE*). XLVII-4: 102-111. M07.
- O'Connor, Colleen. "Child Care—The Lansing Story." (PL)

- II-1: 23-24 Fa93
- Ohlendorf, Rachel. "Upheaval and the Process of Poetry." (*TLE*). XLI-4: 122-123 My01
- . "Confessions of a Time Thief." (*TLE*) XLII-4:118 My01
- Ohm, Melodie. "Play in Learning" (*TLE*). XLIV-3: 81-87 F04.
- Oldfield, John. "Developing Pride in Your Campus." (*TLE*) XXIII-1: 18-20. O82
- . "Self-study and Accreditation." (*TLE*) XXXVI-2: 44-47 D95
- Olsen, Theodore. "MLC-Yesterday, Today, and Tomorrow: President's Perspective." (*TLE*). XLV-2: 38-40. D04.
- Olson, Lawrence. "Insights on Outreach: Agents for God." (PL) I-1: 34. N92
- . "Insights on Outreach." (PL) I-2: 34,36 Sp93
- . "Outreach Insights: Evangelism and Music." (PL) II-1: 14-15 Fa93
- . "Congregational Staffing for Evangelism." (PL) II-3: 29 Su94
- . "A Primer of Staff Ministry." (*TLE*) XXXIV-3: 72-74. F94
- . "The Baptism of the Children of Nonmembers." (*TLE*) XXXVI-1: 4-7 O95
- . "Culture War on the Home Front." (*LP*) VI-3: 12-14 Jan/Feb 99
- . "Reflections on Team Ministry." (*TLE*) XXXIX-2: 42-47 D98
- Olson, Lawrence + Tullber. "Still Hungry!" (*TLE*) XXVII-1: 3-4. O86
- Olson, Mary. "Parental Involvement: Sowing the Seeds." (PL) I-2: 50-51 Sp93
- . "Parental Involvement: Informing, Involving, and Educating." (PL) II-1: 34-35 Fa93
- . "Parental Involvement: Mission Impossible." (PL) III-2: 10-11 Sp95
- . "Effective Early Childhood Environments." (*TLE*) XXXII-4: 119-122. My92
- Oswald, H.C. "Studies in Lutheran Chorales: Non-Lutheran Chorales." (*TLE*) I-1: 16-17. O60
- . "Studies in Lutheran Chorales (Luther)." (*LSB*) XIX-1: 4-5. O48
- . "Studies in Lutheran Chorales (Luther)." (*LSB*) XIX-2: 4-5. D48
- . "Studies in Lutheran Chorales (Luther)." (*LSB*) XIX-3: 7-8. F49
- . "Studies in Lutheran Chorales (Luther)." (*LSB*) XIX-4: 3-5. My49
- . "Studies in Lutheran Chorales (Luther 1)." (*LSB*) XVIII-1: 2-3. O47
- . "Studies in Lutheran Chorales (Luther 2)." (*LSB*) XVIII-2: 3. D47
- . "Studies in the Lutheran Chorales (Luther 3)." (*LSB*) XVIII-3: 2. F48
- . "Studies in Lutheran Chorales (Contemporaries of Luther 1)." (*LSB*) XVIII-4: 3. My48
- . "Studies in Lutheran Chorales." (*LSB*) XX-1: 4. O49
- . "Studies in Lutheran Chorales." (*LSB*) XX-2: 5-6. D49
- . "Studies in Lutheran Chorales." (*LSB*) XX-3: 4. F50
- . "Studies in the Lutheran Chorales." (*LSB*) XX-4: 5-6. My50
- . "Studies in Lutheran Chorales." (*LSB*) XXI-2: 4-5. D50
- . "Studies in Lutheran Chorales." (*LSB*) XXI-3: 6-7. F51
- . "Studies in the Lutheran Chorales." (*LSB*) XXI-4: 7-8. My51
- . "Studies in Lutheran Chorales." (*LSB*) XXIII-1: 3-4. O52
- . "Studies in Lutheran Chorales." (*LSB*) XXIII-2: 2. D52
- . "Studies in Lutheran Chorales." (*LSB*) XXIII-3: 2-3. F53
- . "Studies in Lutheran Chorales." (*LSB*) XXIV-1: 4,11. O53
- . "Studies in Lutheran Chorales." (*LSB*) XXIV-2: 2-3. D53
- . "Studies in Lutheran Chorales." (*LSB*) XXIV-3: 2-3. F54
- . "Studies in Lutheran Chorales." (*LSB*) XXIX-2: 1. D58
- . "Studies in Lutheran Chorales." (*LSB*) XXIX-3: 2-3. F59
- . "Studies in Lutheran Chorales." (*LSB*) XXV-2: 2-3. D54
- . "Studies in Lutheran Chorales." (*LSB*) XXV-3: 2-3. F55
- . "Studies in Lutheran Chorales." (*LSB*) XXV-4: 2-3. My55
- . "Studies in Lutheran Chorales (Gerhardt)." (*LSB*) XXVI-1: 2. O55
- . "Studies in Lutheran Chorales (Gerhardt)." (*LSB*) XXVI-2: 3. D55
- . "Studies in Lutheran Chorales." (*LSB*) XXVI-3: 2. F56
- . "Studies in Lutheran Chorales (Gerhardt)." (*LSB*) XXVI-4: 4. My56
- . "Studies in Lutheran Chorales (Gerhardt)." (*LSB*) XXVII-1: 3. O56
- . "Studies in Lutheran Chorales (Gerhardt)." (*LSB*) XXVII-2: 2-3. D56
- . "Studies in Lutheran Chorales." (*LSB*) XXVII-3: 2-3. F57
- . "Studies in Lutheran Chorales." (*LSB*) XXVII-4: 3. My57
- . "Studies in Lutheran Chorales (Gerhardt)." (*LSB*) XXVIII-1: 2. O57
- . "Studies in Lutheran Chorales." (*LSB*) XXVIII-2: 1. D57
- . "Studies in Lutheran Chorales (Gerhardt)." (*LSB*) XXVIII-3: 1-2. F58
- . "Studies in Lutheran Chorales (Gerhardt)." (*LSB*) XXVIII-4: 2-3. My58
- . "Studies in Lutheran Chorales." (*LSB*) XXX-1: 2-3. O59
- . "Studies in Lutheran Chorales." (*LSB*) XXX-2: 2-3. D59
- . "Studies in Lutheran Chorales." (*LSB*) XXX-3: 4. F60
- . "Studies in Lutheran Chorales." (*LSB*) XXX-4: 2-3. My60
- Oswald, Kurt. "Professional Libraries in Our Schools." (*TLE*) I-4: 13-14. D61
- . "Books for the Teachers." (*TLE*) II-3: 18-19. F62

- . "Are We Supervising Our Children's Radio Listening Programs?" (*LSB*) XIII-4: 3-4. My43
- Ott, Randall. "Models of Joy." (*LL*) XI-1: 18-19 Fa02.
- Ott, Linda and Dave Ponath. "The Befriending Ministry at Christ Lutheran." (*PL*) I-1: 15-16. N92
- Otto, Joel. "Zing in Our Singing." (*LL*). XIII-1: 26-27Fa04.
- Otto, Karl. "Released-Time Classes." (*TLE*) II-4: 13-15. My62
- Owens, Sarah. "Never Not a Student." (*LL*) XI-4: 24-25 Su03.
- Paap, Irma. "Effective Utilization of the Social Studies Text." (*TLE*) XII-1: 8-9. O71
- . "Practical Teaching Aids for Teaching the Story of God's Love." (*TLE*) XVII-1: 20-22. O76
- . "Motivating with Christian Love and Kindness." (*TLE*) XXVI-2: 1-3. D85
- . "On the Changing Classroom." (*TLE*) XXX-4: 75. My90
- . "The Teacher's Time: The Challenge The Blessing." (*TLE*) XXXI-4: 75. My91
- . "Memory Work in the Primary Grades." (*TLE*) XXXII-2: 44-49. D91
- Palmtag, Gertrude. "The Fires of Christmas." (*TLE*) XXIX-2: 47-48. D88
- Pankow, Erhard. "Lenten Evangelism Program." (*TLE*) VI-2: 15. D65
- Pankow, Gerald. "Help the Disadvantaged Majority." (*TLE*) X-4: 8-9. My70
- Pankow, Richard. "A Little is Better Than Nothing" (*PCE*) III-1: 14-15. Su91
- Panning, Frederick. "Comparing Departmentalization and the Self-Contained Classroom." (*TLE*) VIII-3: 6-7. F68
- Pape, Gordon. "Promoting Creative Writing" (*TLE*) IX-1: 10-11. O68
- Pape, Ronald. "Grouping." (*TLE*) IX-3: 13-16. F69
- . "Take Your Choice." (*TLE*) VI-1: 4-5. O65
- . "Licorice Stick, The." (*TLE*) XI-3: 13-14. F71
- Pape, W.A. "The Playground." (*LSB*) X-1: 2. S39
- . "General Science." (*LSB*) XIII-3: 3-4. F43
- Parlow, John. "How to Involve Parents in Youth Ministry." (*PL*) III-1: 48-50 Fa94
- . "Involving Teens in Worship." (*LL*) V-3: 24-25 Sp97
- . "Be Lutheran." (*LL*) VI-6: 8-10 Su98
- Parsons, Erik. "First Day of 'Real School'." (*TLE*). XLVII-4: 123-125. M07.
- Patterson, Donald. "Leadership: Leading Your Own Family." (*LL*) X-4: 12-14 Su02
- Patterson, Donald and Mary. "Muddy Buddy Races." (*LP*) X-4: 4-5 Ma/Ap 03.
- Paulsen, Eric. "The Internet: World Wide Web in WELS Schools." (*TLE*) XXXVI-3: 71-78 F96
- Paulsen, John. "Resources for Teaching Mathematics." (*TLE*) XIII-4: 12-13. My73
- . "Metric System is Coming, The." (*TLE*) XVI-3: 14-16. F76
- . "Computers in Christian Day School?" (*TLE*) XXIII-1: 15-17. O82
- . "Continuing Education." (*TLE*). XLV-3: 79. F05.
- Paustian, Mark. "Bible Story Evangelism." (*LL*) VI-6: 22-23 Su98
- . "Small is Good." (*LL*). VIII-4: 4-7 Su2000
- Payne, David. "Seven Tips for Better Discussions." (*PL*) I-2: 27-28 Sp93
- . "Hope for the Hectic." (*PL*) I-3: 12-13 Su93
- . "Family Ministry and the Lutheran High School." (*PL*) I-3: 34-35 Su93
- . "The Single-Parent Scene—Helping Teens Cope." (*PL*) III-1: 44-45 Fa94
- . "Idle Time or Idol Time—What is TV Teaching Our Children?" (*PL*) III-2: 48-50 Sp95
- . "The Lutheran High School and Its Role of Service." (*TLE*) XXX-4: 92-95. My90
- Peil, Tyler & Jill. "Friends Become Family." (*LL*) XII-4: 20-21 Su04.
- Peikert, Ruth. "Step One—Readiness." (*TLE*) XVIII-1: 8-9. O77
- Pekrul, William. "A Retrospect on the Elementary School Principalship." (*TLE*) XXXVI-3: 85-88 F96
- Pelzl, David. "Mathematics Education: Past, Present, and Future (Part One)." (*TLE*) XXIX-2: 39-41. D88
- . "Mathematics Education: Past, Present, and Future (Part Two)." (*TLE*) XXIX-3: 58-60. F89
- . "Mathematics Education: Past, Present, and Future (Part Three)." (*TLE*) XXIX-4: 76-78. My89
- . "Book Reviews." (*TLE*) XXVIII-2: 47-48. D87
- . "Book Reviews." (*TLE*) XXVIII-3: 58-59. F88
- . "Calculators for the 1990s." (*TLE*) XXXI-2: 47-48. D90
- . "Authentic Assessment: Mathematics." (*TLE*) XXXIV-3: 86-89. F94
- . "Stop Borrowing." (*TLE*) XXXIV-3: 93. F94
- . "Cooperation or Competition." (*TLE*) XXXIV-4: 107 My94
- . "Cooperation or Singling Out?" (*TLE*) XXXV-1: 25 O94
- . "Midsummer Adventure 1994." (*TLE*) XXXV-1: 28 O94
- Pelzl, Theo. "Suggested Experiments and Projects." (*LSB*) IV-1: 4-5. O33
- . "Book Chat." (*LSB*) IV-1: 5-6. O33
- . "Lost: A Picture." (*LSB*) VI-3: 4. F36
- . "Una Slim." (*LSB*) XIX-3: 4-5. F49
- Perham-Hester, Kathy. "Bedtime Stories About Gramma Sandy." (*LP*) IV-10-11 Sp98
- Perham-Hester, Katherine. "New Life for Others." (*LP*). VII-6: 9 July/Aug 00
- Persons, Steven. "The Covered Bridge and the Covered Classroom." (*TLE*) XX-4: 1. My80
- Petermann, James. "Back to the Basics." (*TLE*) XXIV-2: 10-12. D83
- Petermann, Kurt. "Quo Vadis." (*TLE*) V-3: 2-3. F65

- . "Career Exposure." (*TLE*) XXI-1: 12-13. O80
- . "Absenteeism Syndrome, The." (*TLE*) XXI-2: 8-9. D80
- . "Forcing Adulthood." (*TLE*) XXI-3: 22-24. F81
- . "Bible—A Language Arts Tool, The." (*TLE*) XXI-4: 10-11. My81
- . "Family Devotions - The Tie That Binds." (*TLE*) XXII-1: 10-12. O81
- . "Singing! Are We Losing It?" (*TLE*) XXII-2: 16-18. D81
- . "A Sad Reflection." (*TLE*) XXII-3: 6-7. F82
- . "A Children's Reformation Service." (*TLE*) XXIII-1: 6-8. O82
- . "Reformation Projects." (*TLE*) XXIII-2: 2-4. D82
- . "Up Periscope! What's Happening?" (*TLE*) XXIII-4: 6-8. My83
- . "Secretarial Help: No Longer a Luxury." (*TLE*) XXIV-3: 20-21. F84
- . "Help for Parents." (*TLE*) XXV-3: 16-21. F85
- . "Parental Dropout." (*TLE*) XXVI-4: 15-17. My86
- . "School-Hopping." (*TLE*) XXVII-1: 8-10. O86
- . "Stuck in Tradition." (*TLE*) XXVII-2: 5-7. D86
- . "What's Happening Out There?" (*TLE*) XXVIII-1: 15-16. O87
- Peterson, Jon. "The Lutheran Sec School Choral Program: A Perspective for the 90s." (*TLE*) XXXI-1: 14-18. O90
- Pfeifer, Carrie. "Teaching God's Kaleidoscope." (*TLE*) XXXIV-4: 115-118 My94
- Pfeifer, Gene. "Getting Students to Express Their Faith Through Devotions." (*TLE*) XXXVI-2: 48-51 D95
- Pfeifer, Michael. "Motivation and Interest in the High School Choral Program." (*TLE*) XXI-1: 17-19. O80
- . "Can We Stop the Bleeding?" (*TLE*) XXXIX-4: 110-114 M99
- . "Avoiding Pearl Harbor." (*LL*) IX-4:22-23 Su01 Congregation
- . "The Disappearing Generation." (*LL*) X:1 26-27 Fa01
- Pfotenhauer, Thomas. "Family Altar, The—Let's Revive It." (*TLE*) XV-3: 2-3. F75
- Pieper, Donald. "I Remember My Sunday School Teacher." (*PCE*) III-1: 4-5. Su91
- Piepenbrink, Fred. "Senior VolunteersYour AARP Letter." (*LL*). IX-2:4-7 Win01
- Plath, LeDell. "Reflections on the National Literacy Convention." (*PL*) I-1: 43-44. N92
- . "Just What We Needed." (*PL*) I-2: 41-42 Sp93
- . "Vietnam—Some First Impressions." (*PL*) II-1: 27-28 Fa93
- . "Teacher and Principal Assessment." (*PL*) III-1: 22-23 Fa94
- . "Involve Them All." (*PL*) IV-2: 22-23 Sp96
- . "We Need More Principals." (*PL*) IV-2: 28-29 Sp96
- . "Curriculum Evaluation and Study Pilot Programs." (*TLE*) X-4: 10-11. My70
- . "Twelve-Month Call for All Teachers." (*TLE*) XIII-3: 6-9. F73
- . "Some Major Changes After Forty Years." (*TLE*) XIV-1: 7-9. O73
- . "Identifying, Nurturing, Developing." (*TLE*) XXI-3: 5-7. F81
- . "Funding Lutheran Elementary Schools." (*TLE*) XXIX-3: 52-57. F89
- . "The WELS Calling Process for Teachers." (*TLE*) XXX-3: 64-68. F90
- . "The Team Ministry Program/Teacher and Principal Assessment." (*TLE*) XXXV-3: 72-73 F95
- . "We Need More." (*TLE*) XXXVI-1: 24-27 O95
- . "Filling a Void." (*LL*)V-4:4-7 Su97
- . "Read Mor." (*LL*)VI-1:18-19 Fa97
- . "The WELS Calling Process for Teachers." (*TLE*). XLV-3: 74-79. F05.
- . "WELSSA." (*TLE*). XLIV-4: 115-119, M04.
- Plath, Timothy. "Jack of All Trades: Master of (N)one." (*TLE*) XXXV-3: 86-88 F95
- Plitzuweit, James. "An Orphan Comes of Age." (*PL*) III-3: 30-31 Su95
- Plocher, John. "Introducing the Executive Secretary." (*LSB*) VII-1: 1. S36
- Polzin, Barbara. "Of Wormholes, Dirt Cake, and Other Valuable Stuff." (*LP*). VIII-5: 10-11 May/Jun01
- . "A Place to Flourish." (*LP*) IX-6:15 July/Aug02
- Ponath, Ann. "I see London, I see France, I see..." (*LP*) X-6: 30-31 Ju/Au 03.
- . "My Little Janie." (*LP*) XI-3: 4-5 Jan/Feb04.
- . "On Being Big." (*LP*) X-4: 30 Ma/Ap 03.
- . "Welcome Home." (*LP*) XI-6: 30-31 July/Aug04.
- . "Wonderfully Different." (*LP*) XI-4: 24 Mar/Apr04.
- Ponath, Dave and Linda Ot. "The Befriending Ministry at Christ Lutheran (1)." (*PL*) I-1: 15-16. N92
- Ponath, David. "Lutheran Pioneers—A Part-Time Agency?" (*TLE*) XIV-3: 15-17. F74
- Ponath, David and Linda O. "The Befriending Ministry at Christ Lutheran (2)." (*PL*) I-2: 32-33 Sp93
- Pope, James. "Christian Forget-me-nots?" (*TLE*). XLIV-2: 35. D03.
- . "How Faithful Is Faithful." (*TLE*). XLVI-2:37. D05.
- . "Neither Right Nor Wrong?" (*TLE*). XLVII-1: 3. O06.
- . "Reaching Out With Schools." (*TLE*). XLV-2: 35. D04
- Pope, Reginald. "Work toward Your Objectives." (*PL*) I-2: 10-11. Sp93
- Potratz, Gail. "A Tool for School Improvement." (*LL*) X-3:24-25 Sp02
- Prahl, Herbert. "New Hymnal Dedicatory." (*PL*) II-2: 36 Sp94
- . "How Much?" (*LL*). IX-1: 18-19 Fa(LL)00
- Prange, Joel. "A Palm Sunday Alternative." (*TLE*) XXVIII-2: 31-32. D87
- Prange, Mary. "Service Playing: Wedding Music." (*TLE*) XVII-3: 21-23. F77
- Prange, Paul. "Christian Family Confirmation." (*PL*) II-1: 30-31 Fa93
- . "Worship Christ, the Truth." (*LL*) VI-6:28-29 Su98

- . “What are You Listening To?” (*LL*) XII-4: 4-7 Su04.
- Prange, Peter. “Don’t Forget the Dessert.” (*LL*) XII-3: 18-19 Sp04.
- Price, Jane. “PTC.” (*TLE*) XX-3: 18-19. F80
- . “Comparing Two Methods of Instruction: Traditional Grammar and the Writing Workshop (1).” (*TLE*) XXXIX-3: 80-85 F99
- . “Comparing Two Methods of Instruction: Traditional Grammar and the Writing Workshop (2).” (*TLE*) XXXIX-4: 100-109 M99
- Price, Jim and Carl Ziemer. “The Same in Different Ways.” (*LL*) XII-4: 26-27 Su04.
- Prillwitz, David. “Worship in Small Parishes.” (*LL*). VIII-4: 20-21 Su2000
- Proeber, Kathleen. “Christ’s Love Lives in Little Ones (1).” (*TLE*) XXII-1: 8-10. O81
- . “Christ’s Love Lives in Little Ones (2).” (*TLE*) XXII-2: 14-16. D81
- . “Christ’s Love Lives in Little Ones (3).” (*TLE*) XXII-3: 5-6. F82
- Puhl, Warren. “The Sunday School Superintendent: The Results of a Survey.” (PCE) II-2: 22-23. Fa90
- Quandt, E.F. “John the Baptist.” (*LSB*) X-4: 2-3. My40
- Quandt, Lillian. “Reading Readiness.” (*TLE*) I-3: 4-5. F61
- . “Let’s Make Christmas Gifts.” (*TLE*) X-2: 4-5. D69
- Quandt, Lillian + Schmidt. “Useful Art Projects.” (*TLE*) V-Raabe, Daryl. “Not As I Will.” (*LL*) XII-2: 10-12 Wi04.
- Raabe, James. “Teaching the Liturgy.” (*TLE*) VI-2: 8-9. D65
- . “Teaching the Liturgy: Laying the Foundation.” (*TLE*) VI-3: 4-5. F66
- . “Teaching the Liturgy: Building the Structure.” (*TLE*) VII-1: 7-8. O66
- . “Teaching the Liturgy: Continuing to Build.” (*TLE*) VII-2: 12-13. D66
- . “Room-Mother Program Can Work, A.” (*TLE*) X-3: 8-9. F70
- . “Let’s State our Christian Philosophy.” (*TLE*) XIX-1: 21-22. O78
- . “Fund Management: Avoiding Criticism, Doing What is Right.” (*TLE*) XXXI-4: 85-87. My91
- Raabe, John. “Sunday School Teacher’s Institute, The.” (*TLE*) II-3: 16-17. F62
- . “Does the Christian Training of the Home, School, Church ....” (*LSB*) XV-4: 1-2. My45
- Raabe, Lester. “Our Band Program.” (*TLE*) XIV-3: 22. F74
- Raabe, Peg. “For the Sheer Joy.” (*LL*) XI-1: 22-23 Fa02.
- . “Involved and Busy.” (*LL*) XI-2: 20-21 Wi03. 2: 6-7. D64
- Raasch, Robert. “Principles of Learning: An Overview.” (PCE) I-1: 6-7. Su89
- . “Maintaining Student Interest.” (PCE) I-2: 31. Fa89
- . “Keeping ‘em Active.” (PCE) I-3: 35. Wi89
- . “Planned Progression: Key to an Effective Lesson.” (PCE) I-4: 51. Sp90
- . “Let Your Students do the Teaching.” (PCE) II-1: 3. Su90
- . “Lead Your Students Up the Ladder of Learning” (PCE) II-2: 19. Fa90
- . “Do You Remember?—Teaching Principle #6.” (PCE) II-3: 35. Wi90
- . “Asking the Right Questions.” (PCE) II-4: 62. Sp91
- . “A Taxonomy of Questions: Echoing Questions.” (PCE) III-1: 16. Su91
- . “A Taxonomy of Questions.” (PCE) III-2: 16. Fa91
- . “Evaluating Questions.” (PCE) III-3: 35. Wi91
- Raasch, Charles. “Training Youth to Lead.” (*LL*) X-4:28-29 Su02
- Raasch, Robert. “Let Your Light Shine.” (LP) XI-3: 28-29 Jan/Feb04.
- Raddatz, Darwin. “Wisconsin Evangelical Lutheran Synod: A Good Name for Schultz.” (*TLE*) XIII-1: 23-24. O72
- . “Evangelism Library from San Jose: An Integrated Program on.” (*TLE*) XXIV-3: 12-14. F84
- . “The Minor Prophets Cry to the Christian Teacher Today.” (*TLE*) XXVIII-2: 27-30. D87
- . “An Encouragement to Volunteer for Community Service.” (*TLE*). XLV-1:26-31. O04.
- Raddatz, Darwin + Koeplin. “Evangelism Program in a Lutheran High School.” (*TLE*) XXIV-3: 8-10. F84
- Radloff, James. “Friendship Witnessing...A Way of Life.” (PL) I-3: 50 Su93
- . “Bring a FRAN to Meet Jesus.” (PL) II-2: 22-23 Sp94
- . “We Are Witnesses—but in Different Ways!” (PL) III-1: 34-35 Fa94
- . “Me? A Witness?” (PL) IV-2: 16,18 Sp96
- . “The Best Defense? A Potent Offense!” (PL) IV-3: 41 Su96
- . “The Forgotten P of the Great Commission.” (*LL*)V-1:8-9 Fa97
- . “The Five M’s of the Great Commission.” (*LL*)VI-1:28-29 Fa97
- . “A Mission-Driven Church.” (*LL*). VII-4: 8-10 Su99
- Radloff, Leslie. “Connecting Children and Books.” (*TLE*) XXX-1: 7-11. O89
- Radtke, G. “How Our Christmas Joy Reveals Itself.” (*LSB*) XXV-2: 1-2. D54
- Radtke, Nathan. “Godspeed.” (PCE) I-3: 46. Wi89
- Raether, Carole. “Nature Studies In Winter.” (*TLE*) VII-2: 6-7. D66
- Raether, Dale. “You Want Money for What?!” (PL) I-1: 19-20. N92
- Rahn, James. “Define the Job.” (*TLE*) XXXVI-4: 100-102 M96
- Rainwater, Pearl. “You—and Your Children’s Children.” (LP) IX-6:10-11 July/Aug02
- Rambow, Tim and Steven Thiesfeldt. “Establishing an Observation Bee Hive in the Classroom.” (*TLE*). XLV-4: 109-112. M05.
- Rank, Benjamin. “Knowledge of Modern American Histo-

- ry." (*TLE*). XLI-3: 91-92 F01
- Rank, Thomas. "Scarville Lutheran School." (*ELS*) V: -4 Sp99
- Rains, Tina. "Fading memory, but Not Fading Faith." (*LP*) VI-3: 15 Jan/Feb 99
- Rathke, Ronald. "Prepared to Prepare?" (*TLE*) XIII-3: 19-21. F73
- . "Really Getting Into the Word." (PL) I-1: 7-8. N92
- Rauschke, Armin. "Teacher-Constructed Achievement Tests (1)." (*LSB*) XXII-1: 5-7. O51
- . "Teacher-Constructed Achievement Tests (2)." (*LSB*) XXII-2: 5-6. D51
- . "The Objective of the Lutheran School." (*LSB*) XXII-4: 1-6. My52
- Rebers, Dan. "Study to Worship." (*LL*) V-3: 18-19 Sp97
- Reed, Linda Evenson. "Torn by Divorce." (LP) IV-6: 4-6 July/Aug 1997
- . "Babel of Adolomics?" (*LP*) X-1: 4-5 Sep/Oct 02
- . "The Lies We Believe." (LP) XI-2: 4-5 Nov/Dec 03.
- Reich, Leanne. "A Letter to (New) Teachers." (*TLE*) XLIII-1: 5-10 O02.
- Reinhard, Renee. "A Response." (*TLE*) XXXIX-1: 13-14 O98
- Reim, E. "The Proper Relationship Between Pastor and Teacher." (*LSB*) VI-3: 1-2. F36
- . "Is the Teacher's Call Divine?" (*LSB*) XII-2: 1-2. D41
- Rendahl, Freida. "Sixteen Great Family Science Adventures." (LP) IV-6: 14 July/Aug 1997
- . "When Math Doesn't Add U." (LP) V-2: 1-2 Nov/Dec 1997
- . "Of Mustard Seeds and Lost Sheet." (LP). VIII-6: 14 July/Aug01
- . "Living on the Edge or Living Abundantly." (LP). VII-5: 14-15 May/June00
- . "Lessons From the Rink." (LP) V-4: 7-8 Mar/April 1998
- Retzlaff, David and Roberta. "I do' to a Called Worker." (*TLE*). XLVI-2: 52-54. D05.
- Ricke, Mark. "Guilt is a Good Thing." (LP) IX-3: 10-12 Jan/Feb 02
- . "I Learned It All in Sunday School." (LP) X-3: 28-31 Ja/Fe 03.
- Ricker, Myra. "The Joy of Sunday School." (*LL*). VII-4: 28-29 Su99
- Riediger, Norman. "Planning Your Synod Mission Offering." (PL) I-2: 9. Sp93
- Riege, Irene. "The Voice of Jesus is Calling." (PL) I-2: 29 Sp93
- . "Sign-Interpreted Services." (*LL*). VII-3: 18-19 Sp99
- Riggs, Roger. "Let's Look at the Paperbacks." (*TLE*) I-4: 12-13. D61
- Ring, Alex. "That the Unlearned be Taught." (*ELS*) I-1: 5 Fa97
- . "That the Unlearned be Taught (2)." (*ELS*) I-3: 7 Su98
- . "That the Unlearned be Taught (3)." (*ELS*) V: 5 Sp99
- . "Using the Hymnal in the Classroom." (*ELS*). VII: 7 Sp/Su2000
- . "Using Handbells in School and Church." (*ELS*). VI: 5, 7 Fa99
- . "Advent: A Time of Preparation." (*ELS*). VI 1, 8 Fa99
- Ring, Lester. "Creativity." (*TLE*) I-2: 5-7. D60
- . "Graphic Arts at Our School." (*TLE*) III-1: 10-12. O62
- Ristow, August. "Alternatives to Sunday School." (PL) II-3: 36, 41 Su94
- . "Is Sunday the Best Time for Sunday School?" (PCE) II-3: 38-39. Wi90
- Ristow, Leroy. "Home, High School, and Country." (*TLE*) VI-4: 16-18. My66
- Ristow, Timothy. "Internet use in the Classroom." (*ELS*) V: 7-8 Sp99
- Robbert, Lee. "Jesus Cares Ministry." (*LL*) VI-2: 26-27 Wi98
- . "Hi! I'm Jimmy." (*LL*). VIII-3: 24-25 Sp00
- Roehl, W. Keith. "The Home and Spiritual Renewal." (PCE) I-2: 24-25. Fa89
- Rohda, Dudley. "My Kingdom is Not of This World." (*LSB*) XXIV-1: 1-4. O53
- Rolloff, E. O. "Effective Use of the Basic Teaching Film, The." (*TLE*) I-4: 10-11. D61
- Root, Cheryl. "The Storms of Life." (*TLE*). XLVII-4: 121-122. M07.
- Rosenau, David L. "VBS Handicraft Coordinator." (*TLE*) XXVII-3: 8-9. F87
- Rosenbaum, David. "Somewhere Inside the Rainbow." (*LL*) XII-4: 8-10 Su04.
- . "World Connections." (LP) X-5: 30-31 My/Ju 03.
- Rost, Martin and Denise Luehmann. "Twice the Joy of Christian Service." (*LL*) V-2: 4-7 Wi97
- Roth, Jay. "Time Out for Organized Sports." (LP) III-2: 12-13. Nov/Dec 95
- . "Promoting the Christian Day School." (*TLE*) XII-4: 15-17. My72
- . "School-Needs Fund, The." (*TLE*) XVI-3: 4. F76
- Roth, Michael. "Latino Outreach." (*LL*) XI-3: 24-25 Sp03.
- Roth, Ron. "The Church Needs Authoritative Leaders." (PL) I-1: 50-51. N92
- Rothe, Debbie, Ron Uhlhorn. "Sooo Far Away." (LP). VIII-3: 5 Jan/Feb01
- Ruddat, Rachel. "Worship at Manitowoc Lutheran High School." (PL) II-1: 25-26 Fa93
- Ruege, Paul. "Meaningful Ranking of High School Seniors." (*TLE*) I-2: 10-11. D60
- . "Teaching the Way the Master Taught." (*TLE*) V-1: 10-15. O64
- . "Your Sunday School Teachers Meeting—A Golden Opportunity." (*TLE*) VIII-3: 12-14. F68
- Ruege, Ruth. "Religion and Education in Hong Kong." (*TLE*) V-2: 8-9. D64
- Rude, Larry. "One Teacher's Story." (*ELS*) I-1: 4, 7 Fa97
- . "One Teacher's Story." (*ELS*) I-1: 4, 7 Fall 97
- Rupprecht, Jonathan. "What's Wrong With 'What's Wrong With It?'" (*TLE*) XXXV-1: 12-15 O94

- Russow, Howard. "How Luther Stressed the Importance of Christian Training." (*TLE*) VII-4: 2-3. My67
- Rutschow, David. "The Pastor's Role in Congregation Bible Study." (*PCE*) II-4: 60-61. Sp91
- Rygh, Laurie. "Let's Have Music. (ELS)" V: 2,4 Sp99
- Saar, Ernest W. A. "Effective Youth Ministry, An." (*TLE*) XVIII-3: 5-7. F78
- Satorius, Carl and Miriam. "Singing in the Choir." (*LL*) VII-2: 20-21 Wi99
- Sauer, Alfred v. Rohr. "Lutheran Education in the World Today." (*LSB*) XVIII-3: 2-7. F48
- Sauer, Charlotte. "Spring Flowers for Your Pupils." (*LSB*) XV-4: 4-5. My45
- Sauer, David. "Inexperienced Teacher and the New School Year, The." (*TLE*) IX-1: 9. O68
- Sauer, Theodore. "What Can Be Done to Promote a CDS in Those Congregations Which Have None." (*LSB*) XXII-4: 6-8. My52
- Sawatske, Laurie. "Teaching Children How to Sing" (*PCE*) I-3: 38-39. Wi89
- "Parent's Day for Sunday School." (*PCE*) II-1: 16. Su90
- "Keeping Good Order in the Sunday School Classroom." (*PCE*) III-3: 44-45. Wi91
- Schaefer, James. "Christian Worship and the Common Man." (*PL*) II-1: 10 Fa93
- "Instructing the Adult." (*TLE*) XI-4: 14-16. My71
- Schafer, Stephen. "God's Greenhouse." (*PL*) I-2: 40,44 Sp93
- "African-American Celebration at Atonement." (*PL*) II-3: 23-24 Su94
- "Funding the Parish School." (*TLE*) XXXIII-1: 4-11. O92
- Schaller, Adalbert. "E.G." (*LSB*) II-2: 1. N31
- "Beneficial Methods of Private Bible Study." (*LSB*) IX-2: 1-3. D38
- "Christmas on the Air." (*LSB*) XII-2: 2-3. D41
- "F.W. Meyer." (*LSB*) XIX-3: 1-2. F49
- "Emil Trettin, Executive Secretary, Board of Education." (*LSB*) XIX-4: 1. My49
- "Gleanings From the Field of Prayer." (*LSB*) XVIII-4: 1-3. My48
- "A Faithful and Wise Steward." (*LSB*) XXII-1: 1-2. O51
- Schaller, Egbert. "The Failure of Unbelief." (*LSB*) XII-3: 1-2. Mr42
- "The Spectre of Post-war Dangers Confronting Our Christian Education." (*LSB*) XVI-1: 1-2. O45
- "Gleanings From the Field of Prayer." (*LSB*) XVIII-1: 1-2. O47
- "Is There Room for Improvement in Our Children's Christ Eve .." (*LSB*) XXI-2: 1-2. D50
- "A Blessed Fellowship." (*LSB*) XXIV-3: 1-2. F54
- "The Wisdom of Little Things." (*LSB*) XXV-4: 1-2. My55
- Schaller, Loren. "Communism in Education—A Brief Glance." (*TLE*) II-3: 2-3. F62
- "Adolescent, His Pastor and Christian Teachers, The." (*TLE*) VIII-4: 15-17. My68
- "Pollution." (*TLE*) XI-1: 13-15. O70
- "Relevance." (*TLE*) XI-2: 10-11. D70
- "Flegel Und Backfishjahre." (*TLE*) XII-1: 13-15. O71
- "Some Thoughts on the Call." (*TLE*) XII-2: 15-16. D71
- "Gurus, etc." (*TLE*) XII-3: 18-19. F72
- "Some Thoughts on the Call." (*TLE*) XV-4: 2-3. My75
- Schaller, Ruth. "Respite Care." (*PL*) II-1: 16-17 Fa93
- "A Suggestion for Language Work in the Primary Grades." (*LSB*) IX-1: 3-4. S38
- "We Are in Holland." (*LSB*) IX-2: 5-6. D38
- "Do You Know Our Winter Birds?" (*LSB*) XV-2: 5. D44
- Schaller, W. "Cultivation of Interest in CDS at Our Academies." (*LSB*) XI-4: 1-2. My41
- "Inspiring Principles of Education From Inspired Education (John)." (*LSB*) XIX-3: 2-3. F49
- Schallhorn, B. "What Can We Expect of Children Entering First Grade From Kn." (*LSB*) XIX-3: 3. F49
- Scharf, Erwin. "Tool to be Cherished, A." (*TLE*) VII-4: 9-11. My67
- "The Distinction Between Chastisement and Punishment (1)." (*LSB*) XVII-1: 1-3. O46
- "The Distinction Between Chastisement and Punishment (2)." (*LSB*) XVII-2: 1-4. D46
- "Lent and Easter in the Christian Day School Classroom." (*TLE*) XVII-3: 2-4. F77
- "Lent and Easter in the Christian Day School Classroom." (*LSB*) XX-3: 1-2. F50
- "The Ascension Festival Service." (*LSB*) XXIII-3: 1-2. F53
- "We Are the Lord's." (*LSB*) XXX-1: 1-2. O59
- Scheibe, Jeff. "Our Mission to Youth." (*LL*). VII-4: 20-21 Su99
- Scherbarth, David. "Wrestling with the Ephesian Problem." (*PL*) III-3: 10-11 Su95
- Scherzer, Robert. "TV or Not TV, That is the ?" (*TLE*) II-1: 6-7. O61
- Scheuerlein, Don. "Teaching Children to Pray." (*TLE*) XXIX-3: 63-68. F89
- Schierenbeck, James R. "Helping the Uncertain Singer." (*TLE*) XXXIII-2: 52-53. D92
- Schierenbeck, Robert. "How Can and Should a Pastor Bring the Matter of CDS to People." (*LSB*) I-1: 2-3. N30
- "How Can and Should a Pastor Bring the Matter of the CDS." (*TLE*) XI-1: 5-6. O70
- Schink, W.F. "Inspiring Principles of Education From Inspired Educators (Solomon)." (*LSB*) XIX-2: 1-2. D48
- Schlenovogt, Jane. "The Gift of Prayer." (*LP*) X-5: 24 My/Ju 03.
- Schlepp, Jeff. "Leadership—A Board Member's Perspective." (*PL*) II-1: 50-51 Fa93
- Schleusener, Beth. "Celebrate the Faith." (*LL*). VIII-3: 28-29 Sp00
- Schlieue, Richard. "The Doxology of the Lord's Prayer."

- (*TLE*) XXVIII-4: 76-77. My88
- Schlueter, Viola. "How I Did It (1)." (*LSB*) XXI-2: 6-7. D50
- . "How I Did It (2)." (*LSB*) XXI-3: 2-4. F51
- Schmal, Daniel. "Organized to Serve." (*LL*) IX-4:28-29 Su01
- Schmal, Mary. "Teaching Children How to Memorize." (*PCE*) II-2: 26-27. Fa90
- . "As God Wills." (*LP*) V-6:12-13 July/Aug98
- . "Part of the Family." (*LP*) VI-5: 5 May/June99
- . "The Heavens Still Declare the Glory of God." (*LP*) IX-6:6-7 July/Aug02
- . "When Time Runs Out." (*LP*) XI-5: 4-5 May/Jun04.
- . "Writing Equals Thinking." (*LP*) X-3: 30-31 Ja/Fe 03.
- Schmeling, Daniel. "Families: A Focus of the Lutheran Schools' Mission." (*PL*) I-1: 41-42. N92
- . "Families: A Focus of the Lutheran Schools' Mission." (*PL*) III-1: 18-19 Fa94
- . "Why Economics?" (*TLE*) XIV-1: 14-16. O73
- . "What Economics?" (*TLE*) XIV-2: 16-19. D73
- . "Sing (and Write) Unto Him a New Song." (*TLE*) XIX-1: 10-12. O78
- . "Keeping Our Classrooms Current." (*TLE*) XIX-2: 13-14. D78
- . "Will You Help Build His House?" (*TLE*) XX-1: 15-16. O79
- . "Language Curriculum and Communicating the Gospel." (*TLE*) XXI-1: 10-11. O80
- . "Renewed Interest in the Arab-Muslim World, A." (*TLE*) XXI-3: 11-12. F81
- . "Absolutes? Absolutely!" (*TLE*) XXII-1: 15-17. O81
- . "The Garden of Eden: A Model for Classroom Discipline." (*TLE*) XXII-2: 5-7. D81
- . "Which is the Right Side?" (*TLE*) XXII-4: 11-13. My82
- . "Love is Ageless." (*TLE*) XXIV-1: 11-13. O83
- . "Teaching the Gifted Child—Why?" (*TLE*) XXV-1: 4-6. O84
- . "Walking Together: K-12 Partnership." (*TLE*) XXVIII-3: 54-56. F88
- . "Funding Our Schools." (*LL*) IX-3:8-10 Sp01
- . "Lutheran Schools Now." (*LL*) VIII-3: 18-19 Sp00
- . "Five Lessons From Daniel." (*LP*) VII-3: 4-5 Jam/Feb00
- . "Uniquely United." (*LL*) X:1 20-21 Fa01
- Schmidt, Gertrude + Quand. "Useful Art Projects." (*TLE*) V-2: 6-7. D64
- Schmidt, Michelle. "How To Handle a Bully." (*LP*) VIII-6: 6-8 July/Aug01
- Schmidt, Wayne. "Reason, The." (*TLE*) II-2: 2-3. D61
- . "Is This My Call?" (*TLE*) II-2: 3. D61
- Schmugge, Karl. "Outreach at International Plowing Match." (*PL*) III-3: 26-27 Su95
- Schneck, James. "Moral Training: Not Just a Parent's Responsibility." (*ELS*) I-1:1 Fa97
- . "Moral Training: Not Just a Parent's Responsibility." (*ELS*) I-1: 1 Fall 97
- . "Your Christian Philosophy, Your Legacy." (*ELS*) I-3:2 Sp98
- Schnick, Thomas. "Phonological Training for Reading Teachers." (*TLE*) XXIX-1: 7-9. O88
- Schnitker, Heine. "Physical Sciences, The." (*TLE*) XII-3: 10. F72
- Schone, Jeffrey. "Assessing the Mission Statement of Martin Luther College from a Student Affairs Perspective." (*TLE*) XLVI-1: 14-20. O05.
- Schoeneck, Marcella. "Art in the Primary Picture." (*TLE*) X-4: 4-5. My70
- Schommer, Jodie. "Development of Gross Motor Skills in Preschool Children." (*TLE*) XXXVI-3: 82-84 F96
- Schroder, Karen. "Blindsided. Yet Blessed." (*LP*) VIII-1: 4-5 Sep/Oct00
- Schroeder, David. "Oral History As a Teaching Approach in Secondary Schools." (*TLE*) XXVII-1: 11-14. O86
- . "You Are an Awakener: Literature in the Classroom." (*TLE*) XXXI-1: 19-24. O90
- Schroeder, E.M. "The Role of the School Library." (*LSB*) XVIII-1: 3-5. O47
- Schroeder, Jonathan. "Worship That Treasures Every Soul." (*LL*) XIII-2 18-19 Wi05.
- Schroeder, Marlyn. "Problems of Rural Sunday Schools." (*TLE*) I-3: 20-21. F61
- . "Use of Visual Aids, The." (*TLE*) III-1: 13-15. O62
- Schroeder, Martin. "On Being A Professional." (*TLE*) XXX-2: 27. D90
- . "A Little Learning...A Dangerous Thing." (*TLE*) XXXII-3: 67. F92
- . "The Reading-Writing Connection: Something New?" (*TLE*) XXXIII-3: 67. F93
- . "Not...first...,Nor...last...." (*TLE*) XXXIV-3: 67. F94
- Schroeder, Morton. "To Read or Not to Read." (*LSB*) XIX-4: 2-3. My49
- . "What is New in Professional Books." (*LSB*) XIX-4: 2. My49
- . "New Ulm in Retrospect." (*LSB*) XX-4: 6-7. My50
- . "Landmark Books: A Significant Contribution to Child Lit (1)." (*LSB*) XXI-4: 8-10. My51
- . "The 'Land of the Free' Series." (*LSB*) XXII-2: 8-10. D51
- . "Landmark Books: A Significant Contribution to Child Lit (2)." (*LSB*) XXII-4: 9-10. My52
- . "Historical Fiction Stimulant Par Excellence." (*LSB*) XXIII-4: 11-15. My53
- . "Exceptional Children." (*LSB*) XXIII-4: 2-4,13-14. My53
- . "Of Whom the World Says Much." (*LSB*) XXIV-4: 7-9. My54
- . "Cathedrals Have Attics." (*TLE*) XXVI-1: 18-20. O85
- . "Author, the Teacher, and the Miner, The." (*TLE*) XXVI-3: 18-21. F86
- . "Current Trends in Children's Literature." (*LSB*) XXVI-II-2: 1-5. D57

- , “Portugal: Land of Contrasts.” (*TLE*) XXVIII-4: 10-11. O87
- , “Book Reviews.” (*TLE*) XXVIII-4: 4-6. O87
- Schroeder, Tim. “Challenging Academically Talented Students in Lutheran High School.” (*TLE*) XXX-2: 34-38. D89
- Schroer, Gerald. “First Aid.” (*LL*). IX-1: 28-29 Fa(*LL*)00
- Schubkegel, Francis. “Service Playing—Hymn Accompaniments.” (*TLE*) XVI-2: 13-15. D75
- Schuetze, Armin. “Use of Modern Bible Translations in Our Classrooms.” (*TLE*) XIII-4: 4-7. My73
- , “Inspiring Principles of Education From Inspired Educators (Moses).” (*LSB*) XIX-1: 1-2. O48
- , “Receiving the Christchild as Little Children.” (*LSB*) XXIV-2: 1-2. D53
- Schuetze, John. “The Body Beautiful.” (*LP*) V-3:10-11 Jan/Feb 1998
- Schuetze, Margot. “Practical Suggestions on the Teaching of Hymns.” (*LSB*) XXVI-1: 5-7. O55
- , “Teaching a Hymn.” (*LSB*) XXVI-3: 2-4. F56
- Schuetze, Victoria. “Timmy Begins School.” (*TLE*) V-1: 4-5. O64
- , “Stimulating the Young Child.” (*TLE*) VI-1: 6-7. O65
- Schultz, Anthony. “You Can Tell the Little Children.” (*PL*) I-1: 37-38. N92
- , “Where Have All the Heroes Gone?” (*PL*) IV-2: 35-37 Sp96
- , “The Littlest Missionaries Have Motive, Means and Opportunity.” (*TLE*) XXX-2: 28-33. D89
- , “The Cry Room.” (*LP*) VI-3: 5 Jan/Feb 99
- Schultz, Beth. “Communicating Christ to One of His Sheep.” (*PL*) IV-3: 35-36 Su96
- Schultz, Dennis. “Has It? Will It? What About It?” (*TLE*) XXVI-1: 15-18. O85
- , “Antidisestablishmentarianism—by Coincidence.” (*TLE*) XXVI-2: 15-16. D85
- , “Call For Your Reactions, A.” (*TLE*) XXVI-2: 3. D85
- , “Take Seven!” (*TLE*) XXVI-3: 12-14. F86
- , “With Devotion and a Willing Mind.” (*TLE*) XXVII-1: 5-8. O86
- , “Going Public?” (*TLE*) XXVII-2: 13-15. D86
- Schultz, Erhardt. “Day School Kids and The Other Kids.” (*TLE*) XVIII-1: 5-7. O77
- , “Sunday School Teachers’ Meeting, The.” (*TLE*) XVIII-2: 5-7. D77
- Schultz, F. W. “Child and the Curriculum of the School, The.” (*TLE*) IX-3: 9-10. F69
- Schulz, James. Variety for Worship.” (*LL*) VI-3:8-10 Sp98
- Schultz, John. “Becoming Involved in Curriculum Study.” (*TLE*) XI-4: 7-9. My71
- , “Planning for Individualized Learning.” (*TLE*) XIV-4: 15-16. My74
- , “Recognizing Individualized Curricula.” (*TLE*) XV-1: 15-17. O74
- , “Instructional Procedures in Individualized Learning” (*TLE*) XV-3: 8-10. F75
- , “Organizational Considerations for Individualized Learning.” (*TLE*) XV-4: 11-13. My75
- , “Assurance of Victory.” (*TLE*) XLIII-2: 36 D02.
- , “Encouragement for Those Who Feel Overwhelmed.” (*TLE*) XLIII-3: 100-101 My03.
- , “Light on the Path in a Dark World.” (*TLE*) XLIII-1: 4 O02.
- , “You are a Deep Concern to Jesus.” (*TLE*) XLIII-3: 68 F03.
- , “Don’t Laugh Until Christmas”. (*TLE*). XLV-3: 68-69. F05.
- , “A Friend in High Places.” (*TLE*). XLV-1:4-5 O04.
- , “Christian Joy Produces Prayer.” (*TLE*). XLIV-4: 100-101, M04.
- , “Christian School Discipline.” (*TLE*). XLVII-3: 68-69. F07.
- , “Excel in Godliness.” (*TLE*). XLVI-3: 68-69. F06.
- , “Helping Teachers Stress Reconciliation.” (*TLE*). XL-1:4-6. O03.
- , “Joy in Remembrance.” (*TLE*). XLVII-4: 100-101. M07.
- , “No Vacancy.” (*TLE*). XLVII-2: 36-37. D06.
- , “Overcoming Weariness.” (*TLE*). XLVI-4: 100-101. M06.
- , “Rejoice! The Lord Is Near.” (*TLE*). XLV-2: 36-37. D04.
- , “Teachers Need Christmas Peace.” (*TLE*). XLIV-2: 36-37. D03.
- , “The Christian’s Real War.” (*TLE*). XLVII-1: 4-5. O06.
- , “The Extra Mile.” (*TLE*). XLVI-1: 4-5. O05.
- , “The Living Hope of Heaven.” (*TLE*). XLV-4: 100-101. M05.
- Schulz, Mark. “Out of the Tents.” (*LL*) XII-3: 20-21 Sp04..
- Schultz, Michael. “MIDI and ....” (*LL*) X-3:26-27 Sp02
- Schultz, Thomas. “Communion on Festivals.” (*LL*). VIII-1: 20-21 Fa99
- Schultz, Tony. “God’s Great Sense of Humor.” (*LP*) III-2: 6-7. Nov/Dec 95
- , “Dollars and Sense.” (*LP*) III-3: 8-9. Jan/Feb 96
- Schulz, Arthur. “Experimental Programs and the Curriculum.” (*TLE*) IV-1: 8-9. O63
- , “Accreditation—Certification, 1963.” (*TLE*) IV-2: 12-14. D63
- , “In Pursuit of Excellence.” (*TLE*) IV-3: 7-9. F64
- , “The Christian Teacher and the Curriculum.” (*TLE*) IV-4: 15-16. My64
- , “Tasted - Swallowed - Chewed - Digested.” (*TLE*) V-4: 22-23. My65
- , “Sing Out For Books.” (*TLE*) VI-2: 10-11. D65
- , “Departmentalization.” (*TLE*) VIII-3: 8-11. F68
- , “Intermediate Grade Child and His Teacher, The.” (*TLE*) VIII-4: 8-11. My68
- , “What is New in Professional Books.” (*LSB*) XXIII-1: 4. O52
- , “What is New in Professional Books.” (*LSB*) XXIII-2: 3.

- D52
- . "A Year to Note." (*TLE*) XXIX-3: 51. F89
- . "Book Review." (*LSB*) XXVI-1: 7-8. O55
- . "Maintaining Classroom Discipline." (*LSB*) XXVII-1: 4-6. O56
- . "A Wholesome Concern." (*TLE*) XXX-3: 51. F90
- . "Helping At-Risk Students." (*TLE*) XXXI-3: 51. F91
- . "Two New Read-aloud Book Awards." (*TLE*). XLVI-4: 114-117. M06.
- Schulz, James. "Easier Than You Think." (*LP*). VII-4:6-8 Mar/Apr00
- . "Rite Things for the Right Reasons." (*LP*). VIII-2: 5 Nov/Dec00
- Schulz, Joel. "Soccer and Jesus." (*LL*) X-2: 8-10 Wi02
- Schulz, Mark. "Marching with the King's Kids." (*PL*) III-2: 12-13 Sp95
- . "... in Prison and You Visited Me." (*PL*) IV-1: 25-26 Fa95
- Schulz, Reuel. "A. Most Important Little Word." (*TLE*) XV-4: 4-5. My75
- Schulz, W.E. "Preach the Word." (*LSB*) XXVI-1: 1-2. O55
- . "Herman E. Gurgel." (*LSB*) XXX-1: 7-8. O59
- Schulz, Wayne. "Worship and Outreach: Partners in Life." (*PL*) I-2: 37,39 Sp93
- . "Worship and Outreach: Partners in Life (2)." (*PL*) I-3: 48-49 Su93
- . "Nurture and Outreach." (*LL*) X:1 18-19 Fa01
- Schumacher, Ray. "The Danger of the Dorky Dad." (*LP*) IX-6:4-5 July/Aug02
- Schumann, Dolores. "Rhythmic Activities in the Primary Grades." (*TLE*) I-1: 4-5. O60
- . "Teaching a Reading Song." (*LSB*) XXVII-1: 7. O56
- Schwecke, Floyd. "Career Education." (*TLE*) XIV-4: 22-24. My74
- Schweppe, Carl. "Spiritual Depression." (*LSB*) II-3: 1. J32
- . "The Challenge to Education." (*LSB*) III-1: 1-4. O32
- . "A Few Comments on Literature in Our Schools." (*LSB*) X-3: 3-4. F40
- . "Few Comments on Literature in Our Schools, A." (*TLE*) XI-2: 16-18. D70
- . "1 Kings 10:1-13." (*LSB*) XXVIII-1: 1-2. O57
- Scriven, Neil, et al. "The ALHS Development Director." (*TLE*) XXXII-4: 100-107. My92
- Seager, Heather. "The Painful Truth." (*LP*) X-2: 30-31 Nov/Dec02.
- Sellnow, David. "E. T. -the Extra-Textual." (*TLE*). XLVII-2: 35. D06.
- . "Letting Students Grow Up." (*TLE*). XLVI-3: 67. D05.
- . "Making the Classroom into a Muckhole." (*TLE*). XLIV-4: 125-128, M04.
- . "Teaching a Love for Souls." (*TLE*). XLV-4: 99. M05.
- . "Whoever is Not Against Us is For Us." (*TLE*). XLVII-3: 91-96. F07.
- Seidel, Gene. "Help! I Can't Hear You." (*LL*) X-3:28-29 Sp02
- Seifert, John. "Jesus, the Unknown King." (*TLE*) XX-2: 1. D79
- Serrahn, Louis. "Christian Child Training (Erziehung)." (*LSB*) IV-2: 1-6. M34
- Shilling, Ronald. "Service Playing: Accompanying the Choir and Soloist." (*TLE*) XVI-4: 17-19. My76
- Siegler, Oscar. "The Fear of the Lord is the Beginning of Wisdom." (*TLE*) III-3: 11-14. F63
- Sievert, Ada. "Reflections." (*TLE*) II-1: 4-5. O61
- Sievert, Adelia. "Luther in the Primary Grades." (*TLE*) VII-4: 12-13. My67
- . "Picture Study for Third Grade." (*LSB*) X-3: 5-6. F40
- Sievert, Alma. "A Lesson in Numbers for the Second Grade." (*LSB*) IX-1: 4-5. S38
- Sievert, Erich. "Teacher Learned Me." (*TLE*) III-3: 6-8. F63
- . "How to Conduct a Fifth Grade Reading Lesson." (*LSB*) IX-2: 3-5. D38
- . "Leadership—Some Findings of Research." (*TLE*) V-1: 8-9. O64
- . "ITA — ARA — TO." (*TLE*) V-4: 8-9. My65
- . "Upper Grade Child and his Teacher, The." (*TLE*) VIII-4: 12-14. My68
- . "Correlating Art With the Church Year." (*LSB*) XIX-4: 1-2. My49
- . "How to Interest Children in Outside Reading." (*LSB*) XV-1: 3-4. O44
- . "Prominent Educators: Spencer." (*LSB*) XVI-4: 3-4. My46
- . "LD—Learning Disabilities." (*TLE*) XVII-1: 11-13. O76
- . "What is New in Professional Books." (*LSB*) XX-1: 2. O49
- . "What is New in Professional Books." (*LSB*) XXI-4: 2-4. My51
- . "The Good English Series." (*LSB*) XXIII-2: 4. D52
- . "Are the Hymn Numbers Ready?" (*LSB*) XXIII-4: 16. My53
- Sievert, Hertha. "Evaluation Of Our Teaching of Bible Stories, An." (*TLE*) II-2: 4-5. D61
- . "Mental Health Problem in Our Schools, The." (*TLE*) II-4: 4-5. My62
- . "Speech Correction for Our Children." (*TLE*) IV-1: 4-5. O63
- . "Case History of Speech Correction, A." (*TLE*) IV-2: 4. D63
- . "The Miracle of Speech." (*TLE*) IV-3: 4. F64
- . "A Geography Lesson for Third and Fourth Grade." (*LSB*) XI-1: 5. S40
- . "Problems in My Third/Fourth Grade Reading Course ...." (*LSB*) XIX-2: 3. D48
- Sievert, K. "A Christian Teacher's Sure Foundation." (*LSB*) XIII-3: 1-2. F43
- Sievert, Robert. "Government Aid to Parochial Schools - Opportunity or Obligation ." (*TLE*) XXII-2: 11-13. D81
- Sievert, Roger. "Communications Among Our Schools."

- (*TLE*) XXIII-2: 16-18. D82
- . "Teaching the Gifted." (*TLE*) XXV-3: 1-3. F85
- Sievert, Walter. "Bible Reading in Our Schools." (*TLE*) V-3: 6-7. F65
- Sims, Melinda. "New Plans for Wellspring." (PL) III-3: 33-34 Su95
- Singer, Gregg. "Why Evangelical Colleges Die." (*TLE*) III-2: 15-16. D62
- Sitz, A.P. "Roman Education (1)." (*LSB*) XVII-3: 2-4. F47
- . "Roman Education (2)." (*LSB*) XVII-4: 2-3. My47
- Sitz, Carleton. "Initial Teaching Alphabet." (*TLE*) VI-1: 10-12. O65
- . "i/t/a Project in St. John's School, The." (*TLE*) VII-1: 11-12. O66
- . "Conditioning Young Bodies for Sports and for Life." (*TLE*) XVII-3: 16-18. F77
- . "Training the Most Important Muscle in the Body." (*TLE*) XVII-4: 14-16. My77
- Sitz, Herbert. "Book Chat." (*LSB*) I-1: 4-5. N30
- . "A School Exhibit." (*LSB*) I-2: 1. n.d.30
- . "Book Chat." (*LSB*) I-2: 4-5. n.d.30
- . "The Use of the School Library." (*LSB*) I-3: 1. n.d.31
- . "How About Singing?" (*LSB*) I-3: 3. n.d.31
- . "Book Chat." (*LSB*) I-3: 5. n.d.31
- . "The Minnesota Plan." (*LSB*) II-1: 2. S31
- . "The School Library." (*LSB*) II-1: 3-5. S31
- . "Book Reviews." (*LSB*) II-1: 5-6. S31
- . "Book Reviews." (*LSB*) II-1: 5. S31
- . "How to Prepare Pupils for the State Examinations." (*LSB*) II-2: 3-5. N31
- . "The School Library." (*LSB*) II-2: 3. N31
- . "Book Reviews." (*LSB*) II-2: 5. N31
- . "The Washington Bicentennial." (*LSB*) II-3: 3-4. J32
- . "Book Chat." (*LSB*) II-3: 5. J32
- . "Book Chat." (*LSB*) II-4: 5. Mr32
- . "Super-Enthusiasm." (*LSB*) III-1: 4-5. O32
- . "Book Chat." (*LSB*) III-1: 6. O32
- . "Shall It Be a Depression Christmas?" (*LSB*) III-2: 1. N32
- . "Book Chat." (*LSB*) III-2: 6. N32
- . "Let Us Build the House." (*LSB*) III-3: 1. F33
- . "Book Chat." (*LSB*) III-3: 5. F33
- . "Book Chat." (*LSB*) III-3: 6. F33
- . "A New Course of Study for Minnesota Schools." (*LSB*) IV-1: 3-4. O33
- . "Let Us Rise Up and Build." (*LSB*) IV-3: 1. Ap34
- . "Book Selection in Our High School Libraries." (*TLE*) IV-3: 10-11. F64
- . "DMLC's Golden Jubilee Celebration." (*LSB*) IV-3: 2. Ap34
- . "Book Chat." (*LSB*) IV-3: 3-4. Ap34
- . "A Study Unit on the Vision of Sir Launfal." (*LSB*) IX-4: 4-5. My39
- . "A New School Year Begins." (*LSB*) V-1: 1-2. S34
- . "Stand Still and See." (*LSB*) V-2: 1. N34
- . "Suggestions for the High School Library." (*TLE*) V-2: 10-12. D64
- . "An Educational Challenge." (*LSB*) V-3: 1. Ja35
- . "On Guard." (*LSB*) V-4: 1. Mr35
- . "We Begin the New School Year." (*LSB*) VI-1: 1. O35
- . "Care and Use of the New Type Objective Tests." (*LSB*) VI-2: 8. D35
- . "And The Pope Doodles?" (*TLE*) VI-3: 12-13. F66
- . "Editorial." (*LSB*) VI-4: 3-4. Ap36
- . "Of Books and Things." (*TLE*) VII-3: 19-20. F67
- . "Values of the CDS in Preparing the Pupil For His Place in Cm." (*LSB*) VIII-1: 1-3. S37
- . "There are Books on the Subject." (*TLE*) VIII-4: 21. My68
- . "Book Reviews by Children." (*TLE*) XI-3: 18-19. F71
- . "Address to the Minnesota Lutheran Teachers Conference." (*LSB*) XII-2: 3-4. D41
- . "Mild Dissent, A." (*TLE*) XII-4: 13-14. My72
- . "Anniversary of G. Burk." (*LSB*) XIV-2: 4. D43
- . "From a Schoolroom Window." (*LSB*) XIV-2: 5-6. D43
- . "No Homework Today!" (*TLE*) XIV-3: 23. F74
- . "From a Schoolroom Window." (*LSB*) XV-2: 5-6. D44
- . "From a Schoolroom Window." (*LSB*) XV-3: 5. F45
- . "From a Schoolroom Window." (*LSB*) XV-4: 5-6. My45
- . "The Intelligence Test Today." (*LSB*) XVII-4: 1-2. My47
- . "The Functions of Literature in the Schools (1)." (*LSB*) XX-1: 2-4. O49
- . "The Functions of Literature in the Schools (2)." (*LSB*) XX-2: 3-4. D49
- . "The Functions of Literature in the Schools (3)." (*LSB*) XX-3: 3-4. F50
- . "The Functions of Literature in the Schools (4)." (*LSB*) XX-4: 4-5. My50
- Sitz, Ruth. "Senior Ministry." (PL) I-3: 41 Su93
- Smith, Kristen. "The Subtle Seductive Power of TV." (LP). VIII-5:4-6 May/Jun01
- . "All in the Balance." (LP) IX-5: 14 Ma/Ju 02
- . "Pornography: Challenge for a Growing Conscience" (LP) IX-2: 6-8 Nov/Dec 01
- . "Bridge the Gap." (LP) X-5: 6-8 My/Ju 03.
- . "Careening Down the Information Highway." (LP) X-2: 6-8 Nov/Dec02.
- Smith, Robyn. "Simple Joys." (LP) XI-2: 24 Nov/Dec 03.
- . "Stranger Danger." (LP) X-6: 28-29 Ju/Au 03.
- Snamiska, Paul. "The Perfect Match." (LP) XI-4: 28-29 Mar/Apr04.
- . "To Clone or Not to Clone." (LP) XI-1: 30-31 Sep/Oct 03.
- Sneaden, Victor. "The Report Card (1)." (*LSB*) XXIV-3: 7-8. F54
- . "The Report Card (2)." (*LSB*) XXIV-4: 6-7. My54
- . "Handwriting." (*LSB*) XXV-3: 5-7. F55
- Snyder, Kristin. "Normal?...not exactly!" (LP)V-6:6-8 July/Aug98
- Sonnenberg, Gary L. "Use Your Apple Ite." (*TLE*) XXXI-

- II-2: 36-37. D92
- Sonnenburg, Richard. "Video Recorder in My Classroom?" (*TLE*) XXI-4: 12-13. My81
- Sonntag, Craig. "Survival Skills: A Real-World Simulation." (*TLE*). XLI-2: 38-39 D00
- Sonntag, Dorothy. "The First WELS Sunday School Convention." (PCE) II-3: 35-37. Wi90
- . "Learning Centers in the Kindergarten." (*TLE*) XVII-2: 7-8. D76
- Sordahl, Peter. "Worship Committee Benefits." (*LL*) IX-4:26-27 Su01
- . "Summer Music." (*LL*) X-2: 20-21 Wi02
- Sorgatz, Edwin. "Christian Teacher and His Congregation." (*TLE*) IV-4: 4-6. My64
- Sorum, E.Allen. "Our Lutheran Heritage of Christian Education is Also the Evaluation." (*TLE*) XXXVII-3: 68-79 F97
- . "Keeping Lutheran Schools Lutheran." (*TLE*). XLVII-1: 11-19. O06.
- Soukup, Paul. "A Satanic Summit of Sunday School." (PCE) I-4: 55. Sp90
- Spaude, Luther. "Science in the Lutheran High School." (*TLE*) V-4: 11-13. My65
- Spaude, Michael. "VBS Follow-up." (PCE) II-1: 8-9. Su90
- Spaude, Naomi. "Speak, Read, Write." (*TLE*) XVII-1: 7-8. O76
- Spaude, Phil. "More With Less." (*LL*). VIII-4: 26-27 Su2000
- Special Education Committee. "A Philosophy of Christian Special Education." (*TLE*) XXXVI-3: 91-93 F96
- Sponholz, Martin. "Naturalist and the Scientist, The." (*TLE*) XVIII-4: 10-12. My78
- . "South for the Winter." (*TLE*) XXIV-1: 17-19. O83
- . "Expeditions of Failure." (*TLE*) XXIV-2: 6-9. D83
- . "Not Always Positive." (*TLE*). XLVI-2: 55. D05.
- Spriggs, Martin. "Home Bible Study Groups." (PCE) II-1: 6-7. Su90
- Spurgin, Alan. "Developing a Science Unit with Limited Funds and Facilities." (*TLE*) XVII-2: 11-12. D76
- . "Parents as Advocates for the Exceptional Child." (*TLE*) XXXVII-2: 53-56 D96
- . "Accommodating the Student With Special Needs." (*TLE*) XXXVIII-2:56-58 D97
- . "Understanding Oppositional Defiant Disorder." (*TLE*) XLII-4:122-124 My01
- . "Accommodate and Adapt for Struggling Students." (*TLE*). XLV-3: 80-83. F05.
- . "Attending a Professional Conference." (*TLE*). XLVII-2: 38-39. D06.
- Staab, William. "Evangelism Opportunities." (*TLE*) XX-1: 10-12. O79
- . "My Road to Faith." (*TLE*) XX-2: 9-11. D79
- . "Ethics of the Lutheran Teacher (1)." (*TLE*) XX-3: 9-11. F80
- . "Ethics of the Lutheran Teacher (2)." (*TLE*) XX-4: 10-13. My80
- . "Ethics of the Lutheran Teacher (3)." (*TLE*) XXI-1: 14-16. O80
- . "After High School — Then What?" (*TLE*) XXII-4: 8-10. My82
- . "'M and M's' of Communication, The." (*TLE*) XXIV-3: 18-20. F84
- . "But This Isn't English Class." (*TLE*) XXV-1: 8-9. O84
- Staab, William + Stueber. "Educational Alternatives." (*TLE*) XXII-1: 12-15. O81
- Stadler, Richard. "Solo Mission or Team Challenge?" (PCE) I-2: 20-21. Fa89
- . "Is the Home Supporting Your Sunday School Effort?" (PCE) I-3: 40. Wi89
- . "Jesus and Socrates in the Youth Program?" (*TLE*) XXI-1: 5-7. O80
- Starr, Laurie. "Christian Motherhood: A Patchwork Quilt." (LP) III-5: 4. May/June 96
- . "Pray the Day Away." (LP)V-5:10-11 May/June 1998
- . "Pink, Blue, or Androgyny." (LP) VI-1: 14 Sep/Oct98
- . "The Pain of Postpartum." (LP). VI-6: 7-8 Ju/Au99
- . "Seeds of Favortism." (LP). VII-6: 15 July/Aug 00
- . "What Kids Wish Their Parents Knew." (LP) IX-1: 4-5 Sep/Oct 01
- . "Blessings Through Bruising." (LP) X-2: 28-29 Nov/Dec02.
- . "Taking the Treasure Hunt." (LP) XI-5: 24 May/Jun04.
- Starr, Richard. "Mom, Dad, I'm Gay." (LP) X-5: 4-5 My/Ju 03.
- Steele, Loren. "Impact Teaching! Power Teaching With Chalk." (PCE) III-1: 10-11. Su91
- Steinbach, Paul. "Using Various Study Guides to Teach Bible History." (*TLE*) XXVIII-4: 82-85. My88
- . "Reading Methods in the WELS." (*TLE*) XXXIV-4: 108-112 My94
- Steinbrenner, Dennis. "Skill- and Content-Based Social Studies Curriculum, A." (*TLE*) XIX-4: 17-20. My79
- . "Stock Market Simulation." (*TLE*). XLI-1: 10-13 O00
- Stellhorn, A. C. "Home Rehabilitation and the School." (*TLE*) II-3: 20. F62
- Stelljes, O.W. "A History Study Unit for Upper Grades." (*LSB*) X-1: 2-3. S39
- Stellwagen, L. "Prominent Educators: Rousseau." (*LSB*) XVI-3: 3-6. F46
- Stelter, Edward. "Leading the Children into the Bible through the Morning Devotion." (*TLE*) XVIII-3: 10-11. F78
- Stern, Paul. "Teaching the Teacher." (PCE) II-1: 12-13. Su90
- . "The Sunday School and Its Infrastructure." (PL) II-3: 41-42 Su94
- Stern, T.F. "The Secret of Christian Service." (*LSB*) XXIX-3: 1-2. F59
- Stetzenbach, Terry. "Ho! Ho! Ho!" (LP) III-2: 9-10. Nov/Dec 95
- . "Minding the Minefield." (LP)V-1:14 Sep/Oct 1997
- . "The Time-management Two-step." (LP)V-2:15-16

- Nov/Dec 1997
- , “The Gift of Stress? Yes.” (*LP*) VI-1: 5 Sep/Oct98
- , “Take me out to the Ball Game.” (*LP*). VI-6: 10-11 Ju/Au99
- , “The Perfect Party.” (*LP*) IX-5: 4-5 Ma/Ju 02
- Stindt, A.C. “The Pupil’s Vocabulary.” (*LSB*) I-2: 2-3. n.d.30
- , “Book Chat.” (*LSB*) I-2: 4. n.d.30
- , “Book Reviews.” (*LSB*) II-1: 5. S31
- , “The Daily Program.” (*LSB*) II-1: 7. S31
- , “The Daily Program.” (*LSB*) II-2: 2. N31
- , “Book Reviews.” (*LSB*) II-2: 5. N31
- , “Busy Work in Our Schools (1).” (*LSB*) II-2: 6. N31
- , “Busy Work in Our Schools (2).” (*LSB*) II-3: 2-3. J32
- , “Practical Suggestions for Busy Work (3).” (*LSB*) II-4: 2-4. Mr32
- , “Book Chat.” (*LSB*) II-4: 5. Mr32
- , “Book Chat.” (*LSB*) III-2: 6. N32
- , “We Do Our Part.” (*LSB*) IV-1: 1-2. O33
- , “A Suggested Program.” (*LSB*) IV-1: 6. O33
- , “Time Allotment and Order of Subjects in the Daily Program.” (*LSB*) VIII-1: 5. S37
- , “A Practical Lesson in the Teaching of Catechism.” (*LSB*) X-2: 3-4. D39
- , “I Tell You that ... Luke 19:40 (part 1).” (*LSB*) XI-1: 4-5. S40
- , “I Tell You that ... Luke 19:40 (part 2).” (*LSB*) XI-2: 3-4. D40
- , “A Curriculum Study in Art (part 1).” (*LSB*) XI-3: 3-5. F41
- , “A Curriculum Study in Art (part 2).” (*LSB*) XI-4: 3-6. My41
- , “The Leaf.” (*LSB*) XV-3: 4-5. F45
- Stoekli, Winfred. “Parent-Teacher Conferences.” (*TLE*) I-2: 7-8. D60
- , “Training Children to Apply Christian Principles in Social Life.” (*LSB*) XXIV-1: 12-14. O53
- Stone, Rue. “Winged Writing: The Need to Teach Poetry in the Elementary School Classroom.” (*TLE*) XXX-3: 56-57. F90
- , “A Prayer for Our Schools.” (*TLE*) XXXIII-1: 25. O92
- Stresman, Kathy. “Man the Lifeline.” (*LP*). VIII-3: 7-8 Jan/Feb01
- Stroh, Elton. “Planning to Avoid Burnout.” (*PL*) I-1: 12-13. N92
- Strohm, Philip. “Christian Guidance Keynotes Individual Development.” (*TLE*) IX-4: 2-4. My69
- , “A Program for the Improvement of Instruction.” (*TLE*) XXIII-4: 12-13. My83
- Stueber, James + Staab. “Educational Alternatives.” (*TLE*) XXII-1: 12-15. O81
- Stuebs, Arden. “Train Up a Child in the Way He Is To Go.” (*TLE*) XIV-3: 24. F74
- , “Faithful is He That Calleth You, Who Also Will Do It.” (*LSB*) XXX-4: 1-2. My60
- Stuebs, Martin. “What Kind of Person Does God Choose for Service?” (*PL*) II-1: 36 Fa93
- Sutton, Donald. “More Will Come and More Will Grow.” (*PL*) I-1: 6. N92
- , “Every Family Needs Attention.” (*PL*) III-1: 4,8 Fa94
- Swantz, Ralph. “Problems in My Fifth/Six Grade Reading Course ....” (*LSB*) XIX-3: 5-6. F49
- Tacke, Rachel. “Art as I See It.” (*TLE*) XXXVII-4: 111-113 M97
- , “Papermaking: A Little Mess to Enhance Your Creative Classroom.” (*TLE*) XXXVIII-1: 27-32 O97
- , “Consider the Value of Coloring.” (*TLE*), XXXVIII-2: 59-60 D97
- , “Jesus Talk.” (*LP*) VI-2: 10-11 Nov/Dec98
- , “Adventures in Art: A New Spin on the Color Wheel.” (*TLE*). XL-1: 4-6 O99
- , “A Boundless Resource.” (*LP*) X-1: 28-29 Sep/Oct 02
- , “Walk on the Wild Side.” (*LP*) X-6: 4-5 Ju/Au 03.
- Tackmier, Bill. “Emphasize Baptism.” (*LL*). VIII-1: 18-19 Fa99
- Tank, James. “Luther’s Music and Hymns.” (*TLE*) VII-2: 8-11. D66
- Tech, Norman + Baer. “Communication: A Basic Skill.” (*TLE*) XVIII-3: 14-16. F78
- Teske, Mel. “Art Imitating Life.” (*LP*) X-1: 24 Sep/Oct 02
- Thaldorf, Jerald Mrs. “Mother’s Thoughts As Her Child Enters Kindergarten, A.” (*TLE*) XI-1: 9-10. O70
- Thiele, Tom. “Gospel Outreach Via the Mail.” (*PL*) IV-1: 37-38 Fa95
- Thiesfeldt, Gregory. “Improving School Climate.” (*TLE*) XXVIII-3: 64-68. F88
- , “Administrative Release Time (ART).” (*TLE*) XXXVIII-4: 121-126 My98
- Thiesfeldt, Steven. “Music in the Multigrade Classroom.” (*TLE*) XIX-2: 18-20. D78
- , “The Use of Discrepant Events in Teaching Science.” (*TLE*) XXXIV-1: 19-23 O93
- , “The Use of Historical Vignettes in Teaching Science.” (*TLE*) XXXIV-3: 90-92. F94
- , “Martin Luther College Strategic Plan: A Vision for Leadership: 2010+.” (*TLE*). XLVI-4: 118-125. M06.
- , “Using Demonstrations and an Observation Notebook to Teach Science Process Skills.” (*TLE*). XLVI-2: 45-48. D05.
- Thoma, Rebekah. “Music, Movement, and Mazart.” (*LP*). VII-6: 10-13 July/Aug 00
- Thompson, Glen. “Latin Across Three Time Zones.” (*TLE*) XXXV-2: 51-53 D94
- Thompson, Lloyd. “Playground Objectives.” (*TLE*) II-3: 6-7. F62
- Tiefel, James. “The Liturgical Style of Lutheran Worship.” (*PL*) I-2: 13-14 Sp93
- , “Unity in Our Worship Life.” (*PL*) II-1: 6-7 Fa93
- , “Cautious Optimism about Christian Worship.” (*PL*) II-1: 8-9 Fa93
- , “The Altar and Its Use.” (*PL*) III-1: 14-15 Fa94

- , “Sing the Verse of the Day!” (PL) III-2: 35-36 Sp95
- , “Worship and Evangelism: Strive for a Warm and Caring Atmosphere.” (PL) III-3: 17-18 Su95
- , “Hymns Nobody Likes.” (PL) IV-2: 48-49 Sp96
- , “Why Have a National Worship Conference?” (PL) IV-2: 50-51 Sp96
- , “Must Frustration Lead to Resignation?” (TLE) XXIX-1: 18-23. O88
- , “Come Worship Christ.” (LL)V-3:8-10 Sp97
- , “Worship Grows Up.” (LL). VIII-2:28-29 Wi00
- , “Setting Objectives for Worship.” (PL) I-1: 27-28. N92
- , “Worship’s Top Ten.” (LL) XI-3: 18-19 Sp03.
- Timm, E.W. “Hymn Study.” (LSB) X-3: 4-5. F40
- , “Helping Our Students to Appreciate Hymns.” (LSB) XIV-2: 4-5. D43
- Timmel, K. “Inspiration Address: Wisconsin State Teachers’ Conference.” (LSB) VII-2: 1-2. D36
- Timmermann, Donald. “Discover, Develop, and Use Your Spiritual Gifts.” (PL) I-3: 26-28 Su93
- Toepel, Eldor. “The New School Year — With Jesus.” (LSB) XXIX-1: 1. O58
- Toppe, Carleton. “Curriculum Revision At Northwestern College.” (TLE) II-2: 8-9. D61
- Toppe, Fred. “Praising God for Our Adversities.” (TLE) XXII-4: 19-22. My82
- Trapp, Thomas. “One Person.” (PL) I-3: 37-38 Su93
- Treder, Alan. “Let’s Teach Good Study Habits.” (TLE) XVIII-1: 23-24. O77
- Treptow, Earle. “God to Judah.” (TLE) XLII-4:100-103 My01
- Trettin, Emil. “For Ye Know the Grace of our Lord ... 2 Cor 8,9.” (LSB) X-2: 1-2. D39
- , “Are Our Commencement Programs Worthy of Our High Aims?” (LSB) XIII-3: 2-3. F43
- , “Twentieth Anniversary of the Lutheran School Bulletin.” (LSB) XX-4: 7. My50
- , “A Brief Summary of the History of Our Christian Day Schools.” (LSB) XXI-1: 1. O50
- , “The Testing Program in Our Schools.” (LSB) XXIII-2: 7-8. D52
- , “Paul G. Denninger.” (LSB) XXIV-1: 16. O53
- , “Gustav C. Groth.” (LSB) XXIV-1: 16. O53
- , “Louis Otto Keup.” (LSB) XXIV-2: 7. D53
- , “Testing Program Results 1951-52.” (LSB) XXIV-4: 10-12. My54
- , “John A. Bushman.” (LSB) XXIX-1: 7. O58
- , “Second Annual Workshop for School Visitors.” (LSB) XXIX-2: 6. D58
- , “Bible History for Christian Day Schools.” (LSB) XXV-2: 7. D54
- , “The Testing Program Results for 1953-1954.” (LSB) XXV-3: 6. F55
- , “Our Synod-Wide Testing Program in Our Schools.” (LSB) XXV-4: 8. My55
- , “Book Review.” (LSB) XXVII-2: 5,7. D56
- , “Theodore Schultz.” (LSB) XXVII-3: 12. F57
- , “Suggested Rainy Activities.” (LSB) XXVIII-1: 6-7. O57
- , “The Junior Northwestern.” (LSB) XXVIII-1: 7. O57
- , “Will You Help.” (LSB) XXVIII-2: 6-7. D57
- , “Ernst F. Schulz.” (LSB) XXVIII-3: 12. F58
- , “Teacher’s Manual for ‘Bible Stories.’” (LSB) XXVIII-4: 3-5. My58
- , “The First School Visitors’ Workshop.” (LSB) XXVIII-4: 6-7. My58
- , “Challenging Superior Spellers.” (LSB) XXX-2: 4-6. D59
- Troge, Benjamin. “Effective Leadership and Supervision in Today’s Schools.” (TLE). XLVII-3: 79-84. F07.
- Tullberg, Helen. “What a Sunday School Teacher Expects from Teachers Meetings.” (TLE) II-2: 19-20. D61
- Tullberg, Paul + Olson. “Still Hungry!” (TLE) XXVII-1: 3-4. O86
- Uhlig, Ruth. “The Role of Santa Claus in the Christian Day School.” (LSB) XX-1: 5-7. O49
- Vaccarella, Lee. “Grow in the Grace of Giving” (PL) II-2: 40-41 Sp94
- Valleskey, David. “Leadership Training.” (TLE) XI-1: 7-8. O70
- , “Lending to the Lord What is His.” (TLE) XI-2: 2-3. D70
- , “Christian Day School and Sunday School.” (TLE) XIV-3: 5-6. F74
- Valleskey, Wilmer. “Let’s Look Ahead—and Plan Ahead.” (TLE) V-2: 13-15. D64
- Van Laar, Myrtle. “Picture File, The.” (TLE) X-1: 12-13. O69
- Van Stelle, Virginia. “The Story of Jesus: Its Impact on My Life and My Classroom.” (TLE)XXXVIII-3:94-96 F98
- Vieth, Victor. “Confront the Horrendous Evil.” (LP). VII-6: 6-8 July/Aug 00
- Voecks, Victor. “Is the Delinquency Problem Hopeless?” (LSB) XIV-4: 1-2. My44
- Vogel, Heinrich. “Noah’s Curse.” (TLE) XXVI-2: 19-21. D85
- , “What is the Church’s Responsibility ... Secondary Education.” (LSB) XXVI-3: 4-7. F56
- Volpe, Laurie, Mark Dewalt. “Music and Literature in the Classroom: A Powerful Combination.” (TLE) XXXIX-1: 23-27 O98
- Voss, Arthur. “State Teachers’ Conference Sermon.” (LSB) VI-2: 1-2. D35
- Voss, Carol. “Teaching the Word of God to Retarded Persons.” (PCE) I-1: 12-13. Su89
- Voss, Robert. “Encouraging Our Pupils For the Teaching and Preaching Ministry.” (TLE) II-3: 10-12. F62
- , “The Church Meeting, Its Challenge.” (TLE) V-4: 14-16. My65
- Voss, Robert James. “Steps toward Adult Spiritual Growth.” (PL) I-3: 23-24 Su93
- Voss, Verne. “The Pilgrim Crusade: A Member Reclamation Program.” (PL) I-1: 30-31. N92

- . "Witness to Non-Christian Family Members." (PL) I-2: 35-36 Sp93
- . "Tincture of Pharisee and other Nagging Maladies." (LP) IX-4: 8-9 Ma/Ap 02
- . "I Don't Know Where to Turn Anymore." (LP) XI-3: 6-8 Jan/Feb04.
- Wagenknecht, DeLyn. "Love Signs." (LP). VII-3:14-15 Jan/Feb 00
- Wagenknecht, Myrl. "Aaron's Arms (1)." (PL) II-3: 4-5,7 Su94
- . "Aaron's Arms (2)." (PL) III-1: 37-39 Fa94
- . "Aaron's Arms (3)." (PL) III-2: 43-44,46 Sp95
- Wagner, Mark. "From Tedious to Tremendous." (TLE) XXXII-4: 113-118. My92
- . "Worthy to be Fathers." (LL) VII-1: 20-21 Fa98
- Wagner, Wayne. "A Children's Ascension Day Service." (PCE) I-4: 60-61. Sp90
- . "Handbells in Our Churches and Schools." (TLE) XX-2: 17-19. D79
- . "Preparing a Personal Philosophy of Music Education ... Christian Teachers.." (TLE) XXII-2: 19-21. D81
- . "Teaching Music With Ten Thumbs." (TLE) XXIII-1: 9-11. O82
- . "Music Education Survey Results." (TLE) XXIV-2: 14-17. D83
- . "New Organ Music Worth Investigating" (TLE) XXVI-II-3: 10-12. F87
- . "Music in our Churches and Schools: The Perspective of Tradition." (TLE) XXXV-4: 118-125 My95
- . "Not Unto Us." (TLE) XLII-3:93-96 F01
- Wagner, Wayne & Edward Me. "The New WELS Elementary School Music Curriculum." (TLE) XXXIII-1: 26-32. O92
- Wallander, Laura. "Moms Working It Out." (LP). VIII-2: 10-11 Nov/Dec00
- Wandersee, James. "Wait Time Research—Can it Help you Teach Science?" (TLE) XIX-4: 16-17. My79
- . "Should You Take a Correspondence Course?" (TLE) XXI-3: 20-21. F81
- . "Let's Take a Science Field Trip!" (TLE) XXII-3: 11-13. F82
- . "Can You Spare a Nanosecond?" (TLE) XXIX-4: 75. My89
- Wandersee, James et al. "Book Review." (TLE) XXVI-4: 10-11. My86
- Warnecke, Richard. "He Needs God's Love Today." (LL) VII-2: 22-23 Wi99
- Warnke, Harold. "A Survey of Lutheran High School Religion Courses." (TLE) I-1: 9-10. O60
- . "The Lutheran High School in Our Synod." (TLE) I-2: 9-10. D60
- . "In-Service Training Course." (TLE) II-2: 10. D61
- . "High and Impregnable Wall, The." (TLE) II-4: 10-12. My62
- . "Improving Our Faculty Meetings." (TLE) III-2: 10-12. D62
- . "Let's Improve Our Teacher Meetings." (TLE) IV-3: 12-14. F64
- . "Unsung Hero." (TLE) V-3: 8-10. F65
- . "Let's Study Romans." (TLE) VI-2: 12-14. D65
- . "God's Grace in the Story of WELS Area High Schools." (TLE) XV-1: 11-14. O74
- . "God's Grace has Guided Us." (TLE) XV-2: 6-8. D74
- . "God's Grace in the Future of Our WELS Lutheran High Schools." (TLE) XV-4: 14-16. My75
- . "Dr. Luther's Small Catechism: Its Value." (TLE) XX-1: 5-6. O79
- . "Dr. Luther's Small Catechism: Its Use." (TLE) XX-2: 5-6. D79
- Wasser, Craig. "One Thing at a Time." (LL). VIII-4: 22-23 Su 2000
- Wasser, Robert and Bonnie. "The Devil is Prowling." (LP) VI-4: 10-11 March/April99
- Waterstradt, Ronald. "On Being Great in the Kingdom." (TLE) XX-3: 1. F80
- Weber, Joanne. "Book Fair." (PL) III-3: 35-36 Su95
- Wegner, Walter. "Vasteras for Variety." (TLE) I-1: 12-13. O60
- . "Feed My Lambs." (LSB) XXVI-4: 1-3. My56
- Weishahn, Milton. "Physical Education Program, A." (TLE) III-2: 2-3. D62
- Weiss, Monica. "When the Children Play, the Teacher Should ...." (TLE) XXXVII-1: 28-30 O96
- Welch, Thomas. "In the Face of Defeat." (LP) III-6: 5. July/Aug 96
- Wendland, David. "Reflections on My First Year." (TLE). XLV-1:15-18. O04.
- Wendland, E.H. "They Sang Like Angels: Teaching Sunday School in the Africa." (TLE) XVII-2: 13-15. D76
- . "Rejoice in the Lord Always ...." (LSB) XXIII-2: 1-2. D52
- Wendland, Kathie. "Trends for Women." (LL) XI-3: 22-23 Sp03.
- Wendland, Paul. "If the Bible is Clear, How Come So Many Don't Get It?" (TLE) XXXVI-4: 119-121 M96
- . "Walls and Bridges." (TLE) XXXVII-1: 4-9 O96
- Wendland, Paul O. "Gospel Freedom and Contemporary Music (1)." (TLE) XXXIII-2: 56-62. D92
- . "Gospel Freedom and Contemporary Music (3)." (TLE) XXXIII-3: 68-71. F93
- . "Gospel Freedom and Contemporary Music (3)." (TLE) XXXIII-4: 100-105. My93
- Wendland, Shirley. "Practical Application of the Third Commandment to School Life." (LSB) XXX-4: 3-4. My60
- Wendler, David. "The Expectation Map." (TLE) XXIX-3: 71. F89
- . "Don't Put All Your Eggs in the Standardized Testing Basket." (TLE) XXXIII-4: 106-112. My93
- . "Authentic Assessment." (TLE) XXXIV-2: 51-54 D93
- . "MLC-Yesterday, Today, Tomorrow." (TLE). XLV-3: 70-73. F05.

- Wenzel, Kenneth. "Children's Christmas Eve Service Outline." (*TLE*) XXVI-1: 8-10. O85
- Wendt, Michael. "How to Web the Right Way." (*TLE*). XLVI-3: 70-76. F06.
- Werner, F.A. "Gospel Integrates, The." (*TLE*) III-3: 2-3. F63
- Werre, Jennifer Meyer. "Profiles in Ministry: The Great Plains." (*TLE*) XXXIII-3: 93-94. F93
- Werre, Luke. "The Apple and the Apple Tree." (LP) X-4: 24 Ma/Ap 03.
- Wessel, Howard. "Objectives-Functional Guide or Vague Generality." (*TLE*) IX-2: 8-9. D68
- . "Listening—A Neglected Skill." (*TLE*) X-1: 5-6. O69
- . "Home-School Cooperation in Remedial Reading." (*TLE*) XI-1: 16-17. O70
- . "Some Thoughts on Spelling Motivation." (*TLE*) XI-2: 8-9. D70
- . "Individualizing Reading-A Possibility in Multi-grade Classroom." (*TLE*) XI-3: 11-12. F71
- . "Preparation for Reading in Social Studies." (*TLE*) XII-2: 6-7. D71
- . "Purposeful Reading in Social Studies." (*TLE*) XII-3: 8-10. F72
- . "Teach them Note-Taking." (*TLE*) XIII-2: 9-10. D72
- . "Oral Reading by the Teacher." (*TLE*) XIII-4: 14-15. My73
- . "Objective Observation of Teaching Behavior." (*TLE*) XIV-1: 12-13. O73
- . "Estimating Readability by the Cloze Procedure." (*TLE*) XV-2: 13-14. D74
- . "More on Readability." (*TLE*) XVI-1: 9-10. O75
- . "Student-Teaching—a Brief Overview." (*TLE*) XVI-2: 11-12. D75
- . "Three Aids for Remedial Reading." (*TLE*) XVI-4: 12-13. My76
- . "Exchange Your Papers." (*TLE*) XVII-2: 9-10. D76
- . "Selecting Materials for the Reading Program." (*TLE*) XXIII-2: 5-7. D82
- . "Twenty-five Years of Cooperation." (*TLE*) XXIX-4: 91-94. My89
- . "An Appreciation of Classroom Supervisors." (*TLE*). XL-1: 12-13 O99
- Westendorf, B.J. "The Rehabilitation of the Home." (*LSB*) VII-3: 1-2. F37
- Westendorf, Rolfe. "Camping With Christ at Killarney." (*TLE*) V-3: 11-12. F65
- . "Who's Minding the Sunday School?" (*TLE*) XV-1: 17-20. O74
- . "Physical Discipline in Christian Schools." (*TLE*) XXII-3: 13-15. F82
- . "The Men's Choir Sings Again." (*TLE*) XXII-3: 22-24. F82
- . "Tuition Dilemma, The." (*TLE*) XXV-3: 13-15. F85
- . "Ars Pro Artis?" (*TLE*) XXV-3: 15. F85
- . "One Income or Two?" (*TLE*) XXVII-3: 14-16. F87
- . "How do You Fix the Family?" (*LL*) VI-1:8-10 Fa97
- . "Helping Hurting Families." (*LL*) VII-1: 15-17: Fa98
- Westendorf, S.E. "What is the Status of ... Who Signs a Marriage Contract? (1)." (*LSB*) XII-3: 2-3. Mr42
- . "What is the Status of ... Who Signs a Marriage Contract? (2)." (*LSB*) XII-4: 1-3. My42
- . "A Root Out of Dry Ground." (*LSB*) XVI-3: 2-3. F46
- . "Salvation Through Grace." (*LSB*) XXI-3: 1-2. F51
- . "Commencement Address - DMLC." (*LSB*) XXIII-4: 1-2. My53
- Westendorf, Thomas. "More Than a Church Member: Training Confirmands to Be Disciples." (*TLE*) XXX-4: 81-86. My90
- Westendorf, W. W.. "Post-Confirmation Instruction." (*TLE*) III-3: 15-16. F63
- Westerhaus, G.A. "Tracing Christian Education in the Early Church (1)." (*LSB*) XIV-1: 1-2. S43
- . "Tracing Christian Education in the Early Church (2)." (*LSB*) XIV-2: 3-4. D43
- Westerhaus, Martin. "Decision Theology—What Is It and How do You Recognize It?" (PL) IV-1: 23-24 Fa95
- Westphal, Sarah. "Once Around the Block." (*TLE*) XXXVII-2: 51-52 D96
- Westra, Charles. "Plan to Share." (*LL*). VII-4: 4-7 Su99
- Whaley, Cindy. "A Balanced Approach to Reading Instruction." (*TLE*). XLIV-1: 18-28. O03
- Whited, Sandra. "Lindamood-Bell Reading Therapies." (*TLE*). XLV-4: 105-108. M05.
- Wichmann, W.F. "What Do I Get Out of It?" (*TLE*) III-1: 2-3. O62
- . "My Call and the Children of My Congregation." (*LSB*) XIV-3: 1-2. F44
- . "How Our Children May See Evil of Boy Scout Through Catechism." (*LSB*) XXIV-4: 3-6. My4
- . "Your Life is Hid With Christ in God." (*LSB*) XXV-1: 1-2. O54
- Wicke, Harold. "We Should Fear, Love, and Trust in God Above All Things." (*LSB*) XXIX-3: 3-5. F59
- Widmann, Warren. "Outreach: A Way of Life at Grace." (PL) IV-2: 17-18 Sp96
- Wichmann, R. L. "Promoting Interest in Missions in our Area High Schools." (*TLE*) VII-1: 16-18. O66
- Wierschke, Carol. "Books — Books — Books." (*TLE*) XIV-4: 13-14. My74
- . "Look for a Book?" (*TLE*) XV-3: 11-12. F75
- Wietzke, W.H. "Old Adam—Improved or Crucified?" (*TLE*) III-4: 2-5. My63
- Wilbrecht, Adolph. "Benefits Derived from a Christian Day School Education." (*TLE*) VIII-1: 2-3. O67
- Wildauer, Martin. "I M 4 M W." (PL) IV-2: 19,21 Sp96
- Wilde, Annette. "Old Henry (Joan Bloss)." (*TLE*) XXX-1: 20-21. O89
- Wilkes, Michael. "Love People—Manage Activity." (PL) IV-1: 21-22 Fa95
- Wille, Gary. "An Idea that Works." (PL) II-2: 12-13 Sp94

- Willems, Paul. "Is Anyone Out There Teaching Them How to Study?" (*TLE*) XIX-2: 15-17. D78
- . "Is There a Self-Study in Your Future?" (*TLE*) XXIII-4: 14-15. My83
- . "Opening Doors." (*TLE*) XXVI-3: 16-18. F86
- . "Firming the Foundations." (*TLE*) XXVI-4: 4-8. My86
- . "Teacher Credentials." (*TLE*) XXVIII-3: 60-62. F88
- . "What Can I Get Out of It?" (*TLE*) XXVIII-4: 93-94. My88
- . "Attitudes and Safety in the Science Classroom." (*TLE*) XXXII-3: 87-91. F92
- . "Try Using Rubrics." (*TLE*) XXXIV-1: 11-15 O93
- . "What's Wrong With It?" (*TLE*) XXXIV-4: 104-106 My94
- . "Paul Willems Responds." (*TLE*) XXXV-1: 16 O94
- . "Demonstrating God's Handiwork in His Creation." (*TLE*) XXXV-2: 40-43 D94
- . "Teachers as Learners." (*TLE*) XXXVI-2: 41-43 D95
- . "Where's the Applause." (*TLE*) XXXVII-2: 60-64 D96
- . "The Minnesota Graduation Standards." (*TLE*) XXXVII-4: 107-110 M97
- . "Science as Process." (*TLE*) XXXVIII-2: 36-41 D97
- . "OBE and Me: What is OBE?" (*TLE*) XXXIII-1: 12-15. O92
- . "Nekketsu Sensei." (*TLE*) XXXIII-2: 38-40. D92
- . "Pushing the Envelope." (*TLE*) XXXIX-1: 10-12 O98
- . "Poetry, Teaching, and Emotions." (*TLE*) XXXIX-2: 51-55 D98
- . "What Do You Mean, 'You Have a Call?'" (*TLE*). XL-1: 25-27 O99
- . "ADD." (*TLE*). XLI-2: 43-52 D00
- . "Service With a Smile." (*TLE*). XLI-3: 68-69 F01
- . "Burnout Happens." (*TLE*). XL-2: 44-47 D99
- . "Teaching With Patterns of Poetry." (*TLE*) XLII-4: 119-121 My01
- . "Why Do Believers Suffer?" (*TLE*) XLII-2: 38-43 D01
- . "Good Wine." (*TLE*) XLII-1: 4-5 O01
- . "Science as Philosophy." (*TLE*) XLIII-3: 70-72 F03.
- . "Who Pushed You?" (*TLE*) XLIII-3: 124-125 My03.
- . "A Model or Reality." (*TLE*). XLIV-2: 58-61. D03. Science.
- . "Choices and Decisions." (*TLE*). XLIV-1: 29-31. O03.
- . "People." (*TLE*). XLV-2: 38-49. D04.
- . "The L Speaks." (*TLE*). XLIV-4: 123-124, M04.
- . "Where Experiments End." (*TLE*). XLV-4: 102-104. M05.
- . "Why Write?" (*TLE*). XLIV-3: 79-80 F04.
- Willitz, Joel. "Summer Vacation is Near ... Rest." (*ELS*) I-3: 1 Sp98
- Wilson, Julie & Bruce Becker. "A Generation in Need of Jesus." (*LL*) VI-6: 20-21 Su98
- Winkel, Timothy. "Self-Esteem." (LP) III-6: 12-13. July/Aug 96
- Winkler, Kathleen. "The 'Lonely' Family." (LP) III-1: 12-13. Sep/Oct 95
- Winter, Louis. "Mentally Retarded, The." (*TLE*) IX-4: 10-17. My69
- Winters, Richard. "Connecting a youth Rally to the Congregation." (PL) IV-2: 44 Sp96
- . "Use the Telephone." (*LL*). IX-2: 22-23 Win01
- Witt, Steven. "Fifth and Sixth Graders' Reaction to Literature Circles." (*TLE*). XLVI-1: 23-30. O05
- Witte, Dale. "The Church Musician—Nurturing the Congregation." (*LL*) VI-2: 28-29 Wi98
- Witte, Steven. "One Person at a Time." (*LL*) XII-3: 4-7 Sp04.
- Wobeck, Clyde. "Teaching Responsible Citizenship." (*TLE*) VIII-2: 6-7. D67
- Woldt, Al. "Tracking Mobile Members." (PL) I-2: 31 Sp93
- . "Crossing Generations." (PL) III-1: 41-43 Fa94
- . "Getting With It!" (PL) III-2: 45 Sp95
- . "Barriers—Imaginary or Real?" (PL) III-3: 44-45 Su95
- . "Joy in Ministry." (PL) I-3: 40 Su93
- . "Curriculum—Who's Responsible?" (*TLE*) III-4: 10-11. My63
- . "How Shall We Train Our Retarded Child?" (*TLE*) XIV-4: 11-12. My74
- . "Special Ministries—Getting Involved." (*TLE*) XVII-3: 5-6. F77
- . "Dilemma of Being Normal." (*TLE*) XXIX-2: 28-32. D88
- . "Reach Out Through Special Ministries." (*LL*) V-1: 28-29 Fa97
- . "Serving All God's Children." (*LL*) X: 1 28-29 Fa01
- Woldt, Betsy. "A Parent's Picture of Preschool." (*TLE*) XXXII-3: 77-79. F92
- Woldt, Michael. "Question and Answer." (LP) III-1: 11. Sep/Oct 95
- . "Question and Answer." (LP) III-2: 15. Nov/Dec 95
- . "Question and Answer." (LP) III-3: 10. Jan/Feb 96
- . "Question and Answer." (LP) III-4: 10. Mar/Apr 96
- . "Question and Answer." (LP) III-5: 10. May/June
- . "Question and Answer." (LP) III-6: 10. July/Aug 96
- . "Question and Answer." (LP) IV-6: 15 July/Aug 1997
- . "Question and Answer." (LP) V-1: 15 Sep/Oct 1997
- . "Question and Answer." (LP) V-2: 16 Nov/Dec 1997
- . "Question and Answer." (LP) V-3: 15 Jan/Feb 1998
- . "Question and Answer." (LP) V-4: 13 Mar/April 1998
- . "Question and Answer." (LP) V-5: 13 May/June 1998
- . "Question and Answer" (LP) IV-6: 14
- Wolf, Alison. "Special Needs Children: A Parent's Perspective." (*TLE*) XLII-4: 115-117 My01
- Wolff, Robert. "Christian Education for Them Too?" (*TLE*) XXII-2: 23-24. D81
- Wolle, Rhoda. "Teens: Sleep, Dreams, and Education." (*TLE*) XLII-3: 91-92 F01
- Wolfgramm, Arno. "Part of God's Plan." (*LL*). IX-3: 4-7 Sp01
- Wolfgram, Wendy. "The Deaf Lead the Deaf." (*LL*) XII-3: 28-29 Sp04.

- Woltmann, William. "Teacher-Pupil Relations in the Intermediate Grades." (*TLE*) I-1: 6-7. O60
- . "Children's Participation in Congregational Activities." (*TLE*) XI-4: 12-13. My71
- Worgull, David. "Individual Memory Course." (*TLE*) XII-3: 15-17. F72
- Wormer, Debra + Busack. "A Look Inward: School Self-study." (PL) III-2: 29-30 Sp95
- Wormer, Diane + Busack. "A Look Inward: School Self-Study." (PL) II-2: 14 Sp94
- Wulff, Frederick. "A Good Social Studies Textbook." (*TLE*) XXXIV-1: 27-32 O93
- . "Weaknesses in Social Studies Textbooks." (*TLE*) XXXIV-4: 121-128 My94
- . "Movies as Histor." (*TLE*) XXXVIII-4 113-117 My98
- . "The Parallels Between Islam and Mormonism." (*TLE*) XLIII-3: 110-115 My03.
- . "The Controversy Over Standards." (*TLE*). XLV-1:6-10. O04.
- . "Christian Politics!: The Best For Both Worlds." (*TLE*). XLVII-1: 6-10. O06.
- . "Build Bridges to Other Cultures." (*TLE*). XLIV-3: 72-78 F04.
- . "Sociology With an S (Like in Sin)," (*TLE*). XLVI-2:38-44. D05. .
- . "Teaching Social Studies Without a Negative Paradigm," (*TLE*). XLV-2: 50-54. D04
- Yahnke, Beverly. "Top Ten Ways to Guarantee Shallow Listening." (LP). VIII-1: 8-9 Sep/Oct00
- Yarbrough, Kristine. "WELS Teachers Across the Country—Unite!" (*TLE*) XXXIV-2: 62 D93
- . "United We Stand." (*TLE*) XXXV-1: 23-24 O94
- Yotter, Harold. "Mathematics Balance: A Useful Manipulative, The." (*TLE*) XVII-1: 23-24. O76
- Zabel, David. "Grow Sunday School Teachers." (*LL*)VI-3:26-27 July/Aug98
- Zabell, Jon. "Worship Over Already?" (*LL*) XI-2: 24-25 Wi03.
- Zahn, Al. "Driving in Circles? Developing a Map for Youth Ministry." (PL) I-2: 25-26 Sp93
- Zahn, Meilahn. "Plea for a Program, A." (*TLE*) IX-2: 14-16. D68
- . "Music—or Just a Song?" (*TLE*) IX-3: 17-19. F69
- . "Why the Great Neglect?" (*TLE*) V-2: 16-18. D64
- . "Is Rhythm the Forgotten Element in Your Classroom?" (*TLE*) X-1: 19-21. O69
- Zahn, Ronald. "Role of the Sunday School Superintendent, The." (*TLE*) XIX-3: 5-7. F79
- Zank, Joel. "The Millennium Bug" (LP). VI-6:15 Ju/Au99
- Zanto, Stephen. "Calculators in the Classroom." (*TLE*) XXVIII-2: 43-46. D87
- Zarling, Irene. "Goals of Achievement in the Kindergartens of Our Lutheran School." (*LSB*) XI-3: 5-6. F41
- Zarling, Mark. "Elisha Sandals." (*LL*) XI-4: 18-19 Su03.
- Zehms, Elmer. "Teach Them Simply." (*TLE*) III-2: 13-14. D62
- Zehms, Roger. "Sunday School Teachers' Workshop: The Home-grown Variety." (PCE) III-1: 6-7. Su91
- . "Discipline in the Sunday School Classroom." (*TLE*) XXVII-2: 15-18. D86
- Zeitler, John. "Ministering to the Institutional Member." (PL) IV-3: 37-38 Su96
- Zermuehlen, Mrs. Oscar. "Developing a Christian Attitude Toward Holidays." (*LSB*) XXX-1: 6-7. O59
- Ziemer, Carl. "Special Care: Special People." (*LL*). VII-3: 26-27 Sp99
- . "Good Trend or Bad." (*LL*) XI-3: 28-29 Sp03.
- . "Speak Up." (*LL*) XII-1: 18-19 Fa03.
- . "Serving the Military." (*LL*) XI-4: 28-29 Su03.
- . "Love Is Correct Doctrine." (*LL*). XIII-2 28-29 Wi05.
- Ziesemer, Richard. "Part-time Agency for Collegiates, A." (*TLE*) XV-2: 19-20. D74
- Zimmerman, Donald. "My Diary." (*TLE*) XXVI-1: 20. O85
- Zimmerman, Fred. "Train a Child in the Way He Should Go." (PL) IV-3: 19 Su96
- . "Lent: A Perfect Time to Right Wrong Ideas." (*TLE*) XXIV-3: 1. F84
- . "He Will Be With Them Also." (*TLE*) XXIV-4: 1. My84
- . "Train a Child in the Way He Should Go, And When He is Old .." (*TLE*) XXV-1: 1. O84
- . "Faith—The Most Time-Honored Celebration of Christmas." (*TLE*) XXV-2: 1. D84
- . "How Jesus Graduated His First Disciples at His Ascension." (*TLE*) XXV-4: 2-3. My85
- Zimmerman, Jane. "A Special Kind of Class." (PL) I-1: 45-46. N92
- Zimmerman, Natalie + Jaco. "The Relationships of Adolescent Literature." (*TLE*) XXXVI-2: 57-59 D95
- Zimmermann, Doris. "Primary Grade Child and His Teacher, The." (*TLE*) VIII-4: 6-7. My68
- Zimmermann, Fred. "Ready for Christmas and Ready for Christ." (*TLE*) XXIV-2: 1. D83
- Zimmermann, Mardy. "A Very Special Ministry." (*LL*) VII-2: 24-25 Wi99
- Zimmermann, Walter. "Teaching Children to Speak Out About Christ." (*TLE*) XXIV-3: 2-4. F84
- Zink, Robert. "Bible Class—The Best Way to Serve the Young People of Our C." (*TLE*) XII-2: 17-19. D71
- Zink, Waldemar. "Sunday School Conferences." (*TLE*) XII-1: 16-17. O71
- Zohar, Susan. "Homeschoolers Have an Agenda." (*TLE*). XLI-1: 20-21 O00
- Zubke, Dave. "Sunday School on Vacation?" (*LL*) X-2: 26-27 Wi02

## Descriptors

**Achievement:** achievement in schools; see also **evaluation, tests**

**Administration:** administration of a school, of the district, of the synod, of a part-time agency; see also **principals, supervision**

**Adult:** adult education, adults in the congregation

**Aides:** use of adults or children as teaching aides

**Arithmetic:** methods, curriculum, and materials in arithmetic

**Art:** methods, materials, and curriculum in art

**Assessment:** assessment of schools, teachers, pupils, curriculum; school self-studies

**Assignments:** homework, assignments in school

**Athletics:** curriculum, philosophy, competition in, activities of, playgrounds; see also **physical education, competition**

**Attendance:** church, school, part-time agencies

**Audiovisual:** materials, selection and use of audiovisual materials

**Band:** rhythm, programs, school

**Bible History:** teaching of, curriculum, materials

**Bible Study:** family, adult, children, classes, youth, Bible reading, methods of; see also **Bible**

**Book Review:** reviews of trade books, children's books, books in various subject areas

**Call:** procedures for, guidelines for, ethics of; see also **ethics, ministry**

**Catechism:** Luther's catechism, teaching, materials

**Certification:** regulations, state, synod

**Children:** development, activities, characteristics, teacher-pupil issues; see also **development**

**Choir:** directors, junior, adult, high school, other kinds of choirs

**Christian Education:** general articles, philosophy of Lutheran and Christian education

**Christmas:** services, songs, activities, gifts

**Church and State:** government aid, laws, religion and public schools; see also **government aid**

**Classroom:** atmosphere, learning centers, multigraded, grouping, departmentalization; see also **multigraded**

**College:** students, curriculum, history

**Continuing Education:** graduate study, extension work

**Communication:** as a skill, as a subject; see also **listening, writing, speech**

**Competition:** in the school, in athletics; see also **athletics**

**Computers:** use of, materials for

**Confirmation:** pastors and confirmation classes, adult confirmation

**Congregation:** worship, activities of the congregation

**Counseling:** in school, guidance, counseling behavioral problems

**Creation Science:** relationship and opposition of the Bible and science

**Creativity:** identifying, teaching children

**Curriculum:** in various subjects, study of, part-time agencies, individualized, objectives, teaching from Scriptural viewpoint

**Development:** of children, in various areas; see also **children**

**Developmentally Challenged:** teaching, materials for; see also **exceptionality**

**Devotions:** in school and home

**Discipline:** child, part-time agencies, school

**Doctrine:** articles on a particular doctrine

**Elderly:** using the elderly in congregations, ministry to elderly

**Elementary School:** support of, home and, the elementary school and part-time agencies

**Emotions:** withdrawn children, mental health

**Ethics:** teacher, call, teacher and his family, moral issues

**Evaluation:** report cards, tests, grading, evaluation of the curriculum

**Evangelism:** enrollment policies, evangelism in the inner city, teaching evangelism; see also **missions**

**Exceptionality:** the gifted, learning disabled, programs for, materials, mentally retarded; see also **gifted, mental retardation, speech**

**Faculty:** inservice training of, meetings; see also **teachers, inservice**

**Finances:** salaries, support of school, government aid, tuition

**Foreign Language:** teaching, learning of

**Gifted:** identifying, teaching, materials for; see also **exceptionality**

**Government Aid:** kind, acceptance of, policies for; see also **finances**

**High Schools:** curriculum, history of, teachers, methods

**Historical:** history of synod, schools, persons, Luther

**History:** teaching, history as a subject

**Home:** parents, devotions, home-school cooperation; see also **parents**

**Humanism:** dangers of; see also **values, world**

**Hymns:** organists, playing, hymnals, teaching hymns, hymnology

**Individualization:** methods, curriculum

**Inservice:** conferences, Sunday school, faculty; see also **faculty**

**Instruction:** methods, motivation, in various subjects, observation of

**Kindergarten:** curriculum of, teaching in

**Language Arts:** teaching, content of, materials; see also **literature**

**Law and Gospel:** moralizing, sanctification

**Listening:** teaching, as a skill; see also **communication**

**Literature:** books, teaching, book reviews; see also **language arts**  
**Liturgy:** teaching of, accompanying the liturgy, see also **worship**  
**Martin Luther:** Luther on various topics, articles about Luther, teaching Luther, writings of Luther  
**Materials:** for teaching, teaching aids, materials in part-time agencies  
**Meditation:** meditational writings  
**Memory Work :** teaching of, kinds of  
**Methods:** in various subjects, a broad descriptor for different kinds of methods  
**Ministry:** call, ethics, women, recruitment for; see also **call**  
**Miscellaneous:** a descriptor for articles on travel, or other categories not covered in the list  
**Missions:** teaching, world missions, mission festival; see also **evangelism**  
**Motivation:** motivation in general, motivation in specific subjects  
**Multicultural:** teaching, incorporating, materials for  
**Multigraded:** subjects in a multigraded classroom, teaching in a multigraded classroom; see also **classroom**  
**Music:** in school, in church, in services, teaching music, playing music, curriculum in music, rock music  
**Obituaries:** obituaries of teachers  
**Objectives:** objectives and the curriculum, objectives in various subjects  
**Organ:** playing the organ, kinds of organs, organs in the service, music for the organ  
**Parents:** parents and teachers, reporting to, responsibilities of, home-school cooperation; see also **home**  
**Part-time Agencies:** Sunday school, vacation Bible school, adult, teachers in, Pioneers  
**Pastor:** pastor and teacher relationship, the pastor and the school, recruitment for; see also **relationships**  
**Penmanship:** content of teaching  
**Philosophy:** of the Christian school, of Christian education, Christian philosophy  
**Physical education:** teaching, objectives for, curriculum in; see also **athletics**  
**Preschool:** teaching, purpose of, curriculum, administration of  
**Principals:** supervision, administration, qualifications; see also **administration, supervision**  
**Prayer:** types, proper  
**Psalms:** teaching the psalms, kinds of psalms  
**Public schools:** religion in the public school, dangers of public schools, public schools and Christian schools; see also **humanism, values**  
**Questions:** use of questions, kinds of questions  
**Reading:** methods, curriculum, at various levels, readiness, remedial  
**Recruitment:** for the elementary school or part-time agency, promoting the elementary school or part-time agency  
**Reformation:** teaching the Reformation, history of the Reformation  
**Relationships:** pastor and teacher, teacher and teacher, pupil and teacher, parent and teacher, home and school, Sunday school and home, Sunday school and elementary school, principal and teacher  
**Religion:** curriculum in, teaching, materials, teacher qualifications  
**Resignations:** resignations from teaching, reasons for resignations; see also **ethics**  
**School Enrollment:** statistics on school enrollments  
**Science:** curriculum in, teaching, sex education, content of  
**Services:** music in the service, kinds of services; see also **worship, liturgy**  
**Singing:** school music, teaching singing, materials for singing  
**Slow Learners:** teaching the slow learner, materials for the slow learner  
**Social Studies:** methods in, curriculum, materials  
**Speech:** teaching speech, speech problems; see also **communication, exceptionality**  
**Spelling:** methods in, materials for, curriculum  
**Stewardship:** teaching stewardship, materials for  
**Study Skills:** kinds of, teaching study skills  
**Sunday School:** materials, teachers, home and the Sunday school, training teachers, the Sunday school and the elementary school; see also **teachers**  
**Supervision:** school visitation, inservice, observation of classrooms, student teaching; see also **principals, administration**  
**Teachers:** relationships of teachers with others, women, professionalism, teachers in part-time agencies, call, ethics; see also **relationship**  
**Technology:** computer use, internet issues  
**Teenagers:** development, attitudes, teaching  
**Test Results:** annual listing of synod test results  
**Tests:** teacher-made tests, reporting test results, standardized tests; see also **achievement, evaluation**  
**Textbooks:** evaluation of textbooks, selecting textbooks, using textbooks  
**Vacation Bible Schools:** teaching in, materials for  
**Values:** secular values, teaching values, value clarification, general ethics; see also **public schools, humanism, world**  
**Women:** women in the church; see also **teachers**  
**World:** influence of the world, the world and the teacher, the child, the school; see also **humanism, values**  
**Worship:** kinds of worship, teaching worship; see also **liturgy, services**  
**Writing:** teaching, methods for teaching writing, creative writing; see also **language arts**  
**Youth:** kinds of youth groups, ministry to youth, teaching youth

## Subject Index

### Achievement

- Anonymous. "Report of the Committee on Testing." (*LSB*) XXX-4: 8. My60
- Becker, Siegbert. "Danger of Overemphasizing Academic Achievement." (*TLE*) XIV-4: 2-5. My74
- CPS. "Achievement Test Results." (*PL*) IV-1: 44 Fa95
- Ferch, Dawn. "Brain-based Learning—Rediscovered." (*TLE*) XXXVII-1: 20-22 O96
- Isch, John. "Mastery Learning." (*TLE*) XVIII-3: 20-22. F78
- Meyer, F.W. "We Have the Answer." (*LSB*) IX-3: 6. F39
- Rauschke, Armin. "Teacher-Constructed Achievement Tests (1)." (*LSB*) XXII-1: 5-7. O51
- Rauschke, Armin. "Teacher-Constructed Achievement Tests (2)." (*LSB*) XXII-2: 5-6. D51
- Ruege, Paul. "Meaningful Ranking of High School Seniors." (*TLE*) I-2: 10-11. D60
- Sitz, Herbert. "How to Prepare Pupils for the State Examinations." (*LSB*) II-2: 3-5. N31
- Sitz, Herbert. "Super-Enthusiasm." (*LSB*) III-1: 4-5. O32
- Sitz, Herbert. "Care and Use of the New Type Objective Tests." (*LSB*) VI-2: 8. D35
- Trettin, Emil. "The Testing Program in Our Schools." (*LSB*) XXIII-2: 7-8. D52
- Trettin, Emil. "Testing Program Results 1951-52." (*LSB*) XXIV-4: 10-12. My54
- Trettin, Emil. "The Testing Program Results for 1953-1954." (*LSB*) XXV-3: 6. F55
- Trettin, Emil. "Our Synod-Wide Testing Program in Our Schools." (*LSB*) XXV-4: 8. My55
- Wendler, David. "Don't Put All Your Eggs in the Standardized Testing Basket." (*TLE*) XXXIII-4: 106-112. My93
- Willems, Paul. "The Minnesota Graduation Standards." (*TLE*) XXXVII-4: 107-110 M97
- Zarling, Irene. "Goals of Achievement in the Kindergartens of Our Lutheran School." (*LSB*) XI-3: 5-6. F41

### Administration

- Ahlswede, Eugene. "Planning." (*TLE*) XXIV-3: 15. F84
- Anonymous. "Sunday School Superintendent." (*PCE*) I-3: 41. W89
- Anonymous. "Responsibilities and Activities of District BPE." (*TLE*) XI-4: 22. My71
- Anonymous. "Duties of the District Board of Education." (*LSB*) XX-3: 8. F50
- Birkholz, Gerhard. "Prepare God's People." (*PL*) I-1: 48-49. N92
- Boll, Arlyn. "Lights that Shine!" (*TLE*) XI-3: 7-8. F71
- Boll, Arlyn. "Who Is He? What Does He Want?" (*TLE*) XIII-2: 14-15. D72

- Boll, Arlyn. "Where's He Going? What's He Doing?" (*TLE*) XIII-3: 12-14. F73
- Borgwardt, Wayne. "The Dynamic Triangle of Church Leadership." (*PL*) II-3: 8,11 Su94
- Borgwardt, Wayne. "Let's Hear It For Adequate Administration." (*TLE*) XXV-3: 4-7. F85
- Brutlag, Ron. "Teaming Up." (*PL*) I-2: 7-8. Sp93
- Czer, Ramona. "Palest Ink: Record Keeping for Sunday Schools." (*PCE*) I-4: 52-53. Sp90
- Czer, Lawrence. "The Body Politic of Church Service." (*TLE*) XXXIX-3: 67 F99
- Eich, John. "Council Consistency Amid Turnover." (*PL*) IV-1: 18-20 Fa95
- Fehlauer, Adolph. "Laborers with God." (*TLE*) XVI-4: 6-7. My76
- Fehlauer, Adolph. "Our Responsibility." (*LSB*) XXX-1: 3-4. O59
- Freese, John. "The WELS Synodical Structure: Transparent Service." (*TLE*) XXXVIII-2: 53-55 D97
- Fuhrmann, C.G. "First Aid." (*LSB*) X-4: 4-5. My40
- Gentz, Grant. "Man in the Office, The." (*TLE*) XIV-2: 9-10. D73
- Gurgel, Karl. "As One Who Serves." (*PL*) I-3: 8 Su93
- Gurgel, Karl. "Leadership in the Last Days." (*PL*) II-3: 7-8 Su94
- Haag, Keith. "Brother to Brother." (*PL*) I-2: 4-6. Sp93
- Heins, Ronald. "Can the Blind Lead the Blind." (*PL*) I-3: 11 Su93
- Huebner, Lloyd. "Making an Image." (*TLE*) XII-3: 2-3. F72
- James Raabe. "Fund Management: Avoiding Criticism, Doing What is Right." (*TLE*) XXXI-4: 85-87. My91
- Keller, Kevin. "Leadership Effectiveness in the WELS Elementary Schools." (*TLE*) XXXVI-2: 52-56 D95
- Klemp, Douglas. "Relationships in the Sunday School (5): The Sunday School Superintendent." (*PL*) IV-3: 9-10 Su96
- Knippel, Darrell. "Practical Suggestions for Faculty In-Service Programs." (*TLE*) XVI-2: 8-10. D75
- Knippel, Darrell. "Practical Suggestions for Faculty In-Service Programs." (*TLE*) XVI-3: 11-13. F76
- Loftin, R.Bowen. "The Board of Education: Overseeing and Oversight." (*PCE*) I-1: 8-10. Su89
- Loftin, R.Bowen. "Congregational Administration of Educational Programs & Agencies." (*PCE*) I-2: 28-29. Fa89
- Minch, Jack. "Code Red." XLVII-3: 85-86. F07. (*TLE*).
- Moskop, A.A. "The Handbook." (*TLE*) II-1: 8-9. O61
- Moskop, A.A. "House Rules." (*TLE*) II-2: 6-7. D61
- Mueller, Wayne. "Hey, That's My Brother." (*PL*) I-3: 10 Su93
- Mueller, Wayne. "Leadership: Rod and Staff." (*PL*) II-2: 52 Sp94
- Mueller, Wayne. "The Old One-on-One." (*PL*) II-3: 9-10

- Su94
- Mueller, Wayne. "Leadership: A Place for Praise." *(PL)* IV-1: 52 Fa95
- Mueller, Wayne. "Leadership: Heads Have Ears." *(PL)* IV-2: 52 Sp96
- Mueller, Wayne. "Leadership: Power Steering." *(PL)* IV-3: 52 Su96
- Mulinix, Tom. "God's Market Plan." *(PL)* I-3: 9 Su93
- Payne, David. "Hope for the Hectic." *(PL)* I-3: 12-13 Su93
- Petermann, Kurt. "Secretarial Help: No Longer a Luxury." *(TLE)* XXIV-3: 20-21. F84
- Petermann, Kurt. "School-Hopping." *(TLE)* XXVII-1: 8-10. O86
- Plath, LeDell. "The Team Ministry Program/Teacher and Principal Assessment." *(TLE)* XXXV-3: 72-73 F95
- Plocher, John. "Introducing the Executive Secretary." *(LSB)* VII-1: 1. S36
- Pope, Reginald. "Work toward Your Objectives." *(PL)* I-2: 10-11. Sp93
- Rahn, James. "Define the Job." *(TLE)* XXXVI-4: 100-102 M96
- Riediger, Norman. "Planning Your Synod Mission Offering." *(PL)* I-2: 9. Sp93
- Roth, Ron. "The Church Needs Authoritative Leaders." *(PL)* I-1: 50-51. N92
- Schlepp, Jeff. "Leadership—A Board Member's Perspective." *(PL)* II-1: 50-51 Fa93
- Sievert, Erich. "Leadership—Some Findings of Research." *(TLE)* V-1: 8-9. O64
- Sievert, Roger. "Communications Among Our Schools." *(TLE)* XXIII-2: 16-18. D82
- Thiesfeldt, Gregory. "Improving School Climate." *(TLE)* XXVIII-3: 64-68. F88
- Thiesfeldt, Gregory. "Administrative Release Time (ART)." *(TLE)* XXXVIII-4: 121-126 My98
- Valleskey, David. "Leadership Training." *(TLE)* XI-1: 7-8. O70
- Wagenknecht, Myrl. "Aaron's Arms (1)." *(PL)* II-3: 4-5,7 Su94
- Warnke, Harold. "Improving Our Faculty Meetings." *(TLE)* III-2: 10-12. D62
- Warnke, Harold. "Let's Improve Our Teacher Meetings." *(TLE)* IV-3: 12-14. F64
- Wilkes, Michael. "Love People—Manage Activity." *(PL)* IV-1: 21-22 Fa95
- Woldt, Alfons. "Curriculum—Who's Responsible?" *(TLE)* III-4: 10-11. My63
- Zahn, Ronald. "Role of the Sunday School Superintendent, The." *(TLE)* XIX-3: 5-7. F79

## Adult

- Baer, Eugene. "Trinity's Adult Education Program." *(PL)* I-2: 17-18 Sp93
- Bauer, Gerhard. "The Gospel Goes to Prison." *(LL)*. VII-3:

- 8-10 Sp99
- Becker, Bruce. "Growing Up." *(PL)* IV-2: 4-5,7 Sp96
- Becker, Bruce. "Training Men for Ministry." *(PL)* IV-2: 8-10 Sp96
- Becker, Bruce. "Planning and Promoting the ABCs." *(PL)* IV-3: 48-50 Su96
- Behringer, James. "Christ-serving or Self-serving." *(PL)* II-2: 39 Sp94
- Braun, John. "Thrill of the Savior: An Interview with David Kehl". XIII-2 14-17 Wi05. (LL).
- Braun, John. "Hear! Hear!" *(LL)*. VII-3: 14-17 Sp99
- Cares, Mark. "Spiritual Checkups." *(PL)* II-2: 42-43 Sp94
- Cares, Mark. "Sound the Retreat for Adult Bible Class." *(TLE)* XXV-4: 18-19. My85
- Crass, Matt. "Making Bible Study a Priority." *(PL)* I-1: 10. N92
- Covach, John. "Never Retire!" *(LL)*. VII-3: 20-21 Sp99
- Eckert, Paul. "Part-Time Agency for Adults, A." *(TLE)* XI-1: 18-20. O70
- Haferman, Al. "How Can I Serve the Lord in My Aging Years?" *(PL)* II-2: 26-27 Sp94
- Hoenecke, Henry. "Have You Considered Prison Ministry." *(PL)* I-3: 43 Su93
- Horn, Fritz. "Ideal Model or Model the Ideal." *(PL)* IV-2: 6-7 Sp96
- Hunter, Randy. "Getting at the Core." *(PL)* IV-3: 46-47 Su96
- Jeske, Mark. "Some Notes on Adult Instruction and Confirmation." *(TLE)* XXIV-2: 2-5. D83
- Kelm, Daniel. "Open Bibles and Open Hearts—Close the Back Door." *(PL)* I-2: 20-21 Sp93
- Kelm, Paul. "Cure-all or Quick-fix." *(PL)* I-1: 4-5. N92
- Kelm, Paul. "What to Do?" *(LL)* XI-3: 8-10 Sp03..
- Kruck, Keith. "The Value of Bible Classes." *(TLE)* XXVI-II-4: 12-14. O87
- Kuenn, Thomas. "Holy Scripture: Don't Leave Home Without It!" *(PL)* II-3: 22 Su94
- Martens, Eugene. "Crossing Generations." *(LL)*. VII-3: 4-7 Sp99
- Olson, Lawrence. "Insights on Outreach." *(PL)* I-2: 34,36 Sp93
- Ott, Linda and Dave Ponath. "The Befriending Ministry at Christ Lutheran." *(PL)* I-1: 15-16. N92
- Ponath, Dave and Linda Ott. "The Befriending Ministry at Christ Lutheran (1)." *(PL)* I-1: 15-16. N92
- Ponath, David and Linda Ott. "The Befriending Ministry at Christ Lutheran (2)." *(PL)* I-2: 32-33 Sp93
- Rains, Tina. "Fading memory, but Not Fading Faith." *(LP)* VI-3: 15 Jan/Feb 99
- Rathke, Ronald J. "Really Getting Into the Word." *(PL)* I-1: 7-8. N92
- Riege, Irene. "Sign-Interpreted Services." *(LL)*. VII-3: 18-19 Sp99
- Schaefer, James. "Instructing the Adult." *(TLE)* XI-4: 14-16. My71
- Schmeling, Daniel. "Love is Ageless." *(TLE)* XXIV-1: 11-13.

O83

- Sitz, Ruth. "Senior Ministry." *(PL)* I-3: 41 Su93
- Sutton, Don. "More Will Come and More Will Grow." *(PL)* I-1: 6. N92
- Vaccarella, Lee. "Grow in the Grace of Giving." *(PL)* II-2: 40-41 Sp94
- Voss, Robert James. "Steps toward Adult Spiritual Growth." *(PL)* I-3: 23-24 Su93
- Voss, Verne. "Witness to Non-Christian Family Members." *(PL)* I-2: 35-36 Sp93
- Timmermann, Donald. "Discover, Develop, and Use Your Spiritual Gifts." *(PL)* I-3: 26-28 Su93
- Ziemer, Carl. "Good Trend or Bad." *(LL)* XI-3: 28-29 Sp03.

## Aides

- Berg, Linda. "Wanted: More Time." *(TLE)* XII-3: 4-5. F72
- Fairbairn, Helen. "You Can Go Home Again." *(TLE)* XXIV-4: 19-20. My84
- Isch, John. "Children Teaching Children." *(TLE)* XVII-4: 6-8. My77
- Raabe, James. "Room-Mother Program Can Work, A." *(TLE)* X-3: 8-9. F70

## Arithmetic

- Albrecht, R.M. "Book Chat." *(LSB)* I-1: 5-6. N30
- Albrecht, R.M. "Book Chat." *(LSB)* III-3: 5. F33
- Arndt, Emanuel. "What Causes the Trouble?" *(LSB)* XIII-3: 3. F43
- Averbeck, Julia. "Number Strips." *(TLE)* XXX-2: 47-48. D89
- Averbeck, Robert. "Learning Center Activities." *(TLE)* XVI-1: 7-8. O75
- Blauert, Karl. "Modern Mathematics in Our Schools." *(TLE)* VIII-1: 24. O67
- Boehlke, Paul. "Give It a Twist." *(TLE)* XXX-1: 18-19. O89
- Dallmann, J. E. "Revolutionary New Arithmetic Method." *(TLE)* III-4: 6-7. My63
- Dorn, Orlan. "Discovery—An Approach to Arithmetic." *(TLE)* IV-2: 7-8. D63
- Fehlauer, Adolph. "Multiplication and Division Combinations." *(LSB)* XI-2: 5. D40
- Gerlach, Vernon. "Evaluating the Arithmetic Program in Our Schools (1)." *(LSB)* XXI-1: 5-6. O50
- Gerlach, Vernon. "Evaluating the Arithmetic Program in Our Schools (2)." *(LSB)* XXI-2: 3-4. D50
- Gerlach, Vernon. "Evaluating the Arithmetic Program in Our Schools (3)." *(LSB)* XXI-3: 4-6. F51
- Gerlach, Vernon. "Evaluating the Arithmetic Program in Our Schools (4)." *(LSB)* XXI-4: 4-7. My51
- Goede, Mabel. "Teaching Primary Arithmetic." *(LSB)* XXVI-4: 4-7. My56
- Haar, Beverlee. "Pre-Math Experiences." *(TLE)* XXVIII-3: 69-70. F88

- Hagedorn, Grace. "Of Peter Rabbit and Teeter-Totters." *(TLE)* XXI-3: 13-14. F81
- Hemling, Timothy. "A Study of Saxon Math." *(TLE)*. XLI-3: 86-90 F01
- Jeseritz, Rudolph. "Track Meet that's Different, A." *(TLE)* XIX-3: 23-24. F79
- Kriewall, Thomas. "The Sum and Substance of Arithmetic." *(TLE)* I-3: 6-8. F61
- Leverence, Kenneth. "Introducing Modern Mathematics Into Our Schools." *(TLE)* III-4: 12-14. My63
- Maurice, Brian. "Saxon Math: Fire and Ice". XLV-4: 123-125. M05. (TLE).
- NCTM. "Calculators and the Education of Youth." *(TLE)* XXXV-3: 93-94 F95
- Paulsen, John. "Resources for Teaching Mathematics." *(TLE)* XIII-4: 12-13. My73
- Paulsen, John. "Metric System is Coming, The." *(TLE)* XVI-3: 14-16. F76
- Pelzl, David. "Mathematics Education: Past, Present, and Future (Part One)." *(TLE)* XXIX-2: 39-41. D88
- Pelzl, David. "Mathematics Education: Past, Present, and Future (Part Two)." *(TLE)* XXIX-3: 58-60. F89
- Pelzl, David. "Mathematics Education: Past, Present, and Future (Part Three)." *(TLE)* XXIX-4: 76-78. My89
- Pelzl, David. "Book Reviews." *(TLE)* XXVIII-2: 47-48. D87
- Pelzl, David. "Book Reviews." *(TLE)* XXVIII-3: 58-59. F88
- Pelzl, David. "Calculators for the 1990s." *(TLE)* XXXI-2: 47-48. D90
- Pelzl, David. "Authentic Assessment: Mathematics." *(TLE)* XXXIV-3: 86-89. F94
- Pelzl, David. "Stop Borrowing." *(TLE)* XXXIV-3: 93. F94
- Schlueter, Viola. "How I Did It (2)." *(LSB)* XXI-3: 2-4. F51
- Schulz, Arthur. "Experimental Programs and the Curriculum." *(TLE)* IV-1: 8-9. O63
- Schulz, Arthur. "Book Review." *(LSB)* XXVI-1: 7-8. O55
- Sievert, Alma. "A Lesson in Numbers for the Second Grade." *(LSB)* IX-1: 4-5. S38
- Sitz, Herbert. "Book Chat." *(LSB)* II-4: 5. Mr32
- Sitz, Herbert. "Book Chat." *(LSB)* III-3: 5. F33
- Yotter, Harold. "Mathematics Balance: A Useful Manipulative, The." *(TLE)* XVII-1: 23-24. O76
- Zanto, Stephen. "Calculators in the Classroom." *(TLE)* XXVIII-2: 43-46. D87

## Art

- Averbeck, Robert. "Crayon Techniques." *(TLE)* IV-1: 6-7. O63
- Averbeck, Robert. "Helping Children Appreciate Art." *(TLE)* VI-3: 6-7. F66
- Averbeck, Robert. "Posters That Communicate." *(TLE)* X-2: 6-7. D69
- Averbeck, Robert. "Nature Crafts." *(TLE)* XI-2: 6-7. D70
- Averbeck, Robert. "Observing 125 Years of Grace in Our Schools." *(TLE)* XV-1: 7-9. O74

- Averbeck, Robert. "Three-Dimensional Art." (*TLE*) XV-2: 11-12. D74
- Averbeck, Robert. "Folk Art of America." (*TLE*) XVI-3: 9-10. F76
- Averbeck, Robert. "Corner for Art, A." (*TLE*) XVII-1: 9-10. O76
- Averbeck, Robert. "Family Art Projects." (*TLE*) XVII-4: 9-10. My77
- Averbeck, Robert. "Printmaking in All the Grades." (*TLE*) XVIII-1: 10-11. O77
- Averbeck, Robert. "Development of Visual Symbolization, The." (*TLE*) XVIII-2: 13-14. D77
- Averbeck, Robert. "Book Reviews." (*TLE*) XXIV-1: 7-8. O83
- Averbeck, Robert. "Are We Having Art This Week?" (*TLE*) XXVII-1: 18-20. O86
- Averbeck, Robert. "DBAE—What is It?" (*TLE*) XXVII-2: 10-13. D86
- Averbeck, Robert. "Developing a DBAE Curriculum." (*TLE*) XXVII-3: 3-8. F87
- Averbeck, Robert. "Resources for Teaching Art." (*TLE*) XXVIII-4: 6-9. O87
- Burmeister, Paul. "As Easy as Pie." (*LP*) V-1:5 Sep/Oct 1997
- Burmeister, Paul. "Pictures that Pay Premiums." (*TLE*). XL-1: 14-17 O99
- Burmeister, Paul. "Dear Anna: Letters to a Young Artist." (*LP*) XI-6: 28-29 July/Aug04.
- Czer, Ramona. "Letters From Home: Fair Art." (*TLE*) XXXIII-4: 126-127. My93
- Drews, Evelyn. "What Can I Do For Art Friday?" (*TLE*) XIV-1: 5-6. O73
- Drews, Evelyn. "Art For Christmas and Those Long Winter Months." (*TLE*) XIV-2: 11-13. D73
- Drews, Evelyn. "Tissue Art Ideas—Plus a Few Others." (*TLE*) XIV-3: 7-9. F74
- Drews, Evelyn. "One Last Art Article For the School Year." (*TLE*) XIV-4: 8-10. My74
- Found, Lester. "In Favor of Art for High School Curricula." (*TLE*) XVIII-2: 8-10. D77
- Jasperson, Jason. "Fine Arts in Lutheran Education." (*TLE*) XLIII-2: 50-56 D02.
- Kehl, Eulora. "Christmas Gifts for Mothers." (*TLE*) I-2: 4-5. D60
- Manthey, Muriel. "Art Appreciation." (*TLE*) XIII-3: 4-5. F73
- Moldenhauer, Robert. "As I See It." (*LSB*) XXIII-3: 3-6. F53
- Moldenhauer, Robert. "Ideas for Art." (*LSB*) XXIX-1: 8. O58
- Moldenhauer, Robert. "Art Ideas." (*LSB*) XXIX-2: 8. D58
- Moldenhauer, Robert. "Art Ideas." (*LSB*) XXIX-4: 9-10. My59
- Moldenhauer, Robert. "Ideas for Art." (*LSB*) XXVIII-3: 7-8. F58
- Nelson, Jan. "Making Every Piece Fit." (*LP*) IX-1: 6-8 Sep/Oct 01
- Pelzl, Theo. "Lost: A Picture." (*LSB*) VI-3: 4. F36
- Petermann, Kurt. "Reformation Projects." (*TLE*) XXIII-2: 2-4. D82
- Quandt, Lillian. "Let's Make Christmas Gifts." (*TLE*) X-2: 4-5. D69
- Quandt, Lillian + Schmidt. "Useful Art Projects." (*TLE*) V-2: 6-7. D64
- Ring, Lester. "Graphic Arts at Our School." (*TLE*) III-1: 10-12. O62
- Schmidt, Gertrude + Quandt. "Useful Art Projects." (*TLE*) V-2: 6-7. D64
- Schoeneck, Marcella. "Art in the Primary Picture." (*TLE*) X-4: 4-5. My70
- Sievert, Erich. "Correlating Art With the Church Year." (*LSB*) XIX-4: 1-2. My49
- Stindt, A.C. "A Curriculum Study in Art (part 1)." (*LSB*) XI-3: 3-5. F41
- Stindt, A.C. "A Curriculum Study in Art (part 2)." (*LSB*) XI-4: 3-6. My41
- Tacke, Rachel. "Art as I See It." (*TLE*) XXXVII-4: 111-113 M97
- Tacke, Rachel. "Papermaking: A Little Mess to Enhance Your Creative Classroom." (*TLE*) XXXVIII-1: 27-32 O97
- Tacke, Rachel. "Consider the Value of Coloring." (*TLE*), XXXVIII-2: 59-60 D97
- Tacke, Rachel. "Adventures in Art: A New Spin on the Color Wheel." (*TLE*). XL-1: 4-6 O99
- Westendorf, Rolfe. "Ars Pro Artis?" (*TLE*) XXV-3: 15. F85

## Assessment

- Bauer, Jackie. "Report Cards: A "Teachable Moment"." (*LP*) III-3: 7. Jan/Feb 96
- Hawkes, Elizabeth. "A Young Child's Portfolio." (*TLE*) XXXVIII-1: 4-6 O97
- Isch, John. "Developmentally Appropriate Early Childhood Education: Rating." (*TLE*) XXXV-2: 61-62 D94
- Juern, John. "The Second Time Around." (*LP*) IX-4: 7 Ma/Ap 02
- Loomis, Cheryl. "Assessment and Accountability." (*TLE*) XLIII-3: 99 My03.
- Melendy, Carla. "Classroom Assessments." (*TLE*) XLIII-3: 102-109 My03.
- Menk, Roland. "Authentic Assessment in the Language Arts." (*TLE*) XXXV-2: 36-39 D94
- Plath, LeDell. "Teacher and Principal Assessment." (*PL*) III-1: 22-23 Fa94
- Wormer, Debra + Busack. "A Look Inward: School Self-study." (*PL*) III-2: 29-30 Sp95

## Assignments

- Anonymous. "A Symposium." (*LSB*) VI-3: 5-7. F36
- Elve, Philip. "Homework: A Solvable Problem?" (*TLE*) VII-

3: 21-22. F67

Hoffmann, M.F. "Busy Work." (*LSB*) X-4: 5. My40  
Keup, Louis. "The Merits and Demerits of Homework."  
(*LSB*) XIV-3: 3-4. F44

Juern, John. "Homework Headaches." (*LP*) X-1: 23  
Sep/Oct 02

Sitz, Herbert. "No Homework Today!." (*TLE*) XIV-3: 23.  
F74

Stindt, A.C. "Busy Work in Our Schools (1)." (*LSB*) II-2: 6.  
N31

Stindt, A.C. "Busy Work in Our Schools (2)." (*LSB*) II-3: 2-  
3. J32

Stindt, A.C. "Practical Suggestions for Busy Work (3)."  
(*LSB*) II-4: 2-4. Mr32

Wessel, Howard. "Purposeful Reading in Social Studies."  
(*TLE*) XII-3: 8-10. F72

## Athletics

Baldauf, Sharon. "Sports: A Learning Experience for  
Children." (*TLE*) XXIX-2: 42-46. D88

Czer, Ramona. "B-Ball: Some Post-season Musings." (*TLE*)  
XXXVI-4: 116-118 M96

Charron, Craig. "The Sportsmanship Game." (*LP*) XI-3: 24  
Jan/Feb04.

Dommer, M.L. "Calisthenics." (*LSB*) XIII-1: 4-5. S42

Gronholz, John. "Exploration of a Curricular Frontier."  
(*TLE*) XV-3: 19-21. F75

Helwig, Donald. "Why Do We Have...?" (*TLE*) XIX-2: 8-  
10. D78

Kaniess, Gerhard. "A Look at Luther High School  
Athletics." (*TLE*) II-1: 10-11. O61

Lequia, Joseph. "Winning or Participating (1)." (*TLE*) XXI-  
3: 8-10. F81

Lequia, Joseph. "Winning or Participating (2)." (*TLE*) XXI-  
4: 8-9. My81

Pape, W.A. "The Playground." (*LSB*) X-1: 2. S39

Schumann, Dolores. "Rhythmic Activities in the Primary  
Grades." (*TLE*) I-1: 4-5. O60

Sitz, Carleton. "Conditioning Young Bodies for Sports and  
for Life." (*TLE*) XVII-3: 16-18. F77

Stetzenbach, Terry. "Take me out to the Ball Game." (*LP*).  
VI-6: 10-11 Ju/Au99

Thompson, Lloyd. "Playground Objectives." (*TLE*) II-3: 6-  
7. F62

Weishahn, Milton. "Physical Education Program, A." (*TLE*)  
III-2: 2-3. D62

## Attendance

Jeske, Mark. "Why Johnny Doesn't Go to Church." (*TLE*)  
XXIII-1: 12-15. O82

Mattek, John. "Children's Church Attendance." (*TLE*) II-3:  
8-9. F62

Petermann, Kurt. "Absenteeism Syndrome, The." (*TLE*)

XXI-2: 8-9. D80

Valleskey, David. "Christian Day School and Sunday  
School." (*TLE*) XIV-3: 5-6. F74

## Audiovisual

Ahlswede, Eugene. "Garbage In - Garbage Out." (*TLE*)  
XXVI-3: 14-15. F86

Anonymous. "Off-Air Taping Guidelines." (*TLE*) XXVIII-  
3: 71-72. F88

Barber, John. "We Put Up a Poster but Nobody Came!."  
(*PL*) I-1: 32-33. N92

Barber, John. "Spreading the Good News: Insights and Tips  
on Parish Media U." (*PL*) I-2: 45-47 Sp93

Barber, John. "Planning a VBS Promotion." (*PL*) II-2: 28-29  
Sp94

Barnes, Glenn. "Use of Visual Aids with Rear Projection."  
(*TLE*) IV-1: 10-11. O63

Bierwagen, Bertha. "Think Overhead First." (*TLE*) X-1: 10-  
11. O69

Bode, Glenn + Kirk. "High School TV Production: A  
Conversation." (*TLE*) XVII-1: 16-19. O76

Born, Silas. "Preparing Tapes for the Instructional Center."  
(*TLE*) XI-2: 19-20. D70

Brodbeck, Michael. "Instructional Media-Listening Centers."  
(*TLE*) XIX-4: 12-13. My79

Bunnow, David. "Television, Video, and the Local  
Congregation." (*TLE*) XXIV-3: 10-11. F84

Dommer, M.L. "A Presentation Showing How the Greatest  
.... Visual Education." (*LSB*) VII-2: 3-5. D36

Dommer, M.L. "A Presentation Showing .... Visual  
Education (cont.)." (*LSB*) VII-3: 2-4. F37

Falck, Karla. "Curiosity Centers." (*TLE*) XIII-2: 7-8. D72

Fischer, Gilbert. "DMLC Moves Into Media." (*TLE*) XIV-3:  
18-19. F74

Hagedorn, Grace. "Cast Thy Bread upon the Waters."  
(*TLE*) XXI-2: 10-11. D80

Hamisch, Marguerite. "Aim and Values of an Object  
Lesson." (*LSB*) XVII-3: 5-6. F47

Henrickson, James. "Integrating Technological Tools into  
Today's Classrooms." (*TLE*) XXXVI-1: 11-29 O95

Jacobson, Gerald. "Choosing Instructional Materials."  
(*TLE*) XIII-1: 8-10. O72

Johannsen, Hans. "35mm Slides in the Classroom." (*TLE*)  
III-1: 6-7. O62

Kirk, Daniel + Bode. "High School TV Production: A  
Conversation." (*TLE*) XVII-1: 16-19. O76

Kovaciny, Roger. "Start a Tape Ministry for \$150." (*TLE*)  
XXII-2: 7-10. D81

Kujath, Mentor. "What's New in Audio-Visual?" (*TLE*) I-2:  
13-14. D60

Kujath, Mentor. "Audio-Visuals for Part-Time Agencies."  
(*TLE*) XIII-2: 22-24. D72

Lanphear, Joan. "Making More Use of the Overhead  
Projector." (*TLE*) XVII-3: 10-11. F77

Oswald, Kurt. "Are We Supervising Our Children's Radio Listening Programs?" (*LSB*) XIII-4: 3-4. My43  
 Pelzl, Theo. "Una Slim." (*LSB*) XIX-3: 4-5. F49  
 Rolloff, E. O. "Effective Use of the Basic Teaching Film, The." (*TLE*) I-4: 10-11. D61  
 Scherzer, Robert. "TV or Not TV, That is the ?" (*TLE*) II-1: 6-7. O61  
 Schroeder, Marlyn. "Use of Visual Aids, The." (*TLE*) III-1: 13-15. O62  
 Sievert, Adelia. "Picture Study for Third Grade." (*LSB*) X-3: 5-6. F40  
 Sonnenburg, Richard. "Video Recorder in My Classroom?" (*TLE*) XXI-4: 12-13. My81  
 Van Laar, Myrtle. "Picture File, The." (*TLE*) X-1: 12-13. O69  
 Wulff, Frederick. "Movies as History." (*TLE*) XXXVIII-4: 113-117 My98

## Band

Hagedorn, Mrs. Fred W. "Rhythm Bands can be Fun." (*TLE*) VI-2: 6-7. D65  
 Kassulke, Paul. "Why Has Music Lost Its Forte?" (*TLE*) XXI-2: 15-17. D80  
 Meyer, Edward. "Opinions: The Christian Day School Band Program." (*TLE*) XVIII-4: 15-18. My78  
 Pape, Ronald. "Licorice Stick, The." (*TLE*) XI-3: 13-14. F71  
 Raabe, Lester. "Our Band Program." (*TLE*) XIV-3: 22. F74  
 Ahlswede, Eugene. "Let's Not Be Impatient." (*TLE*) XXV-4: 10-12. My85  
 Becker, Siegbert. "TEV—Shall We?" (*TLE*) XIII-3: 2-3. F73  
 Braun, Mark. "Stated Aim: To Worship What we Know, A." (*TLE*) XXI-2: 5-7. D80  
 Gerlach, Joel. "It's Only a Matter of Interpretation?" (*TLE*) XV-1: 5-7. O74  
 Hochmuth, Robert. "Other End of the Open End, The." (*TLE*) XVIII-3: 2-4. F78  
 Huebner, Lloyd. "Bible—What a Wonderful Book, The." (*TLE*) VII-4: 4-8. My67  
 Petermann, Kurt. "Bible—A Language Arts Tool, The." (*TLE*) XXI-4: 10-11. My81  
 Raddatz, Darwin. "The Minor Prophets Cry to the Christian Teacher Today." (*TLE*) XXVIII-2: 27-30. D87  
 Schuetze, Armin. "Use of Modern Bible Translations in Our Classrooms." (*TLE*) XIII-4: 4-7. My73  
 Warnke, Harold. "Let's Study Romans." (*TLE*) VI-2: 12-14. D65  
 Wendland, Paul. "If the Bible is Clear, How Come So Many Don't Get It?" (*TLE*) XXXVI-4: 119-121 M96

## Bible History

Albrecht, R.M. "The Birth of Moses in a Time of Distress." (*LSB*) VII-2: 5-6. D36  
 Albrecht, R.M. "Moses Called to Lead Israel." (*LSB*) VII-3:

5-6. F37  
 Albrecht, R.M. "The Plagues." (*LSB*) VII-4: 4-5. My37  
 Anonymous. "Have You Heard the Good News?" (*LSB*) XXVI-2: 5-6. D55  
 Hoepner, Walter. "A Teacher's Preparation for the Bible History Lesson." (*LSB*) XI-4: 2-3. My41  
 Isch, John. "Some Things Don't Change." (*TLE*). XLI-3: 84-85 F01  
 Kremer, Kenneth. "Teaching Bible Truth to a Digital General". XLIV-2: 38-51. D03. (TLE).  
 Lemke, Carol. "The Cardboard Storm." (*LP*). VIII-6: 12 July/Aug01  
 Paustian, Mark. "Bible Story Evangelism." (*LL*) VI-6:22-23 Su98  
 Rendahl, F. J. "Of Mustard Seeds and Lost Sheet." (*LP*). VIII-6: 14 July/Aug01  
 Steinbach, Paul. "Using Various Study Guides to Teach Bible History." (*TLE*) XXVIII-4: 82-85. My88  
 Trettin, Emil. "Bible History for Christian Day Schools." (*LSB*) XXV-2: 7. D54  
 Trettin, Emil. "Book Review." (*LSB*) XXVII-2: 5,7. D56  
 Trettin, Emil. "Teacher's Manual for 'Bible Stories'." (*LSB*) XXVIII-4: 3-5. My58

## Bible Study

Aderman, James. "Bible Study: Planning Ahead." (*PCE*) II-1: 4-5. Su90  
 Ahlswede, Eugene. "How About a Family Bible School." (*TLE*) XXIII-2: 11-13. D82  
 Baer, Eugene. "Trinity's Adult Education Program." (*PL*) I-2: 17-18 Sp93  
 Becker, Bruce. "All Those in Favor of God's Word, ...." (*PL*) IV-1: 9-11 Fa95  
 Becker, Bruce. "Training Men for Ministry." (*PL*) IV-2: 8-10 Sp96  
 Becker, Bruce. "Does Change Mean Decay?" (*LL*) VI-6:20-21 Wi98  
 Becker, Bruce. "Planning and Promoting the ABCs." (*PL*) IV-3: 48-50 Su96  
 Beckmann, Laurel. "Some Ideas for Your Devotions." (*TLE*) XXVI-4: 12-14. My86  
 Birkholz, Mark. "Young and Old." (*LL*). VIII-3: 26-27 Sp00  
 Bitter, Mark. "Awesome and Worthy." (*LP*). VIII-4: 14-15 Mar/Apr01  
 Borchardt, Paul. "Church Camping." (*TLE*) III-4: 15-17. My63  
 Braun, John. "Model, Teach, and Pray." (*LL*) VI-2:14-17 Wi98  
 Braun, John. "Survivor--First-grade style." (*LP*). VIII-6: 10-11 July/Aug01  
 Braun, Mark. "Bible Cells?" (*TLE*) XX-3: 5-8. F80  
 Cares, Mark. "Sound the Retreat for Adult Bible Class." (*TLE*) XXV-4: 18-19. My85  
 Crass, Matt. "Making Bible Study a Priority." (*PL*) I-1: 10.

- N92
- Clark, David. "Super Saturday." (*LL*). VII-4: 26-27 Su99
- Eckert, Paul. "Part-Time Agency for Adults, A." (*TLE*) XI-1: 18-20. O70
- Ehlke, Lorna. "Spoonfuls of Scripture." (*TLE*) XXI-1: 8-9. O80
- Eickmann, Paul. "Get to Grips With the Actual Stuff." (*TLE*) XII-2: 2-3. D71
- Esmeier, James. "Mephibosheth Who?" (*LL*). VII-3: 22-23 Sp99
- Fischer, William. "Personal Bible Study: An Interview With Richard Grunze." (*PCE*) III-1: 12-13. Su91
- Fischer, William. "Effective Use of Our Part-Time Educational Agencies." (*TLE*) X-1: 14-16. O69
- Frey, Conrad. "Philemon-A Conundrum?" (*TLE*) XXXIX-2: 56-58 D98
- Frey, Conrad. "The Book of the Prophet Malachi." (*TLE*) XXXIX-1: 20-22 O98
- Franzmann, Thomas. "They Serve Behind the Scenes—Sunday School Teachers." (*TLE*) XXVI-4: 19-20. My86
- Grunze, Richard. "Israelites Delight in God's Word." (*TLE*) XXXII-1: 10-14. O91
- Gurgel, Barb. "A Time for Everything" (*PL*) I-1: 21-22. N92
- Gurgel, Karl. "As One Who Serves." (*PL*) I-3: 8 Su93
- Gurgel, Karl. "Bible Class." (*TLE*) II-2: 11-13. D61
- Hansen, Neil. "Alone with the One You Love." (*PL*) I-3: 25 Su93
- Henning, Richard. "Sure We Have a Bible Class." (*TLE*) XIX-2: 5-7. D78
- Hintz, Michael. "Putting the Four P's of Bible Class Into Practice." (*PCE*) I-4: 62. Sp90
- Huebner, James. "The 4 P's of Bible Class." (*PCE*) I-1: 14-15. Su89
- Hunter, Randy. "Getting at the Core." (*PL*) IV-3: 46-47 Su96
- Jabs, Emma. "Principal Blessings." (*PL*) IV-3: 44-45 Su96
- Kehl, David. "Get Out of the Classroom! ". XIII-2 26-27 Wi05. (*LL*).
- Kelm, Paul. "Don't Babysit Your Youth Group." (*TLE*) XVI-4: 14-16. My76
- Kom, Reinhart. "Direct Bible Study in the Sunday School." (*TLE*) XX-2: 7-8. D79
- Kratz, Emily. "A Faithful Soldier." (*LP*) X-3: 26-27 Ja/Fe 03.
- Kratz, Emily. "Where is Jesus." (*LP*) X-4: 26-27 Ma/Ap 03.
- Krieger, Freddy. "Our Personal Bible Seminar." (*PL*) I-3: 22 Su93
- Kruck, Keith. "Planning a Year of Bible Classes." (*PCE*) II-4: 56-57. Sp91
- Kruck, Keith. "The Value of Bible Classes." (*TLE*) XXVI-II-4: 12-14. O87
- Kuenn, Thomas. "Holy Scripture: Don't Leave Home Without It!" (*PL*) II-3: 22 Su94
- Kuske, David. "A Bible Study on New Worship Forms." (*PL*) I-3: 15-16 Su93
- LaGrow, George. "Managing a Teen Bible Class." (*PL*) II-3: 42-44 Su94
- Leyrer, Phil. "Where Training Begins." (*LL*) VII-2: 8-10 Wi99
- Loftin, R.Bowin. "A Different Bible Class." (*PCE*) II-2: 20-21. Fa90
- Mueller, Wayne. "The Fruits are Visible." (*PL*) II-1: 21-22 Fa93
- Plath, LeDell. "Involve Them All." (*PL*) IV-2: 22-23 Sp96
- Raddatz, Darwin. "Evangelism Library from San Jose: An Integrated Program on." (*TLE*) XXIV-3: 12-14. F84
- Rathke, Ronald J. "Really Getting Into the Word." (*PL*) I-1: 7-8. N92
- Rutschow, David. "The Pastor's Role in Congregation Bible Study." (*PCE*) II-4: 60-61. Sp91
- Saar, Ernest W. A. "Effective Youth Ministry, An." (*TLE*) XVIII-3: 5-7. F78
- Schaller, Adalbert. "Beneficial Methods of Private Bible Study." (*LSB*) IX-2: 1-3. D38
- Scherbarth, David. "Wrestling with the Ephesian Problem." (*PL*) III-3: 10-11 Su95
- Schultz, Dennis. "Take Seven!" (*TLE*) XXVI-3: 12-14. F86
- Sievert, Walter. "Bible Reading in Our Schools." (*TLE*) V-3: 6-7. F65
- Spriggs, Martin. "Home Bible Study Groups." (*PCE*) II-1: 6-7. Su90
- Steinbach, Paul. "Using Various Study Guides to Teach Bible History." (*TLE*) XXVIII-4: 82-85. My88
- Stelter, Edward. "Leading the Children into the Bible through the Morning Devotion." (*TLE*) XVIII-3: 10-11. F78
- Sutton, Don. "More Will Come and More Will Grow." (*PL*) I-1: 6. N92
- Warnke, Harold. "Let's Study Romans." (*TLE*) VI-2: 12-14. D65
- Wegner, Walter. "Vasteras for Variety." (*TLE*) I-1: 12-13. O60
- Zarling, Mark. "Elisha Sandals." (*LL*) XI-4: 18-19 Su03.
- Zimmerman, Jane. "A Special Kind of Class." (*PL*) I-1: 45-46. N92
- Zink, Robert. "Bible Class—The Best Way to Serve the Young People of Our C." (*TLE*) XII-2: 17-19. D71

## Book Review

- Aderman, James. "Shout for Joy and Sing." (*TLE*) XXI-1: 24. O80
- Albrecht, R.M. "Book Chat." (*LSB*) I-1: 5-6. N30
- Albrecht, R.M. "Book Chat." (*LSB*) I-3: 4-5. n.d.31
- Albrecht, R.M. "Book Chat." (*LSB*) III-3: 5. F33
- Albrecht, R.M. "Book Chat." (*LSB*) III-3: 6. F33
- Anonymous. "Book Chat." (*LSB*) II-3: 5. J32
- Anonymous. "Books." (*TLE*) XXI-4: 21-22. My81
- Anonymous. "Luther Books for Elementary School Libraries." (*TLE*) XXIII-3: 20-22. F83

- Anonymous. "Luther Books: A Passel of Informal Reviews." (*TLE*) XXIII-4: 3-5. My83
- Arndt, Emanuel. "What is New in Professional Books?" (*LSB*) XIX-3: 5. F49
- Arndt, Emanuel. "What is New in Professional Books?" (*LSB*) XX-2: 2-3. D49
- Arndt, Emanuel. "What is New in Professional Books?" (*LSB*) XX-3: 2. F50
- Arndt, Emanuel. "What is New in Professional Books?" (*LSB*) XX-4: 3-4. My50
- Arndt, Emanuel. "What is New in Professional Books?" (*LSB*) XXI-2: 2-3. D50
- Arndt, Emanuel. "What is New in Professional Books?" (*LSB*) XXII-2: 5-6. D51
- Arndt, Emanuel. "Book Review." (*LSB*) XXIX-1: 7-8. O58
- Arndt, Emanuel. "Book Review: The Christian Kindergarten." (*LSB*) XXV-4: 11-12. My55
- Arndt, Emanuel. "Book Review." (*LSB*) XXVIII-1: 5-6. O57
- Arndt, Emanuel. "Book Review." (*LSB*) XXVIII-2: 5-6. D57
- Arndt, Emanuel. "Book Review." (*LSB*) XXX-4: 5. My60
- Averbeck, Julia. "Books." (*TLE*) XXIV-2: 5-6. D83
- Averbeck, Robert. "Book Reviews." (*TLE*) XXIV-1: 7-8. O83
- Boehlke, Paul. "Book Review." (*TLE*) XXV-4: 3. My85
- Boehlke, Paul. "Book Review." (*TLE*) XXVI-2: 14. D85
- Cares, Mark. "Speaking the Truth in Love to Mormons." (*PL*) III-3: 22-23 Su95
- Daley, Evelyn. "Junglewalk (Nancy Tafuri)." (*TLE*) XXX-1: 21. O89
- Degner, Steven. "We Believe—Therefore We Speak." (*PL*) III-3: 19,21 Su95
- Gerlach, Vernon. "What is New in Professional Books." (*LSB*) XXII-1: 5. O51
- Gerlach, Vernon. "New Books for Younger Children." (*LSB*) XXII-3: 3-4. F52
- Gerlach, Vernon. "New Books for Younger Children." (*LSB*) XXIII-1: 5-6. O52
- Gerlach, Vernon. "New Books for Younger Children." (*LSB*) XXIV-2: 4-6. D53
- Gurgel, Ann. "Hatchet (Gary Paulsen)." (*TLE*) XXIX-1: 24. O88
- Gurgel, Ann. "The Facts & Fictions of Minna Pratt (Patricia MacLachlan)." (*TLE*) XXX-1: 20. O89
- Hagedorn, Grace. "Hurray For Rey!" (*TLE*) XXII-3: 16. F82
- Hasley, Karen. "Hobbits and Other Living Creatures." (*TLE*) XVI-4: 10-11. My76
- Heckmann, George. "An Evaluation of Science Texts (Grades 7 and 8)." (*LSB*) XXI-2: 5-6. D50
- Hoewisch, Allison. "Linnea in Monet's Garden (Christina Bjork)." (*TLE*) XXX-3: 72. F90
- Isch, John. "Book Report." (*TLE*) XXVII-1: 21-22. O86
- Isch, John et al. "Book Reviews." (*TLE*) XXII-1: 18-21. O81
- Jacobson, Gerald. "Children's Religious Books: Join the Rat Race." (*TLE*) XV-4: 20-21. My75
- Jacobson, Gerald. "Keeping Up With C.S. Lewis." (*TLE*) XVI-1: 21-22. O75
- Jacobson, Gerald. "More Keeping Up With C.S. Lewis." (*TLE*) XVI-2: 19. D75
- Jacobson, Gerald. "Children's Book Showcase." (*TLE*) XVII-4: 20-22. My77
- Jacobson, Gerald. "The Best of Book Bonanza." (*TLE*) XX-3: 23. F80
- Jacobson, Gerald. "The American Revolutionaries (Milton Meltzer)." (*TLE*) XXIX-3: 72. F89
- Jacobson, Gerald + Maass. "Children's Book Showcase." (*TLE*) XVII-4: 20-22. My77
- Juern, John et al. "Book Reviews." (*TLE*) XXV-1: 7-8. O84
- Kirschke, William. "Book Review: Reading Readiness, Harrison." (*LSB*) XVIII-1: 6-7. O47
- Klatt, H.R. "Book Chat." (*LSB*) II-3: 5. J32
- Klatt, H.R. "Book Chat." (*LSB*) III-1: 6. O32
- Klatt, H.R. "What is New in Professional Books." (*LSB*) XIX-2: 2-3. D48
- Klatt, H.R. "What's New in Professional Books." (*LSB*) XXI-3: 7-8. F51
- Levorson, Leroy et al. "The Lutheran Church in North American Life." (*TLE*) XX-4: 21. My80
- Maass, Julie + Jacobson. "Children's Book Showcase." (*TLE*) XVII-4: 20-22. My77
- McFarland, A. Elizabeth. "What is New in Professional Books." (*LSB*) XXII-3: 3. F52
- Meyer, Edward. "Music in Early Childhood." (*TLE*) XXVII-1: 14-17. O86
- Neujahr, Charlene. "Special Education Book Reviews." (*TLE*) XXIV-4: 15-16. My84
- Neuman, Kevin. "Evangelism is for Children Too." (*PL*) III-3: 19,21 Su95
- Pelzl, David. "Book Reviews." (*TLE*) XXVIII-2: 47-48. D87
- Pelzl, David. "Book Reviews." (*TLE*) XXVIII-3: 58-59. F88
- Pelzl, Theo. "Book Chat." (*LSB*) IV-1: 5-6. O33
- Schroeder, Morton. "What is New in Professional Books." (*LSB*) XIX-4: 2. My49
- Schroeder, Morton. "New Ulm in Retrospect." (*LSB*) XX-4: 6-7. My50
- Schroeder, Morton. "Landmark Books: A Significant Contribution to Child Lit (1)." (*LSB*) XXI-4: 8-10. My51
- Schroeder, Morton. "The 'Land of the Free' Series." (*LSB*) XXII-2: 8-10. D51
- Schroeder, Morton. "Landmark Books: A Significant Contribution to Child Lit (2)." (*LSB*) XXII-4: 9-10. My52
- Schroeder, Morton. "Historical Fiction Stimulant Par Excellence." (*LSB*) XXIII-4: 11-15. My53
- Schroeder, Morton. "Of Whom the World Says Much." (*LSB*) XXIV-4: 7-9. My54
- Schroeder, Morton. "Current Trends in Children's Literature." (*LSB*) XXVIII-2: 1-5. D57

Schroeder, Morton. "Book Reviews." (*TLE*) XXVIII-4: 4-6. O87

Schulz, Arthur. "What is New in Professional Books." (*LSB*) XXIII-1: 4. O52

Schulz, Arthur. "What is New in Professional Books." (*LSB*) XXIII-2: 3. D52

Schulz, Arthur. "Book Review." (*LSB*) XXVI-1: 7-8. O55

Sievert, Erich. "What is New in Professional Books." (*LSB*) XX-1: 2. O49

Sievert, Erich. "What is New in Professional Books." (*LSB*) XXI-4: 2-4. My51

Sievert, Erich. "The Good English Series." (*LSB*) XXIII-2: 4. D52

Sims, Melinda. "New Plans for Wellspring." (*PL*) III-3: 33-34 Su95

Sitz, Herbert. "Book Chat." (*LSB*) I-1: 4-5. N30

Sitz, Herbert. "Book Chat." (*LSB*) I-2: 4-5. n.d.30

Sitz, Herbert. "Book Chat." (*LSB*) I-3: 5. n.d.31

Sitz, Herbert. "Book Reviews." (*LSB*) II-1: 5-6. S31

Sitz, Herbert. "Book Reviews." (*LSB*) II-1: 5. S31

Sitz, Herbert. "Book Reviews." (*LSB*) II-2: 5. N31

Sitz, Herbert. "Book Chat." (*LSB*) II-3: 5. J32

Sitz, Herbert. "Book Chat." (*LSB*) II-4: 5. Mr32

Sitz, Herbert. "Book Chat." (*LSB*) III-1: 6. O32

Sitz, Herbert. "Book Chat." (*LSB*) III-2: 6. N32

Sitz, Herbert. "Book Chat." (*LSB*) III-3: 5. F33

Sitz, Herbert. "Book Chat." (*LSB*) III-3: 6. F33

Sitz, Herbert. "Book Chat." (*LSB*) IV-3: 3-4. Ap34

Sitz, Herbert. "Book Reviews by Children." (*TLE*) XI-3: 18-19. F71

Sitz, Herbert. "From a Schoolroom Window." (*LSB*) XIV-2: 5-6. D43

Sitz, Herbert. "From a Schoolroom Window." (*LSB*) XV-2: 5-6. D44

Sitz, Herbert. "From a Schoolroom Window." (*LSB*) XV-3: 5. F45

Sitz, Herbert. "From a Schoolroom Window." (*LSB*) XV-4: 5-6. My45

Stindt, A.C. "Book Chat." (*LSB*) I-2: 4. n.d.30

Stindt, A.C. "Book Reviews." (*LSB*) II-1: 5. S31

Stindt, A.C. "Book Reviews." (*LSB*) II-2: 5. N31

Stindt, A.C. "Book Chat." (*LSB*) II-4: 5. Mr32

Stindt, A.C. "Book Chat." (*LSB*) III-2: 6. N32

Trettin, Emil. "Book Review." (*LSB*) XXVII-2: 5,7. D56

Trettin, Emil. "The Junior Northwestern." (*LSB*) XXVIII-1: 7. O57

Wandersee, James et al. "Book Review." (*TLE*) XXVI-4: 10-11. My86

Wierschke, Carol. "Books — Books — Books." (*TLE*) XIV-4: 13-14. My74

Wierschke, Carol. "Look for a Book?" (*TLE*) XV-3: 11-12. F75

Wilde, Annette. "Old Henry (Joan Bloss)." (*TLE*) XXX-1: 20-21. O89

## Call

Ahlswede, Eugene. "So You've Received a Call." (*TLE*) XXI-3: 2-4. F81

Ahlswede, Eugene. "Twelve Month Call, The." (*TLE*) XXIV-4: 2-4. My84

Anonymous. "The Call: Procedures and Considerations." (*TLE*) IX-2: 21. D68

Anonymous. "Guidelines Relative to Teachers' Calls." (*TLE*) VI-2: 18-19. D65

Brick, Delmar. "Call Night Sermonette." (*TLE*) XIX-1: 23-24. O78

CPS. "Teacher Call Activity, 1995." (*PL*) IV-1: 43 Fa95

Fischer, William. "Are You a Part-time Worker?" (*TLE*) XV-3: 16-18. F75

Frey, Im. P. "The Proper Attitude Toward the Call." (*LSB*) XVI-4: 2-3. My46

Glaseke, Vilas. "The Assignment Process". XLVII-3: 89-90. F07. (*TLE*).

Gerlach, Joel. "Teacher! About Your Call ...." (*TLE*) X-1: 2-3. O69

Gerlach, Joel. "More About a Teacher's Call." (*TLE*) X-2: 2-3. D69

Habermann, Elwood. "Christian Teacher and his Calling, The." (*TLE*) IV-4: 2-3. My64

Kolander, David. " 'Being Told What to Do' Deliberating on a Divine Call". XLVI-1: 9-13. O05. (*TLE*).

Krueger, Thomas. "Calling a Teacher." (*PL*) III-1: 21,23 Fa94

Mueller, Wayne. "Understanding the Call." (*LL*). IX-1: 4-7 Fall00

Mueller, Wayne. "The Divine Call: Is It Still the Same? ". XLV-2: 60-62. (*TLE*).

Plath, LeDell. "The WELS Calling Process for Teachers". XLV-3: 74-79. F05. (*TLE*).

Plath, LeDell. "The WELS Calling Process for Teachers." (*TLE*) XXX-3: 64-68. F90

Prahl, Herbert. "How Much?" (*LL*). IX-1: 18-19 Fall00

Reim, E. "Is the Teacher's Call Divine?" (*LSB*) XII-2: 1-2. D41

Schaller, Loren. "Some Thoughts on the Call." (*TLE*) XII-2: 15-16. D71

Schaller, Loren. "Some Thoughts on the Call." (*TLE*) XV-4: 2-3. My75

Schmidt, Wayne. "Is This My Call?" (*TLE*) II-2: 3. D61

Sitz, Herbert. "Editorial." (*LSB*) VI-4: 3-4. Ap36

Wichmann, W.F. "My Call and the Children of My Congregation." (*LSB*) XIV-3: 1-2. F44

Willems, Paul. "What Do You Mean, 'You Have a Call?'" (*TLE*). XL-1: 25-27 O99

## Catechism

Ahlswede, Eugene. "The Large Catechism of Dr. Martin Luther." (*TLE*) XXIV-1: 2-4. O83

- Albrecht, R.M. "The Fifth Commandment (1)." (*LSB*) I-2: 2. n.d.30
- Albrecht, R.M. "The Fifth Commandment (2)." (*LSB*) I-3: 2. n.d.31
- Albrecht, R.M. "The First Commandment (1)." (*LSB*) II-1: 2-3. S31
- Albrecht, R.M. "The First Commandment (2)." (*LSB*) II-2: 2. N31
- Albrecht, R.M. "The First Commandment (3)." (*LSB*) II-4: 6. Mr32
- Albrecht, R.M. "The Second Commandment (1)." (*LSB*) III-2: 2-4. N32
- Albrecht, R.M. "The Second Commandment (2)." (*LSB*) III-3: 2-3. F33
- Albrecht, R.M. "The Third Commandment (1)." (*LSB*) IV-3: 5-6. Ap34
- Albrecht, R.M. "The Third Commandment (2)." (*LSB*) V-1: 5-6. S34
- Albrecht, R.M. "The Fourth Commandment (1)." (*LSB*) V-2: 4. N34
- Albrecht, R.M. "The Fourth Commandment (2)." (*LSB*) V-3: 4. Ja35
- Albrecht, R.M. "The Sixth Commandment." (*LSB*) VI-1: 5-6. O35
- Albrecht, R.M. "The Seventh Commandment." (*LSB*) VI-3: 7-8. F36
- Albrecht, R.M. "The Eighth Commandment." (*LSB*) VI-4: 5-6. Ap36
- Albrecht, R.M. "Catechisation on 'Christ's Descent Into Hell'." (*LSB*) XXII-3: 1-3. F52
- Anonymous. "Bringing the Lutheran Heritage to Our Children." (*TLE*) VII-2: 14-15. D66
- Anonymous. "Concordia Catechism Series." (*TLE*) VIII-3: 15-16. F68
- Anonymous. "Second Draft of the Revised Enchiridion of Luther's Cat.." (*TLE*) XVI-2: 12ff. D75
- Braun, Mark. "Making Young People Effective Talkers for Jesus Christ." (*TLE*) XX-1: 7-9. O79
- Fischer, William. "The New WELS Catechism." (*TLE*) XXII-4: 23. My82
- Fredrich, Edward. "Growing Trees: A Two-Year Lutheran Confirmation Course." (*TLE*) XIII-4: 21-22. My73
- Grunze, Richard. "Catechism Lessons." (*TLE*) XXI-4: 23-24. My81
- Koch, H.A. "Report of the Gausewitz Catechism Revision Committee." (*LSB*) XIX-2: 6-7. D48
- Koch, H.A. "Revision of the Gausewitz Catechism." (*LSB*) XIX-4: 4-8. My49
- Koch, H.A. "Revision of the Gausewitz Catechism." (*LSB*) XX-2: np. D49
- Koch, H.A. "Revision of the Gausewitz Catechism." (*LSB*) XX-3: np. F50
- Koch, H.A. "Revision of the Gausewitz Catechism." (*LSB*) XX-4: np. My50
- Koch, H.A. "Revision of the Gausewitz Catechism." (*LSB*) XXI-1: np. O50
- Koch, H.A. "Revision of the Gausewitz Catechism." (*LSB*) XXI-4: np. My51
- Koch, H.A. "Revision of the Gausewitz Catechism." (*LSB*) XXII-2: np. D51
- Koch, H.A. "Revision of the Gausewitz Catechism." (*LSB*) XXII-3: np. F52
- Koch, H.A. "Revision of the Gausewitz Catechism." (*LSB*) XXII-4: np. My52
- Koch, H.A. "Revision of the Gausewitz Catechism." (*LSB*) XXIII-1: np. O52
- Koch, H.A. "Revision of the Gausewitz Catechism." (*LSB*) XXIII-2: np. D52
- Koch, H.A. "Revision of the Gausewitz Catechism." (*LSB*) XXIII-3: np. F53
- Koch, H.A. "Revision of the Gausewitz Catechism." (*LSB*) XXIII-4: 5-11. My53
- Koch, H.A. "Revision of the Gausewitz Catechism." (*LSB*) XXIV-1: 5-10. O53
- Koelpin, Arnold. "Luther's Catechisms: Brickbats and Plaudits." (*TLE*) XIX-4: 21-23. My79
- Krause, Richard. "Teaching the Catechism at Home." (*TLE*) XXXV-4: 100-103 My95
- Kuske, David. "The 9th and 10th Commandments; Another View." (*TLE*) XXXI-2: 37-40. D90
- Kuster, Thomas. "The Final Fifth of God's Will." (*TLE*) XXX-3: 58-63. F90
- Lawrenz, Carl. "Practical Application of the Fifth Commandment." (*LSB*) XXIX-2: 3-6. D58
- Lenz, Mark. "Teaching Children to Pray the Catechism." (*TLE*) XLII-2:35 D01
- Lenz, Mark. "A Golden Chain Around the Neck." (*TLE*) XLIII-2: 35 D02.
- Scharf, Erwin. "Tool to be Cherished, A." (*TLE*) VII-4: 9-11. My67
- Schlieve, Richard. "The Doxology of the Lord's Prayer." (*TLE*) XXVIII-4: 76-77. My88
- Stindt, A.C. "A Practical Lesson in the Teaching of Catechism." (*LSB*) X-2: 3-4. D39
- Warnke, Harold. "Dr. Luther's Small Catechism: Its Value." (*TLE*) XX-1: 5-6. O79
- Warnke, Harold. "Dr. Luther's Small Catechism: Its Use." (*TLE*) XX-2: 5-6. D79
- Wendland, Shirley. "Practical Application of the Third Commandment to School Life." (*LSB*) XXX-4: 3-4. My60
- Wichmann, W.F. "How Our Children May See Evil of Boy Scout Through Catechism." (*LSB*) XXIV-4: 3-6. My4
- Wicke, Harold. "We Should Fear, Love, and Trust in God Above All Things." (*LSB*) XXIX-3: 3-5. F59

## Certification

Anonymous. "Guidelines Relative to the Listing of Certified Teachers...." (*TLE*) I-4: 21-22. My61

- Anonymous. "Regulations for Certification." (*TLE*) VI-2: 16-18. D65
- Anonymous. "Emergency Teacher Training Course." (*LSB*) XXVI-2: 8. D55
- Busack, Dianne + Wormer. "A Look Inward: School Self-Study." (*PL*) II-2: 14 Sp94
- Krueger, William. "The Bugaboo of Certification." (*LSB*) XXX-3: 4-6. F60
- Wormer, Diane + Busack. "A Look Inward: School Self-Study." (*PL*) II-2: 14 Sp94

## Child Abuse

- Fehlauer, Jeanne. "Annie's Ordeal." (*LP*). VII-6: 6-7 July/Aug 00
- Vieth, Victor. "Confront the Horrendous Evil." (*LP*). VII-6: 6-8 July/Aug 00

## Children

- Ahlswede, Eugene. "Luther's Love for Children." (*TLE*) XXIII-3: 2-5. F83
- Ahlswede, Eugene. "Sexual Abuse of Children, The." (*TLE*) XXVII-2: 1-2. D86
- Arndt, Emanuel. "A Suggested List of Books for Your School Library." (*TLE*) II-1: 16-18. O61
- Averbeck, Robert. "Sociogram, The." (*TLE*) VII-1: 9-10. O66
- Bauer, Jackie. "And Have a Nice Ride." (*LP*) V-2:8 Nov/Dec 1997
- Baumler, Gary. "Promises Mean Everything to a Child." (*PL*) III-1: 30-31 Fa94
- Becker, James. "I'm Adopted." (*LL*). VIII-1: 28-29 Fa99
- Beres, Pamela Holtz. "Kids--Cliques and Clubs." (*LP*). VII-5: 12-13 May/June00
- Biedenbender, Laurie. "Children: On Loan." (*LP*) XI-5: 31 May/Jun04.
- Bierwagen, Bertha. "Mom, May I Have 25 Cents?" (*TLE*) VIII-2: 4-5. D67
- Bliefernicht, E.R. "The Teacher Studies the Temperament of the Child." (*LSB*) XVI-1: 2-3. O45
- Braun, John. "Hummingbirds Don't Know the Words." (*LP*) VI-2: 5 Nov/Dec98
- Burmeister, Paul. "What Friends are For." (*LP*) IX-5: 8 Ma/Ju 02
- Czer, Ramona. "Sisterly Love." (*LP*) V-2:10-11 Nov/Dec 1997
- Davis, Lyndee. "Another Ice Cream Day." (*LP*) XI-6: 32 July/Aug04.
- Eggert, Kurt. "The Reformation Festival." (*TLE*) VII-4: 21-23. My67
- Fellers, Debera. "You Want Me to do What?" (*PL*) III-2: 21,23 Sp95
- Ferch, Dawn. "Brain-based Learning—Rediscovered." (*TLE*) XXXVII-1: 20-22 O96
- Fischer, Gervasius. "The Children's Christmas Eve Service."

- (*TLE*) I-2: 14-17. D60
- Flunker, Charles. "Ascension Day Sermon By Children, An." (*TLE*) VII-3: 8-9. F67
- Galstad, Martin. "The Value of the Child." (*ELS*). VII: 2,4,8 Sp/Su 2000
- Gerlach, Jackie. "Teaching Children to Sing on Pitch." (*PL*) IV-3: 28-29 Su96
- Gerlach, Joel. "Total Child Control—Again." (*TLE*) XIII-1: 2-3. O72
- Gourley, Myrtle. "A Mother's Report on Comic Books." (*LSB*) XXVI-1: 3. O55
- Gronholz, Carol. "I Love You, Teacher." (*TLE*) XLIII-1: 16-18 O02.
- Gruenewald, Cindy. "Our Friends Next Door." (*LL*) V-2:18-19 Wi97
- Grunze, Richard. "Skirting the Edges of Humanism." (*TLE*) XXVIII-1: 19-23. O87
- Hasley, Karen. "Putting Hobbits to Work." (*TLE*) XVII-1: 14-15. O76
- Hellermann, William. "Training Children to Find Pleasure in Their Faith-Life." (*LSB*) XXVIII-3: 2-5. F58
- Helwig, Donald. "Devotions Written and Led by Children." (*TLE*) XVIII-1: 12-13. O77
- Holman, Cindi. "Young Worshipers." (*PL*) IV-3: 26-27 Su96
- Jacobs, Paul. "Teaching Children to Witness." (*PL*) IV-1: 39-40 Fa95
- Jacobson, Gerald. "Fantastic Journeys of George MacDonald." (*TLE*) XVIII-1: 20-22. O77
- Jacobson, Gerald. "Know Your Writers." (*TLE*) XX-2: 20-21. D79
- Jeske, Mark. "Why Johnny Doesn't Go to Church." (*TLE*) XXIII-1: 12-15. O82
- Jeske, Mark. "Ten Hard Questions About Baptism." (*TLE*) XXV-2: 9-12. D84
- Juern, John. "Beyond having a Bad Day." (*LP*) VI-5: 4: May/June99
- Kastens, Gerald. "And I Can Go and Tell." (*PL*) III-3: 24-25 Su95
- Kastens, Gerald. "For Tomorrow." (*LL*). VIII-3 4-7 Sp00
- Kastens, Gerald. "Strong Roots for Tender Shoots." (*TLE*). XL-4: 112-114 My00
- Kehl, Leslie. "Recognizing the Influence of Modern Trends on Child's Character." (*LSB*) XXV-1: 4-8. O54
- Koeller, Ardia. "Putting Self Into Self-discipline." (*LP*) III-6: 9-10. July/Aug 96
- Koelpin, Arnold. "From Infancy." (*TLE*) XXXVI-3: 89-90 F96
- Koeninger, L. "Whose is the Child?" (*LSB*) XXI-4: 1-2. My51
- Kremer, Kenneth. "Consider Weekly Services for the Children." (*PL*) III-3: 32 Su95
- Kremer, Marlis. "If Toys Talked." (*LP*) VI-2: 7-8 Nov/Dec98
- Lehninger, Jeanne. "Children, Pets, and Power." (*LP*) III-4: 8-9. Mar/Apr 96

- Lenz, Mark. "The Ugly Pupil." (*TLE*) XXXIX-2: 35 D98
- Leyrer, Philip. "Just One Step." (*LP*) VI-5: 10-11  
May/June99
- Loomis, Cheryl. "Merely Child's Play." (*LP*). VII-2: 12-13  
Nov/Dec 99
- Lorfeld, Dale. "Loyal to Christ—On the Godly Road to  
Christian Adulthood." (*PL*) III-2: 22-23 Sp95
- Mahnke, Jon. "The Child as a Missionary." (*LSB*) XXIX-1:  
1-6. O58
- Mattek, John. "Children's Church Attendance." (*TLE*) II-3:  
8-9. F62
- McLean, Irma. "Through Children's Eyes." (*TLE*) XXXVI-  
4: 99 M96
- Meyer, Edward. "Critical Periods in the Musical  
Development of Children." (*TLE*) XVIII-1: 17-19.  
O77
- Miller, John. "Calm and Hope Beyond the Storm." (*LP*) VI-  
5: 6-8 May/June99
- Nell, Christine. "Teaching Children to Witness." (*PL*) I-2:  
38-39 Sp93
- Neuman, Kevin. "Evangelism is for Children Too." (*PL*) III-  
3: 19,21 Su95
- Petermann, Kurt. "Forcing Adulthood." (*TLE*) XXI-3: 22-  
24. F81
- Petermann, Kurt. "A Children's Reformation Service."  
(*TLE*) XXIII-1: 6-8. O82
- Ponath, Ann. "Welcome Home." (*LP*) XI-6: 30-31  
July/Aug04.
- Reed, Linda Evenson. "Torn by Divorce." (*LP*)IV-6:4-6  
July/Aug 1997
- Rendahl, Frieda. "Living on the Edge or Living  
Abundantly." (*LP*). VII-5: 14-15 May/June00
- Rohda, Dudley. "My Kingdom is Not of This World."  
(*LSB*) XXIV-1: 1-4. O53
- Schaller, Egbert. "A Blessed Fellowship." (*LSB*) XXIV-3: 1-  
2. F54
- Schmeling, Daniel. "Love is Ageless." (*TLE*) XXIV-1: 11-13.  
O83
- Schuetze, Victoria. "Timmy Begins School." (*TLE*) V-1: 4-5.  
O64
- Schuetze, Victoria. "Stimulating the Young Child." (*TLE*)  
VI-1: 6-7. O65
- Schultz, Anthony. "Where Have All the Heroes Gone?"  
(*PL*) IV-2: 35-37 Sp96
- Schulz, Anthony. "The Cry Room." (*LP*) VI-3: 5 Jan/Feb 99
- Schulz, Arthur. "Sing Out For Books." (*TLE*) VI-2: 10-11.  
D65
- Schulz, Arthur. "Intermediate Grade Child and His Teacher,  
The." (*TLE*) VIII-4: 8-11. My68
- Schumann, Dolores. "Rhythmic Activities in the Primary  
Grades." (*TLE*) I-1: 4-5. O60
- Sievert, Ada. "Reflections." (*TLE*) II-1: 4-5. O61
- Sievert, Erich. "Upper Grade Child and his Teacher, The."  
(*TLE*) VIII-4: 12-14. My68
- Sims, Melinda. "New Plans for Wellspring." (*PL*) III-3: 33-  
34 Su95
- Smith, Robyn. "Stranger Danger." (*LP*) X-6: 28-29 Ju/Au  
03.
- Smith, Kristen. "All in the Balance." (*LP*) IX-5: 14 Ma/Ju 02
- Staab, William. "Ethics of the Lutheran Teacher (2)." (*TLE*)  
XX-4: 10-13. My80
- Stoekli, Winfred. "Training Children to Apply Christian  
Principles in Social Life." (*LSB*) XXIV-1: 12-14. O53
- Weber, Joanne. "Book Fair." (*PL*) III-3: 35-36 Su95
- Weiss, Monica. "When the Children Play, the Teacher  
Should ...." (*TLE*) XXXVII-1: 28-30 O96
- Winkel, Timothy. "Self-Esteem." (*LP*) III-6: 12-13. July/Aug  
96
- Woltmann, William. "Teacher-Pupil Relations in the  
Intermediate Grades." (*TLE*) I-1: 6-7. O60
- Woltmann, William. "Children's Participation in  
Congregational Activities." (*TLE*) XI-4: 12-13. My71
- Woldt, Michael. "Question and Answer." (*LP*)IV-6:15  
July/Aug 1997
- Zimmermann, Doris. "Primary Grade Child and His  
Teacher, The." (*TLE*) VIII-4: 6-7. My68

## Choir

- Adickes, David. "Double or Nothing." (*TLE*) XVI-4: 20-22.  
My76
- Albrecht, Martin. "Are You a Choir Director?" (*TLE*) I-3:  
16-18. F61
- Albrecht, Martin. "What is Happening to Our School Music  
Course?" (*TLE*) II-1: 12-14. O61
- Albrecht, Martin. "Choosing Proper Choir Music for the  
Church Service." (*TLE*) II-4: 16-18. My62
- Albrecht, Martin. "How May The Interest of Choir  
Members in .... Be Encouraged." (*LSB*) IX-3: 3-5. F39
- Albrecht, Martin. "Have You Started Your Choir?" (*TLE*)  
X-2: 19-21. D69
- Backer, Emil. "The Choir Leader and Organist." (*LSB*) II-3:  
5-6. J32
- Backer, Emil. "The Organist and the Choir Leader." (*LSB*)  
II-4: 4-5. Mr32
- Backer, Emil. "Choir and Organ Music for the Christmas  
Season." (*LSB*) III-2: 5-6. N32
- Backer, Emil. "Choir and Organ Music for the Lenten and  
Easter Season." (*LSB*) III-3: 4. F33
- Backer, Emil. "Choir Music." (*LSB*) IV-3: 2-3. Ap34
- Bolle, Carl. "Church Music With Special Emphasis on the  
Choir." (*LSB*) XV-2: 2-3. D44
- Christiansen, F. Melius. "The Combination of Words and  
Music." (*LSB*) VII-4: 5-6. My37
- Gerlach, Bryan. "Choral Stewardship? Try a Motet Choir."  
(*PL*) III-1: 16-17 Fa94
- Meyer, Edward. "Junior Choirs." (*TLE*) XIX-1: 15-17. O78
- Meyer, Edward. "Small Choirs." (*TLE*) XX-4: 18-20. My80
- Peterson, Jon. "The Lutheran Secondary School Choral  
Program: A Perspective for the 90s." (*TLE*) XXXI-1:

14-18. O90

- Pfeifer, Mike. "Motivation and Interest in the High School Choral Program." (*TLE*) XXI-1: 17-19. O80
- Satorius, Carl and Miriam. "Singing in the Choir." (*LL*) VII-2: 20-21 W199
- Shilling, Ronald. "Service Playing: Accompanying the Choir and Soloist." (*TLE*) XVI-4: 17-19. My76
- Westendorf, Rolfe. "The Men's Choir Sings Again." (*TLE*) XXII-3: 22-24. F82

## Christian Education

- Ahlswede, Eugene. "Luther's Commitment to Christian Education." (*TLE*) XXIII-1: 3-5. O82
- Ahlswede, Eugene. "Resist Beginnings." (*TLE*) XXIV-3: 17. F84
- Anonymous. "Foreword." (*LSB*) I-1: 1. N30
- Anonymous. "Synodical Resolutions Pertaining to Parish Education." (*TLE*) XII-1: 23. O71
- Averbeck, Robert. "Observing 125 Years of Grace in Our Schools." (*TLE*) XV-1: 7-9. O74
- Bauer, Gerhard. "From a Principal to His Staff." (*TLE*) IX-1: 7. O68
- Becker, Siegbert. "Danger of Overemphasizing Academic Achievement." (*TLE*) XIV-4: 2-5. My74
- Beulow, Ronald. "Being About Our Father's Business." (*ELS*) V: 1-2 Sp99
- Board for Parish Education. "A Statement on the Philosophy of Christian Education." (*LSB*) XXX-2: 3-4. D59
- Born, Silas. "Our Future is in the Past." (*ELS*) I-1: 6 Fa 97
- Braun, John. "Sunrise or Sunset? What's Ahead for Confessional Lutheran Education". XLVII-3: 70-78. F07. (*TLE*).
- Braun, Mark. "Moses Offers a Program of Christian Education." (*TLE*) XXII-1: 5-8. O81
- Burk, Milton. "Blessed Advantages of Christian Schooling." (*TLE*) XVI-4: 4-5. My76
- Czer, Ramona. "Through Faith-Colored Glasses." (*TLE*) XXXIII-3: 95-96. F93
- Fairbairn, Helen. "You Can Go Home Again." (*TLE*) XXIV-4: 19-20. My84
- Freese, John. "Future Trends and Lutheran Education." (*TLE*) XL-3: 87-91 F00
- Gerlach, Joel. "Educational Goals." (*TLE*) IX-3: 2-4. F69
- Gieschen, Henry. "The Wind is Contrary." (*LSB*) IX-4 1-3. My39
- Goede, Ned. "Lutheran School Culture." (*LL*). VII-4: 24-25 Su99
- Gieschen, Henry. "School Sermon." (*LSB*) XX-4: 1-3. My50
- Gieschen, Paul. "The School and Its Missionary Character." (*LSB*) VIII-4: 1-3. My38
- Grunze, Richard. "Church History—Frosted Cake? or Staple Fare?" (*TLE*) XXVI-2: 4-7. D85
- Hagedorn, Fred. "Christian Education." (*TLE*) III-2: 6-7.

D62

- Heier, Otto. "The Constraint of the Love of Christ in Our Training Program." (*LSB*) XXVIII-4: 1-2. My58
- Hewitt, James. "School Closings a Blessing?" (*TLE*) XXVI-2: 16-18. D85
- Hochmuth, Robert. "Shem, Ham, and Jane." (*TLE*) XIV-2: 2-3. D73
- Hochmuth, Robert. "Turks, Wars, and Floods." (*TLE*) XIX-4: 2-4. My79
- Hochmuth, Robert. "What About Our Offense?" (*TLE*) XVIII-2: 2-4. D77
- Hochmuth, Robert. "In the Margin." (*TLE*) XX-4: 2-4. My80
- Isch, John. "School's In." (*TLE*) XXX-1: 3. O89
- Isch, John. "When Did School Begin This Fall?" (*TLE*) XXXII-1: 3. O91
- Isch, John R. "Attitudes Toward Lutheran Schools: A 1992 Survey." (*TLE*) XXXIII-1: 18-23. O92
- Isch, John. "Only WELS People Will Be In Heaven." (*TLE*). XL-1: 3 O99
- Jacobson, Gerald. "Reformation Educational Thought." (*TLE*) XIX-1: 18-20. O78
- Janke, Philip. "Church's Curriculum Centers on Christ, The." (*TLE*) VI-1: 16-18. O65
- Janke, Philip. "Church's Curriculum Centers on Christ, The." (*TLE*) XXV-4: 4-7. My85
- Kastens, Gerald. "Any Day but Sunday." (*LL*) VI-3: 18-19 Sp98
- Kiessling, Elmer. "Luther and Christian Education (1)." (*LSB*) XXVII-1: 3-4. O56
- Kiessling, Elmer. "Luther and Christian Education (2)." (*LSB*) XXVII-2: 3-4. D56
- Kiessling, Elmer. "Luther and Christian Education (3)." (*LSB*) XXVII-3: 3-4. F57
- Kiessling, Elmer. "Luther and Christian Education." (*LSB*) XXVII-4: 3-4. My57
- Klatt, H.R. "Thoughts on Education." (*TLE*) II-1: 20. O61
- Klatt, H.R. "Seeking the Major Premise Through the Ages." (*TLE*) III-3: 17-18. F63
- Klatt, H.R. "Educational Changes in our Present Changing World." (*LSB*) VIII-3: 2-5. F37
- Klatt, H.R. "An Appraisal of Educational Principles in the Light of Scrip." (*LSB*) XIV-4: 2-4. My44
- Klatt, H.R. "Thoughts on Education." (*LSB*) XIV-4: 3. My44
- Klatt, H.R. "An Evaluation of the World's Philosophy of Education." (*LSB*) XVIII-4: 5-6. My48
- Klatt, Harold. "Prominent Educators Since the Days of Luther: Comenius." (*LSB*) XVI-1: 3. O45
- Koeninger, L. "Whose is the Child?" (*LSB*) XXI-4: 1-2. My51
- Koester, A.H. "What Makes a Lutheran School a Christian Day School." (*LSB*) XXX-3: 1-4. F60
- Kowalke, E.E. "Christian Education." (*LSB*) X-4: 1-2. My40
- Kretzmann, P. E. "What We Owe Our Children." (*ELS*).

VI: 2,4 Fa99  
 Krueger, William. "Indoctrination: The Father of Individualism." (*TLE*) V-1: 2-3. O64  
 LaGrow, George. "Reach Out with Schools." (*LL*) XI-2: 26-27 Wi03.  
 Leyrer, Philip. "Excellence in the Marketplace". XLIV-3: 67. F03. (*TLE*).  
 Loomis, Cheryl. "Patience and Understanding". XLIV-4: 99, M04. (*TLE*).  
 Loppnow, Laura and Larry Collyard. "What To Teach and Why." (*LP*). VIII-1: 14 Sep/Oct00  
 Manthey, W.H. "Conference Address." (*LSB*) VII-4: 1-2. My37  
 Meyer, F.W. "Defense." (*LSB*) XI-2: 2-3. D40  
 Meyer, F.W. "Scripture Versus Philosophy." (*LSB*) XI-4: 3. My41  
 Meyer, F.W. "No Change of Viewpoint or Aim." (*LSB*) XIV-1: 2-3. S43  
 Meyer, F.W. "Christian Schools Provide Spiritual Education." (*LSB*) XIV-3: 2-3. F44  
 Mischke, Carl. "Grace 125 and Christian Education." (*TLE*) XV-1: 2-4. O74  
 Nelson, Jason. "Lutheran Schools Go." (*LL*). VIII-2:20-21 Wi00  
 Nelson, Jason. "Let's Take Our Cues from the Children! ". XIII-2 20-21 Wi05. (*LL*).  
 Nelson, Joel. "ORLS—A One-room School." (*TLE*) XXVII-2: 2-4. D86  
 Pape, Ronald. "Take Your Choice." (*TLE*) VI-1: 4-5. O65  
 Petermann, Kurt. "Quo Vadis." (*TLE*) V-3: 2-3. F65  
 Petermann, Kurt. "Up Periscope! What's Happening?" (*TLE*) XXIII-4: 6-8. My83  
 Plath, LeDell. "Just What We Needed." (*PL*) I-2: 41-42 Sp93  
 Polzin, Barbara. "A Place to Flourish." (*LP*) IX-6:15 July/Aug02  
 Raabe, James. "Let's State our Christian Philosophy." (*TLE*) XIX-1: 21-22. O78  
 Raabe, John. "Does the Christian Training of the Home, School, Church ...." (*LSB*) XV-4: 1-2. My45  
 Rauschke, Armin. "The Objective of the Lutheran School." (*LSB*) XXII-4: 1-6. My52  
 Ruege, Paul. "Teaching the Way the Master Taught." (*TLE*) V-1: 10-15. O64  
 Russow, Howard. "How Luther Stressed the Importance of Christian Training." (*TLE*) VII-4: 2-3. My67  
 Sauer, Theodore. "What Can Be Done to Promote a CDS in Those Congregations Which have None." (*LSB*) XXII-4: 6-8. My52  
 Schaller, Egbert. "The Spectre of Post-war Dangers Confronting Our Christian Education." (*LSB*) XVI-1: 1-2. O45  
 Schaller, W. "Inspiring Principles of Education From Inspired Educators (John)." (*LSB*) XIX-3: 2-3. F49  
 Schink, W.F. "Inspiring Principles of Education From Inspired Educators (Solomon)." (*LSB*) XIX-2: 1-2. D48

Schmeling, Daniel. "Families: A Focus of the Lutheran Schools' Mission." (*PL*) III-1: 18-19 Fa94  
 Schmeling, Daniel. "Lutheran Schools Now." (*LL*). VIII-3: 18-19 Sp00  
 Schuetze, Armin. "Inspiring Principles of Education From Inspired Educators (Moses)." (*LSB*) XIX-1: 1-2. O48  
 Schultz, Dennis. "Going Public?" (*TLE*) XXVII-2: 13-15. D86  
 Schweppe, Carl. "The Challenge to Education." (*LSB*) III-1: 1-4. O32  
 Sellnow, David. "Teaching a Love for Souls". XLV-4: 99. M05. (*TLE*).  
 Serrahn, Louis. "Christian Child Training (Erziehung)." (*LSB*) IV-2: 1-6. M34  
 Siegler, Oscar. "The Fear of the Lord is the Beginning of Wisdom." (*TLE*) III-3: 11-14. F63  
 Sievert, Erich. "Teacher Learned Me." (*TLE*) III-3: 6-8. F63  
 Singer, Gregg. "Why Evangelical Colleges Die." (*TLE*) III-2: 15-16. D62  
 Sitz, Herbert. "Address to the Minnesota Lutheran Teachers Conference." (*LSB*) XII-2: 3-4. D41  
 Stone, Rue. "A Prayer for Our Schools." (*TLE*) XXXIII-1: 25. O92  
 Stuebs, Arden. "Train Up a Child in the Way He Is To Go." (*TLE*) XIV-3: 24. F74  
 Warnke, Harold. "God's Grace has Guided Us." (*TLE*) XV-2: 6-8. D74  
 Wegner, Walter. "Feed My Lambs." (*LSB*) XXVI-4: 1-3. My56  
 Westerhaus, G.A. "Tracing Christian Education in the Early Church (1)." (*LSB*) XIV-1: 1-2. S43  
 Westerhaus, G.A. "Tracing Christian Education in the Early Church (2)." (*LSB*) XIV-2: 3-4. D43  
 Willems, Paul. "Where Experiments End". XLV-4: 102-104. M05. (*TLE*).

## Christmas

Albrecht, Carol. "The Christmas Challenge: A gift of Love." (*LP*) IX-2: 10-11 Nov/Dec 01  
 Albrecht, Carol. "Noni's Christmas Joy." (*LP*) X-2: 4-5 Nov/Dec02.  
 Anonymous. "Christmas." (*LSB*) VII-2: 2-3. D36  
 Backer, Emil. "Choir and Organ Music for the Christmas Season." (*LSB*) III-2: 5-6. N32  
 Bartel, Fred. "Music Ideas for Christmas Eve." (*TLE*) XX-1: 19-21. O79  
 Bitter, Mark. "An Outreach Program: Christmas for Kids." (*PL*) I-3: 46-47 Su93  
 Brenner, John. "Let Us Now Go Even Unto Bethlehem." (*LSB*) XXX-2: 1-2. D59  
 Cares, Mark. "Christmas for Adults." (*PL*) IV-3: 42-43 Su96  
 Carpenter, Craig. "Tradition." (*LP*) VI-2: 16 Nov/Dec98  
 Carpenter, Craig. "All I Want for Christmas." (*LP*) IX-2: 16 Nov/Dec 01  
 Drews, Evelyn. "Art For Christmas and Those Long Winter

Months." (*TLE*) XIV-2: 11-13. D73

Eggert, Kurt. "What Kind of Christmas Celebration?" (*TLE*) VI-2: 2-5. D65

Fischer, Gervasius. "The Children's Christmas Eve Service." (*TLE*) I-2: 14-17. D60

Fischer, Gervasius. "The Children's Christmas Eve Service." (*LSB*) XI-2: 1-2. D40

Gieschen, Waldemar. "Vignettes From Luther For Christmas." (*LSB*) XXVI-2: 1-3. D55

Grummert, Donald. "Your Christmas Joy." (*LSB*) XXVII-2: 1-2. D56

Habeck, Irwin. "Christmas in the Classroom." (*LSB*) XVI-2: 1-2. D45

Hartzell, Eric. "A Christmas Conspiracy." (*LP*). VII-2: 5 Nov/Dec 99

Helwig, Donald. "Classroom Christmas Party?" (*TLE*) XVIII-2: 11-12. D77

Hoenecke, Edgar. "An Annual Challenge: Preparing a Children's Christmas Eve Service." (*PL*) IV-3: 24-25 Su96

Jahns, Thad. "Not Just Some Old Customs." (*LP*) XI-2: 28-29 Nov/Dec 03.

Kastens, Gerald. "Bring Jesus' Birth to Life." (*PL*) IV-3: 39-40 Su96

Kehl, Eulora. "Christmas Gifts for Mothers." (*TLE*) I-2: 4-5. D60

Kiessling, Elmer. "With Luther in the Classroom at Christmas." (*TLE*) V-2: 2-3. D64

Kolander, Kenneth. "Sunday School and the Christmas Service, The." (*TLE*) XIV-2: 14-15. D73

Kruschel, Peter. "All in the Preparation." (*LP*). VII-2: 10-11 Nov/Dec 99

Kraus, Karl. "Miracle of Love, The." (*TLE*) XVII-2: 2-4. D76

Kremer, Marlis. "If Toys Talked." (*LP*) VI-2: 7-8 Nov/Dec98

Miller, John. "Calm and Hope Beyond the Storm." (*LP*) VI-5: 6-8 May/June99

Quandt, Lillian. "Let's Make Christmas Gifts." (*TLE*) X-2: 4-5. D69

Radtke, G. "How Our Christmas Joy Reveals Itself." (*LSB*) XXV-2: 1-2. D54

Schaller, Adalbert. "Christmas on the Air." (*LSB*) XII-2: 2-3. D41

Schaller, Egbert. "Is There Room for Improvement in Our Children's Christ Eve .." (*LSB*) XXI-2: 1-2. D50

Schuetze, Armin. "Receiving the Christchild as Little Children." (*LSB*) XXIV-2: 1-2. D53

Uhlig, Ruth. "The Role of Santa Claus in the Christian Day School." (*LSB*) XX-1: 5-7. O49

Wenzel, Kenneth. "Children's Christmas Eve Service Outline." (*TLE*) XXVI-1: 8-10. O85

## Church and State

Advisory Committee on Education. "Governmental Aid to Education." (*TLE*) VIII-1: 13-20. O67

Anonymous. "Accreditation of Dr. Martin Luther College." (*TLE*) IV-1: 18. O63

Anonymous. "Statement Re Federal Aid to Church-Related Schools." (*TLE*) IV-1: 19-20. O63

Anonymous. "Guidelines for Participating in Social Security by Women Teachers." (*TLE*) XI-2: 21. D70

Eckert, Paul. "Released Time—A Good Answer for Part-time Agencies?" (*TLE*) XIII-1: 14-16. O72

Fehlauer, Adolph. "Elementary and Secondary Education, The." (*TLE*) VI-3: 19-22. F66

Fehlauer, Adolph. "Shall My School Participate?" (*TLE*) VIII-1: 21-22. O67

Gerlach, Joel. "Total Child Control—Again." (*TLE*) XIII-1: 2-3. O72

Gerlach, Joel. "Christian Liberty and Religious Freedom." (*TLE*) XVI-1: 2-3. O75

Grunze, Richard. "The Bicentennial of the Federal Constitution." (*TLE*) XXVIII-4: 1-4. O87

Hartig, Vicki. "Our Political Legacy." (*LP*) III-6: 6-7. July/Aug 96

Heier, Otto. "Religion in the Public School." (*TLE*) I-2: 2-3. D60

Huebner, Lloyd. "The State, Christianity, Spiritual Values." (*TLE*) IX-1: 12-14. O68

Kowalke, E.E. "Separation of Church and State." (*LSB*) XVII-2: 4-6. D46

Krueger, William. "The Bugaboo of Certification." (*LSB*) XXX-3: 4-6. F60

Naumann, Oscar. "Religion in the Public Schools." (*TLE*) I-3: 14-15. F61

Otto, Karl. "Released-Time Classes." (*TLE*) II-4: 13-15. My62

Petermann, Kurt. "Absenteeism Syndrome, The." (*TLE*) XXI-2: 8-9. D80

Schulz, Arthur. "Accreditation—Certification, 1963." (*TLE*) IV-2: 12-14. D63

Sievert, Robert. "Government Aid to Parochial Schools - Opportunity or Oblig .." (*TLE*) XXII-2: 11-13. D81

Warnke, Harold. "High and Impregnable Wall, The." (*TLE*) II-4: 10-12. My62

## Classroom

Anonymous. "I Am a Classroom." (*TLE*) XXVII-3: 13-14. F87

Arndt, Mrs. Emanuel. "Making the Classroom Inviting." (*LSB*) XXX-1: 4-5. O59

Averbeck, Robert. "Learning Center Activities." (*TLE*) XVI-1: 7-8. O75

Huebner, Lloyd. "Classroom Atmosphere." (*TLE*) VIII-2: 8-10. C67

Huhn, Armin. "Time Saving Suggestions for the Teacher." (*LSB*) XXVI-1: 4-5. O55

- Humann, E. "How to Make and Keep a Classroom Attractive." (*LSB*) XXVII-4: 6-8. My57
- Humann, Mrs. E. "How to Make and Keep a Classroom Attractive." (*TLE*) XVII-4: 11-13. My77
- Krause, Carol. "Multi-Graded Classroom." (*TLE*) XVI-2: 6-7. D75
- Leyrer, Phil. "Where Training Begins." (*LL*) VII-2: 8-10. Wi99
- Moldenhauer, Robert. "Time-Saving Suggestions for the Teacher." (*LSB*) XXVI-2: 3-5. D55
- Panning, Frederick. "Comparing Departmentalization and the Self-Contained Classroom." (*TLE*) VIII-3: 6-7. F68
- Pape, Ronald. "Grouping." (*TLE*) IX-3: 13-16. F69
- Schultz, John. "Organizational Considerations for Individualized Learning." (*TLE*) XV-4: 11-13. My75
- Schulz, Arthur. "Departmentalization." (*TLE*) VIII-3: 8-11. F68
- Stindt, A.C. "The Daily Program." (*LSB*) II-1: 7. S31
- Stindt, A.C. "The Daily Program." (*LSB*) II-2: 2. N31
- Stindt, A.C. "A Suggested Program." (*LSB*) IV-1: 6. O33
- Stindt, A.C. "Time Allotment and Order of Subjects in the Daily Program." (*LSB*) VIII-1: 5. S37
- Thiesfeldt, Gregory. "Improving School Climate." (*TLE*) XXVIII-3: 64-68. F88

## College

- Ahlswede, Eugene. "Happy Birthday, DMLC." (*TLE*) XXV-2: 6. D84
- Anonymous. "Accreditation of Dr. Martin Luther College." (*TLE*) IV-1: 18. O63
- Anonymous. "DMLC—Ninety Years Old." (*TLE*) XV-1: 24. O74
- Anonymous. "Wisconsin Lutheran College." (*TLE*) XVI-2: 22. D75
- Anonymous. "Emergency Teacher Training Course." (*LSB*) XXVI-2: 8. D55
- Borgwardt, Wayne. "Parish Student Assistance Programs." (*PL*) I-3: 32 Su93
- Brutlag, Ronald. "Teachers as Recruiters". XLV-4: 113-114. M05. (*TLE*).
- Collyard, Larry. "Old Friends: Impressions of Summer School at DMLC." (*TLE*) XXX-1: 16-17. O89
- Czer, Ramona. "Befriending Connie." (*TLE*). XL-4: 115-121. My00
- Danell, Alice. "Come and Peek". XLV-2: 56. D04. (*TLE*).
- Eickmann, Paul. "The Liberal Arts in the Education of WELS Ministers." (*TLE*) XXXI-1: 8-13. O90
- Fischer, Gilbert. "DMLC Moves Into Media." (*TLE*) XIV-3: 18-19. F74
- Franzmann, Martin. "An Educational Ideal." (*LSB*) XI-3: 1-3. F41
- Gieschen, Paul. "Formal Opening of the Milwaukee Lutheran Teachers College." (*TLE*) I-1: 18-19. O60
- Griffith, Brenda. "A Prayer on Reading Burtchaell." (*TLE*) XLII-1:26-31 O01
- Hagedorn, Grace. "Why Did You Volunteer?" (*TLE*) XX-4: 13-14. My80
- Hartwig, Theodore. "College Life at Oxford." (*TLE*) XXIII-2: 8-10. D82
- Isch, John. "Changes, changes." (*TLE*) XXXVI-1: 3 O95
- Isch, John. "A Survey Regarding Teacher Graduates of Martin Luther College." (*TLE*) XXXVIII-3:75-90 F98
- Isch, John. "How Is MLC Doing: The Alumni Respond." (*TLE*). XLI-2: 53-59 D00
- Isch, John. "Two New Initiatives at MLC". XLIV-3: 68-71. F04. (*TLE*).
- Koestler, Arlen. "A Step Update from DMLC." (*TLE*) XXXII-3: 68-71. F92
- Kowalke, E.E. "Commencement Address, Northwestern College." (*LSB*) XV-4: 2-3. My45
- Leyrer, Philip. "Two Innocent Questions About Teacher Training in the WELS". XLVI-3: 92-96. F06. (*TLE*).
- Olsen, Theodore. "MLC-Yesterday, Today, and Tomorrow: President's Perspective". XLV-2: 38-40. D04. (*TLE*).
- Paulsen, John. "Continuing Education". XLV-3: 79. F05. (*TLE*).
- Reinhard, Renee. "A Response." (*TLE*) XXXIX-1: 13-14 O98
- Schone, Jeffrey. "Assessing the Mission Statement of Martin Luther College from a Student Affairs Perspective". XLVI-1: 14-20. O05. (*TLE*).
- Schulz, Arthur. "Accreditation—Certification, 1963." (*TLE*) IV-2: 12-14. D63
- Sellnow, David. "Letting Students Grow Up". XLVI-3: 67. D05. (*TLE*).
- Singer, Gregg. "Why Evangelical Colleges Die." (*TLE*) III-2: 15-16. D62
- Sitz, Herbert. "DMLC's Golden Jubilee Celebration." (*LSB*) IV-3: 2. Ap34
- Sitz, Herbert. "Anniversary of G. Burk." (*LSB*) XIV-2: 4. D43
- Spurgin, Alan. "Attending a Professional Conference". XLVII-2: 38-39. D06. (*TLE*).
- Thiesfeldt, Steven. "Martin Luther College Strategic Plan: A Vision for Leadership: 2010+." XLVI-4: 118-125. M06. (*TLE*).
- Toppe, Carleton. "Curriculum Revision At Northwestern College." (*TLE*) II-2: 8-9. D61
- Trettin, Emil. "Will You Help." (*LSB*) XXVIII-2: 6-7. D57
- Wendler, David. "MLC-Yesterday, Today, Tomorrow". XLV-3: 70-73. F05. (*TLE*).
- Wessel, Howard. "Student-Teaching—a Brief Overview." (*TLE*) XVI-2: 11-12. D75
- Wessel, Howard. "Twenty-five Years of Cooperation." (*TLE*) XXIX-4: 91-94. My89
- Wessel, Howard. "An Appreciation of Classroom Supervisors." (*TLE*). XL-1: 12-13 O99
- Westendorf, S.E. "Commencement Address - DMLC." (*LSB*) XXIII-4: 1-2. My53

Ziesemer, Richard. "Part-time Agency for Collegiates, A." *(TLE)* XV-2: 19-20. D74

## Communication

- Baer, Eugene + Tech. "Communication: A Basic Skill." *(TLE)* XVIII-3: 14-16. F78
- Braun, John. "Communicate: An Interview with John Stellick." (LL) X:1 14-17 Fa01
- Carpenter, Craig. "Paybacks." (LP). VII-5: 16 May/June00
- Gerlach, Joel. "He Knows The Shepherd." *(TLE)* X-3: 2-3. F70
- Greenfield, Sandra. "Extending the Classroom." *(TLE)* XX-3: 16-17. F80
- Hering, John. "Communication Skills for Sharing Christ." (LL) XI-4: 20-21 Su03.
- Holman, Jams. "Listen to Me. I'm Talking to You." (PL) IV-2: 42-43 Sp96
- Hunter, Thomas. "Listen to This." (PL) IV-2: 24-25 Sp96
- Staab, William. "'M and M's' of Communication, The." *(TLE)* XXIV-3: 18-20. F84
- Tech, Norman + Baer. "Communication: A Basic Skill." *(TLE)* XVIII-3: 14-16. F78

## Competition

- Lequia, Joseph. "Winning or Participating (1)." *(TLE)* XXI-3: 8-10. F81
- Lequia, Joseph. "Winning or Participating (2)." *(TLE)* XXI-4: 8-9. My81
- Pelzl, David. "Cooperation or Singling Out?" *(TLE)* XXXV-1: 25 O94
- Petermann, Kurt. "Forcing Adulthood." *(TLE)* XXI-3: 22-24. F81

## Computers

- Aderman, James. "Video Game Bytes." (LP) III-2: 4. Nov/Dec 95
- Aderman, James. "Living Bold." (LL) X-3:20-21 Sp02
- Anonymous. "EduTech Announcement". XLVI-3: 76-77. F06. (TLE).
- Averbeck, Julia. "Do I Get to Work on the Computer Today?" *(TLE)* XXIV-1: 5-6. O83
- Averbeck, Julia. "Computers and Children With Special Learning Needs." *(TLE)* XXXII-1: 25-26. O91
- Borgwardt, Wayne. "Moving Forward with Technology." (LL) X-3:4-7 Sp02
- Braun, John. "Dream: An Interview with Gary Baumler." (LL) X-3:14-17 Sp02
- Cuppan, Bruce. "Accessible to All?" (LL). IX-3:26-27 Sp01
- Diener, Richard. "Attitudes: The Computer and Productivity for Educators." (PL) III-2: 32-33 Sp95
- Diener, Richard. "E-mail, a Valuable Tool." (PL) III-3: 37-38 Su95
- Ferch, Dawn "Computer Curriculum K-8." *(TLE)*XXXVI-

II-2:46-49 D97

- Fischer, Kenneth. "A Church Web Site?" (LL) X-3:18-19 Sp02
- Foelske, Wayne. "Integration of Computers in the Science Classroom." *(TLE)* XXIX-4: 82-90. My89
- Gosdeck, Kurt. "Get Smarter! ". XLVII-4: 112-119. M07. (TLE).
- Grabitske, Patricia. "A New Team on the Block—Teachers and Technology." *(TLE)* XXXVI-4: 122-124 M96
- Grunwald, James. "The Role of Computers in Education." *(TLE)* XXXI-1: 4-7. O91
- Grunwald, James. "How Has the Computer Changed Your Publications?" *(TLE)*. XLI-1: 6-9 O00
- Henrickson, James. "By All Means Possible WELS TECH 2001." *(TLE)*. XLI-3: 82-83 F01
- Henrickson, James. "Finding a Smaller World." (PL) IV-2: 26-27 Sp96
- Henrickson, James. "Integrating Technological Tools into Today's Classrooms." *(TLE)* XXXVI-1: 11-29 O95
- Klindworth, Robert & M Meyer. "Technology Opportunity—the Virtual School." (PL) IV-3: 22-23 Su96
- Koester,Robert. "Technology and Bible Study." (LL) X-3:22-23 Sp02
- Kuster, Thomas. "If I Could Get on the Internet..." (ELS) I-3:6 Su98
- Lindemann, Daron. "PC2: PC in a PC World." (LL) X-3:8-10 Sp02
- Meyer, Mark & R. Klindworth. "Technology Opportunity—the Virtual School." (PL) IV-3: 22-23 Su96
- Micheel, John. "Computer Literacy." *(TLE)* XXII-3: 2-4. F82
- Micheel, John. "Computer Resources." *(TLE)* XXIII-4: 10-12. My83
- Paulsen, Eric. "The Internet: World Wide Web in WELS Schools." *(TLE)* XXXVI-3: 71-78 F96
- Paulsen, John. "Computers in Christian Day School?" *(TLE)* XXIII-1: 15-17. O82
- Pelzl, David. "Calculators for the 1990s." *(TLE)* XXXI-2: 47-48. D90
- Potratz, Gail. "A Tool for School Improvement." (LL) X-3:24-25 Sp02
- Radtke, Nathan. "Godspeed." (PCE) I-3: 46. W89
- Ristow, Timothy. "Internet use in the Classroom." (ELS) V: 7-8 Sp99
- Schultz, Michael. "MIDI and ...." (LL) X-3:26-27 Sp02
- Sonnenberg, Gary L. "Use Your Apple Ile." *(TLE)* XXXI-II-2: 36-37. D92
- Smith, Kristen. "Careening Down the Information Highway." (LP) X-2: 6-8 Nov/Dec02.
- Smith, Kristen. "Bridge the Gap." (LP) X-5: 6-8 My/Ju 03.
- Wendt, Michael. "How to Web the Right Way". XLVI-3: 70-76. F06. (TLE)
- Zank, Joel. "The Millennium Bug." (LP). VI-6:15 Ju/Au99

## Confirmation

- Aderman, James. "Don't Rob Them of the Privilege." (*PCE*) I-2: 22-23. Fa89
- Ahlswede, Eugene. "Parent-Pastor Consultation." (*TLE*) XXVI-1: 7-8. O85
- Albrecht, Martin. "Home and the Confirmation Class, The." (*TLE*) VI-4: 13-15. My66
- Eckert, Paul. "Part-Time Could's and Should's." (*TLE*) XIV-1: 20-22. O73
- Fischer, William. "How Effective is Our Teaching of the Confirmation Class?" (*TLE*) VIII-2: 11-13. D67
- Fredrich, Edward. "Growing Trees: A Two-Year Lutheran Confirmation Course." (*TLE*) XIII-4: 21-22. My73
- Hartmann, Robert. "Confirmation: Let's Make it Meaningful (1)." (*TLE*) XVII-3: 7-9. F77
- Hartmann, Robert. "Confirmation: Let's Make it Meaningful (2)." (*TLE*) XVII-4: 4-5. My77
- Hochmuth, Robert. "Confirmation Class: Who's to be the Teacher?" (*PCE*) II-1: 14-15. Su90
- Janke, Martin. "Let's Put Away the Crayons!." (*TLE*) VII-2: 16-18. D66
- Janke, Philip. "Take Another Look at 'Confirmation' in Your Church." (*TLE*) VIII-1: 10-12. O67
- Jeske, Mark. "Some Notes on Adult Instruction and Confirmation." (*TLE*) XXIV-2: 2-5. D83
- Kastens, Gerald. "Confirmation Instruction—Smooth Sailing or Foundering?" (*TLE*) XLII-3:82-84 F01
- Lauersdorf, Richard. "When Is a Person Confirmed?" (*PCE*) II-3: 44-45. Wi90
- Lopahs, Martin. "This is the Year My Johnny Gets Confirmed." (*TLE*) XXX-3: 69-71. F90
- Petermann, Kurt. "Stuck in Tradition." (*TLE*) XXVII-2: 5-7. D86
- Prange, Paul. "Christian Family Confirmation." (*PL*) II-1: 30-31 Fa93
- Raddatz, Darwin. "Evangelism Library from San Jose: An Integrated Program on." (*TLE*) XXIV-3: 12-14. F84
- Westendorf, Thomas. "More Than a Church Member: Training Confirmands to Be Disciples." (*TLE*) XXX-4: 81-86. My90
- Westendorf, W. W. "Post-Confirmation Instruction." (*TLE*) III-3: 15-16. F63

## Congregation

- Ahlswede, Eugene. "Co-operation." (*TLE*) XXII-2: 2-4. D81
- Anonymous. "Cooperation and Order." (*TLE*) II-3: 21. F62
- Anonymous. "Synodical Resolutions Pertaining to Parish Education." (*TLE*) XII-1: 23. O71
- Bakken, Debra. "The Congregation and the Child." (*PCE*) III-2: 22-23. Fa91
- Becker, Bruce. "Change the Pace." (*LL*) X-2: 24-25 Wi02
- Becker, Bruce. "It Isn't Always Either/Or." (*LL*) IX-4:18-19 Su01
- Borchardt, Paul. "Church Camping." (*TLE*) III-4: 15-17. My63
- Braun, Mark. "Is Waterskiing a Means of Grace?" (*TLE*) XXI-4: 5-7. My81
- Braun, John. "Leadership-Lutheran Style." (*LL*) VII-2: 26-27 Wi99
- Braun, John. "Move Forward-An Interview with Jerry Murphy." (*LL*)VI-6:14-17 Wi98
- Braun, John. "We Have a Future!: An Interview with Robert Johannes." (*LL*). VIII-4: 14-17 Su2000
- Brunner, Mark. "Building Your Church Archives (1)." (*PL*) II-2: 30-31, 35 Sp94
- Brunner, Mark. "Building Your Church Archives (2)." (*PL*) II-3: 49-50 Su94
- Bunnow, David. "Television, Video, and the Local Congregation." (*TLE*) XXIV-3: 10-11. F84
- Busler, Brian. "Serve More." (*PL*) I-2: 22-23 Sp93
- Duncan, Michael. "How We Reorganized." (*LL*) IX-4:8-10 Su01
- Eggert, Kurt. "Using Hymns in Your Societies." (*TLE*) I-4: 15-17. D61
- Eich, John. "Council Consistency Amid Turnover." (*PL*) IV-1: 18-20 Fa95
- Eisenmann, Judith and John Wiederhold. "Recruiting Volunteers and Loving It!" (*LL*) VII-2: 18-19 Wi99
- Esmeier, Jim. "Advocates of God's Family." (*LL*) VII-1: 22-23 Fa98
- Fellers, Debera. "New Direction for Women's Groups." (*PL*) II-3: 19,25 Su94
- Fischer, Gervasius. "The Consolidated Elementary School." (*LSB*) XVII-3: 1-2. F47
- Gentz, Grant. "An Effective Board." (*LL*) VII-2: 4-7 Wi99
- Gerlach, Joel. "Placard Parades and Assured Savings." (*TLE*) IX-2: 2-3. D68
- Gerlach, Joel. "Turn Up the Thermostat, Please!" (*TLE*) XIII-4: 2-3. My73
- Hartman, Robert. "Which Size are You?" (*LL*). VIII-4: 18-19 Su2000
- Heins, Ronald. "Ten Ideas on Change." (*LL*)VI-3:4-7 Sp98
- Heins, Ronald. "To Save Some." (*LL*) XI-3: 4-7 Sp03.
- Heins, Ronald. "Adapt-Don't Change." (*LL*)VI-3:28-29 Sp98
- Heins, Ron. "God's Love is Always Concrete". XIII-2: 4-7 Wi05. (*LL*).
- Isch, John R. "The Best Congregation in Synod." (*TLE*) XXXIII-1: 3. O92
- Isch, John. "Of Franzmann, WELS and the US Census." (*TLE*) XLII-3:88-90 F01
- Isch, John. "In Praise of the Consistently Competent." (*TLE*). XL-3: 67 F00
- Jeske, Mark. "Using the Hymnal as a Teaching Tool." (*TLE*) XXIII-4: 15-18. My83
- Kastens, Gerald. "You Haven't Changed a Bit." (*LL*) X-2: 4-7 Wi 2002
- Kelm, Paul. "Smaller Churches? ". XIII-2 8-10 Wi05. (*LL*).
- Kelm, Paul. "Generations." (*LL*) VI-4: 4-8 Su98
- Kelm, Paul. "Four Principles." (*LL*) IX-4:4-7 Su01
- Knapp, Ken. "Enough Evidence?" (*LL*) X:1 24-25 Fa01

- Knippel, Robert. "Surviving a Midlife Crisis." (LL) XII-3: 8-10 Sp04.
- Koepsell, Markus. "Making Our Societies Effective Part-Time Agencies." (TLE) XI-3: 20-22. F71
- Kovaciny, Roger. "Start a Tape Ministry for \$150." (TLE) XXII-2: 7-10. D81
- Krueger, Robert. "Shaking Hands." (LL). VIII-4: 24-25 Su00
- Malnes, Dave. "Small-Parish Youth Ministry." (LL). VIII-4: 28-29 Su00
- Melso, John. "Assimilation: A Key to Locking the Back Door." (PL) II-3: 26 Su94
- Meyer, F.W. "What Shall I Say?" (LSB) XVIII-4: 3-4. My48
- Michael, James. "A Church Organization With a Purpose." (TLE) I-3: 19. F61
- Mueller, Wayne. "Family Ministry: Running in Place." (PL) IV-1: 16-17 Fa95
- Mueller, Wayne. "Leadership: Risk." (LL) VII-2: 32 Wi99
- Myers, Dan. "Be a David!" (LL). VIII-4: 8-10 Su00
- Ninman, Nancy. "Lessons From a Friend." (LP) XI-6: 4-5 July/Aug04.
- Nolting, Paul. "Our Parochial School Teachers." (LSB) XIII-4: 5. My43
- Parlow, John. "Be Lutheran." (LL) VI-6: 8-10 Su98
- Paustian, Mark. "Small is Good." (LL). VIII-4: 4-7 Su00
- Pfeifer, Michael. "Avoiding Pearl Harbor." (LL) IX-4: 22-23 Su01
- Prillwitz, David. "Worship in Small Parishes." (LL). VIII-4: 20-21 Su00
- Raabe, Peg. "Involved and Busy." (LL) XI-2: 20-21 Wi03.
- Radloff, James. "A Mission-Driven Church." (LL). VII-4: 8-10 Su99
- Satorius, Carl and Miriam. "Singing in the Choir." (LL) VII-2: 20-21 Wi99
- Schafer, Stephen F. "Funding the Parish School." (TLE) XXXIII-1: 4-11. O92
- Sorgatz, Edwin. "Christian Teacher and His Congregation." (TLE) IV-4: 4-6. My64
- Spaude, Phil. "More With Less." (LL). VIII-4: 26-27 Su2000
- Voss, Robert. "The Church Meeting, Its Challenge." (TLE) V-4: 14-16. My65
- Warnke, Harold. "Unsung Hero." (TLE) V-3: 8-10. F65
- Wasser, Craig. "One Thing at a Time." (LL). VIII-4: 22-23 Su 2000
- Westendorf, Rolfe. "Camping With Christ at Killarney." (TLE) V-3: 11-12. F65
- Westra, Charles. "Plan to Share." (LL). VII-4: 4-7 Su99
- Wiessinger, Randy. "Encourage the Inactive." (LL) VII-1: 18-19 Fa 98
- Wilkes, Michael. "Love People—Manage Activity." (PL) IV-1: 21-22 Fa95
- Wilson, Julie & Bruce Becker. "A Generation in Need of Jesus." (LL) VI-6: 20-21 Su98
- Woldt, Al. "Tracking Mobile Members." (PL) I-2: 31 Sp93
- Woltmann, William. "Children's Participation in Congregational Activities." (TLE) XI-4: 12-13. My71

## Continuing Education

- Owens, Sarah. "Never Not a Student." (LL) XI-4: 24-25 Su03.

## Counseling

- Bergholz, Hoge. "Guidance in Our High Schools." (TLE) VI-1: 13-15. O65
- Bondow, Susan. "Starving for Perfection." (LP) III-4: 12-13. Mar/Apr 96
- Borgwardt, Wayne. "Boost Up and Out: Placement Services in an Area Lutheran HS." (TLE) XIII-4: 16-18. My73
- Cook, John. "Drinking? Not My Child." (LP) III-2: 11,15. Nov/Dec 95
- Gorske, Ronald. "Called to Counsel." (TLE) XVI-2: 16-18. D75
- Gulczynski, D. Dennis. "Youth Leaders as First-Level Counselors." (PL) IV-2: 41 Sp96
- Loe, Daniel. "The Lutheran Teacher Helps Families." (TLE). XLI-3: 80-81 F01
- Lyon, H. Curtis. "What Kind of Counseling Was That Again?" (PL) II-3: 47-48 Su94
- Nelson, Jason. "Confidentiality in Youth Ministry." (PL) IV-3: 15-16 Su96
- Nelson, Jason. "The Christian Teacher is a First-Level Counselor." (TLE) XXIX-1: 4-6. O88
- Nelson, Jason. "Challenges in Counseling High School Youth." (TLE) XXXII-4: 127-128. My92
- Petermann, Kurt. "Career Exposure." (TLE) XXI-1: 12-13. O80
- Reed, Linda. "The Lies We Believe." (LP) XI-2: 4-5 Nov/Dec 03.
- Strohm, Philip. "Christian Guidance Keynotes Individual Development." (TLE) IX-4: 2-4. My69
- Voss, Verne. "I Don't Know Where to Turn Anymore." (LP) XI-3: 6-8 Jan/Feb04.
- Willems, Paul. "Opening Doors." (TLE) XXVI-3: 16-18. F86

## Creation Science

- Adickes, Robert. "Creation Science Field Trip to the Grand Canyon, A." (TLE) XVI-3: 22-24. F76
- Boehlke, Paul. "Nature of Science: Implications for Creationists, The." (TLE) XVIII-4: 8-10. My78
- Boehlke, Paul. "Here Come the Dinosaurs." (LP)V-1: 6-8 Sep/Oct 1997
- Golisch, David. "Lutheran Science Institute." (TLE) XV-4: 17-19. My75
- Isch, John. "Keep Religion in Its Place." (TLE) XLIII-1: 3 O02.
- Martin, G. "Theories of Science in the Light of Scripture (1)." (LSB) XVII-3: 6-7. F47
- Martin, G. "Theories of Science in the Light of Scripture

- (2).” (*LSB*) XVII-4: 3-6. My47  
 Schaller, Loren. “Pollution.” (*TLE*) XI-1: 13-15. O70  
 Schnitker, Heine. “Physical Sciences, The.” (*TLE*) XII-3: 10. F72  
 Sponholz, Martin. “Naturalist and the Scientist, The.” (*TLE*) XVIII-4: 10-12. My78

## Creativity

- Czer, Ramona. “Created Creative.” (*TLE*) XXXVII-2: 57-59 D96  
 Meyer, Marietta. “Creativity and Self Expression.” (*TLE*) VII-2: 4-5. D66  
 Ring, Lester. “Creativity.” (*TLE*) I-2: 5-7. D60

## Curriculum

- Anonymous. “The Curriculum in Religion.” (*TLE*) II-1: 21. O61  
 Anonymous. “The New Sunday School Course.” (*TLE*) V-2: 19-20. D64  
 Anonymous. “A Curriculum Guide for Lutheran Elementary Schools.” (*TLE*) V-3: 13-15. F65  
 Anonymous. “Concordia Catechism Series.” (*TLE*) VIII-3: 15-16. F68  
 Anonymous. “Remember Your Umbrella: A review of Religious Materials for Children.” (*LP*). VIII-3:10-11 Jan/Feb01  
 Averbeck, Robert. “DBAE—What is It?” (*TLE*) XXVII-2: 10-13. D86  
 Averbeck, Robert. “Developing a DBAE Curriculum.” (*TLE*) XXVII-3: 3-8. F87  
 Bauer, Gerhard. “Observing the Reformation in Our Schools.” (*TLE*) II-4: 8-9. My62  
 Burow, Sharon. “Integrating God’s Word Throughout the Curriculum and Into the Home.” (*TLE*) XXXVII-1: 23-27 O96  
 CPS. “CLIP Will Introduce You.” (*PL*) IV-2: 30 Sp96  
 Dorn, Owen. “Total Curriculum, The.” (*TLE*) XIX-3: 15-16. F79  
 Eckert, Paul. “Concordia Sex Education Series, The.” (*TLE*) X-3: 22-24. F70  
 Eggert, Arthur. “Lutheran Cultures and the German Language: A Curriculum for .” (*TLE*) XXXV-2: 54-57 D94  
 Fehlauer, Adolph. “Curriculum Studies.” (*TLE*) X-1: 22. O69  
 Ferch, Dawn. “Computer Curriculum K-8” (*TLE*)XXXVI-II-2:46-49 D97  
 Fischer, William. “Publications for the Part-Time Agencies in the Church.” (*TLE*) XII-4: 18-21 My72  
 Frey, Conrad. “Curriculum Study and the Preparation of Course Syllabi.” (*TLE*) VI-3: 10-11. F66  
 Frick, Carol. “Alpha People Bring Fun to Phonics.” (*TLE*) XIII-4: 10-11. My73

- Gieschen, Paul. “The School and Its Missionary Character.” (*LSB*) VIII-4: 1-3. My38  
 Glende, Arthur. “A School Visitor’s Gleanings (1).” (*LSB*) XXII-2: 7-8. D51  
 Glende, Arthur. “A School Visitor’s Gleanings (2).” (*LSB*) XXII-3: 6-7. F52  
 Glende, Arthur. “A School Visitor’s Gleanings (3).” (*LSB*) XXII-4: 8-9. My52  
 Heidtke, Earl. “Bringing a Global View to the Classroom.” (*TLE*)XXXVIII-3:68-71 F98  
 Heine, Beverly. “Views on Curriculum Study.” (*TLE*) XIII-1: 6-7. O72  
 Isch, John. “Mastery Learning.” (*TLE*) XVIII-3: 20-22. F78  
 Isch, John. “On the Selection of Textbooks.” (*TLE*) XXVI-II-4: 89-92. My88  
 Isch, John. “Shopping in the World’s Marketplace.” (*TLE*) XXXI-3: 58-62. F91  
 Janke, Philip. “Church’s Curriculum Centers on Christ, The.” (*TLE*) VI-1: 16-18. O65  
 Kastens, Gerald. “The Coordinated Religion Curriculum—Checking the Course.” (*TLE*) XXXIII-4: 121-122. My93  
 Kastens, Gerald. “Christ-Light: A Beacon for Children and Families.” (*LL*)VI-2:4-7 Wi98  
 Kissinger, Mrs. Donald. “St. John’s First Graders Learned to Read Via i/t/a.” (*TLE*) VII-1: 13-15. O66  
 Kowalke, E.E. “Christian Education.” (*LSB*) X-4: 1-2. My40  
 Kriewall, Thomas. “The Sum and Substance of Arithmetic.” (*TLE*) I-3: 6-8. F61  
 Kuske, David. “The Religion Curriculum Project: What are its Goals?” (*PCE*) III-3: 42-43. Wi91  
 Loppnow, L. S. Collyard. “Sex Education—Whose Responsibility?” (*LP*). VIII-3:15 Jan/Feb01  
 Martens, Gene. “Contemporary Music in the Classroom.” (*TLE*) XXXV-4: 113-117 My95  
 Meyer, Edward & Wayne Wagner. “The New WELS Elementary School Music Curriculum.” (*TLE*) XXXIII-1: 26-32. O92  
 Mose, Jane. “Parents and Christ-Light.” (*LL*)VI-2:8-10 Wi98  
 Moskop, A.A. “Safety Education.” (*TLE*) I-1: 8-9. O60  
 Nelson, Joel. “Revitalizing Your Sunday School Curriculum.” (*PCE*) III-3: 36-37. Wi91  
 Pankow, Gerald. “Help the Disadvantaged Majority.” (*TLE*) X-4: 8-9. My70  
 Paulsen, John. “Metric System is Coming, The.” (*TLE*) XVI-3: 14-16. F76  
 Petermann, James. “Back to the Basics.” (*TLE*) XXIV-2: 10-12. D83  
 Schroeder, Martin. “Not...first...,Nor...last....” (*TLE*) XXXIV-3: 67. F94  
 Schultz, F. W. “Child and the Curriculum of the School, The.” (*TLE*) IX-3: 9-10. F69  
 Schultz, John. “Becoming Involved in Curriculum Study.” (*TLE*) XI-4: 7-9. My71  
 Schultz, John. “Planning for Individualized Learning.”

- (*TLE*) XIV-4: 15-16. My74
- Schultz, John. "Recognizing Individualized Curricula." (*TLE*) XV-1: 15-17. O74
- Schulz, Arthur. "Experimental Programs and the Curriculum." (*TLE*) IV-1: 8-9. O63
- Schulz, Arthur. "In Pursuit of Excellence." (*TLE*) IV-3: 7-9. F64
- Schulz, Arthur. "The Christian Teacher and the Curriculum." (*TLE*) IV-4: 15-16. My64
- Sitz, Carleton. "Initial Teaching Alphabet." (*TLE*) VI-1: 10-12. O65
- Sitz, Carleton. "i/t/a Project in St. John's School, The." (*TLE*) VII-1: 11-12. O66
- Sitz, Herbert. "A New Course of Study for Minnesota Schools." (*LSB*) IV-1: 3-4. O33
- Staab, William + Stueber. "Educational Alternatives." (*TLE*) XXII-1: 12-15. O81
- Steinbrenner, Dennis. "Skill- and Content-Based Social Studies Curriculum, A." (*TLE*) XIX-4: 17-20. My79
- Stindt, A.C. "The Daily Program." (*LSB*) II-1: 7. S31
- Stindt, A.C. "The Daily Program." (*LSB*) II-2: 2. N31
- Stindt, A.C. "A Suggested Program." (*LSB*) IV-1: 6. O33
- Stindt, A.C. "Time Allotment and Order of Subjects in the Daily Program." (*LSB*) VIII-1: 5. S37
- Stueber, James + Staab. "Educational Alternatives." (*TLE*) XXII-1: 12-15. O81
- Toppe, Carleton. "Curriculum Revision At Northwestern College." (*TLE*) II-2: 8-9. D61
- Wagner, Wayne. "Music in our Churches and Schools: The Perspective of Tradition." (*TLE*) XXXV-4: 118-125. My95
- Wagner, Wayne & Edward Meyer. "The New WELS Elementary School Music Curriculum." (*TLE*) XXXIII-1: 26-32. O92
- Warnke, Harold. "A Survey of Lutheran High School Religion Courses." (*TLE*) I-1: 9-10. O60
- Wessel, Howard. "Objectives-Functional Guide or Vague Generality." (*TLE*) IX-2: 8-9. D68
- Woldt, Alfons. "Curriculum—Who's Responsible?" (*TLE*) III-4: 10-11. My63
- Zahn, Meilahn. "Plea for a Program, A." (*TLE*) IX-2: 14-16. D68
- Zahn, Meilahn. "Music—or Just a Song?" (*TLE*) IX-3: 17-19. F69
- Zahn, Meilahn. "Why the Great Neglect?" (*TLE*) V-2: 16-18. D64

## Development

- Arndt, Emanuel. "What is New in Professional Books." (*LSB*) XX-2: 2-3. D49
- Arndt, Emanuel. "What is New in Professional Books?" (*LSB*) XX-4: 3-4. My50
- Averbeck, Robert. "Development of Visual Symbolization, The." (*TLE*) XVIII-2: 13-14. D77

- Bauer, Jackie. "The back-to-bedtime blues." (*LP*) IV-6:9. July/August 1997
- Carpenter, Craig. "The Feeding Frenzy Phase." (*LP*) IV-6:16. July/Aug 1997
- Czer, Ramona. "High Drama in the Upper Grades." (*TLE*) XXXV-3: 80-82. F95
- Gerlach, Joel. "Total Child Control—Again." (*TLE*) XIII-1: 2-3. O72
- Haar, Beverlee. "Where Do I Begin?" (*TLE*) XXXV-3: 89-90. F95
- Juern, John. "Obedience and the Heart." (*LP*) III-1: 14. Sep/Oct 95
- Juern, John. "Responsibility and Kids." (*LP*) III-2: 5. Nov/Dec 95
- Juern, John. "Trust and the Parent/Child Relationship." (*LP*) III-3: 5. Jan/Feb 96
- Juern, John. "Honesty Doesn't Come Naturally." (*LP*) III-5: 5. May/June 96
- Juern, John. "The Compulsive Liar." (*LP*) III-6: 4. July/Aug 96
- Juern, John. "You do the Crime—You do the Time." (*LP*) VI-2: 4. Nov/Dec98
- Juern, John. "Home Help for Parents." (*LP*) VI-1: 4. Sep/Oct98
- Juern, John. "Lying--A Natural Response." (*LP*). VIII-1: 5. Sep/Oct00
- Juern, John. "Neuroscience: It's not just for brain surgeons anymore." (*LP*). VIII-6: 5. July/Aug01
- Juern, John. "Please, Mommy, Don't Go." (*LP*). VIII-5: 7. May/Jun01
- Juern, John. "Ready, Sit, Go!" (*LP*). VII-2: 4. Nov/Dec 99
- Juern, John. "Teach God's Love--even in times of loss." (*LP*). VI-6: 4. Ju/Au99
- Juern, John. "The Bed-Wetting Nightmare." (*LP*). VII-3: 5. Jan/Feb00
- Juern, John. "Stop Yelling." (*LP*) X-2: 23. Nov/Dec02.
- Juern, John. "The Challenges of Change." (*LP*) XI-6: 23. July/Aug04.
- Juern, John. "Anger Management for Kids." (*LP*) X-5: 23. My/Ju 03.
- Kuske, Lynn. "The Invisible Friend." (*LP*). VIII-3:14. Jan/Feb01
- Lemke, Carol. "When God Smiles." (*LP*) IX-3: 8-9. Jan/Feb 02
- Loomis, Cheryl. "The Developing Brain." (*TLE*) XXXVIII-4:103-106. My98
- Loomis, Cheryl. "MI: What Does it Mean to Our Children?" (*LP*) IX-6:12-13. July/Aug02
- Madson, Margaret. "The Place of Play." (*TLE*) XXIII-1: 20-21. O82
- Magiera, Corrine. "Let the Adventure Begin." (*LP*). VI-6: 5-6. Ju/Au99
- Meyer, Edward. "Critical Periods in the Musical Development of Children." (*TLE*) XVIII-1: 17-19. O77
- Mischke, Joe. "What Do You Want to be When You Grow

- Up?" (LP)V-1:12-13 Sep/Oct 1997
- Polzin, Barbara. "Of Wormholes, Dirt Cake, and Other Valuable Stuff." (LP). VIII-5: 10-11 May/Jun01
- Rendahl, Freida. "When Math Doesn't Add Up." (LP)V-2:1-2 Nov/Dec 1997
- Schuetze, Victoria. "Timmy Begins School." (TLE) V-1: 4-5. O64
- Schuetze, Victoria. "Stimulating the Young Child." (TLE) VI-1: 6-7. O65
- Sievert, Hertha. "The Miracle of Speech." (TLE) IV-3: 4. F64
- Sitz, Herbert. "There are Books on the Subject." (TLE) VIII-4: 21. My68
- Snamiska, Paul. "The Perfect Match." (LP) XI-4: 28-29 Mar/Apr04.
- Starr, Laurie. "The Pain of Postpartum." (LP). VI-6: 7-8 Ju/Au99
- Woldt, Michael. "Question and Answer." (LP)V-1:15 Sep/Oct 1997
- Woldt, Michael. "Question and Answer." (LP)V-3:15 Jan/Feb 1998
- Woldt, Michael. "Question and Answer." (LP)V-4:13 Mar/April 1998

## Developmentally Challenged

- Cook, Jorita. "The Old Rugged Cross." (LL) VII-2: 28-29 Wi99
- Covach, John. "Jesse's Story." (LL). IX-2:28-29 Win01
- Cuppan, Bruce. "That All May Serve." (PL) III-3: 39-40 Su95
- Cuppan, Bruce. "Summer and Special People." (LL) X-2: 22-23 Wi02
- Esmeier, Jim. "Jesus Cares, but Do Others?" (PL) III-3: 41-42 Su95
- Hochmuth, Robert. "Richard: Confirming the Retarded." (PCE) III-1: 3-4. Su91
- Janke, Mary. "Helping the Retarded Child." (TLE) IX-4: 18-19. My69
- Luetke, Julie. "His Little Lambs Were All Smiles." (PL) II-3: 45-46 Su94
- Martin, Kelly. "Chris and Me." (LP) IX-4: 4-6 Ma/Ap 02
- Robbert, Lee. "Jesus Cares Ministry." (LL)VI-2:26-27 Wi98
- Robbert, Lee. "Hi! I'm Jimmy." (LL). VIII-3: 24-25 Sp00
- Schulz, James. "Easier Than You Think." (LP). VII-4:6-8 Mar/Apr00
- Voss, Carol. "Teaching the Word of God to Retarded Persons." (PCE) I-1: 12-13. Su89
- Winter, Louis. "Mentally Retarded, The." (TLE) IX-4: 10-17. My69
- Woldt, Al. "Barriers—Imaginary or Real?" (PL) III-3: 44-45 Su95
- Woldt, Alfons. "How Shall We Train Our Retarded Child?" (TLE) XIV-4: 11-12. My74
- Zimmermann, Mardy. "A Very Special Ministry." (LL) VII-2: 24-25 Wi99

## Devotions

- Anonymous. "Thank God for the PGA." (ELS). VII:1,5 Sp/Su 2000
- Beckmann, Laurel. "Some Ideas for Your Devotions." (TLE) XXVI-4: 12-14. My86
- Buelow, Ronald. "Matins in the Classroom." (TLE) XII-2: 12-14. D71
- Ehlke, Lorna. "Spoonfuls of Scripture." (TLE) XXI-1: 8-9. O80
- Gerlach, Joel. "Let us Pray!" (TLE) XIII-2: 2-4. D72
- Grunze, Richard. "Devotions in Our Schools." (TLE) XVIII-3: 8-9. F78
- Helwig, Donald. "Devotions Written and Led by Children." (TLE) XVIII-1: 12-13. O77
- Keibel, Armin. "Luther's Wedding Ring." (TLE) V-3: 1. F65
- Koelpin, Arnold. "The Christian Teacher's Understanding of Prayer." (TLE) XXVIII-1: 5-9. O87
- Kremer, Kenneth. "Wellspring: A New Resource for the Spiritual Home." (PL) I-2: 48-49 Sp93
- Kremer, Kenneth. "Consider Weekly Services for the Children." (PL) III-3: 32 Su95
- Kremer, Kenneth. "Home Worship." (LL) VII-1 26-27 Fa98
- Kremer, Kenneth. "How to Build a Family Altar." (LP) III-5: 15. May/June 96
- Luehring, William. "Purposeful Devotions." (LSB) XXIX-2: 1-3. D58
- Petermann, Kurt. "Family Devotions - The Tie That Binds." (TLE) XXII-1: 10-12. O81
- Pfeifer, Gene. "Getting Students to Express Their Faith Through Devotions." (TLE) XXXVI-2: 48-51 D95
- Pfotenhauer, Thomas. "Family Altar, The—Let's Revive It." (TLE) XV-3: 2-3. F75
- Schultz, Anthony. "You Can Tell the Little Children." (PL) I-1: 37-38. N92
- Schultz, Dennis. "Take Seven!" (TLE) XXVI-3: 12-14. F86
- Schultz, Dennis. "With Devotion and a Willing Mind." (TLE) XXVII-1: 5-8. O86
- Schultz, John. "Light on the Path in a Dark World." (TLE) XLIII-1: 4 O02.
- Schultz, John. "Assurance of Victory." (TLE) XLIII-2: 36 D02.
- Schultz, John. "You are a Deep Concern to Jesus." (TLE) XLIII-3: 68 F03.
- Schultz, John. "Encouragement for Those Who Feel Overwhelmed." (TLE) XLIII-3: 100-101 My03.
- Schultz, John. "Teachers Need Christmas Peace". XLIV-2: 36-37. D03. (TLE).
- Schultz, John. "Christian Joy Produces Prayer". XLIV-4: 100-101, M04. (TLE).
- Schultz, John. "Christian School Discipline". XLVII-3: 68-69. F07. (TLE).
- Schultz, John. "Joy in Remembrance". XLVII-4: 100-101. M07. (TLE).
- Schultz, John. "A Friend in High Places". XLV-1:4-5 O04.

- (TLE).
- Schultz, John. "Rejoice! The Lord Is Near". XLV-2: 36-37. D04. (TLE).
- Schultz, John. " "Don't Laugh Until Christmas" ". XLV-3: 68-69. F05. (TLE).
- Schultz, John. "The Living Hope of Heaven". XLV-4: 100-101. M05. (TLE).
- Schultz, John. "The Extra Mile". XLVI-1: 4-5. O05. (TLE).
- Schultz, John. "Excel in Godliness". XLVI-3: 68-69. F06. (TLE).
- Schultz, John. "Overcoming Weariness". XLVI-4: 100-101. M06. (TLE).
- Schultz, John. "The Christian's Real War". XLVII-1: 4-5. O06. (TLE).
- Schultz, John. "No Vacancy". XLVII-2: 36-37. D06. (TLE).
- Schultz, John. Helping Teachers Stress Reconciliation". XL-1:4-6. O03. (TLE).
- Stelter, Edward. "Leading the Children into the Bible through the Morning Devo." (TLE) XVIII-3: 10-11. F78
- Woldt, Michael. "Question and Answer." (LP) III-4: 10. Mar/Apr 96

## Discipline

- Aderman, James. "Self-Talk About Drug-Talk." (LP) VI-4: 5f March/April99
- Ahlswede, Eugene. "Apple and the Rod, The." (TLE) XXIII-2: 4-5. D82
- Albrecht, Michael. "A Christian Philosophy of Discipline." (TLE) XXVIII-1: 3-4. O87
- Albrecht, R.M. "What Can the Teacher Do .... Indifferent Attitude .... School." (LSB) XVIII-2: 3-5. D47
- Arndt, Ruth. "Teaching God's Little Ones." (TLE) VIII-4: 4-5. My68
- Arndt, Ruth. "Disciplining Jesus' Little Lambs." (TLE) XIII-4: 8-9. My73
- Arndt, Ruth. "Who Am I?" (TLE) XV-2: 9-10. D74
- Bauer, Jackie. "Discipling Someone Else's Child." (LP)V-3:9 Jan/Feb 1998
- Bilitz, Rose. "Classroom Conflicts=Teachable Moments." (TLE) XXXVI-3: 68-70 F96
- Brenner, John. "The Crisis of Disrespect." (LP). VIII-4: 6-8 Mar/Apr01
- Carpenter, Craig. "The Question." (LP) VI-4: 16 March/April99
- Cook, John. "With Your Eyes Open." (LP) VI-4: 14-15 March/April99
- Dusseau, Ray. "Discipline: Take Ten From Glasser." (TLE) XX-4: 15-17. My80
- Evenson-Reed, Linda "Why Can't I Wear Socks to Bed?" (LP)V-4:4-6 Mar/April 1998
- Fischer, Wayne. "Discipline and the Special Needs Child." (TLE) XXXIV-4: 100-103 My94
- Gerlach, Joel. "No Smooth Crosses, Please." (TLE) VIII-3: 2-3. F68
- Greenfield, Sandra. "Tales of Tattling and Blaming." (TLE) XXV-3: 9-11. F85
- Grunze, Richard. "Moses Struck a Rock." (TLE) XXV-2: 2-5. D84
- Gulczynski, Dennis. "The Anatomy of a Hissy Fit." (LP). VIII-4: 12-13 Mar/Apr01
- Hagedorn, Grace. "Tattletale." (TLE) XIX-4: 10-11. My79
- Heine, C.F. "The Dignity of the Child." (LSB) XII-1: 1-3. S41
- Hochmuth, Robert. "Beyond Good Discipline." (TLE) XVIII-1: 2-4. O77
- Huebner, Lloyd. "Classroom Atmosphere." (TLE) VIII-2: 8-10. C67
- Humann, Mrs. E. "How to Make and Keep a Classroom Attractive." (TLE) XVII-4: 11-13. My77
- Juern, John. "A Word on Behalf of Spankings." (LP) III-4: 6. Mar/Apr 96
- Juern, John. "Time-outs Promote Instruction." (LP)V-4:6 Mar/April 1998
- Juern, John. "Teach Them to Say No." (LP) VI-4: 4 March/April99
- Juern, John. "Christian Discipline is ..." (LP). VIII-4: 5 Mar/Apr01
- Juern, John. "Spanking." (LP) XI-1: 23 Sep/Oct 03.
- Jung, George. "The Place of Love in Discipline." (TLE) III-2: 22. D62
- Kastens, Gerald. "Stop Fighting." (LP). VIII-5: 12-13 May/Jun01
- Koepsell, G.A. "Discipline in the Classroom." (LSB) XV-3: 1-3. F45
- Kremer, Kenneth. "Exploding Myths Regarding Parental Discipline." (TLE) XXIX-4: 79-81. My89
- Krueger, William. "The Use of God's Word in Discipline." (LSB) XXVIII-1: 2-5. O57
- Loeck, Joyce. "Teaching Faith in Action." (TLE) XXXIV-2: 57-61 D93
- Loomis, Cheryl. "School Bullying." (TLE) XLIII-2: 41-43 D02.
- Loomis, Cheryl. "Encouraging Behaviors". XLVII-4: 99. M07. (TLE).
- Martens, Gene. "Disciplining Without Shame: Discipling Without Shame." (TLE) XXXIX-3: 68-76 F99
- Martens, Gene. "Shame on You!" (LP). VII-5: 10-11 May/June00
- Moskop, A.A. "House Rules." (TLE) II-2: 6-7. D61
- Nelson, Jason. "When You Turn Out the Lights, Is the Party Over?" (LP) VI-4: 6-7 March/April99
- Ninman, Nancy. "A Broken Trust." (LP) VI-4: 12-13 March/April99
- Sawatske, Laurie. "Keeping Good Order in the Sunday School Classroom." (PCE) III-3: 44-45. W91
- Schlueter, Viola. "How I Did It (1)." (LSB) XXI-2: 6-7. D50
- Schmeling, Daniel. "The Garden of Eden: A Model for

- Classroom Discipline." (*TLE*) XXII-2: 5-7. D81
- Schuetze, Victoria. "Stimulating the Young Child." (*TLE*) VI-1: 6-7. O65
- Schultz, Dennis. "Antidiseestablishmentarianism—by Coincidence." (*TLE*) XXVI-2: 15-16. D85
- Schulz, Arthur. "Maintaining Classroom Discipline." (*LSB*) XXVII-1: 4-6. O56
- Stoekli, Winfred. "Training Children to Apply Christian Principles in Social Life." (*LSB*) XXIV-1: 12-14. O53
- Wasser, Robert and Bonnie. "The Devil is Prowling." (*ELS*) VI-4: 10-11 March/April99
- Westendorf, Rolfe. "Physical Discipline in Christian Schools." (*TLE*) XXII-3: 13-15. F82
- Zehms, Roger. "Discipline in the Sunday School Classroom." (*TLE*) XXVII-2: 15-18. D86

## Doctrine

- Aderman, James. "Spell it Baptism." (*LP*)V-5:5 May/June 1998
- Ahlswede, Eugene. "Let's Not Be Impatient." (*TLE*) XXV-4: 10-12. My85
- Anonymous. "From Suffering to Easter Joy." (*TLE*) XXII-3: 20-21. F82
- Arndt, Ruth. "Who Am I?" (*TLE*) XV-2: 9-10. D74
- Gerlach, Joel. "It's Only a Matter of Interpretation?" (*TLE*) XV-1: 5-7. O74
- Gerlach, Joel. "Holy Gospel, Not Holey Gospel." (*TLE*) XVI-2: 2-3. D75
- Grunze, Richard. "Why So Few Fruits of the Spirit?" (*TLE*) XV-3: 22-24. F75
- Grunze, Richard. "Signs of the Time." (*TLE*) XXI-1: 20-23. O80
- Habermann, Elwood. "Piercing the Confusion." (*TLE*) IV-1: 2-3. O63
- Hartwig, Theodore. "Do Not Judge, or You, too, Will be Judged". XLVII-3: 87-88. F07. (*TLE*).
- Hartwig, Theodore. "On Being Offended and Taking Offense". XLVI-4: 126-127. M06. (*TLE*).
- Hochmuth, Robert. "Fading World-Unfading Glory." (*TLE*) XIX-2: 2-4. D78
- Jeske, Mark. "Ten Hard Questions About Baptism." (*TLE*) XXV-2: 9-12. D84
- Kieta, Geoffrey. "Our Daily Struggle With Sin." (*TLE*) XXXVII-4: 100-106 M97
- Kieta, Geoffrey. "Fellowship." (*TLE*) XLIII-2: 46-49 D02.
- Koch, H.A. "Gleanings From the Field of Prayer." (*LSB*) XVIII-2: 1-3. D47
- Koelpin, Arnold. "The Christian Teacher's Understanding of Prayer." (*TLE*) XXVIII-1: 5-9. O87
- Koeninger, L. "The Gospel as the Means of Sanctification." (*LSB*) VIII-2: 1-2. D37
- Koeninger, L. "The Gospel as the Means of Sanctification (conclusion)." (*LSB*) VIII-3: 1-2. F37
- Meyer, Edward. "Music-Making in the Service of the Gospel." (*TLE*) XV-1: 21-23. O74
- Meyer, F.W. "Serving God's Happy People." (*TLE*) XI-3: 2-4. F71
- Meyer, Henry. "Gleanings From the Field of Prayer." (*LSB*) XVIII-3: 1. F48
- Meyer, Joh P. "Rejoice Because Your Names are Written in Heaven." (*TLE*) IV-3: 2-3. F64
- Olson, Lawrence. "The Baptism of the Children of Nonmembers." (*TLE*) XXXVI-1: 4-7 O95
- Pope, James. "Neither Right Nor Wrong? ". XLVII-1: 3. O06. (*TLE*).
- Quandt, E.F. "John the Baptist." (*LSB*) X-4: 2-3. My40
- Schaller, Adalbert. "Gleanings From the Field of Prayer." (*LSB*) XVIII-4: 1-3. My48
- Schaller, Egbert. "Gleanings From the Field of Prayer." (*LSB*) XVIII-1: 1-2. O47
- Schlieve, Richard. "The Doxology of the Lord's Prayer." (*TLE*) XXVIII-4: 76-77. My88
- Schulz, Reuel. "Most Important Little Word, A." (*TLE*) XV-4: 4-5. My75
- Toppe, Fred. "Praising God for Our Adversities." (*TLE*) XXII-4: 19-22. My82
- Vogel, Heinrich. "Noah's Curse." (*TLE*) XXVI-2: 19-21. D85
- Voss, Arthur. "State Teachers' Conference Sermon." (*LSB*) VI-2: 1-2. D35
- Westendorf, S.E. "What is the Status of .... Who Signs a Marriage Contract? (1)." (*LSB*) XII-3: 2-3. Mr42
- Westendorf, S.E. "What is the Status of .... Who Signs a Marriage Contract? (2)." (*LSB*) XII-4: 1-3. My42
- Westendorf, S.E. "Salvation Through Grace." (*LSB*) XXI-3: 1-2. F51
- Westerhaus, Martin. "Decision Theology—What Is It and How do You Recognize It?" (*PL*) IV-1: 23-24 Fa95
- Wichmann, W.F. "How Our Children May See Evil of Boy Scout Through Catechism." (*LSB*) XXIV-4: 3-6. My4
- Wietzke, W.H. "Old Adam—Improved or Crucified?" (*TLE*) III-4: 2-5. My63

## Elderly

- Bauer, Elvera. "My Prayers for Prisoners." (*LL*). IX-2:24-25 Win01
- Braun, John. "Radiate: An Interview With Richard and Lorraine Raabe." (*LL*). IX-2:14-17 Win01
- Carmichael, Scott. "I Can't Sit Still." (*LL*). IX-2:18-19 Win01
- Carmichael, Scott. "Senior Volunteers." (*LL*). IX-2:8-10 Win01
- Hartman, Robert. "Seniors Share Christ." (*LL*). IX-2:26-27 Win01
- Nelson, Joel. "Seniors and Schools." (*LL*). IX-2:20-21 Win01
- Piepenbrink, Fred. "Senior VolunteersYour AARP Letter." (*LL*). IX-2:4-7 Win01

- Seidel, Gene. "Help! I Can't Hear You." (LL) X-3:28-29 Sp02  
 Winters, Richard. "Use the Telephone." (LL). IX-2:22-23 Win01

## Elementary School

- A.W. (tran. by William Schink). "One Hundred Years Ago." (TLE) XVI-3: 2-4. F76  
 Aaberg, Theodore. "Seeing the School." (ELS). VI: 4-5 Fa99  
 Anonymous. "The Queen of Sheba, An Example for Christian Parents." (LSB) VI-3: 8. F36  
 Anonymous. "Statement on the Philosophy and Purpose of the CDS." (TLE) X-2: 12-13. D69  
 Anonymous. "Home Mission Policy re Establishment and Support of Mission Day Schools." (TLE) XII-3: 24. F72  
 Bitter, Donald. "Pastor as Promoter of the Christian Day School, The." (TLE) I-3: 2-3. F61  
 Bitter, Donald. "Pastor as Promoter of the Christian Day School, The." (TLE) X-3: 10-11. F70  
 Boll, Arlyn. "Lights that Shinel." (TLE) XI-3: 7-8. F71  
 Brandt, James. "Outreach in Parish Schools." (LL) XII-1: 28-29 Fa03.  
 Brick, Delmar. "Home and the Christian Day School, The." (TLE) VI-4: 8-9. My66  
 Fehlaue, Adolph. "Can We Evaluate?" (TLE) VI-4: 4-5. My66  
 Fehlaue, Adolph. "God's Grace and Our Christian Schools." (TLE) XV-2: 4. D74  
 Fehr, Anne. "In God's Strength Princeton Evangelical Lutheran School." (ELS) I-3:4 Su98  
 Fischer, Gervasius. "The Consolidated Elementary School." (LSB) XVII-3: 1-2. F47  
 Gerlach, Joel. "Toward a Deeper Appreciation." (TLE) X-4: 2-3. My70  
 Heier, Otto. "Rugged Individualists." (TLE) I-2: 2. D60  
 Hewitt, James. "School Closings a Blessing?" (TLE) XXVI-2: 16-18. D85  
 Inniger, Jeff. "Is Your School Climate Controlled". XIII-1: 22-23 Fa04. (LL).  
 Isch, John. "The Disappearing Children." (TLE) XXXV-3: 74-79 F95  
 Koehler, Edward. "Cooperation of Home and School." (TLE) XIX-1: 5-6. O78  
 Kovach, John. "Generation to Generation." (PL) IV-2: 33-34 Sp96  
 Leverence, Kenneth. "Introducing Modern Mathematics Into Our Schools." (TLE) III-4: 12-14. My63  
 McKenney, Bruce. "Team Ministry—One Pastor's View." (PL) I-2: 43-44 Sp93  
 Nelson, Joel. "ORLS—A One-room School." (TLE) XXVII-2: 2-4. D86  
 Nelson, Joel. "A Team Effort." (LL). IX-1: 24-25 Fall00  
 Nelson, Joel. "Help Wantged." (LL). VIII-3: 20-21 Sp00  
 Rank, Thomas. "Scarville Lutheran School." (ELS) V: -4 Sp99  
 Roth, Jay. "Promoting the Christian Day School." (TLE) XII-4: 15-17. My72  
 Sauer, Theodore. "What Can Be Done to Promote a CDS in Those Congregations Which have None." (LSB) XXII-4: 6-8. My52  
 Schaller, W. "Cultivation of Interest in CDS at Our Academies." (LSB) XI-4: 1-2. My41  
 Schierenbeck, Robert. "How Can and Should a Pastor Bring the Matter of the CDS." (TLE) XI-1: 5-6. O70  
 Schmeling, Daniel. "Families: A Focus of the Lutheran Schools' Mission." (PL) I-1: 41-42. N92  
 Schmidt, Wayne. "Reason, The." (TLE) II-2: 2-3. D61  
 Schultz, Erhardt. "Day School Kids and The Other Kids." (TLE) XVIII-1: 5-7. O77  
 Stellhorn, A. C. "Home Rehabilitation and the School." (TLE) II-3: 20. F62  
 Stindt, A.C. "Time Allotment and Order of Subjects in the Daily Program." (LSB) VIII-1: 5. S37  
 Valleskey, David. "Christian Day School and Sunday School." (TLE) XIV-3: 5-6. F74  
 Zimmerman, Fred. "Train a Child in the Way He Should Go." (PL) IV-3: 19 Su96

## Emotions

- Beres, Pamela. "Speaking of Shyness." (LP) IX-3: 6-7 Jan/Feb 02  
 Dehaan, Robert. "Helping the Withdrawn Child." (TLE) IX-4: 20-21. My69  
 Dusseau, Ray. "Anger in Their Eyes." (LP) IX-4: 10-12 Ma/Ap 02  
 Juern, John. "Controlling Anger." (LP) IV-6:7 July/Aug 1997  
 Juern, John. "Beyond having a Bad Day." (LP) VI-5: 4: May/June99  
 Juern, John. "Kids With An Attitude." (LP). VII-6: 5 July/Aug 00  
 Juern, John. "Teaching Kindness." (LP) IX-5: 5 Ma/Ju 02  
 Sievert, Hertha. "Mental Health Problem in Our Schools, The." (TLE) II-4: 4-5. My62  
 Stroh, Elton. "Planning to Avoid Burnout." (PL) I-1: 12-13. N92

## Ethics

- Ahlswede, Eugene. "What Did You Do On Your Vacation?" (TLE) XXII-1: 2-4. O81  
 Ahlswede, Eugene. "Co-operation." (TLE) XXII-2: 2-4. D81  
 Ahlswede, Eugene. "How Well Do You Take Criticism?" (TLE) XXIV-3: 16. F84  
 Ahlswede, Eugene. "Sexual Abuse of Children, The." (TLE) XXVII-2: 1-2. D86  
 Ahlswede, Eugene. "Ignorance Is No Sin." (TLE) XXVII-3:

2-3. F87  
 Ahlswede, Eugene. "Let's Talk About Salary." (*TLE*) XXVI-II-4: 18-21. O87  
 Anonymous. "Cooperation and Order." (*TLE*) II-3: 21. F62  
 Arras, Florence. "Courtesy and Conduct of a Christian Teacher." (*TLE*) I-4: 4-7. My61  
 Beres, Pamela. "Gone Fishin'." (*LP*) IV-6: 5 July/August 1997  
 Boerneke, Leroy. "Broadening Intellectual Horizons." (*TLE*) XXIII-1: 22-24. O82  
 Braun, Mark. "Bible Cells?" (*TLE*) XX-3: 5-8. F80  
 Bushman, John. "Making Use of Leisure Time." (*LSB*) XXV-4: 8-11. My55  
 Czer, Ramona. "Sex Ed: Sharing and Listening." (*TLE*) XXXIV-2: 55-56 D93  
 Eickmann, Paul. "We Are Ambassadors." (*TLE*) I-4: 2. My61  
 Frey, Im. P. "The Proper Attitude Toward the Call." (*LSB*) XVI-4: 2-3. My46  
 Gerlach, Joel. "No Smooth Crosses, Please." (*TLE*) VIII-3: 2-3. F68  
 Gerlach, Joel. "More About a Teacher's Call." (*TLE*) X-2: 2-3. D69  
 Gruber, Joanne + Moldenhauer. "Christian Worship and the Copyright Laws." (*PL*) II-2: 32-35 Sp94  
 Grunze, Richard. "Necessary Choice, A." (*TLE*) VI-1: 2-4. O65  
 Grunze, Richard. "Necessary Choice, A." (*TLE*) XIV-1: 2-4. O73  
 Hahnke, Lloyd. "Humble to Serve." (*TLE*) VII-2: 2-3. D66  
 Hartman, Carol. "Teaching Morality in Public Schools." (*TLE*) XXXV-4: 106-110 My95  
 Hellermann, William. "Good Manners." (*LSB*) XIV-1: 3-5. S43  
 Helwig, Donald. "Do You Love Me?" (*TLE*) XX-3: 12-14. F80  
 Hochmuth, Robert. "What About Our Offense?" (*TLE*) XVIII-2: 2-4. D77  
 Hochmuth, Robert. "'79-'80 a Success?" (*TLE*) XX-1: 2-4. O79  
 Hochmuth, Robert. "Breathing Heaven's Oxygen." (*TLE*) XX-2: 2-4. D79  
 Isch, John. "Alexander Pope and the Pentium Chip." (*TLE*) XXXV-3: 67 F95  
 Janke, Richard. "Professional Ethics of a Lutheran Teacher (1)." (*LSB*) XVI-2: 3-6. D45  
 Janke, Richard. "Professional Ethics of a Lutheran Teacher (2)." (*LSB*) XVI-3: 3-5. F46  
 John, Harold. "Professional Growth — The Wondrous Dimension." (*TLE*) XXIII-4: 2-3. My83  
 Juern, John. "Teacher-Husband-Dad." (*TLE*) XXI-2: 21-22. D80  
 Knippel, Robert. "Out With the Truth." (*LP*). VII-3: 6-8 Jan/Feb00  
 Krueger, William. "The Christian Teacher and His Person." (*TLE*) IV-4: 10-11. My64

Meyer, Edward. "United States Copyright Law: Implications for the Church Musician." (*TLE*) XXIII-2: 13-15. D82  
 Moldenhauer, Kermit + Gruber. "Christian Worship and the Copyright Laws." (*PL*) II-2: 32-35 Sp94  
 Neumann, Mark. "High Stakes." (*LP*). VIII-6: 4-5 July/Aug01  
 Perham-Hester, "Katherine. New Life for Others." (*LP*). VII-6: 9 July/Aug 00  
 Petermann, Kurt. "A Sad Reflection." (*TLE*) XXII-3: 6-7. F82  
 Plath, LeDell. "Twelve-Month Call for All Teachers." (*TLE*) XIII-3: 6-9. F73  
 Schaller, Loren. "Some Thoughts on the Call." (*TLE*) XV-4: 2-3. My75  
 Schneck, James. "Moral Training: Not Just a Parent's Responsibility." (*ELS*) I-1: 1 Fall 97  
 Schultz, Dennis. "Call For Your Reactions, A." (*TLE*) XXVI-2: 3. D85  
 Sorgatz, Edwin. "Christian Teacher and His Congregation." (*TLE*) IV-4: 4-6. My64  
 Staab, William. "Ethics of the Lutheran Teacher (1)." (*TLE*) XX-3: 9-11. F80  
 Staab, William. "Ethics of the Lutheran Teacher (2)." (*TLE*) XX-4: 10-13. My80  
 Staab, William. "Ethics of the Lutheran Teacher (3)." (*TLE*) XXI-1: 14-16. O80  
 Snamiska, Paul. "To Clone or Not to Clone." (*LP*) XI-1: 30-31 Sep/Oct 03.  
 Timmel, K. "Inspiration Address: Wisconsin State Teachers' Conference." (*LSB*) VII-2: 1-2. D36  
 Wessel, Howard. "Exchange Your Papers." (*TLE*) XVII-2: 9-10. D76  
 Westendorf, Rolfe. "One Income or Two?" (*TLE*) XXVII-3: 14-16. F87  
 Wichmann, W.F. "What Do I Get Out of It?" (*TLE*) III-1: 2-3. O62  
 Willems, Paul. "What's Wrong With It?" (*TLE*) XXXIV-4: 104-106 My94

## Evaluation

Ahlswede, Eugene. "Do They Know?" (*TLE*) XXI-2: 2-4. D80  
 Anonymous. "The New Report Card." (*TLE*) V-1: 16-17. O64  
 Anonymous. "A Symposium." (*LSB*) VI-2: 3-4. D35  
 Anonymous. "Is the IQ on the Way Out?" (*LSB*) XX-3: 6-7. F50  
 Averbeck, Robert. "Teacher-made Tests." (*TLE*) VIII-1: 8-9. O67  
 Bliefernicht, E.R. "Psychological Measurements (part 4)." (*LSB*) IX-1: 2-3. S38  
 Bliefernicht, E.R. "Psychological Measurements (part 5)." (*LSB*) IX-3: 2-3. F39  
 Bliefernicht, E.R. "Psychological Measurements (part 6)." (*LSB*) IX-3: 2-3. F39

(LSB) IX-4: 3-4. My39  
 Bliefernicht, E.R. "Psychological Measurements (Part 1)." (LSB) VIII-1: 3-5. S37  
 Bliefernicht, E.R. "Psychological Measurements (part 2)." (LSB) VIII-2: 3-5. S37  
 Bliefernicht, E.R. "Psychological Measurements (part 3)." (LSB) VIII-4: 3-4. My38  
 Fehlauer, Adolph. "Can We Evaluate?" (TLE) VI-4: 4-5. My66  
 Fischer, William. "Evaluating Religious Materials." (TLE) XIX-4: 5-7. My79  
 Frey, Conrad. "Curriculum Study and the Preparation of Course Syllabi." (TLE) VI-3: 10-11. F66  
 Gerlach, Vernon. "Evaluating the Arithmetic Program in Our Schools (1)." (LSB) XXI-1: 5-6. O50  
 Gerlach, Vernon. "Evaluating the Arithmetic Program in Our Schools (2)." (LSB) XXI-2: 3-4. D50  
 Gerlach, Vernon. "Evaluating the Arithmetic Program in Our Schools (3)." (LSB) XXI-3: 4-6. F51  
 Gerlach, Vernon. "Evaluating the Arithmetic Program in Our Schools (4)." (LSB) XXI-4: 4-7. My51  
 Greenfield, Sandra. "Are They Falling Through the Cracks?" (TLE) XXVI-3: 10-12. F86  
 Hagedorn, Grace. "Is That How You Grade?" (TLE) XVIII-3: 12-13. F78  
 Hochmuth, Robert. "Certified Quality Education." (TLE) XIX-1: 2-4. O78  
 Jacobson, Gerald. "Evaluation—Can We Do It?" (TLE) XX-1: 22-23. O79  
 Keup, Louis. "Report-to-Parents Day." (LSB) XXII-3: 6. F52  
 LaGrow, George. "Pastor or Fail: Research vs Practice." (TLE) XXXI-4: 88-91. My91  
 Meyer, Edward. "Behavioral Objectives for School Music." (TLE) XV-3: 13-15. F75  
 Meyer, F.W. "The Report Card." (LSB) XIII-2: 4-5. D42  
 Plath, LeDell. "Curriculum Evaluation and Study Pilot Programs." (TLE) X-4: 10-11. My70  
 Rauschke, Armin. "Teacher-Constructed Achievement Tests (1)." (LSB) XXII-1: 5-7. O51  
 Rauschke, Armin. "Teacher-Constructed Achievement Tests (2)." (LSB) XXII-2: 5-6. D51  
 Ruege, Paul. "Meaningful Ranking of High School Seniors." (TLE) I-2: 10-11. D60  
 Schultz, F. W. "Child and the Curriculum of the School, The." (TLE) IX-3: 9-10. F69  
 Schultz, John. "Becoming Involved in Curriculum Study." (TLE) XI-4: 7-9. My71  
 Sneaden, Victor. "The Report Card (1)." (LSB) XXIV-3: 7-8. F54  
 Sneaden, Victor. "The Report Card (2)." (LSB) XXIV-4: 6-7. My54  
 Trettin, Emil. "The Testing Program in Our Schools." (LSB) XXIII-2: 7-8. D52  
 Wessel, Howard. "Exchange Your Papers." (TLE) XVII-2:

9-10. D76

Willems, Paul. "Is There a Self-Study in Your Future?" (TLE) XXIII-4: 14-15. My83

## Evangelism

Anonymous. "Home Mission Policy re Establishment and Support of Mission Day Schools." (TLE) XII-3: 24. F72  
 Anonymous. "Reach Out and Touch Someone." (ELS). VII:3 Sp/Su2000  
 Barber, John. "We Put Up a Poster but Nobody Came!" (PL) I-1: 32-33. N92  
 Bauer, Jackie. "A Child Shall Lead Them." (LL)V-1:23-24 Fa97  
 Baumler, Daniel. "Head Cheese Evangelism." (PL) II-2: 17-18 Sp94  
 Bitter, Mark. "An Outreach Program: Christmas for Kids." (PL) I-3: 46-47 Su93  
 Bluhm, Merle. "Our Friends Who Need Jesus List." (LL)V-4:23-24 Su97  
 Boeder, John. "Introducing 'Daylight'". XLVI-3: 78-79. F06. (TLE).  
 Boileau, Elaine. "Playgroup Evangelism." (PL) I-3: 36 Su93  
 Braun, John. "There's a War Going On." (LL)V-1:14-17 Fa97  
 Braun, John. "Church not Disneyland." (LL) VI-6: 14-17 Su98  
 Braun, John. "Coming Home: An Interview with Craig Parton." (LL). VIII-1: 14-17 Fa99  
 Braun, John. "Who's in Charge." (LL) XI-2: 14-17 Wi03.  
 Braun, John. "Plan, Prepare, Proclaim: An Interview with Michael Hintz." (LL) XII-4: 14-17 Su04.  
 Braun, John. "Perspective on Trends." (LL) XI-3: 14-17 Sp03.  
 Brick, Delmar. "Call Night Sermonette." (TLE) XIX-1: 23-24. O78  
 Bruss, Wesley. "The Zambia-Iowa Connection." (PL) II-3: 27-28 Su94  
 Cares, Mark. "Speaking the Truth in Love to Mormons." (PL) III-3: 22-23 Su95  
 Cares, Mark. "Christmas for Adults." (PL) IV-3: 42-43 Su96  
 Cares, Mark. "Canvassing—A Fresh Look." (LL)V-1:11. Fa97  
 Degner, Steven. "We Believe—Therefore We Speak." (PL) III-3: 19,21 Su95  
 Dobberstein, Donn. "Speak the Truth in Love." (LL) XII-3: 22-23 Sp04.  
 Dorn, Ann. "S.O.S. Sunday." (PL) II-1: 43-45 Fa93  
 Ehlers, Timothy. "Finding Prospects in Rural Settings." (PL) II-2: 19-21 Sp94  
 Ehlert, Leon. "Knowing What to Say." (LL) XII-4: 28-29 Su04.  
 Ellenberger, Larry. "The Gospel Works." (PL) I-1: 35. N92  
 Frohwirth, Glenn. "Now What." (LL) XI-2: 18-19 Wi03.  
 Geiger, Michael. "Church Shoppers." (LL) X-4:20-21 Su02

- George, Michael. "Take the Challenge." (LL)VI-1:26-27 Fa97
- Gerlach, Joel. "He Knows The Shepherd." (TLE) X-3: 2-3. F70
- Gerlach, Joel. "Being All Things to All Men." (TLE) XII-1: 2-3. O71
- Gerlach, Joel. "Turn Up the Thermostat, Please!" (TLE) XIII-4: 2-3. My73
- Gerlach, Joel. "About Whether the Weather is About to Change, or Will It ...." (TLE) XV-2: 2-3. D74
- Gieschen, Daniel. "Suggested School Enrollment Policies for Non-member Children." (TLE) XI-2: 12-15. D70
- Gieschen, Philip. "Be Prepared.... to Give Answer about Your Christian Faith." (PL) III-2: 40 Sp95
- Griepentrog, Darlene. "Spreading the World: Sunday Schools are For Nurture and Evan." (PL) IV-3: 7-8 Su96
- Granberg, Steve. "Church and School Together." (LL) XII-3: 26-27 Sp04. Elementary School.
- Hagedorn, Fred. "Teaching in the Inner City." (TLE) XI-4: 10-11. My71
- Hagedorn, Harold. "Sunday School Children From Unchurched Homes—Follow-up." (PCE) II-2: 23-24. Fa90
- Hartman, Robert. "How to Welcome First-time Guests." (PL) III-1: 32,35 Fa94
- Hartman, Robert. "Ideas for Outreach." (PL) III-2: 38-39 Sp95
- Hartman, Robert. "Changing Neighborhoods." (LL)VI-6:22-23 Sp98
- Hartman, Robert. "Staffing the Evangelism Committee." (LL) IX-4:24-25 Su01
- Hatzung, Michael. "Sunday School: A Mission Arm of the Church." (PCE) II-1: 10-11. Su90
- Helwig, Don. "A Victory for the Sage." (PL) IV-1: 33-34 Fa95
- Helwig, Donald. "Devotions Written and Led by Children." (TLE) XVIII-1: 12-13. O77
- Hering, Bob. "Gospel-Powered Outreach: Mobilizing People With the Gospel." (PL) I-1: 29. N92
- Herman, Edgar. "Serve Community Institutions." (LL) IX-4:20-21 Su01
- Hintz, Michael. "Our Experience with Friendship Sunday." (PL) I-1: 36. N92
- Hochmuth, Carl. "Smiling Faces—Evangelism in Our Schools." (LL)V-1:21-22 Fa97
- Hochmuth, Carl. "The First Steps of a Christian Toddler Witness." (LL), VI-2:20-21 Wi98
- Hopf, Stephanie. "The Faith of the Children." (LP) IX-2: 12-13 Nov/Dec 01
- Huebner, John. "What Does an Unbeliever Think?" (LL)V-1:4-7 Fa97
- Isch, John. "Hunkered-down Christians." (TLE) XXXVII-1: 3 O96
- Isch, John. "Referred to by a friend." (TLE) XXXVII-3: 67 F97
- Jacobs, Paul. "Teaching Children to Witness." (PL) IV-1: 39-40 Fa95
- Janke, Philip. "Our Part-Time 'Mission Arms'—Are They as Strong .... Could." (TLE) VI-3: 14-15. F66
- Kaiser, Ruth. "Spread the Good News." (TLE) XXIV-3: 7-8. F84
- Kapler, David. "Gospel Communicators: Share, Witness, Proclaim." (PL) IV-1: 35-36 Fa95
- Kastens, Gerald. "WELS Sunday Schools: 'Let the Children Come'." (PL) III-2: 16-17 Sp95
- Kastens, Gerald. "And I Can Go and Tell." (PL) III-3: 24-25 Su95
- Kastens, Gerald. "The Great Go-Mission in Manitowoc." (LL), V-1:25-27 Fa97
- Kehl, David. "Families--Effective Evangelism Committees." (LL) XII-4: 24-25 Su04.
- Keibel, Armin. "Great Assignment, The." (TLE) VI-1: 22-23. O65
- Kelm, Daniel. "Open Bibles and Open Hearts—Close the Back Door." (PL) I-2: 20-21 Sp93
- Kieta, Geoffrey. "Evangelism." (TLE) XLIII-3: 116-119 My03.
- Knippel, Naomi. "We Held a Friendship Fair." (PL) III-2: 41 Sp95
- Knutson, Craig. "Prepare to Answer!" (PL) II-1: 42,45 Fa93
- Koeplin, David + Raddatz. "Evangelism Program in a Lutheran High School, An." (TLE) XXIV-3: 8-10. F84
- Konell, Cheryl. "Letter from Naples, Italy." (LL)V-2:24-25 Wi97
- Krug, Gary. "Equipping Children for Evangelism (1)." (TLE) XXVIII-1: 10-14. O87
- Krug, Gary. "Equipping Children for Evangelism (2)." (TLE) XXVIII-2: 33-36. D87
- LaDue, Dorothy. "Outdoor Worship at Pilgrim." (PL) IV-2: 20-21 Sp96
- Lange, Lyle. "Sing a Song of Salvation!" (TLE) XXIV-3: 4-6. F84
- Lange, Lyle. "Evangelism Emphasis at MLC". XLVI-1: 21-22. O05. (TLE).
- Leonard, Bob. "Witnessing for Jesus—It's What Gives Us Joy." (LL)V-2:25-26 Wi97
- Mahnke, Jon. "The Child as a Missionary." (LSB) XXIX-1: 1-6. O58
- Mantey, Curtis. "The School, The Teacher, and Evangelism." (ELS) I-1:3,8 Fa97
- Mantey, Curtis. "The School, the Teacher, and Evangelism." (ELS) I-1: 3,8 Fall 97
- Meyer, Edward. "Sing a Song of Salvation." (TLE) XXIV-4: 11-14. My84
- Nell, Christine. "Teaching Children to Witness." (PL) I-2: 38-39 Sp93
- Neuman, Kevin. "Evangelism is for Children Too." (PL) III-3: 19,21 Su95
- Olson, Lawrence. "Insights on Outreach: Agents for God." (PL) I-1: 34. N92

- Olson, Lawrence. "Insights on Outreach." *(PL)* I-2: 34,36 Sp93
- Olson, Lawrence. "Outreach Insights: Evangelism and Music." *(PL)* II-1: 14-15 Fa93
- Olson, Lawrence. "Congregational Staffing for Evangelism." *(PL)* II-3: 29 Su94
- Olson, Lawrence. "The Baptism of the Children of Nonmembers." *(TLE)* XXXVI-1: 4-7 O95
- Pankow, Erhard. "Lenten Evangelism Program." *(TLE)* VI-2: 15. D65
- Paustian, Mark. "Bible Story Evangelism." *(LL)* VI-6:22-23 Su98
- Peil, Tyler & Jill. "Friends Become Family." *(LL)* XII-4: 20-21 Su04.
- Plath, LeDell. "Read More." *(LL)* VI-1:18-19 Fa97
- Pope, James. "Reaching Out With Schools". XLV-2: 35. D04. *(TLE)*.
- Prange, Paul. "What are You Listening To." *(LL)* XII-4: 4-7 Su04.
- Raddatz, Darwin. "Evangelism Library from San Jose: An Integrated Program on." *(TLE)* XXIV-3: 12-14. F84
- Raddatz, Darwin + Koeplin. "Evangelism Program in a Lutheran High School." *(TLE)* XXIV-3: 8-10. F84
- Radloff, James. "Friendship Witnessing...A Way of Life." *(PL)* I-3: 50 Su93
- Radloff, James. "Bring a FRAN to Meet Jesus." *(PL)* II-2: 22-23 Sp94
- Radloff, James. "We Are Witnesses—but in Different Ways!." *(PL)* III-1: 34-35 Fa94
- Radloff, James. "Me? A Witness?" *(PL)* IV-2: 16,18 Sp96
- Radloff, James. "The Best Defense? A Potent Offense!." *(PL)* IV-3: 41 Su96
- Radloff, James. "The Forgotten P of the Great Commission." *(LL)* V-1:8-9 Fa97
- Radloff, James. "The Five M's of the Great Commission." *(LL)* VI-1:28-29 Fa97
- Rosenbaum, David. "World Connections." *(LP)* X-5: 30-31 My/Ju 03.
- Rosenbaum, David. "Somewhere Inside the Rainbow." *(LL)* XII-4: 8-10 Su04.
- Schmeling, Daniel. "Language Curriculum and Communicating the Gospel." *(TLE)* XXI-1: 10-11. O80
- Schmeling, Daniel. "Renewed Interest in the Arab-Muslim World, A." *(TLE)* XXI-3: 11-12. F81
- Schmugge, Karl. "Outreach at International Plowing Match." *(PL)* III-3: 26-27 Su95
- Schultz, Anthony. "The Littlest Missionaries Have Motive, Means and Opportunity." *(TLE)* XXX-2: 28-33. D89
- Schulz, Mark. "Marching with the King's Kids." *(PL)* III-2: 12-13 Sp95
- Schulz, Mark. "Out of the Tents." *(LL)* XII-3: 20-21 Sp04.
- Schulz, Wayne. "Nurture and Outreach." *(LL)* X:1 18-19 Fa01
- Schulz, Wayne. "Worship and Outreach: Partners in Life." *(PL)* I-2: 37,39 Sp93
- Schulz, Wayne. "Worship and Outreach: Partners in Life (2)." *(PL)* I-3: 48-49 Su93
- Sellnow, David. "Whoever is Not Against Us is For Us". XLVII-3: 91-96. F07. *(TLE)*.
- Sorum, E.Allen. "Our Lutheran Heritage of Christian Education is Also the Evangelistic Solution to American City's Biggest Problem." *(TLE)* XXXVII-3: 68-79 F97
- Sorum, E. Allen. "Keeping Lutheran Schools Lutheran". XLVII-1: 11-19. O06. *(TLE)*.
- Staab, William. "Evangelism Opportunities." *(TLE)* XX-1: 10-12. O79
- Staab, William. "My Road to Faith." *(TLE)* XX-2: 9-11. D79
- Thiele, Tom. "Gospel Outreach Via the Mail." *(PL)* IV-1: 37-38 Fa95
- Tiefel, James. "Worship and Evangelism: Strive for a Warm and Caring Atmosphere." *(PL)* III-3: 17-18 Su95
- Trapp, Thomas. "One Person." *(PL)* I-3: 37-38 Su93
- Valleskey, Wilmer. "Let's Look Ahead—and Plan Ahead." *(TLE)* V-2: 13-15. D64
- Voss, Robert. "The Church Meeting, Its Challenge." *(TLE)* V-4: 14-16. My65
- Voss, Verne. "The Pilgrim Crusade: A Member Reclamation Program." *(PL)* I-1: 30-31. N92
- Voss, Verne. "Witness to Non-Christian Family Members." *(PL)* I-2: 35-36 Sp93
- Warnecke, Richard. "He Needs God's Love Today." *(LL)* VII-2: 22-23 Wi99
- Werner, F.A. "Gospel Integrates, The." *(TLE)* III-3: 2-3. F63
- Westra, Charles. "Plan to Share." *(LL)*. VII-4: 4-7 Su99
- Widmann, Warren. "Outreach: A Way of Life at Grace." *(PL)* IV-2: 17-18 Sp96
- Wildauer, Martin. "I M 4 M W." *(PL)* IV-2: 19,21 Sp96
- Witte, Steven. "One Person at a Time." *(LL)* XII-3: 4-7 Sp04.
- Woldt, Alfon. "Reach Out Through Special Ministries." *(LL)* V-1:28-29 Fa97
- Woldt, Michael. "Question and Answer." *(LP)* V-2:16 Nov/Dec 1997
- Ziesemer, Richard. "Part-time Agency for Collegiates, A." *(TLE)* XV-2: 19-20. D74
- Zimmermann, Walter. "Teaching Children to Speak Out About Christ." *(TLE)* XXIV-3: 2-4. F84

## Exceptionality

- Averbeck, Julia. "Computers and Children With Special Learning Needs." *(TLE)* XXXII-1: 25-26. O91
- Averbeck, Julia. "What is the Value of Diagnostic Testing?" *(TLE)* XXXVI-1: 8-10 O95
- Averbeck, Robert. "Book Reviews." *(TLE)* XXIV-1: 7-8. O83
- Balge, Ellen. "The Blessings of Inclusion: An Example From a WELS School." *(PL)* IV-2: 13,15 Sp96

- Barnes, Glenn. "Teaching the Gifted Child—Who?" (*TLE*) XXV-2: 16-18. D84
- Bartel, Grace. "Teaching the Gospel to the Hearing Impaired: Teacher's Perception." (*PCE*) I-2: 27. Fa89
- Behringer, James & Lisa Kluge. "Narrowing the Gap." (*LL*). VII-3: 28-29 Sp99
- Born, Silas. "Dyslexia-Intervention." (*ELS*) I-3:3 Su98
- Braun, John. "Hear! Hear!" (*LL*). VII-3: 14-17 Sp99
- Czer, Ramona. "Tending God's Artists." (*TLE*) XXX-2: 44-46. D89
- Dehaan, Robert. "Helping the Withdrawn Child." (*TLE*) IX-4: 20-21. My69
- Dehaan, Robert. "Discovering Children with Gifts." (*TLE*) IX-4: 22. My69
- Ehlke, RolandCap. "Teaching the Gospel to the Hearing Impaired: Parent's Perception." (*PCE*) I-2: 26. Fa89
- Engel, Natalie. "Speech Without Fear." (*TLE*) II-2: 17-18. D61
- Esmeier, Jim. "New Technique Helps Communication." (*PL*) IV-1: 31-32 Fa95
- Evenson, Linda. "ADHD: Attention Deficit/Hyperactivity Disorder." (*LP*) III-1: 4. Sep/Oct 95
- Fisher, Kimberly. "Inclusion in Our Schools". XIII-2 24-25 Wi05. (*LL*)
- Fischer, Wayne. "Special Education? We ARE Doing It!." (*PL*) II-2: 15-16 Sp94
- Fischer, Wayne. "What Will Make It Happen?" (*TLE*) XXXIII-3: 80-84. F93
- Fischer, Wayne. "Discipline and the Special Needs Child." (*TLE*) XXXIV-4: 100-103 My94
- Geiman, Ruth. "The Right Fit for Fragile Learners." (*LP*). VII-2: 6-7 Nov/Dec 99
- Greenfield, Gary. "Disadvantaged Child—Our New Frontier, The." (*TLE*) IX-4: 7-9. My69
- Hanneman, Daryl. "Knowing the Terminology and Helping the Child." (*TLE*) XXXV-2: 44-50 D94
- Hanneman, Daryl. "Psychoeducational Evaluations." (*TLE*) XXXVII-1: 10-12 O96
- Hanneman, Daryl. "Preparing for the IEP Conference." (*TLE*) XXXIX-2: 59-61 D98
- Harris, Margaret. "Irlen Syndrome in the Classroom". XLV-1:11-14. O04. (*TLE*).
- Hartman, John. "The Power of Music." (*LL*). VII-3: 24-25 Sp99
- Heinz-Petersen, Debra. "Characteristics of a Motivating Teacher." (*TLE*) XXXIII-3: 85-88. F93
- Heinz-Peterson, Debra. "Motivating Students for Learning." (*TLE*) XXXIII-4: 113-117. My93
- Heinz-Peterson, Debra. "Attention Deficit Hyperactivity Disorder." (*TLE*) XXXIV-2: 44-50. D93
- Hellermann, William. "Our Backward Pupil (1)." (*TLE*) XII-2: 10-11. D71
- Hellermann, William. "Our Backward Pupil (2)." (*TLE*) XII-3: 11-14. F72
- Hellermann, William. "Our Backward Pupil (3)." (*TLE*) XII-4: 10-12. My72
- Hennig, Richard. Show Cory the Way Home. (*LP*) X-6: 6-7 Ju/Au 03.
- Hering, Thomas. "Special Needs Students: A Principal's Perspective." (*TLE*) XLII-4:110-114 My01
- Hochmuth, Robert. "Richard: Confirming the Retarded." (*PCE*) III-1: 3-4. Su91
- Huhn, Armin. "Diagnostic and Remedial Reading (2)." (*LSB*) XXV-2: 3-6. D54
- Huhn, Armin. "Diagnostic and Remedial Reading (3)." (*LSB*) XXV-3: 3-5. F55
- Huhn, Armin. "Diagnostic and Remedial Reading (3)." (*LSB*) XXV-4: 3-7. My55
- Janke, Mary. "Helping the Retarded Child." (*TLE*) IX-4: 18-19. My69
- Juern, John. "Multidisciplinary Team Evaluation." (*TLE*) XXI-3: 18-19. F81
- Juern, John. "ADHD:A Treatment, not a Cure." (*LP*)V-1:4 Sep/Oct 1997
- Kieta, Geoffrey. "It's All Spanish to Me." (*TLE*) XXXIV-3: 68-71. F94
- Koeller, Ardis. "Starting Special Education in Your Classroom." (*TLE*) XXV-1: 2-3. O84
- Koeller, Ardis. "Included in God's Family." (*LL*) VII-1 28-29 Fa98
- Koeller, Ardis. "Assisting Parents in Helping .... Children With Special Needs." (*TLE*) XXVI-1: 12-14. O85
- Koeller, Ardis. "Special Needs Children: In the Mainstream of God's Love." (*TLE*) XXX-2: 39-43. D89
- Kruck, Keith. "Special Preparation." (*LL*). VIII-1: 24-25 Fa99
- Lanphear, Gerald. "Teacher's Role In Diagnosing Reading Problems." (*TLE*) XII-4: 7-9. My72
- Manthey, Elsa. "Music and the Learning Disabled Child." (*TLE*) XXIX-3: 69-70. F89
- Markgraf, Dale. "Meeting the Needs of Physically Disabled Students." (*TLE*). XL-4: 108-111 My00
- Martin, G. "Remedial Reading." (*LSB*) XII-4: 3-4. My42
- Meyer, John. "Making a Referral for Children With Special Needs." (*TLE*), XXXVIII-3 72-74 F98
- Mose, Jane. "Include the Developmentally Disabled." (*PL*) IV-1: 28-30 Fa95
- Neujahr, Charlene. "Special Education Book Reviews." (*TLE*) XXIV-4: 15-16. My84
- Noeldner, Patricia. "Special Needs Inclusion: Is it Best for All?" (*TLE*) XXXVII-4: 122-124 M97
- Plath, LeDell. "Identifying, Nurturing, Developing." (*TLE*) XXI-3: 5-7. F81
- Price, Jim and Carl Ziemer. "The Same in Different Ways." (*LL*) XII-4: 26-27 Su04.
- Riege, Irene. "The Voice of Jesus is Calling." (*PL*) I-2: 29 Sp93
- Ring, Lester. "Creativity." (*TLE*) I-2: 5-7. D60
- Schaller, Ruth. "Respite Care." (*PL*) II-1: 16-17 Fa93
- Schierenbeck, James R. "Helping the Uncertain Singer."

- (*TLE*) XXXIII-2: 52-53. D92
- Schmeling, Daniel. "Teaching the Gifted Child—Why?" (*TLE*) XXV-1: 4-6. O84
- Schroeder, Karen. "Blindsided. . . Yet Blessed." (*LP*). VIII-1: 4-5 Sep/Oct00
- Schroeder, Morton. "Exceptional Children." (*LSB*) XXIII-4: 2-4,13-14. My53
- Schultz, Beth. "Communicating Christ to One of His Sheep." (*PL*) IV-3: 35-36 Su96
- Schulz, Arthur. "Helping At-Risk Students." (*TLE*) XXXI-3: 51. F91
- Sievert, Erich. "LD—Learning Disabilities." (*TLE*) XVII-1: 11-13. O76
- Sievert, Hertha. "Mental Health Problem in Our Schools, The." (*TLE*) II-4: 4-5. My62
- Sievert, Hertha. "Speech Correction for Our Children." (*TLE*) IV-1: 4-5. O63
- Sievert, Hertha. "Case History of Speech Correction, A." (*TLE*) IV-2: 4. D63
- Sievert, Roger. "Teaching the Gifted." (*TLE*) XXV-3: 1-3. F85
- Special Education Committee. "A Philosophy of Christian Special Education." (*TLE*) XXXVI-3: 91-93 F96
- Spurgin, Alan. "Parents as Advocates for the Exceptional Child." (*TLE*) XXXVII-2: 53-56 D96
- Spurgin, Alan. "Accommodating the Student With Special Needs." (*TLE*) XXXVIII-2:56-58 D97
- Spurgin, Alan. "Understanding Oppositional Defiant Disorder." (*TLE*) XLII-4:122-124 My01
- Spurgin, Alan. "Accommodate and Adapt for Struggling Students". XLV-3: 80-83. F05. (*TLE*).
- Voss, Carol. "Teaching the Word of God to Retarded Persons." (*PCE*) I-1: 12-13. Su89
- Wessel, Howard. "Three Aids for Remedial Reading." (*TLE*) XVI-4: 12-13. My76
- Willems, Paul. "ADD." (*TLE*). XLI-2: 43-52 D00
- Winter, Louis. "Mentally Retarded, The." (*TLE*) IX-4: 10-17. My69
- Woldt, Alfons. "How Shall We Train Our Retarded Child?" (*TLE*) XIV-4: 11-12. My74
- Woldt, Alfons. "Serving All God's Children." (*LL*) X:1 28-29 Fa01
- Wolf, Alison. "Special Needs Children: A Parent's Perspective." (*TLE*) XLII-4:115-117 My01
- Wolfgram, Wendy. "The Deaf Lead the Deaf." (*LL*) XII-3: 28-29 Sp04.
- Wolff, Robert. "Christian Education for Them Too?" (*TLE*) XXII-2: 23-24. D81
- Zeitler, John. "Ministering to the Institutional Member." (*PL*) IV-3: 37-38 Su96
- Ziemer, Carl. "Special Care: Special People." (*LL*). VII-3: 26-27 Sp99
- Ziemer, Carl. "Speak Up." (*LL*) XII-1: 18-19 Fa03.
- Zimmerman, Jane. "A Special Kind of Class." (*PL*) I-1: 45-46. N92

## Faculty

- Ahlswede, Eugene. "Planning." (*TLE*) XXIV-3: 15. F84
- Knippel, Darrell. "Practical Suggestions for Faculty In-Service Programs." (*TLE*) XVI-3: 11-13. F76
- Meyer, F.W. "What Shall We Talk About?" (*LSB*) XIII-1: 1-2. S42
- Oswald, Kurt. "Professional Libraries in Our Schools." (*TLE*) I-4: 13-14. D61
- Warnke, Harold. "In-Service Training Course." (*TLE*) II-2: 10. D61
- Warnke, Harold. "Improving Our Faculty Meetings." (*TLE*) III-2: 10-12. D62
- Warnke, Harold. "Let's Improve Our Teacher Meetings." (*TLE*) IV-3: 12-14. F64

## Family

- Brohn, Karina. "Keep the Light Burning." (*LP*) X-5: 28-29 My/Ju 03.
- David, Lyndee. "Bananas and Wonder." (*LP*) X-6: 32 Ju/Au 03.
- Davis, Lyndee. "Party in the Castle Dungeon." (*LP*) X-2: 32 Nov/Dec02.
- Davis, Lyndee. "Playing at War." (*LP*) X-5: 32 My/Ju 03.
- Dorn, Jeff. "The Word on Our Doorframes." (*LP*) X-1: 6-8 Sep/Oct 02
- Heiges, Bill. "Starting with the Family." (*LL*) XII-3: 24-25 Sp04.
- Juern, John. "Compliant/defiant siblings." (*LP*) IX-2: 4 Nov/Dec 01
- Juern, John. "A Successful Christian Dad." (*LP*) X-6: 23 Ju/Au 03.
- Juern, John. "Divorce and Kids." (*LP*) XI-3: 23 Jan/Feb04.
- Kratz, Emily. "A Full Kitchen Table." (*LP*) IX-3: 4-5 Jan/Feb 02
- Komschlies, Jacqui. "Five Things I Want for My Children." (*LP*) XI-6: 6-8 July/Aug04.
- Lemke, Carol. "Roadkill Lasagna." (*LP*) X-6: 8 Ju/Au 03.
- Nelson, Joel. "Come, Join Our Family." (*LL*) XII-1: 24-25 Fa03.
- Patterson, Donald and Mary. "Muddy Buddy Races." (*LP*) X-4: 4-5 Ma/Ap 03.
- Rainwater, Pearl. "You—and Your Children's Children." (*LP*) IX-6:10-11 July/Aug02
- Schumacher, Ray. "The Danger of the Dorky Dad." (*LP*) IX-6:4-5 July/Aug02

## Finances

- Ahlswede, Eugene. "Let's Talk About Salary." (*TLE*) XXVI-II-4: 18-21. O87
- Anonymous. "Statement Re Federal Aid to Church-Related Schools." (*TLE*) IV-1: 19-20. O63
- Borgwardt, Wayne. "Parish Student Assistance Programs." (*PL*) I-3: 32 Su93

- Fehlauer, Adolph. "Shall My School Participate?" (*TLE*) VIII-1: 21-22. O67
- Fischer, Robert, Arnold Nommensen. "Planning Support for Schools". XLV-3: 79. F05. (*TLE*).
- Fischer, William. "Are We Short-changing the Sunday School?" (*TLE*) XX-4: 5-7. My80
- Gerlach, Joel. "Placard Parades and Assured Savings." (*TLE*) IX-2: 2-3. D68
- Gerlach, Joel. "Squeeze is On, The." (*TLE*) VIII-2: 2-3. D67
- Heins, Ronald. "Member Tuition—Bane or Blessing." (*PL*) I-3: 29-30 Su93
- Isch, John. "Vouchers." (*TLE*) XXXIV-3: 75-85. F94
- Isch, John R. "Attitudes Toward Lutheran Schools: A 1992 Survey." (*TLE*) XXXIII-1: 18-23. O92
- James Raabe. "Fund Management: Avoiding Criticism, Doing What is Right." (*TLE*) XXXI-4: 85-87. My91
- Kieselhorst, Jerome, et al. "The ALHS Development Director." (*TLE*) XXXII-4: 100-107. My92
- Krueger, Daniel, et al. "The ALHS Development Director." (*TLE*) XXXII-4: 100-107. My92
- Loeck, Joyce. "The Lutheran Elementary School in Crisis." (*TLE*) XXXIV-1: 16-18 O93
- Plath, LeDell. "Funding Lutheran Elementary Schools." (*TLE*) XXIX-3: 52-57. F89
- Raether, Dale. "You Want Money for What?!" (*PL*) I-1: 19-20. N92
- Roth, Jay. "School-Needs Fund, The." (*TLE*) XVI-3: 4. F76
- Schafer, Stephen F. "Funding the Parish School." (*TLE*) XXXIII-1: 4-11. O92
- Schmeling, Daniel. "Will You Help Build His House?" (*TLE*) XX-1: 15-16. O79
- Schmeling, Dan. "Funding Our Schools." (*LL*). IX-3:8-10 Sp01
- Scriver, Neil, et al. "The ALHS Development Director." (*TLE*) XXXII-4: 100-107. My92
- Sievert, Robert. "Government Aid to Parochial Schools - Opportunity or Oblig .." (*TLE*) XXII-2: 11-13. D81
- Sorum, E.Allen. "Our Lutheran Heritage of Christian Education is Also the Evangelistic Solution to American City's Biggest Problems." (*TLE*) XXXVII-3: 68-79 F97
- Spurgin, Alan. "Developing a Science Unit with Limited Funds and Facilities." (*TLE*) XVII-2: 11-12. D76
- Westendorf, Rolfe. "Tuition Dilemma, The." (*TLE*) XXV-3: 13-15. F85

## Foreign Language

- Bauer, Jackie. "Sprechen englisch?" (*LP*) VI-2: 9 Nov/Dec98
- Braun, John. "Love and Language: An Interview with Karl Walther." (*LL*) XII-1: 14-17 Fa03.
- Bohme, Shannon. "WELS Elementary Teachers Speak Out About Foreign Language in Elementary Schools." (*TLE*)XXXVIII-4 107-112 My98

- Eggert, Arthur. "Lutheran Cultures and the German Language: A Curriculum for ." (*TLE*) XXXV-2: 54-57 D94
- Lawrenz, Phoebe. "Learning a Second Language." (*TLE*) XXXV-3: 68-71 F95
- Pelzl, David. "Midsummer Adventure 1994." (*TLE*) XXXV-1: 28 O94
- Thompson, Glen. "Latin Across Three Time Zones." (*TLE*) XXXV-2: 51-53 D94

## Gifted

- Barnes, Glenn. "Teaching the Gifted Child—Who?" (*TLE*) XXV-2: 16-18. D84
- Dehaan, Robert. "Discovering Children with Gifts." (*TLE*) IX-4: 22. My69
- Krueger, Terri. "Teaching Children-Many Gifts/Many Possibilities". XLVI-2: 57-59. (*TLE*).
- Manthey, Elsa. "Thank You, Lord, for Your Gift." (*TLE*) XLIII-2: 44-45 D02.
- Mose, Jane. "Ten Myths About Giftedness." (*TLE*) XLII-2:53-58 D01
- Plath, LeDell. "Identifying, Nurturing, Developing." (*TLE*) XXI-3: 5-7. F81
- Schmeling, Daniel. "Teaching the Gifted Child—Why?" (*TLE*) XXV-1: 4-6. O84
- Schroeder, Tim. "Challenging Academically Talented Students in Lutheran High School." (*TLE*) XXX-2: 34-38. D89
- Sievert, Roger. "Teaching the Gifted." (*TLE*) XXV-3: 1-3. F85

## Government Aid

- Advisory Committee on Education. "Governmental Aid to Education." (*TLE*) VIII-1: 13-20. O67
- Eckert, Paul. "Released Time—A Good Answer for Part-time Agencies?" (*TLE*) XIII-1: 14-16. O72
- Fehlauer, Adolph. "Elementary and Secondary Education, The." (*TLE*) VI-3: 19-22. F66
- Freese, John. "Not Even a Thread or the Thong of a Sandal: Government Aid to Our Lutheran Schools." (*TLE*)XXXVIII-1:7-11 O97
- Gieschen, Paul. "The Danger of Seeking Government Concessions." (*LSB*) XVI-2: 2-3. D45
- Isch, John. "Vouchers." (*TLE*) XXXIV-3: 75-85. F94
- Sievert, Robert. "Government Aid to Parochial Schools - Opportunity or Oblig .." (*TLE*) XXII-2: 11-13. D81
- Pekrul, William. "A Retrospect on the Elementary School Principalship." (*TLE*) XXXVI-3: 85-88 F96

## High Schools

- Adickes, David. "Double or Nothing." (*TLE*) XVI-4: 20-22.

- My76
- Adickes, Robert + Meier. "Make Every Effort to Keep the Unity (Eph 4:3)." (*TLE*) XXIV-2: 12-13. D83
- Anderson, Einar. "Is the Establish of the Ninth-Year Junior High Feasible ...?" (*LSB*) XIX-1: 4-7. O48
- Armstrong, Emily. "Learning Centers in Lutheran High Schools." (*TLE*). XL-2: 52-57 D99
- Bauer, Jackie. "Electives: How to Make Wise Choices." (*LP*)V-4:9 Mar/April 1998
- Becker, James P. "Display Your Diamond." (*TLE*) XXXIII-2: 43-48. D92
- Bergholz, Hoge. "Guidance in Our High Schools." (*TLE*) VI-1: 13-15. O65
- Beres, Pamela. "It's a Date!" (*LP*). VIII-2: 13 Nov/Dec00
- Bode, Glenn + Kirk. "High School TV Production: A Conversation." (*TLE*) XVII-1: 16-19. O76
- Borchardt, Paul. "Did You Hear What Your High School Student Said?" (*TLE*) XIII-3: 15-18. F73
- Borgwardt, Wayne. "Boost Up and Out: Placement Services in an Area Lutheran HS." (*TLE*) XIII-4: 16-18. My73
- Borgwardt, Wayne. "Infant Walks! Development of the WELS Association of LHS." (*TLE*) XXI-2: 12-14. D80
- Collyard, Larry. "An Open Letter." (*PL*) IV-3: 20-21 Su96
- Czer, Larry. "Education 599: Writing Across the Curriculum." (*TLE*) XXX-3: 52-55. F90
- Deltgen, Gail. "Cooperative Learning in the High School Classroom." (*TLE*) XXXIII-3: 76-77. F93
- Fehlauer, Adolph. "Sixty Years of Christian Higher Education." (*TLE*) IV-2: 21. D63
- Found, Lester. "In Favor of Art for High School Curricula." (*TLE*) XVIII-2: 8-10. D77
- Fredrich, Edward. "Key Chore of a Key Course in Secondary Social Studies." (*TLE*) IV-2: 9-11. D63
- Grubbs, Mark. "Recruiting Church Workers in the Area Lutheran High School." (*TLE*) XXXII-4: 108-112. My92
- Gulczynski, Dennis. "Psychology in the High School." (*TLE*) XVIII-1: 14-16. O77
- Haar, Thomas. "Ways to Help Area Lutheran High Schools." (*TLE*) XXVIII-4: 86-88. My88
- Hartwig, Paul. "Area Lutheran High Schools: Are They Worth It?" (*TLE*) XXXIII-3: 72-75. F93
- Heidtke, Earl. "Where Will We Get Them?" (*PL*) I-1: 39-40. N92
- Hoepner, Walter. "Lutheran High Schools." (*TLE*) I-3: 11-12. F61
- Jacobson, Gerald + Zimmermann. "The Relationships of Adolescent Literature." (*TLE*) XXXVI-2: 57-59 D95
- Janke, Philip. "Qualifications for Religion Instructors in Secondary Schools." (*TLE*) XVI-1: 11-13. O75
- Kaesmeyer, Harris. "Outside Reading in the Lutheran High School." (*TLE*) VII-3: 10-11. F67
- Kaniess, Gerhard. "A Look at Luther High School Athletics." (*TLE*) II-1: 10-11. O61
- Kieselhorst, Jerome, et al. "The ALHS Development Director." (*TLE*) XXXII-4: 100-107. My92
- Kiessling, Elmer. "Lutheran High School Teacher's Approach to Literature, The." (*TLE*) III-3: 8-10. F63
- Kirk, Daniel + Bode. "High School TV Production: A Conversation." (*TLE*) XVII-1: 16-19. O76
- Koeplin, David + Raddatz. "Evangelism Program in a Lutheran High School, An." (*TLE*) XXIV-3: 8-10. F84
- Koestler, Arlen. "A Step Update from DMLC." (*TLE*) XXXII-3: 68-71. F92
- Krause, Robert. "WELS Lutheran High Schools: A Brief History." (*TLE*) XVIII-4: 22-23. My78
- Krueger, Daniel, et al. "The ALHS Development Director." (*TLE*) XXXII-4: 100-107. My92
- Lau, H. "Jeremiah 9, 23-24." (*LSB*) XII-2: 5-6. D41
- Leverence, Kenneth. "Introducing Modern Mathematics Into Our Schools." (*TLE*) III-4: 12-14. My63
- Meier, William + Adickes. "Make Every Effort to Keep the Unity (Eph 4:3)." (*TLE*) XXIV-2: 12-13. D83
- Mittelman, Carla. "Homework Fax at Arizona Lutheran Academy." (*PL*) II-3: 30,34 Su94
- Nelson, Jason. "Challenges in Counseling High School Youth." (*TLE*) XXXII-4: 127-128. My92
- Nolte, John. "Role of the Lutheran High School in Preparing Musicians for." (*TLE*) XVIII-3: 17-19. F78
- Oldfield, John. "Self-study and Accreditation." (*TLE*) XXXVI-2: 44-47 D95
- Pankow, Gerald. "Help the Disadvantaged Majority." (*TLE*) X-4: 8-9. My70
- Payne, David. "Family Ministry and the Lutheran High School." (*PL*) I-3: 34-35 Su93
- Payne, David. "The Lutheran High School and Its Role of Service." (*TLE*) XXX-4: 92-95. My90
- Peterson, Jon. "The Lutheran Sec School Choral Program: A Perspective for the 90s." (*TLE*) XXXI-1: 14-18. O90
- Pfeifer, Mike. "Motivation and Interest in the High School Choral Program:." (*TLE*) XXI-1: 17-19. O80
- Plath, Timothy. "Jack of All Trades: Master of (N)one." (*TLE*) XXXV-3: 86-88 F95
- Plitzuweit, James. "An Orphan Comes of Age." (*PL*) III-3: 30-31 Su95
- Raddatz, Darwin + Koeplin. "Evangelism Program in a Lutheran High School." (*TLE*) XXIV-3: 8-10. F84
- Ristow, Leroy. "Home, High School, and Country." (*TLE*) VI-4: 16-18. My66
- Ruddat, Rachel. "Worship at Manitowoc Lutheran High School." (*PL*) II-1: 25-26 Fa93
- Ruege, Paul. "Meaningful Ranking of High School Seniors." (*TLE*) I-2: 10-11. D60
- Schaller, Loren. "Flegel Und Backfishjahre." (*TLE*) XII-1: 13-15. O71
- Schaller, W. "Cultivation of Interest in CDS at Our Academies." (*LSB*) XI-4: 1-2. My41
- Schmeling, Daniel. "Why Economics?" (*TLE*) XIV-1: 14-16. O73
- Schmeling, Daniel. "What Economics?" (*TLE*) XIV-2: 16-

19. D73  
Schmeling, Daniel. "Walking Together: K-12 Partnership." (*TLE*) XXVIII-3: 54-56. F88  
Schroeder, David. "Oral History As a Teaching Approach in Secondary Schools." (*TLE*) XXVII-1: 11-14. O86  
Schroeder, Tim. "Challenging Academically Talented Students in Lutheran High School." (*TLE*) XXX-2: 34-38. D89  
Schultz, Dennis. "Has It? Will It? What About It?" (*TLE*) XXVI-1: 15-18. O85  
Schwecke, Floyd. "Career Education." (*TLE*) XIV-4: 22-24. My74  
Scriver, Neil, et al. "The ALHS Development Director." (*TLE*) XXXII-4: 100-107. My92  
Sitz, Herbert. "Book Selection in Our High School Libraries." (*TLE*) IV-3: 10-11. F64  
Sitz, Herbert. "Suggestions for the High School Library." (*TLE*) V-2: 10-12. D64  
Spaude, Luther. "Science in the Lutheran High School." (*TLE*) V-4: 11-13. My65  
Staab, William. "After High School — Then What?" (*TLE*) XXII-4: 8-10. My82  
Staab, William + Stueber. "Educational Alternatives." (*TLE*) XXII-1: 12-15. O81  
Strohm, Philip. "Christian Guidance Keynotes Individual Development." (*TLE*) IX-4: 2-4. My69  
Strohm, Philip. "A Program for the Improvement of Instruction." (*TLE*) XXIII-4: 12-13. My83  
Stueber, James + Staab. "Educational Alternatives." (*TLE*) XXII-1: 12-15. O81  
Vogel, Heinrich. "What is the Church's Responsibility .... Secondary Education." (*LSB*) XXVI-3: 4-7. F56  
Warnke, Harold. "A Survey of Lutheran High School Religion Courses." (*TLE*) I-1: 9-10. O60  
Warnke, Harold. "The Lutheran High School in Our Synod." (*TLE*) I-2: 9-10. D60  
Warnke, Harold. "God's Grace in the Story of WELS Area High Schools." (*TLE*) XV-1: 11-14. O74  
Warnke, Harold. "God's Grace has Guided Us." (*TLE*) XV-2: 6-8. D74  
Warnke, Harold. "God's Grace in the Future of Our WELS Lutheran High Schools." (*TLE*) XV-4: 14-16. My75  
Wiechmann, R. L. "Promoting Interest in Missions in our Area High Schools." (*TLE*) VII-1: 16-18. O66  
Willems, Paul. "Opening Doors." (*TLE*) XXVI-3: 16-18. F86  
Willems, Paul. "Firming the Foundations." (*TLE*) XXVI-4: 4-8. My86  
Zimmerman, Natalie + Jacobson. "The Relationships of Adolescent Literature." (*TLE*) XXXVI-2: 57-59 D95

## Historical

- A.W. (tran. by William Schink). "One Hundred Years Ago."

- (*TLE*) XVI-3: 2-4. F76  
Ahlswede, Eugene. "Happy Birthday, DMLC." (*TLE*) XXV-2: 6. D84  
Albrecht, Martin. "Our Hymnological Heritage." (*TLE*) XXIII-4: 19-21. My83  
Anonymous. "Our Educational Journal." (*TLE*) XI-1: 4. O70  
Anonymous. "Duties of the District Board of Education." (*LSB*) XX-3: 8. F50  
Anonymous. "Professor Adalbert Schaller." (*LSB*) XXII-3: 1. F52  
Anonymous. "Armin Rauschke." (*LSB*) XXII-4: 10-11. My52  
Arndt, Emanuel. "Theories of Learning (1)." (*LSB*) XXIII-1: 6-7. O52  
Arndt, Emanuel. "Theories of Learning (2)." (*LSB*) XXIII-2: 6-7. D52  
Arndt, Emanuel. "Theories of Learning (3)." (*LSB*) XXIII-3: 6-7. F53  
Arndt, Emanuel. "Theories of Learning (4)." (*LSB*) XXIV-4: 8-9. My54  
Averbeck, Robert. "Observing 125 Years of Grace in Our Schools." (*TLE*) XV-1: 7-9. O74  
Becker, Bruce. "Practicing What We Preach." (*LL*). VIII-2:22-23 Wi00  
Bierwagen, H.F. "Spener and Francke." (*LSB*) XVI-2: 6. D45  
Blume, F.E. "Education in Ancient Greece." (*LSB*) XVII-1: 4-5. O46  
Blume, F.E. "Education in the Hellenistic Age." (*LSB*) XVII-2: 6-7. D46  
Bode, Steve. "Introducing the Lutheran Hymnal ca 1941." (*PL*) II-1: 4-5,9 Fa93  
Braun, John. "Patient Leadership: An Interview with John Brenner." (*LL*). VIII-2:14-17 Wi00  
Brunner, Mark. "Building Your Church Archives (1)." (*PL*) II-2: 30-31, 35 Sp94  
Brunner, Mark. "Building Your Church Archives (2)." (*PL*) II-3: 49-50 Su94  
Buegel, Theo. "Golden Jubilee of the Minnesota Lutheran Teachers' Conference." (*LSB*) VII-2: 8. D36  
Dolan, Rachel. "Lutherans and the Common School." (*TLE*) XXXIX-2: 36-41 D98  
Ehlke, Roland Cap. "Harvest of Joy." (*LL*). VIII-2:26-27 Wi00  
Fairbairn, Helen. "You Can Go Home Again." (*TLE*) XXIV-4: 19-20. My84  
Fehlauer, Adolph. "Sixty Years of Christian Higher Education." (*TLE*) IV-2: 21. D63  
Fehlauer, Adolph. "In Memoriam: Emil Trettin." (*TLE*) XI-1: 2-3. O70  
Fehlauer, Adolph. "God's Grace and Our Christian Schools." (*TLE*) XV-2: 4. D74  
Fehlauer, Adolph. "The School Visitors' Workshop." (*LSB*) XXX-2: 3. D59

Gieschen, Paul. "Formal Opening of the Milwaukee Lutheran Teachers College." (*TLE*) I-1: 18-19. O60

Grasby, James. "A Brief History of Hymnals Used in WELS Congregations." (*TLE*) XXII-3: 8-11. F82

Grasby, James. "A Brief History of Hymnals Used in WELS Congregations." (*TLE*) XXII-4: 16-18. My82

Habermann, Elwood. "Test of a Century, The." (*TLE*) VI-3: 2-3. F66

Heier, Otto. "Why the Lutheran Educator." (*TLE*) I-1: 2-3. O60

Hoenecke, Roland. "Professor Emil Backer." (*LSB*) XXVI-II-1: 7-8. O57

Hoepner, Walter. "Lutheran High Schools." (*TLE*) I-3: 11-12. F61

Jacobson, Gerald. "Reformation Educational Thought." (*TLE*) XIX-1: 18-20. O78

Jacobson, Gerald. "Luther: An Enduring Influence on Education." (*TLE*) XIX-3: 20-22. F79

Kolander, John. "For Want of a Nail." (*LP*) VI-1: 10-11 Sep/Oct98

Klatt, Harold. "Prominent Educators Since the Days of Luther: Comenius." (*LSB*) XVI-1: 3. O45

Koelpin, Arnold. "Luther Lands — Then and Now." (*TLE*) XXIII-3: 8-11. F83

Koelpin, Arnold. "Luther's Wittenberg." (*TLE*) XXIII-4: 22-24. My83

Krause, Robert. "WELS Lutheran High Schools: A Brief History." (*TLE*) XVIII-4: 22-23. My78

Meyer, F.W. "The Lutheran School Bulletin 1930-1940." (*LSB*) X-4: 3-4. My40

Mischke, Carl. "Grace 125 and Christian Education." (*TLE*) XV-1: 2-4. O74

Mueller, Wayne. "Wauwatosa Theology: Its Impact on Today's Ministry." (*LL*). VIII-2:4-7 Wi00

Pelzl, David. "Mathematics Education: Past, Present, and Future (Part One)." (*TLE*) XXIX-2: 39-41. D88

Schaller, Adalbert. "F.W. Meyer." (*LSB*) XIX-3: 1-2. F49

Schaller, Adalbert. "Emil Trettin, Executive Secretary, Board of Education." (*LSB*) XIX-4: 1. My49

Sievert, Erich. "Prominent Educators: Spencer." (*LSB*) XVI-4: 3-4. My46

Sitz, A.P. "Roman Education (1)." (*LSB*) XVII-3: 2-4. F47

Sitz, A.P. "Roman Education (2)." (*LSB*) XVII-4: 2-3. My47

Sitz, Herbert. "The Minnesota Plan." (*LSB*) II-1: 2. S31

Sitz, Herbert. "DMLC's Golden Jubilee Celebration." (*LSB*) IV-3: 2. Ap34

Sitz, Herbert. "Anniversary of G. Burk." (*LSB*) XIV-2: 4. D43

Stellwagen, L. "Prominent Educators: Rousseau." (*LSB*) XVI-3: 3-6. F46

Tiefel, James. "Worship Grows Up." (*LL*). VIII-2:28-29 Wi00

Trettin, Emil. "Twentieth Anniversary of the Lutheran School Bulletin." (*LSB*) XX-4: 7. My50

Trettin, Emil. "A Brief Summary of the History of Our

Christian Day Schools." (*LSB*) XXI-1: 1. O50

Trettin, Emil. "Second Annual Workshop for School Visitors." (*LSB*) XXIX-2: 6. D58

Trettin, Emil. "Will You Help." (*LSB*) XXVIII-2: 6-7. D57

Trettin, Emil. "The First School Visitors' Workshop." (*LSB*) XXVIII-4: 6-7. My58

Warnke, Harold. "The Lutheran High School in Our Synod." (*TLE*) I-2: 9-10. D60

Warnke, Harold. "God's Grace in the Story of WELS Area High Schools." (*TLE*) XV-1: 11-14. O74

Wessel, Howard. "Twenty-five Years of Cooperation." (*TLE*) XXIX-4: 91-94. My89

Westendorf, Rolfe. "Helping Hurting Families." (*LL*) VII-1: 15-17. Fa98

Westerhaus, G.A. "Tracing Christian Education in the Early Church (1)." (*LSB*) XIV-1: 1-2. S43

Westerhaus, G.A. "Tracing Christian Education in the Early Church (2)." (*LSB*) XIV-2: 3-4. D43

## History

Albrecht, Carol. "The Missing Link." (*LP*) IX-5: 9-12 Ma/Ju 02

Averbeck, Julia. "Primary Grades Salute the Bicentennial, The." (*TLE*) XVI-3: 7-8. F76

Bassett, Caleb. "World War I and Its Impact on German-Lutheran Education and Religious Freedom in America". XLVI-4: 102-113. M06. (TLE).

Born, Silas. "Our Future is the Past." (*ELS*) I-1:6 Fa97

Fredrich, Edward. "Key Chore of a Key Course in Secondary Social Studies." (*TLE*) IV-2: 9-11. D63

Grunze, Richard. "Church History—Frosted Cake? or Staple Fare?" (*TLE*) XXVI-2: 4-7. D85

Grunze, Richard. "The Bicentennial of the Federal Constitution." (*TLE*) XXVIII-4: 1-4. O87

Hartwig, Theodore. "Teaching About the Past: Its Sameness and Its Otherness." (*TLE*) XVII-4: 2-3. My77

Hartwig, Theodore. "The Christian Understanding of History as Mystery." (*TLE*) XLIII-1: 19-27 O02.

Hartwig, Theodore. "Portrait of a Master Teacher". XLIV-4: 102-109, M04. (TLE).

Jacobson, Gerald. "What Are You Doing, Jean Fritz?" (*TLE*) XVII-2: 19-20. D76

Klatt, H.R. "Book Chat." (*LSB*) II-3: 5. J32

Klatt, H.R. "A First Lesson in 'European Background'." (*LSB*) VI-2: 2-3. D35

Klatt, H.R. "Does Geography Influence History?" (*LSB*) XIX-1: 2-3. O48

Klatt, H.R. "Importance of Teaching World History Background in the Grades." (*LSB*) XVI-4: 5-6. My46

Klatt, H.R. "What's New in Professional Books." (*LSB*) XXI-3: 7-8. F51

Klatt, H.R. "Introduction to the Crusades." (*LSB*) XXVI-1: 4. O55

Kluender, Joel. "Confessors". XLVII-1: 20-23. O06.

- (TLE).
- Kolander, John. "Our World of War." (LP) XI-1: 6-8 Sep/Oct 03.
- Lenz, Mark. "Lessons in Education From the Romans and Greeks." (TLE) XXXV-2: 35 D94
- Lenz, Mark. "Forward (not froward)." (TLE). XL-2: 35 D99
- Loomis, Cheryl. "Obstacles or Opportunities." (TLE). XL-4: 99 My00
- Loomis, Cheryl. "Forward and Back". XLV-1:3. O04. (TLE).
- Mattek, John. "Lessons from the Past". XLV-1:18-23. O04. (TLE).
- Pelzl, Theo. "Una Slim." (LSB) XIX-3: 4-5. F49
- Rank, Benjamin. "Knowledge of Modern American History." (TLE). XLI-3: 91-92 F01
- Sauer, Alfred v. Rohr. "Lutheran Education in the World Today." (LSB) XVIII-3: 2-7. F48
- Schroeder, Morton. "The 'Land of the Free' Series." (LSB) XXII-2: 8-10. D51
- Schroeder, Morton. "Historical Fiction Stimulant Par Excellence." (LSB) XXIII-4: 11-15. My53
- Sitz, Herbert. "Book Chat." (LSB) I-3: 5. n.d.31
- Sitz, Herbert. "Book Reviews." (LSB) II-1: 5-6. S31
- Sitz, Herbert. "The Washington Bicentennial." (LSB) II-3: 3-4. J32
- Stelljes, O.W. "A History Study Unit for Upper Grades." (LSB) X-1: 2-3. S39
- Stindt, A.C. "I Tell You that .... Luke 19:40 (part 1)." (LSB) XI-1: 4-5. S40
- Stindt, A.C. "I Tell You that .... Luke 19:40 (part 2)." (LSB) XI-2: 3-4. D40
- Wulff, Frederick. "Movies as History." (TLE)XXXVIII-4 113-117 My98

## Home

- Aderman, James. "Don't Rob Them of the Privilege." (PCE) I-2: 22-23. Fa89
- Aderman, James. "Do You Really Know Me?" (LP). VII-4:11 Mar/Apr00
- Ahlswede, Eugene. "How About a Family Bible School." (TLE) XXIII-2: 11-13. D82
- Anonymous. "The Queen of Sheba, An Example for Christian Parents." (LSB) VI-3: 8. F36
- Anonymous. "Home and School Training." (LSB) XV-1: 1-2. O44
- Averbeck, Robert. "Family Art Projects." (TLE) XVII-4: 9-10. My77
- Bare, James. "Take it to heart." (LP). VII-4: 4 Mar/Apr00
- Bauer, Jackie. "The Family Merry-go-round." (LP) VI-5: 9 May/June99
- Bauer, Jackie. "Chart Your Course." (LP) III-1: 5. Sep/Oct 95
- Bauer, Jackie. "Ensuring Success." (LP) III-2: 8. Nov/Dec 95
- Bauer, Jackie. "Turn Conflict Into Peace." (LP) III-6: 8. July/Aug 96
- Boeldt, Deb. "The "Growing Season"." (LP) III-5: 6-7. May/June 96
- Bonack, Jeffrey. "The Long Road Back." (LP). VII-5: 6-8 May/June00
- Braun, John. "Dads and Leaders." (LL) VII-2: 14-17 Wi99
- Brenner, John. "School-to-Home Telephone Teaching Service." (LSB) XXVI-3: 7-8. F56
- Buhrke, Rhonda. "Tempest in a Teapot." (LP) VI-2: 12-14 Nov/Dec 98
- Burow, Sharon. "Integrating God's Word Throughout the Curriculum and Into th." (TLE) XXXVII-1: 23-27 O96
- Carpenter, Craig. "A Nice Visit." (LP) VI-3: 16 Jan/Feb 99
- Carpenter, Craig. "Emotion Smorgasbord." (LP). VIII-4: 16 Mar/Apr01
- Carpenter, Craig. "Hand-me-ups." (LP). VII-3:16 Jan/Feb00
- Carpenter, Craig. "Lessons." (LP). VII-4:15 Mar/Apr00
- Carpenter, Craig. "My Vacation." (LP). VIII-3:16 Jan/Feb01
- Carpenter, Craig. "Pets." (LP). VIII-6: 15 July/Aug01
- Carpenter, Craig. "The Driving Lesson." (LP). VIII-5: 16 May/Jun01
- Esmeier, Jim. "Advocates of God's Family." (LL) VII-1: 22-23 Fa98
- Fellers, Jim & Debera. "The Example of Christian Marriage." (LL) VII-7: 3-7 Fa 98
- Fenske, R.A. "God-Given Responsibility to Parents, The." (TLE) VI-4: 2-3. My66
- Freese, John. "Addressing Parental Concerns: Eight Habits of Highly Effective Persons." (TLE) XXXVII-1: 13-19 O96
- Freese, John. "Addressing Parental Concerns: Eight Habits of Highly Effective Persons." (TLE) XXXVII-2: 36-41 D96
- Guentenberg, Wendi. "From Only Child to Older Child." (LP). VIII-5: 8 May/Jun01
- Guentenberg, Wendi. "Telling Your First About Your Second." (LP). VIII-4: 4 Mar/Apr01
- Hartzell, Eric. "Show Me the Blessings!" (LP). VII-4:14-15 Mar/Apr00
- Heiges, William. "Give Children Back." (LL). VIII-3: 8-10 Sp00
- Heiges, William. "Go to Them." (LL) VII-1 24-25 Fa98
- Helwig, Donald. "Home Visitation." (TLE) XIX-4: 8-9. My79
- Ihlenfeldt, Alma. "The Value of Home Contacts for the Primary Teacher's Work." (LSB) XXI-1: 2-5. O50
- Jahns, Thad. "Keep Your Child's Love Tank Filled." (LP). VIII-3:12-13 Jan/Feb01
- Juern, John. "Teacher-Husband-Dad." (TLE) XXI-2: 21-22. D80
- Juern, John. "Birth-order--does it matter?." (LP). VIII-3: 4 Jan/Feb01
- Kastens, Gerald. "Construction Zone: Building Strong Christian Families." (TLE). XL-1: 21-24 O99

- Kastens Gerald. "Family Materials: What Shall We Choose." (*TLE*) XXXI-4: 81-84. My91
- Kastens, Gerald. "A Family-Centered Approach in Ministry to Youth and Children." (*PL*) I-1: 17-18. N92
- Kastens, Gerald. "Family-Based Youth Ministry." (*LL*) VII-1: 8-10 Fa98
- Keup, Louis. "Report-to-Parents Day." (*LSB*) XXII-3: 6. F52
- Koeller, Ardis. "Chores." (*LP*) III-5: 12-13. May/June
- Krause, Richard. "Teaching the Catechism at Home." (*TLE*) XXXV-4: 100-103 My95
- Kremer, Kenneth. "Wellspring: A New Resource for the Spiritual Home." (*PL*) I-2: 48-49 Sp93
- Kremer, Kenneth. "Home Worship." (*LL*) VII-1 26-27 Fa98
- Loeck, Joyce. "Beating Boredom and the Midwinter Blahs." (*LP*) III-3: 4,13. Jan/Feb 96
- Markgraf, Dale. "Home-visits: A First Step in Developing Good Parent/Teacher Communication." (*TLE*) XXX-4: 76-80. My90
- McKenney, Bruce. "Team Ministry—One Pastor's View." (*PL*) I-2: 43-44 Sp93
- Mendell, Rachel. "An Overview of Home Education." (*TLE*). XL-1: 9-11 O99
- Mendell, Rachel. "Home School Support Groups." (*TLE*). XLI-2: 40-42 D00
- Mendell, Rachel. "How Lutheran School Teachers Can Assist Home Schooling Parents." (*TLE*). XL-2: 40-43 D99
- Mendell, Rachel. "The Conference." (*TLE*). XL-4: 122-125 My00
- Mendell, Rachel. "Teaching Shakespeare." (*TLE*). XLI-3: 77-79 F01
- Mendell, Rachel. "Resources for Teachers and Schools." (*TLE*) XLIII-1: 28-31 O02.
- Mendell, Rachel. "Homenetters: A Unique WELS Online Community." (*TLE*) XLIII-3: 120-123 My03.
- Nelson, Jason. "Manners Matter." (*LP*) III-6: 14-15. July/Aug 96
- Nelson, Joel. "Profiles of Ministry: Family Ministry." (*TLE*) XXXV-1: 17-20 O94
- Nelson, Joel. "Anatomy of a Home Visit." (*LL*) X-2: 28-29 Wi 2002
- Paap, Irma. "On the Changing Classroom." (*TLE*) XXX-4: 75. My90
- Parsons, Erik. "First Day of 'Real School'". XLVII-4: 123-125. M07. (*TLE*)
- Payne, David. "Family Ministry and the Lutheran High School." (*PL*) I-3: 34-35 Su93
- Petermann, Kurt. "Family Devotions - The Tie That Binds." (*TLE*) XXII-1: 10-12. O81
- Petermann, Kurt. "School-Hopping." (*TLE*) XXVII-1: 8-10. O86
- Pfotenhauer, Thomas. "Family Altar, The—Let's Revive It." (*TLE*) XV-3: 2-3. F75
- Raabe, John. "Does the Christian Training of the Home, School, Church ...." (*LSB*) XV-4: 1-2. My45
- Roehl, W.Keith. "The Home and Spiritual Renewal." (*PCE*) I-2: 24-25. Fa89
- Rothe, Debbie, Ron Uhlhorn. "Sooo Far Away." (*LP*). VIII-3: 5 Jan/Feb01
- Sawatske, Laurie. "Parent's Day for Sunday School." (*PCE*) II-1: 16. Su90
- Schafer, Stephen. "God's Greenhouse." (*PL*) I-2: 40,44 Sp93
- Schmal, Mary. "Part of the Family." (*LP*) VI-5: 5 May/June99
- Schmeling, Daniel. "Five Lessons From Daniel." (*LP*). VII-3: 4-5 Jan/Feb00
- Schultz, Dennis. "Call For Your Reactions, A." (*TLE*) XXVI-2: 3. D85
- Schultz, Dennis. "With Devotion and a Willing Mind." (*TLE*) XXVII-1: 5-8. O86
- Schulz, Arthur. "A Wholesome Concern." (*TLE*) XXX-3: 51. F90
- Schulz, James. "Easier Than You Think." (*LP*). VII-4:6-8 Mar/Apr00
- Serrahn, Louis. "Christian Child Training (Erziehung)." (*LSB*) IV-2: 1-6. M34
- Spriggs, Martin. "Home Bible Study Groups." (*PCE*) II-1: 6-7. Su90
- Stadler, Richard. "Solo Mission or Team Challenge?" (*PCE*) I-2: 20-21. Fa89
- Stadler, Richard. "Is the Home Supporting Your Sunday School Effort?" (*PCE*) I-3: 40. Wi89
- Stellhorn, A. C. "Home Rehabilitation and the School." (*TLE*) II-3: 20. F62
- Stresman, Kathy. "Man the Lifeline." (*LP*). VIII-3: 7-8 Jan/Feb01
- Wagenknecht, DeLyn. "Love Signs." (*LP*). VII-3:14-15 Jan/Feb 00
- Wandersee, James. "Should You Take a Correspondence Course?" (*TLE*) XXI-3: 20-21. F81
- Wagner, Mark. "Worthy to be Fathers." (*LL*) VII-1: 20-21 Fa98
- Wessel, Howard. "Home-School Cooperation in Remedial Reading." (*TLE*) XI-1: 16-17. O70
- Westendorf, B.J. "The Rehabilitation of the Home." (*LSB*) VII-3: 1-2. F37
- Westendorf, Rolfe. "One Income or Two?" (*TLE*) XXVII-3: 14-16. F87
- Zohar, Susan. "Homeschoolers Have an Agenda." (*TLE*). XLI-1: 20-21 O00

## Humanism

- Ahlswede, Eugene. "Humanist Manifesto II." (*TLE*) XXVI-2: 8-9. D85
- Balge, Richard. "Dangers Inherent in Attending a State School." (*TLE*) XIV-3: 2-4. F74
- Gerlach, Joel. "Myth of a Value-Free System, The." (*TLE*) IX-1: 2-4. O68

- Gerlach, Joel. "Abigail and Hector." (*TLE*) XVI-3: 5-6. F76  
 Grunze, Richard. "Skirting the Edges of Humanism." (*TLE*) XXVIII-1: 19-23. O87  
 Gulczynski, Dennis. "Psychology in the High School." (*TLE*) XVIII-1: 14-16. O77  
 Hochmuth, Robert. "Consider the Alternatives." (*TLE*) IX-3: 5-6. F69  
 Hochmuth, Robert. "Shem, Ham, and Jane." (*TLE*) XIV-2: 2-3. D73  
 Hochmuth, Robert. "Value Clarification Through Moral Dilemma." (*TLE*) XIX-3: 2-4. F79  
 Hochmuth, Robert. "Other End of the Open End, The." (*TLE*) XVIII-3: 2-4. F78  
 Hochmuth, Robert. "Consider the Alternatives." (*TLE*) XXV-4: 7-9. My85

## Hymns

- Ahlswede, Eugene. "Sing, Christian, Sing." (*TLE*) XXVII-3: 1-2. F87  
 Albrecht, Martin. "Attention—Organists!." (*TLE*) I-1: 14-15. O60  
 Albrecht, Martin. "Choosing Proper Church Music." (*TLE*) II-2: 14-16. D61  
 Albrecht, Martin. "Our 'Non-Lutheran' Hymns." (*TLE*) IV-2: 18-20. D63  
 Albrecht, Martin. "No, We Do Not Have to Lose Our Lutheran Chorale." (*TLE*) IX-1: 21-23. O68  
 Albrecht, Martin. "How Luther's Doctrine is Depicted in His Hymns (1)." (*TLE*) VI-2: 20-22. D65  
 Albrecht, Martin. "How Luther's Doctrine is Depicted in His Hymns (2)." (*TLE*) VI-3: 16-18. F66  
 Albrecht, Martin. "How Luther's Doctrine is Depicted in His Hymns (3)." (*TLE*) VII-1: 22-24. O66  
 Albrecht, Martin. "Teaching Children to Appreciate Luther's Hymns." (*TLE*) VII-4: 14-16. My67  
 Albrecht, Martin. "Music—a Gift of God?" (*TLE*) VIII-2: 16-18. D67  
 Albrecht, Martin. "Is Your Music Improving?" (*TLE*) XII-2: 20-22. D71  
 Albrecht, Martin. "Uniformity in the Playing of Our Hymns." (*TLE*) XIII-1: 20-22. O72  
 Albrecht, Martin. "Lutheran Composers." (*LSB*) XIX-1: 4. O48  
 Albrecht, Martin. "Lutheran Composers (19th Century)." (*LSB*) XIX-3: 6-7. F49  
 Albrecht, Martin. "To What Extent Can ... Church Modes Be Recognized in Chorale." (*LSB*) XV-1: 3. O44  
 Albrecht, Martin. "Musicians of the Lutheran Church." (*LSB*) XVII-3: 4-5. F47  
 Albrecht, Martin. "Lutheran Composers of the 17th Century." (*LSB*) XVIII-1: 5-6. O47  
 Albrecht, Martin. "Lutheran Composers of the 17th Century." (*LSB*) XVIII-3: 7. F48  
 Albrecht, Martin. "Lutheran Composers (19th-20th Century)." (*LSB*) XX-1: 4. O49  
 Albrecht, Martin. "Our Hymnological Heritage." (*TLE*) XXIII-4: 19-21. My83  
 Anderson, Ames. "Service Playing: The Hymn Intonation." (*TLE*) XVI-1: 14-17. O75  
 Anonymous. "Bringing the Lutheran Heritage to Our Children." (*TLE*) VII-2: 14-15. D66  
 Backer, Bruce. "The Message of the Reformation in Luther's Hymn: From Depth.." (*TLE*) XXIII-3: 15-18. F83  
 Backer, Emil. "Chorale and Hymn Playing." (*TLE*) XI-4: 17-19. My71  
 Backer, Emil. "Lutheran Composers." (*LSB*) XIX-2: 3-4. D48  
 Backer, Emil. "Lutheran Composers." (*LSB*) XIX-4: 3. My49  
 Backer, Emil. "Musicians of the Lutheran Church." (*LSB*) XVII-1: 5-6. O46  
 Backer, Emil. "Musicians of the Lutheran Church." (*LSB*) XVII-4: 6-7. My47  
 Backer, Emil. "Lutheran Composers of the 17th Century." (*LSB*) XVIII-2: 5-6. D47  
 Backer, Emil. "Lutheran Composers (Bach)." (*LSB*) XVIII-4: 4-5. My48  
 Backer, Emil. "Composers of the Lutheran Church (Reuter)." (*LSB*) XX-2: 4-5. D49  
 Backer, Emil. "Chorale and Hymn Playing." (*LSB*) XXIV-2: 3-4. D53  
 Becker, Siegbert. "I Walk in Danger All the Way." (*TLE*) V-4: 2-3. My65  
 Bode, Steve. "Introducing the Lutheran Hymnal ca 1941." (*PL*) II-1: 4-5,9 Fa93  
 Eggert, Kurt. "Using Hymns in Your Societies." (*TLE*) I-4: 15-17. D61  
 Eggert, Kurt. "Using Hymns in Your Societies." (*TLE*) XIX-3: 8-10. F79  
 Falck, Karla. "Teaching the Trinity in the Primary Grades." (*TLE*) IX-3: 7-8. F69  
 Franzmann, Martin. "Theology Must Sing." (*PL*) II-3: 14-15 Su94  
 Gerlach, Bryan. "Questions about Christian Worship (1)." (*PL*) IV-2: 46-47 Sp96  
 Gieschen, Waldemar. "Knuckles in a Christmas Hymn." (*TLE*) IV-2: 2-3. D63  
 Grasby, James. "A Brief History of Hymnals Used in WELS Congregations." (*TLE*) XXII-3: 8-11. F82  
 Grasby, James. "A Brief History of Hymnals Used in WELS Congregations." (*TLE*) XXII-4: 16-18. My82  
 Jeske, Mark. "Using the Hymnal as a Teaching Tool." (*TLE*) XXIII-4: 15-18. My83  
 Meyer, Edward. "Challenge of Teaching Music in Contemporary American Culture." (*TLE*) XIX-3: 17-19. F79  
 Meyer, Edward. "Exciting Times in Church Music." (*TLE*) XXIV-1: 9-11. O83

- Meyer, Edward. "Sing a Song of Salvation." (*TLE*) XXIV-4: 11-14. My84
- Meyer, Edward. "Using the Resources That are There: Creating a Concertato." (*TLE*) XXV-1: 13-18. O84
- Meyer, Edward. "Quotations from Twenty-Five Years of TLE Music Articles." (*TLE*) XXV-4: 12-15. My85
- Oswald, H.C. "Studies in Lutheran Chorales: Non-Lutheran Chorales." (*TLE*) I-1: 16-17. O60
- Oswald, H.C. "Studies in Lutheran Chorals (Luther)." (*LSB*) XIX-1: 4-5. O48
- Oswald, H.C. "Studies in Lutheran Chorals (Luther)." (*LSB*) XIX-2: 4-5. D48
- Oswald, H.C. "Studies in Lutheran Chorals (Luther)." (*LSB*) XIX-3: 7-8. F49
- Oswald, H.C. "Studies in Lutheran Chorals (Luther)." (*LSB*) XIX-4: 3-5. My49
- Oswald, H.C. "Studies in Lutheran Chorals (Luther 1)." (*LSB*) XVIII-1: 2-3. O47
- Oswald, H.C. "Studies in Lutheran Chorals (Luther 2)." (*LSB*) XVIII-2: 3. D47
- Oswald, H.C. "Studies in the Lutheran Chorals (Luther 3)." (*LSB*) XVIII-3: 2. F48
- Oswald, H.C. "Studies in Lutheran Chorals (Contemporaries of Luther 1)." (*LSB*) XVIII-4: 3. My48
- Oswald, H.C. "Studies in Lutheran Chorales." (*LSB*) XX-1: 4. O49
- Oswald, H.C. "Studies in Lutheran Chorales." (*LSB*) XX-2: 5-6. D49
- Oswald, H.C. "Studies in Lutheran Chorales." (*LSB*) XX-3: 4. F50
- Oswald, H.C. "Studies in the Lutheran Chorale." (*LSB*) XX-4: 5-6. My50
- Oswald, H.C. "Studies in Lutheran Chorales." (*LSB*) XXI-2: 4-5. D50
- Oswald, H.C. "Studies in Lutheran Chorales." (*LSB*) XXI-3: 6-7. F51
- Oswald, H.C. "Studies in the Lutheran Chorale." (*LSB*) XXI-4: 7-8. My51
- Oswald, H.C. "Studies in Lutheran Chorales." (*LSB*) XXIII-1: 3-4. O52
- Oswald, H.C. "Studies in Lutheran Chorales." (*LSB*) XXIII-2: 2. D52
- Oswald, H.C. "Studies in Lutheran Chorales." (*LSB*) XXIII-3: 2-3. F53
- Oswald, H.C. "Studies in Lutheran Chorales." (*LSB*) XXIV-1: 4,11. O53
- Oswald, H.C. "Studies in Lutheran Chorales." (*LSB*) XXIV-2: 2-3. D53
- Oswald, H.C. "Studies in Lutheran Chorales." (*LSB*) XXIV-3: 2-3. F54
- Oswald, H.C. "Studies in Lutheran Chorales." (*LSB*) XXIX-2: 1. D58
- Oswald, H.C. "Studies in Lutheran Chorales." (*LSB*) XXIX-3: 2-3. F59
- Oswald, H.C. "Studies in Lutheran Chorales." (*LSB*) XXV-2: 2-3. D54
- Oswald, H.C. "Studies in Lutheran Chorales." (*LSB*) XXV-3: 2-3. F55
- Oswald, H.C. "Studies in Lutheran Chorales." (*LSB*) XXV-4: 2-3. My55
- Oswald, H.C. "Studies in Lutheran Chorales (Gerhardt)." (*LSB*) XXVI-1: 2. O55
- Oswald, H.C. "Studies in Lutheran Chorales (Gerhardt)." (*LSB*) XXVI-2: 3. D55
- Oswald, H.C. "Studies in Lutheran Chorales." (*LSB*) XXVI-3: 2. F56
- Oswald, H.C. "Studies in Lutheran Chorales (Gerhardt)." (*LSB*) XXVI-4: 4. My56
- Oswald, H.C. "Studies in Lutheran Chorales (Gerhardt)." (*LSB*) XXVII-1: 3. O56
- Oswald, H.C. "Studies in Lutheran Chorales (Gerhardt)." (*LSB*) XXVII-2: 2-3. D56
- Oswald, H.C. "Studies in Lutheran Chorales." (*LSB*) XXVII-3: 2-3. F57
- Oswald, H.C. "Studies in Lutheran Chorales." (*LSB*) XXVII-4: 3. My57
- Oswald, H.C. "Studies in Lutheran Chorales (Gerhardt)." (*LSB*) XXVIII-1: 2. O57
- Oswald, H.C. "Studies in Lutheran Chorales." (*LSB*) XXVI-II-2: 1. D57
- Oswald, H.C. "Studies in Lutheran Chorales (Gerhardt)." (*LSB*) XXVIII-3: 1-2. F58
- Oswald, H.C. "Studies in Lutheran Chorales (Gerhardt)." (*LSB*) XXVIII-4: 2-3. My58
- Oswald, H.C. "Studies in Lutheran Chorales." (*LSB*) XXX-1: 2-3. O59
- Oswald, H.C. "Studies in Lutheran Chorales." (*LSB*) XXX-2: 2-3. D59
- Oswald, H.C. "Studies in Lutheran Chorales." (*LSB*) XXX-3: 4. F60
- Oswald, H.C. "Studies in Lutheran Chorales." (*LSB*) XXX-4: 2-3. My60
- Prange, Peter. "Don't Forget the Dessert." (*LL*) XII-3: 18-19 Sp04.
- Ring, Alex. "That the Unlearned be Taught." (*ELS*) I-1:5 Fa97
- Ring, Alex. "That the Unlearned be Taught (2)." (*ELS*) I-3:7 Su98
- Ring, Alex. "That the Unlearned be Taught (3)." (*ELS*) V: 5 Sp99
- Ring, Alex. "Using the Hymnal in the Classroom." (*ELS*). VII:7 Sp/Su2000
- Schaefer, James. "Christian Worship and the Common Man." (*PL*) II-1: 10 Fa93
- Schmeling, Daniel. "Sing (and Write) Unto Him a New Song." (*TLE*) XIX-1: 10-12. O78
- Schubkegel, Francis. "Service Playing—Hymn Accompaniments." (*TLE*) XVI-2: 13-15. D75
- Schuetze, Margot. "Practical Suggestions on the Teaching of Hymns." (*LSB*) XXVI-1: 5-7. O55

- Schuetze, Margot. "Teaching a Hymn." (*LSB*) XXVI-3: 2-4. F56
- Sitz, Herbert. "How About Singing?" (*LSB*) I-3: 3. n.d.31
- Tank, James. "Luther's Music and Hymns." (*TLE*) VII-2: 8-11. D66
- Tiefel, James. "Unity in Our Worship Life." (*PL*) II-1: 6-7 Fa93
- Tiefel, James. "Cautious Optimism about Christian Worship." (*PL*) II-1: 8-9 Fa93
- Tiefel, James. "Hymns Nobody Likes." (*PL*) IV-2: 48-49 Sp96
- Timm, E.W. "Hymn Study." (*LSB*) X-3: 4-5. F40
- Timm, E.W. "Helping Our Students to Appreciate Hymns." (*LSB*) XIV-2: 4-5. D43
- Zahn, Meilahn. "Why the Great Neglect?" (*TLE*) V-2: 16-18. D64

### Individualization

- Averbeck, Robert. "Personalized Approach to Spelling, A." (*TLE*) XI-1: 11-12. O70
- Kriewall, Thomas. "Auto-Instructional Devices." (*TLE*) III-4: 8-9. My63
- Schultz, John. "Planning for Individualized Learning." (*TLE*) XIV-4: 15-16. My74
- Schultz, John. "Recognizing Individualized Curricula." (*TLE*) XV-1: 15-17. O74
- Schultz, John. "Instructional Procedures in Individualized Learning." (*TLE*) XV-3: 8-10. F75
- Schultz, John. "Organizational Considerations for Individualized Learning." (*TLE*) XV-4: 11-13. My75
- Wessel, Howard. "Individualizing Reading-A Possibility in Multi-grade Classroom." (*TLE*) XI-3: 11-12. F71
- Willems, Paul L. "OBE and Me: What is OBE?" (*TLE*) XXXIII-1: 12-15. O92

### Inservice

- Franzmann, Werner. "An Order of Service for a Conference of Pastors/Teachers." (*TLE*) XXVII-2: 18-21. D86
- Gieschen, Paul. "What Should the Teacher Read?" (*LSB*) VI-2: 5-6. D35
- Johne, Harold. "Professional Growth — The Wondrous Dimension." (*TLE*) XXIII-4: 2-3. My83
- Knippel, Darrell. "Practical Suggestions for Faculty In-Service Programs." (*TLE*) XVI-2: 8-10. D75
- Knippel, Darrell. "Practical Suggestions for Faculty In-Service Programs." (*TLE*) XVI-3: 11-13. F76
- Kolander, John. "Continuing Education: No Longer an Option for Lutheran Educators." (*TLE*). XL-2: 48-51 D99
- Loomis, Cheryl. "Summer Renewal." (*TLE*) XXXIX-4: 99 M99
- Manthey, W.H. "Professional Growth of the CDS Teacher: A Duty & a Necessity." (*LSB*) V-4: 2. Mr35

- Manthey, W.H. "Are You Present?" (*LSB*) XIII-3: 5-6. F43
- Meyer, F.W. "The Close of the School Year." (*LSB*) XII-4: 3. My42
- Meyer, F.W. "What Shall We Talk About?" (*LSB*) XIII-1: 1-2. S42
- Oswald, Kurt. "Professional Libraries in Our Schools." (*TLE*) I-4: 13-14. D61
- Raabe, John. "Sunday School Teacher's Institute, The." (*TLE*) II-3: 16-17. F62
- Ruege, Paul. "Your Sunday School Teachers Meeting—A Golden Opportunity." (*TLE*) VIII-3: 12-14. F68
- Tullberg, Helen. "What a Sunday School Teacher Expects from Teachers Meetings." (*TLE*) II-2: 19-20. D61
- Warnke, Harold. "In-Service Training Course." (*TLE*) II-2: 10. D61
- Willems, Paul. "Teachers as Learners." (*TLE*) XXXVI-2: 41-43 D95
- Zink, Waldemar. "Sunday School Conferences." (*TLE*) XII-1: 16-17. O71

### Instruction

- Ahlswede, Eugene. "So You've Received a Call." (*TLE*) XXI-3: 2-4. F81
- Bucholz, Esther. "Wir Sprechen Deutsch." (*TLE*) II-3: 4-5. F62
- Ehlke, Lorna. "Saga of the Round Tables." (*TLE*) XX-1: 13-14. O79
- Hagedorn, Grace. "Nail it Down." (*TLE*) XIX-3: 11-12. F79
- Hagedorn, Grace. "Twenty-one Reasons Why I Teach." (*TLE*) XVIII-2: 15-16. D77
- Jacobson, Gerald. "Cheap But Helpful." (*TLE*) XIII-2: 16-18. D72
- Klein, Elsa. "Hello...Goodbye, Miss Young." (*TLE*) XIII-1: 4-5. O72
- Knief, Marilyn. "Don't Wait Your Turn to Learn." (*TLE*) XIV-2: 7-8. D73
- Krueger, William. "Master Teacher's Purpose, The." (*TLE*) VI-4: 21-22. My66
- Leinwander, Bernice. "Experienced Primary Teacher Begins Another Year, The." (*TLE*) IX-1: 8. O68
- Paap, Irma. "Motivating with Christian Love and Kindness." (*TLE*) XXVI-2: 1-3. D85
- Quandt, Lillian. "Reading Readiness." (*TLE*) I-3: 4-5. F61
- Raabe, James. "Teaching the Liturgy." (*TLE*) VI-2: 8-9. D65
- Raabe, James. "Teaching the Liturgy: Laying the Foundation." (*TLE*) VI-3: 4-5. F66
- Raabe, James. "Teaching the Liturgy: Building the Structure." (*TLE*) VII-1: 7-8. O66
- Raabe, James. "Teaching the Liturgy: Continuing to Build." (*TLE*) VII-2: 12-13. D66
- Ruege, Paul. "Teaching the Way the Master Taught." (*TLE*) V-1: 10-15. O64
- Sauer, David. "Inexperienced Teacher and the New School

- Year, The." (*TLE*) IX-1: 9. O68
- Schaefer, James. "Instructing the Adult." (*TLE*) XI-4: 14-16. My71
- Schultz, John. "Instructional Procedures in Individualized Learning." (*TLE*) XV-3: 8-10. F75
- Schulz, Arthur. "In Pursuit of Excellence." (*TLE*) IV-3: 7-9. F64
- Sievert, Ada. "Reflections." (*TLE*) II-1: 4-5. O61
- Sievert, Erich. "Teacher Learned Me." (*TLE*) III-3: 6-8. F63
- Wessel, Howard. "Objective Observation of Teaching Behavior." (*TLE*) XIV-1: 12-13. O73
- Wichmann, W.F. "What Do I Get Out of It?" (*TLE*) III-1: 2-3. O62
- Zehms, Elmer. "Teach Them Simply." (*TLE*) III-2: 13-14. D62

## Kindergarten

- Arndt, Emanuel. "Book Review: The Christian Kindergarten." (*LSB*) XXV-4: 11-12. My55
- Arndt, Ruth. "Teaching God's Little Ones." (*TLE*) VIII-4: 4-5. My68
- Arndt, Ruth. "Disciplining Jesus' Little Lambs." (*TLE*) XIII-4: 8-9. My73
- Averbeck, Julia. "Parent Involvement in the Kindergarten." (*TLE*) XI-4: 5-6. My71
- Bauer, Jackie. "Is She Ready to Start School?" (*LP*) IV-6: 9 July/Aug 1997
- Davis, Lyndee. "Emergency." (*LP*) XI-1: 32 Sep/Oct 03.
- Ferch, Dawn. "Kindergarten Readiness Testing." (*TLE*) XXXVI-2: 36-40 D95
- Galley, Virginia. "A Day in the Kindergarten." (*LSB*) IX-1: 3. S38
- Haar, Beverlee. "Pre-Math Experiences." (*TLE*) XXVIII-3: 69-70. F88
- Hagedorn, Ada. "Kindergarten Workshop, The." (*TLE*) VIII-1: 6-7. O67
- Kassulke, Lorraine. "The Value of a Kindergarten in Our Schools." (*LSB*) XXVII-3: 4-11. F57
- Loppnow, L and L. S. Collyard. "Full-day v. Half-day Kindergarten." (*LP*). VIII-4: 15 Mar/Apr01
- Madson, Margaret. "Reading in Kindergarten." (*TLE*) XV-3: 4-5. F75
- Mahnke, Lee. "Wonderful World of Kindergarten, The." (*TLE*) III-1: 4-5. O62
- Manthey, Irene. "Social Studies in the Kindergarten." (*TLE*) I-4: 8-9. My61
- Marten, Kathleen. "Have You Tried This?" (*TLE*) XV-1: 10. O74
- Moldenhauer, Jeanne. "Kindergarten in the Multi-Grade Classroom." (*TLE*) XV-4: 6-7. My75
- Palmtag, Gertrude. "The Fires of Christmas." (*TLE*) XXIX-2: 47-48. D88
- Schallhorn, B. "What Can We Expect of Children Entering First Grade From Kn." (*LSB*) XIX-3: 3. F49
- Schlueter, Viola. "How I Did It (1)." (*LSB*) XXI-2: 6-7. D50
- Sonntag, Dorothy. "Learning Centers in the Kindergarten." (*TLE*) XVII-2: 7-8. D76
- Thaldorf, Jerald Mrs. "Mother's Thoughts As Her Child Enters Kindergarten, A." (*TLE*) XI-1: 9-10. O70
- Zarling, Irene. "Goals of Achievement in the Kindergartens of Our Lutheran School." (*LSB*) XI-3: 5-6. F41

## Language Arts

- Averbeck, Robert. "Poetry for Enjoyment." (*TLE*) XIV-4: 5-7. My74
- Averbeck, Robert. "Possibilities with Pantomime." (*TLE*) XV-3: 6-7. F75
- Averbeck, Robert. "Take Time for Writing." (*TLE*) XVII-3: 12-13. F77
- Bailey, Darleen. "Primary Language Arts." (*TLE*) III-3: 4-5. F63
- Bucholz, Esther. "Wir Sprechen Deutsch." (*TLE*) II-3: 4-5. F62
- Czer, Larry. "Education 599: Writing Across the Curriculum." (*TLE*) XXX-3: 52-55. F90
- Dorn, Howard. "A School Newspaper: A Means to Purposeful Teaching." (*TLE*) V-1: 6-7. O64
- Ehlke, Lorna. "Penciled By Young Writers." (*TLE*) XXIV-1: 20-21. O83
- Ehlke, Lorna. "Poetic Primaries." (*TLE*) XXV-4: 15-17. My85
- Eickmann, Paul. "In Plain Words." (*TLE*) I-4: 3. My61
- Enter, Sandra & Christine Rau. "Shurley English Program". XLV-2: 57-59. D04. (*TLE*).
- Franzmann, Werner. "She Hollered Me Across the Street." (*TLE*) II-4: 21-22. My62
- Franzmann, Werner. "It was Him Who I Saw." (*TLE*) III-1: 19-20. O62
- Franzmann, Werner. "I Mustof done it Accidentaly—It's only Your Mother Tongue.." (*TLE*) III-2: 17-18. D62
- Franzmann, Werner. "Vereh Clevah, Meh Deah! Pompositios of Speech and Related P?" (*TLE*) III-3: 19-21. F63
- Franzmann, Werner. "Yeah, We Done Two Themes In Our Senior Year." (*TLE*) III-4: 20-21. My63
- Gentz, Marlene. "Speech and Dramatics Are Not Frills." (*TLE*) XV-4: 8-10. My75
- Hamisch, Marguerite. "Manuscript Writing." (*TLE*) V-2: 4-5. D64
- Hasley, Karen. "Drama, the Psalter, and the Classroom." (*TLE*) XIX-3: 13-14. F79
- Hasley, Karen. "Drama and the Psalms." (*TLE*) XX-2: 15-16. D79
- Heidtke, Doris. "Newsflash." (*TLE*) XI-3: 9-10. F71
- Holzheuter, Ruby. "Composition in the Primary Grades." (*LSB*) XV-4: 3-4. My45
- Jacobson, Gerald. "Web of African Tales, The." (*TLE*) XVIII-2: 20-22. D77

- Jantz, Arvin. "Is Good Penmanship Important Today?" (*ILE*) II-4: 6-7. My62
- Larsen, Elizabeth. "Adding a Floor to the Bird House: A Model for ... Composition." (*ILE*) XXI-2: 17-20. D80
- Lober, Arnold. "How to Teach Poetry." (*LSB*) XII-3: 3-4. Mr42
- Manthey, Frederick. "Educational Influence of Journalism." (*ILE*) IX-2: 10-11. D68
- Manthey, Frederick. "Improving Our Gift of Speech." (*ILE*) IX-3: 11-12. F69
- Martin, G. "Grammar in the Grades." (*LSB*) XIII-2: 5-6. D42
- Menk, Roland. "Authentic Assessment in the Language Arts." (*ILE*) XXXV-2: 36-39 D94
- Menk, Roland. "Whole Language—An Overview." (*ILE*) XXXII-1: 15-21. O91
- Middendorf, John. "What is a Sentence?" (*ILE*) IV-1: 21. O63
- Petermann, Kurt. "Bible—A Language Arts Tool, The." (*ILE*) XXI-4: 10-11. My81
- Price, Jame. "Comparing Two Methods of Instruction: Traditional Grammar and the Writing Workshop (1)." (*ILE*) XXXIX-3: 80-85 F99
- Price, Jame. "Comparing Two Methods of Instruction: Traditional Grammar and the Writing Workshop (2)." (*ILE*) XXXIX-4: 100-109 M99
- Schaller, Ruth. "A Suggestion for Language Work in the Primary Grades." (*LSB*) IX-1: 3-4. S38
- Schlueter, Viola. "How I Did It (2)." (*LSB*) XXI-3: 2-4. F51
- Schmeling, Daniel. "Language Curriculum and Communicating the Gospel." (*ILE*) XXI-1: 10-11. O80
- Schulz, Arthur. "What is New in Professional Books." (*LSB*) XXIII-1: 4. O52
- Sievert, Erich. "The Good English Series." (*LSB*) XXIII-2: 4. D52
- Sievert, Hertha. "The Miracle of Speech." (*ILE*) IV-3: 4. F64
- Sitz, Herbert. "Book Chat." (*LSB*) III-1: 6. O32
- Staab, William. "But This Isn't English Class." (*ILE*) XXV-1: 8-9. O84
- Stindt, A.C. "The Pupil's Vocabulary." (*LSB*) I-2: 2-3. n.d.30
- Stone, Rue. "Winged Writing: The Need to Teach Poetry in the Elementary School Classroom." (*ILE*) XXX-3: 56-57. F90
- Tacke, Rachel. "Jesus Talk." (*LP*) VI-2: 10-11 Nov/Dec98
- Wessel, Howard. "Listening—A Neglected Skill." (*ILE*) X-1: 5-6. O69
- Zimmerman, Donald. "My Diary." (*ILE*) XXVI-1: 20. O85

## Law and Gospel

- Bilitz, Rose. "Classroom Conflicts=Teachable Moments." (*ILE*) XXXVI-3: 68-70 F96
- Bitter, Alan. "Levels of Sanctification: Accepting and Encouraging." (*ILE*) XXXII-2: 50-58. D91

- Bitter, Mark. "Color Them Forgiven." (*LP*) IX-4: 14-15 Ma/Ap 02
- Fischer, William. "Moralizing—The Confusion of Law and Gospel When Teaching Children. (1)." (*ILE*) XVII-1: 2-6. O76
- Fischer, William. "Moralizing—The Confusion of Law and Gospel When Teaching Children. (2)." (*ILE*) XXVII-3: 18-22. F87
- Gerlach, Joel. "Smile, God Loves You." (*ILE*) XVI-4: 2-3. My76
- Gerlach, Joel. "Pressure of Persuasion." (*ILE*) XVII-2: 5-6. D76
- Grunze, Richard. "Why So Few Fruits of the Spirit?" (*ILE*) XV-3: 22-24. F75
- Grunze, Richard. "Moses Struck a Rock." (*ILE*) XXV-2: 2-5. D84
- Hellermann, William. "Dangers of Moralizing in the Training of Children." (*LSB*) XI-1: 1-3. S40
- Hellermann, William. "Training Children to Find Pleasure in Their Faith-Life." (*LSB*) XXVIII-3: 2-5. F58
- Hochmuth, Robert. "Evangelical—Loosely Speaking." (*ILE*) XX-3: 2-4. F80
- Kieta, Geoffrey. "Our Daily Struggle With Sin." (*ILE*) XXXVII-4: 100-106 M97
- Kieta, Geoffrey. "WELS Words: Legalism." (*ILE*) XLII-4:125-128 My01
- LaGrow, George. "A Parent's Dilemma: Law or Gospel." (*LP*) VI:1 12-13 Sep/Oct98
- Loeck, Joyce. "Teaching Faith in Action." (*ILE*) XXXIV-2: 57-61 D93
- Mahnke, Jon. "Never Forget the Gospel." (*PCE*) I-2: 30. Fa89
- Mueller, Wayne. "If Not Moralizing, What." (*PL*) II-1: 40-41 Fa93
- Mulinix, Michael. "Being Good and Doing Good." (*ILE*) XXIX-2: 33-38. D88
- Ricke, Mark. "Guilt is a Good Thing." (*LP*) IX-3: 10-12 Jan/Feb 02
- Rupprecht, Jonathan. "What's Wrong With 'What's Wrong With It?'" (*ILE*) XXXV-1: 12-15 O94
- Scharf, Erwin. "The Distinction Between Chastisement and Punishment (1)." (*LSB*) XVII-1: 1-3. O46
- Scharf, Erwin. "The Distinction Between Chastisement and Punishment (2)." (*LSB*) XVII-2: 1-4. D46
- Werner, F.A. "Gospel Integrates, The." (*ILE*) III-3: 2-3. F63
- Wietzke, W.H. "Old Adam—Improved or Crucified?" (*ILE*) III-4: 2-5. My63
- Willems, Paul. "What's Wrong With It?" (*ILE*) XXXIV-4: 104-106 My94
- Willems, Paul. "Paul Willems Responds." (*ILE*) XXXV-1: 16 O94

## Leadership

- Baacke, Linda. "Focus Your Ministry." (*LL*) V-4:21-22 Su97

Baumler, Gary. "Remember to Keep Going." (LL). VIII-2:18-19 Wi00

Becker, Bruce. "Leaders are Born and Made." (LL) X-4:32 Su02

Becker, Bruce. "Leadership: Learning When to Say When." (LL) X-2: 32 Wi02

Becker, Bruce. "Leadership: Using Your Staff." (LL) X-3:32 Sp02

Becker, Bruce. "Leadership: Service with a Smile." (LL) XI-1: 32 Fa02.

Becker, Bruce. "Leadership: Out in Front to Get Behind." (LL) XI-2: 32 Wi03.

Becker, Bruce. "Leadership: We're Not in Kansas Anymore." (LL) XI-3: 32 Sp03.

Becker, Bruce. "Leadership: Expecting the Best." (LL) XI-4: 32 Su03.

Becker, Bruce. "Leadership: Preaching the Gospel." (LL) XII-1: 32 Fa03.

Becker, Bruce. "Leadership: A Vocation from God." (LL) XII-2: 32 Wi04.

Becker, Bruce. "Leadership: Opening Up a New World." (LL) XII-3: 32 Sp04.

Becker, Bruce. "Leadership: Being the Church." (LL) XII-4: 32 Su04.

Becker, Bruce. "Leadership: Mining the Resources". XIII-1: 30 Fa04. (LL).

Becker, Bruce. "Leadership: Leaders Love to Lead Love. XIII-2 32 Wi05. (LL).

Bowe, Keith. "Principals: Overseers Who Serve." (LL) X-4:24-25 Su02

Braun, John. "Just Get Started." (LL). VII-4: 14-17 Su99

Braun, John. "Joy in a Long Race." (LL)V-2:814-17 Wi97

Braun, John. "Leadership-Lutheran Style." (LL) VII-2: 26-27 Wi99

Braun, John. "Servant of Others: An Interview on Leadership." (LL) X-4:4-11 Su02

Braun, John. "Dear Lord, Forgive Me." (LL) XII-1: 8-10 Fa03.

Ehlert, Leon. "Ascending Leadership Mountain." (LP) X-4: 28-29 Ma/Ap 03.

Ferch, Dawn. "Leadership Style = Leadership Beliefs." (TLE). XL-1: 7-8 O99

Gostchock, Scott. "Leadership for a New Era." (TLE). XL-3: 77-82 F00

Heinitz, Brian. "Worship Leaders are Educators." (LL) X-4:22-23 Su02

Heins, Ron. "Managing Conflict." (LL) X:1 8-10 Fa01

Hirons, Roger. "Leadership Development." (LL) X-4:18-19 Su02

Miller, John. "Calm and Hope Beyond the Storm." (LP) VI-5: 6-8 May/June99

Mueller, Wayne. "Leadership: Risk." (LL) VII-2: 32 Wi99

Mueller, Wayne. Leadership: Look Both Ways, (LL)V-1:32 Fa97

Mueller, Wayne. "Leadership: Adding and Subtracting" (LL)V-2:31 Wi97

Mueller, Wayne. "Leadership: Plundering the Egyptians." (LL)V-3:30 Sp97

Mueller, Wayne. "Leadership: One Master." (LL)V-4:32 Su97

Mueller, Wayne. "Leadership: The Media." (LL)VI-1:32 Fa97

Mueller, Wayne. "Leadership: Tying the Bible to the Budget." (LL)VI-2:32 Wi98

Mueller, Wayne. "Leadership: Top-Down Love." (LL) VI-6:32 Su98

Mueller, Wayne. "Leadership: Able to Be Wrong." (LL)VI-3:32 Sp98

Mueller, Wayne. "Leadership: Come as a Child." (LL). VIII-3: 32 Sp00

Mueller, Wayne. "Leadership: Defeating the Amalekites." (LL). IX-1: 32 Fall00

Mueller, Wayne. "Leadership: Forward in Christ." (LL). VIII-2:32 Wi00

Mueller, Wayne. "Leadership: No Fast Hands." (LL). VII-3: 31 Sp99

Mueller, Wayne. "Leadership: The driver's Seat." (LL). IX-3:32 Sp01

Mueller, Wayne. "Leadership: The Youth Culture." (LL). IX-2:32 Win01

Mueller, Wayne. "Leadership: Willing Worship." (LL). VIII-1: 32 Fa99

Mueller, Wayne. "Leadership:Protect or Pass." (LL). VII-4: 32 Su99

Mueller, Wayne. "The Last Shall be First." (LL). VIII-4: 32 Su00

Mueller, Wayne. "Leadership: Back to the Future." (LL) X:1 32 Fa01 Leadership

Mueller, Wayne. "Leadership: Pointing the Weapon." (LL) IX-4:32 Su01

Nelson, Jason. "Leading to Consensus." (LL) X:1 4-7 Fa01

Nelson, Joel. "Time to Climb." (LL) X-4:26-27 Su02

Patterson, Donald. "Leadership: Leading Your Own Family." (LL) X-4:12-14 Su02

Raabe, Daryl. "Not As I Will." (LL) XII-2: 10-12 Wi04.

Raasch, Charles. "Training Youth to Lead." (LL) X-4:28-29 Su02

## Listening

Averbeck, Robert. "Focus on Listening." (TLE) X-1: 7-9. O69

Deltgen, Gail. "Listening." (TLE) XXXV-1: 26-27 O94

Leyrer, Philip. "Conversation: The Gentle Art." (LP) X-6: 24 Ju/Au 03.

Manthey, Frederick. "Improving Our Gift of Speech." (TLE) IX-3: 11-12. F69

Wessel, Howard. "Listening—A Neglected Skill." (TLE) X-1: 5-6. O69

Yahnke, Beverly. "Top Ten Ways to Guarantee Shallow Listening." (LP). VIII-1: 8-9 Sep/Oct00

## Literature

- Anonymous. "Test Supplement: Book Report on 'The Christmas Carol.'" (*LSB*) I-3: 6. n.d.31
- Arndt, Emanuel. "A Suggested List of Books for Your School Library." (*TLE*) II-1: 16-18. O61
- Arndt, Emanuel. "Open Sesame." (*LSB*) XIV-4: 5-6. My44
- Arndt, Emanuel. "What is New in Professional Books." (*LSB*) XIX-3: 5. F49
- Averbeck, Robert. "Revitalizing the Book Report." (*TLE*) VII-3: 6-7. F67
- Bierwagen, Bertha. "Mom, May I Have 25 Cents?" (*TLE*) VIII-2: 4-5. D67
- Czer, Ramona. "If Only More Teachers Were Poets." (*TLE*) XXXV-1: 21-22 O94
- Czer, Ramona. "When Harry Met Dick, Jane, and Sally." (*TLE*). XL-2: 58-64 D99
- Grabitske, Patricia. "A New Team on the Block—Teachers and Technology." (*TLE*) XXXVI-4: 122-124 M96
- Haehlke, Lora. "A Device for Stimulating Interest in Reading Library Books." (*LSB*) XXII-3: 5-6. F52
- Hasley, Karen. "Putting Hobbits to Work." (*TLE*) XVII-1: 14-15. O76
- Hennig, James. "Annual Book Fair." (*TLE*) XVII-2: 23-24. D76
- Ihlenfeldt, H.O. "Helps for the Study of Evangeline." (*LSB*) VIII-2: 5-6. S37
- Jacobson, Gerald. "New Ideas for 'Kiddy Lit.'" (*TLE*) XV-2: 21-23. D74
- Jacobson, Gerald. "What Are You Doing, Jean Fritz?" (*TLE*) XVII-2: 19-20. D76
- Jacobson, Gerald. "Fantastic Journeys of George MacDonald." (*TLE*) XVIII-1: 20-22. O77
- Jacobson, Gerald. "Web of African Tales, The." (*TLE*) XVIII-2: 20-22. D77
- Jacobson, Gerald. "Literature Propaganda Censorship." (*TLE*) XVIII-4: 19-21. My78
- Jacobson, Gerald. "Know Your Writers." (*TLE*) XX-2: 20-21. D79
- Jacobson, Gerald + Zimmermann. "The Relationships of Adolescent Literature." (*TLE*) XXXVI-2: 57-59 D95
- Kiessling, Elmer. "Lutheran High School Teacher's Approach to Literature, The." (*TLE*) III-3: 8-10. F63
- Komschlies, Jacqui. "Where's the Warning Label for Harry Potter?" (*LP*). VIII-2: 6-8 Nov/Dec00
- Kramer, Paul. "Symbolism in Literature." (*TLE*) XI-1: 24. O70
- Seidel, Gene. "Help! I Can't Hear You." (*LL*) X-3:28-29 Sp02
- Mendell, Rachel. "Teaching Shakespeare." (*TLE*). XLI-3: 77-79 F01
- Oswald, Kurt. "Professional Libraries in Our Schools." (*TLE*) I-4: 13-14. D61
- Oswald, Kurt. "Books for the Teachers." (*TLE*) II-3: 18-19. F62
- Radloff, Leslie. "Connecting Children and Books." (*TLE*) XXX-1: 7-11. O89
- Riggs, Roger. "Let's Look at the Paperbacks." (*TLE*) I-4: 12-13. D61
- Ring, Alex. "That the Unlearned be Taught (3)." (*ELS*) V: 5 Sp99
- Schroeder, David. "You Are an Awakener: Literature in the Classroom." (*TLE*) XXXI-1: 19-24. O90
- Schroeder, E.M. "The Role of the School Library." (*LSB*) XVIII-1: 3-5. O47
- Schroeder, Morton. "To Read or Not to Read." (*LSB*) XIX-4: 2-3. My49
- Schroeder, Morton. "Landmark Books: A Significant Contribution to Child Lit (1)." (*LSB*) XXI-4: 8-10. My51
- Schroeder, Morton. "Landmark Books: A Significant Contribution to Child Lit (2)." (*LSB*) XXII-4: 9-10. My52
- Schroeder, Morton. "Author, the Teacher, and the Miner, The." (*TLE*) XXVI-3: 18-21. F86
- Schroeder, Morton. "Current Trends in Children's Literature." (*LSB*) XXVIII-2: 1-5. D57
- Schulz, Arthur. "Tasted - Swallowed - Chewed - Digested." (*TLE*) V-4: 22-23. My65
- Schulz, Arthur. "Sing Out For Books." (*TLE*) VI-2: 10-11. D65
- Schulz, Arthur. "A Year to Note." (*TLE*) XXIX-3: 51. F89
- Schulz, Arthur. "Two New Read-aloud Book Awards". XLVI-4: 114-117. M06. (*TLE*).
- Schweppe, Carl. "A Few Comments on Literature in Our Schools." (*LSB*) X-3: 3-4. F40
- Schweppe, Carl. "Few Comments on Literature in Our Schools, A." (*TLE*) XI-2: 16-18. D70
- Sievert, Erich. "How to Interest Children in Outside Reading." (*LSB*) XV-1: 3-4. O44
- Sitz, Herbert. "The Use of the School Library." (*LSB*) I-3: 1. n.d.31
- Sitz, Herbert. "The School Library." (*LSB*) II-1: 3-5. S31
- Sitz, Herbert. "The School Library." (*LSB*) II-2: 3. N31
- Sitz, Herbert. "Book Selection in Our High School Libraries." (*TLE*) IV-3: 10-11. F64
- Sitz, Herbert. "Book Chat." (*LSB*) IV-3: 3-4. Ap34
- Sitz, Herbert. "A Study Unit on the Vision of Sir Launfal." (*LSB*) IX-4: 4-5. My39
- Sitz, Herbert. "Suggestions for the High School Library." (*TLE*) V-2: 10-12. D64
- Sitz, Herbert. "Of Books and Things." (*TLE*) VII-3: 19-20. F67
- Sitz, Herbert. "Book Reviews by Children." (*TLE*) XI-3: 18-19. F71
- Sitz, Herbert. "The Functions of Literature in the Schools (1)." (*LSB*) XX-1: 2-4. O49
- Sitz, Herbert. "The Functions of Literature in the Schools (2)." (*LSB*) XX-2: 3-4. D49
- Sitz, Herbert. "The Functions of Literature in the Schools (3)." (*LSB*) XX-3: 3-4. F50
- Sitz, Herbert. "The Functions of Literature in the Schools

(4)." (*LSB*) XX-4: 4-5. My50

Stone, Rue. "Winged Writing: The Need to Teach Poetry in the Elementary School Classroom." (*TLE*) XXX-3: 56-57. F90

Teske, Mel. "Art Imitating Life." (*LP*) X-1: 24 Sep/Oct 02

Yarbrough, Kristine. "United We Stand." (*TLE*) XXXV-1: 23-24 O94

Zimmerman, Natalie + Jacobson. "The Relationships of Adolescent Literature." (*TLE*) XXXVI-2: 57-59 D95

## Liturgy

Albrecht, Martin. "Becoming Acquainted With the Church Year." (*TLE*) III-1: 16-18. O62

Albrecht, Martin. "Do You Appreciate and Understand Your Church Service?" (*TLE*) VII-3: 16-18. F67

Arndt, Emanuel. "Book Review." (*LSB*) XXVIII-2: 5-6. D57

Backer, Bruce. "Accompanying the Liturgy." (*TLE*) XVI-3: 20-22. F76

Backer, Bruce. "Let the Glory of the Lord Dwell Richly Among Our Children." (*LSB*) XXIX-4: 1-6. My59

Gerlach, Bryan. "Communicating Baptism's Power." (*PL*) I-2: 15-16 Sp93

Gerlach, Bryan. "Greater Joy in Communion." (*LL*) XI-1: 20-21 Fa02.

Kellogg, Timothy. "Becoming Liturgical." (*LL*) V-1: 18-20 Fa97

Raabe, James. "Teaching the Liturgy." (*TLE*) VI-2: 8-9. D65

Raabe, James. "Teaching the Liturgy: Laying the Foundation." (*TLE*) VI-3: 4-5. F66

Raabe, James. "Teaching the Liturgy: Building the Structure." (*TLE*) VII-1: 7-8. O66

Raabe, James. "Teaching the Liturgy: Continuing to Build." (*TLE*) VII-2: 12-13. D66

Ring, Alex. "That the Unlearned be Taught." (*ELS*) I-1: 5 Fa97

Ring, Alex. "That the Unlearned be Taught (2)." (*ELS*) I-3: 7 Su98

Ring, Alex. "That the Unlearned be Taught (3)." (*ELS*) V: 5 Sp99

## Martin Luther

A.W. (tran. by William Schink). "One Hundred Years Ago." (*TLE*) XVI-3: 2-4. F76

Ahlswede, Eugene. "A Birthday Worth Remembering." (*TLE*) XXIII-1: 2-3. O82

Ahlswede, Eugene. "Luther's Commitment to Christian Education." (*TLE*) XXIII-1: 3-5. O82

Ahlswede, Eugene. "Luther's Love for Children." (*TLE*) XXIII-3: 2-5. F83

Ahlswede, Eugene. "The Large Catechism of Dr. Martin Luther." (*TLE*) XXIV-1: 2-4. O83

Albrecht, Martin. "How Luther's Doctrine is Depicted in His Hymns (1)." (*TLE*) VI-2: 20-22. D65

Albrecht, Martin. "How Luther's Doctrine is Depicted in His Hymns (2)." (*TLE*) VI-3: 16-18. F66

Albrecht, Martin. "How Luther's Doctrine is Depicted in His Hymns (3)." (*TLE*) VII-1: 22-24. O66

Albrecht, Martin. "Teaching Children to Appreciate Luther's Hymns." (*TLE*) VII-4: 14-16. My67

Albrecht, Martin. "Music—a Gift of God?" (*TLE*) VIII-2: 16-18. D67

Anonymous. "Luther Books for Elementary School Libraries." (*TLE*) XXIII-3: 20-22. F83

Anonymous. "Luther Books: A Passel of Informal Reviews." (*TLE*) XXIII-4: 3-5. My83

Arndt, Emanuel. "Book Review." (*LSB*) XXIX-1: 7-8. O58

Backer, Bruce. "The Message of the Reformation in Luther's Hymn: From Depth.." (*TLE*) XXIII-3: 15-18. F83

Bartling, Mark. "Who Was Martin Luther?" (*TLE*) XXIII-3: 18-19. F83

Bauer, Gerhard. "Observing the Reformation in Our Schools." (*TLE*) II-4: 8-9. My62

Brick, Delmar. "Wittenberg—The Luther City." (*TLE*) VIII-3: 17-19. F68

Gieschen, Waldemar. "Knuckles in a Christmas Hymn." (*TLE*) IV-2: 2-3. D63

Gieschen, Waldemar. "Vignettes From Luther For Christmas." (*LSB*) XXVI-2: 1-3. D55

Grunze, Richard. "Catechism Lessons." (*TLE*) XXI-4: 23-24. My81

Habermann, Elwood. "Piercing the Confusion." (*TLE*) IV-1: 2-3. O63

Hagedorn, Grace. "Martin Luther." (*TLE*) XXIII-3: 12-14. F83

Hartwig, Theodore. "Luther, Faithful Servant of Holy Scripture". XLVII-1: 23-29. O06. (*TLE*).

Hermanson, Roger. "Importance of Music Education, The." (*TLE*) XXI-3: 15-17. F81

Hochmuth, Robert. "Turks, Wars, and Floods." (*TLE*) XIX-4: 2-4. My79

Jacobson, Gerald. "Luther: An Enduring Influence on Education." (*TLE*) XIX-3: 20-22. F79

Jeske, Mark. "Happy Birthday, Dr. Luther." (*TLE*) XXIII-3: 5-7. F83

Kiecker, James. "What Do You Do for a Living." (*LL*) XII-2: 4-8 Wi04. Martin

Kiessling, Elmer. "With Luther in the Classroom at Christmas." (*TLE*) V-2: 2-3. D64

Kiessling, Elmer. "Luther and Christian Education (1)." (*LSB*) XXVII-1: 3-4. O56

Kiessling, Elmer. "Luther and Christian Education (2)." (*LSB*) XXVII-2: 3-4. D56

Kiessling, Elmer. "Luther and Christian Education (3)." (*LSB*) XXVII-3: 3-4. F57

Kiessling, Elmer. "Luther and Christian Education." (*LSB*) XXVII-4: 3-4. My57

Koelpin, Arnold. "Luther, As Father and Teacher (1)." (*PL*)

- III-2: 4-9 Sp95
- Koelpin, Arnold. "Luther, as Teacher (2)." (*PL*) III-3: 4-7, 11 Su95
- Koelpin, Arnold. "The Dual Role: Luther, as Educator (3)." (*PL*) IV-1: 4-8 Fa95
- Koelpin, Arnold. "Luther Lands — Then and Now." (*TLE*) XXIII-3: 8-11. F83
- Koelpin, Arnold. "Luther's Wittenberg." (*TLE*) XXIII-4: 22-24. My83
- Lenz, Mark. "Luther's Lesser Known Theses". XLVII-2: 40-44. D06. (*TLE*).
- Oswald, H.C. "Studies in Lutheran Chorals (Luther)." (*LSB*) XIX-1: 4-5. O48
- Oswald, H.C. "Studies in Lutheran Chorals (Luther)." (*LSB*) XIX-2: 4-5. D48
- Oswald, H.C. "Studies in Lutheran Chorals (Luther)." (*LSB*) XIX-3: 7-8. F49
- Oswald, H.C. "Studies in Lutheran Chorals (Luther)." (*LSB*) XIX-4: 3-5. My49
- Oswald, H.C. "Studies in Lutheran Chorals (Luther 1)." (*LSB*) XVIII-1: 2-3. O47
- Oswald, H.C. "Studies in Lutheran Chorals (Luther 2)." (*LSB*) XVIII-2: 3. D47
- Oswald, H.C. "Studies in the Lutheran Chorals (Luther 3)." (*LSB*) XVIII-3: 2. F48
- Petermann, Kurt. "Reformation Projects." (*TLE*) XXIII-2: 2-4. D82
- Petermann, Kurt. "Up Periscope! What's Happening?" (*TLE*) XXIII-4: 6-8. My83
- Russow, Howard. "How Luther Stressed the Importance of Christian Training." (*TLE*) VII-4: 2-3. My67
- Sievert, Adelia. "Luther in the Primary Grades." (*TLE*) VII-4: 12-13. My67
- Tank, James. "Luther's Music and Hymns." (*TLE*) VII-2: 8-11. D66

## Materials

- Averbeck, Robert. "Learning Center Activities." (*TLE*) XVI-1: 7-8. O75
- Averbeck, Robert. "Resources for Teaching Art." (*TLE*) XXVIII-4: 6-9. O87
- Barnes, Glenn. "Use of Visual Aids with Rear Projection." (*TLE*) IV-1: 10-11. O63
- Braun, Mark. "God So Loved the World — A Review." (*TLE*) XXII-4: 5-7. My82
- Brodbeck, Michael. "Instructional Media-Listening Centers." (*TLE*) XIX-4: 12-13. My79
- Bunnow, David. "Television, Video, and the Local Congregation." (*TLE*) XXIV-3: 10-11. F84
- DMLC Library Staff. "Helpful Gadgets: Some Clever Teaching Aids." (*TLE*) XIX-2: 21-23. D78
- Fischer, William. "Cradled in His Arms' Some Questions and Answers." (*TLE*) XXVI-1: 5-6. O85
- Hagedorn, Grace. "Cast Thy Bread upon the Waters." (*TLE*) XXI-2: 10-11. D80
- Heckmann, George. "Role of the Unit Method in Teaching Social Studies." (*TLE*) IV-2: 5-6. D63
- Jacobson, Gerald. "Cheap But Helpful." (*TLE*) XIII-2: 16-18. D72
- Lanphear, Gerald. "Try the Newspaper." (*TLE*) XVI-4: 7-9. My76
- Lanphear, Joan. "Making More Use of the Overhead Projector." (*TLE*) XVII-3: 10-11. F77
- Micheel, John. "Computer Resources." (*TLE*) XXIII-4: 10-12. My83
- Paap, Irma. "Practical Teaching Aids for Teaching the Story of God's Love." (*TLE*) XVII-1: 20-22. O76
- Paulsen, John. "Resources for Teaching Mathematics." (*TLE*) XIII-4: 12-13. My73
- Pelzl, Theo. "Lost: A Picture." (*LSB*) VI-3: 4. F36
- Rolloff, E. O. "Effective Use of the Basic Teaching Film, The." (*TLE*) I-4: 10-11. D61
- Schroeder, Marlyn. "Problems of Rural Sunday Schools." (*TLE*) I-3: 20-21. F61
- Schultz, John. "Organizational Considerations for Individualized Learning." (*TLE*) XV-4: 11-13. My75
- Sonntag, Dorothy. "Learning Centers in the Kindergarten." (*TLE*) XVII-2: 7-8. D76
- Wagner, Wayne. "Teaching Music With Ten Thumbs." (*TLE*) XXIII-1: 9-11. O82

## Meditation

- Ahlswede, Eugene. "Prayer Power." (*TLE*) XXVII-1: 1. O86
- Anonymous. "Sacrifice." (*LSB*) II-4: 1. Mr32
- Anonymous. "Let All Things be Done With Charity." (*LSB*) VIII-1: 1. S37
- Bliefernicht, E.R. "For the Next Schoolyear." (*LSB*) II-1: 1. S31
- Brenner, John. "Let Us Now Go Even Unto Bethlehem." (*LSB*) XXX-2: 1-2. D59
- Brick, Delmar. "Be Strong and of Good Courage." (*LSB*) XXVI-3: 1-2. F56
- Ellenberger, Larry. "Preserve the Foundation." (*TLE*) XXI-1: 1. O80
- Ellenberger, Larry. "A Great Light." (*TLE*) XXI-2: 1. D80
- Ellenberger, Larry. "Don't Forget Your Coat." (*TLE*) XXI-3: 1. F81
- Ellenberger, Larry. "Remembering Our Baptism." (*TLE*) XXI-4: 1. My81
- Ellenberger, Larry. "Bearing the Cross." (*TLE*) XXII-1: 1. O81
- Ellenberger, Larry. "Bethlehem and Beyond." (*TLE*) XXII-2: 1. D81
- Ellenberger, Larry. "Fools for Christ." (*TLE*) XXII-3: 1. F82
- Ellenberger, Larry. "More Than Conquerors." (*TLE*) XXII-4: 1. My82
- Ellenberger, Larry. "The Attitude of Gratitude." (*TLE*) XXIII-1: 1. O82

- Ellenberger, Larry. "Christmas at the Luther Home." (*TLE*) XXIII-2: 1. D82
- Ellenberger, Larry. "Thanks for Luther — The Educator." (*TLE*) XXIII-3: 1. F83
- Ellenberger, Larry. "Luther as Father." (*TLE*) XXIII-4: 1. My83
- Franzmann, Werner. "Glory to the New-Born King—Born of the Virgin Mary." (*LSB*) XVII-2: 1. D46
- Gehrke, Ralph. "Lenten Meditation." (*LSB*) XXV-3: 1-2. F55
- Gentz, A.A. "The Little Bottle of Salt." (*LSB*) XXIV-4: 1-2. My54
- Gieschen, Henry. "School Sermon." (*LSB*) XX-4: 1-3. My50
- Grummert, Donald. "Your Christmas Joy." (*LSB*) XXVII-2: 1-2. D56
- Harstad, A.L. "One Room — One Faith." (*TLE*) XX-1: 1. O79
- Hoenecke, Gerald. "The Christchild and Our Children." (*LSB*) XX-2: 1-2. D49
- Hoepner, Walter. "From Suffering to Easter Joy." (*LSB*) XXVII-3: 1-2. F57
- Janke, Richard. "Peace." (*LSB*) XIII-2: 1-2. D42
- Jeske, John. "Jochebed and You." (*TLE*) I-1: 1. O60
- Jeske, John. "Our Duty Toward Mother Eve's Children." (*TLE*) I-2: 1. D60
- Jeske, John. "What Manner of Love!." (*TLE*) I-3: 1. F61
- Jeske, John. "What Kind of Workmen are We?" (*TLE*) I-4: 1. My61
- Jeske, John. "Let Down Your Net Anyway!." (*TLE*) II-1: 1. O61
- Jeske, John. "Thy Speech Bewrayeth Thee." (*TLE*) II-3: 1. F62
- Jeske, John. "The Savior Wants Your Donkey." (*TLE*) II-4: 1. My62
- Keibel, Armin. "Teachers Worth Twice as Much." (*TLE*) III-1: 1. O62
- Keibel, Armin. "The Good Spell." (*TLE*) III-2: 1. D62
- Keibel, Armin. "Resort to Gethsemane." (*TLE*) III-3: 1. F63
- Keibel, Armin. "Parting Blessing." (*TLE*) III-4: 1. My63
- Keibel, Armin. "Parable for Pedagogues." (*TLE*) IV-1: 1. O63
- Keibel, Armin. "Advent Stewards." (*TLE*) IV-2: 1. D63
- Keibel, Armin. "Patrick the Sinner." (*TLE*) IV-3: 1. F64
- Keibel, Armin. "Fishers of Men." (*TLE*) IV-4: 1. My64
- Keibel, Armin. "Honor Your Predecessor." (*TLE*) IX-1: 1. O68
- Keibel, Armin. "Counselor." (*TLE*) IX-2: 1. D68
- Keibel, Armin. "The Greater Emancipator." (*TLE*) IX-3: 1. F69
- Keibel, Armin. "Jesus' Next of Kin." (*TLE*) IX-4: 1. My69
- Keibel, Armin. "Call Me Christian." (*TLE*) V-1: 1. O64
- Keibel, Armin. "Wise Men." (*TLE*) V-2: 1. D64
- Keibel, Armin. "Abide With Us." (*TLE*) V-4: 1. My65
- Keibel, Armin. "The Big Difference." (*TLE*) VI-1: 1. O65
- Keibel, Armin. "Loyalty to Leaders." (*TLE*) VI-2: 1. D65
- Keibel, Armin. "Being Wise." (*TLE*) VI-3: 1. F66
- Keibel, Armin. "Feed My Lambs." (*TLE*) VI-4: 1. My66
- Keibel, Armin. "Treasured Teacher." (*TLE*) VII-1: 1. O66
- Keibel, Armin. "Angels for a Priest." (*TLE*) VII-2: 1. D66
- Keibel, Armin. "Apollos for Self-Improvement." (*TLE*) VII-3: 1. F67
- Keibel, Armin. "What It Means to be a Lutheran Teacher." (*TLE*) VII-4: 1. My67
- Keibel, Armin. "Grown-Up Teachers." (*TLE*) VIII-1: 1. O67
- Keibel, Armin. "A Child-Like Faith." (*TLE*) VIII-2: 1. D67
- Keibel, Armin. "How Precious the Child in the Sight of the Lord." (*TLE*) VIII-4: 1. My68
- Keibel, Armin. "God's Whole Armor." (*TLE*) X-1: 1. O69
- Keibel, Armin. "Alpha/Omega." (*TLE*) X-2: 1. D69
- Keibel, Armin. "He Has Risen!." (*TLE*) X-3: 1. F70
- Keibel, Armin. "Ichthus." (*TLE*) X-4: 1. My70
- Keibel, Armin. "Tree Stakes." (*TLE*) XI-1: 1. O70
- Keibel, Armin. "The Shepherds' Angel." (*TLE*) XI-2: 1. D70
- Keibel, Armin. "The Celtic Cross." (*TLE*) XI-3: 1. F71
- Keibel, Armin. "Phylacteries." (*TLE*) XI-4: 1. My71
- Keibel, Armin. "Sowing the Seed." (*TLE*) XII-1: 1. O71
- Keibel, Armin. "The Name Above Every Name." (*TLE*) XII-2: 1. D71
- Keibel, Armin. "The Crux of the Cross." (*TLE*) XII-3: 1. F72
- Keibel, Armin. "The Christian Olympics." (*TLE*) XII-4: 1. My72
- Keibel, Armin. "The Beginning of Wisdom." (*TLE*) XIII-1: 1. O72
- Keibel, Armin. "Forbid Them Not!." (*TLE*) XIII-2: 1. D72
- Keibel, Armin. "Gem of the Reformation." (*TLE*) XIII-3: 1. F73
- Keibel, Armin. "Our Teacher the Holy Spirit." (*TLE*) XIII-4: 1. My73
- Keibel, Armin. "It's Not Hereditary." (*TLE*) XIV-1: 1. O73
- Keibel, Armin. "Gold and Frankincense and Myrrh." (*TLE*) XIV-2: 1. D73
- Keibel, Armin. "Never Be Discouraged!." (*TLE*) XIV-3: 1. F74
- Keibel, Armin. "Why Go To a Lutheran High School?" (*TLE*) XIV-4: 1. My74
- Keibel, Armin. "Reformation Angel." (*TLE*) XIX-1: 1. O78
- Keibel, Armin. "Christmas Past, Christmas Present." (*TLE*) XIX-2: 1. D78
- Keibel, Armin. "Does It Show?" (*TLE*) XIX-3: 1. F79
- Keibel, Armin. "Keep the Faith!." (*TLE*) XIX-4: 1. My79
- Keibel, Armin. "God's High Regard for Parenthood." (*TLE*) XV-1: 1. O74
- Keibel, Armin. "New Minds for Old." (*TLE*) XV-2: 1. D74
- Keibel, Armin. "Fit For the Kingdom." (*TLE*) XV-3: 1. F75
- Keibel, Armin. "Jesus' Confirmation Gift." (*TLE*) XV-4: 1. My75

- Keibel, Armin. "Christian Citizens." (*TLE*) XVI-1: 1. O75
- Keibel, Armin. "Jesus' First Recorded Word." (*TLE*) XVI-2: 1. D75
- Keibel, Armin. "Necessity of the Cross." (*TLE*) XVI-3: 1. F76
- Keibel, Armin. "Pass It On!." (*TLE*) XVI-4: 1. My76
- Keibel, Armin. "Wanted, Harvesters." (*TLE*) XVII-1: 1. O76
- Keibel, Armin. "Opening God's Christmas Gift." (*TLE*) XVII-2: 1. O76
- Keibel, Armin. "Faith Alone." (*TLE*) XVII-3: 1. F77
- Keibel, Armin. "The Holy Christian Olive Tree." (*TLE*) XVII-4: 1. My77
- Keibel, Armin. "Run Your Best!." (*TLE*) XVIII-1: 1. O77
- Keibel, Armin. "A Lamp for Our Feed." (*TLE*) XVIII-2: 1. D77
- Keibel, Armin. "Better Than Honey." (*TLE*) XVIII-3: 1. F78
- Keibel, Armin. "75 Years of Lutheran High Schools." (*TLE*) XVIII-4: 1. My78
- Kiessling, Elmer. "A Graduation Address." (*LSB*) XXVII-4: 1-3. My57
- Kraus, Karl. "The Miracle of Love." (*LSB*) XXII-2: 1-2. D51
- Lawrenz, Carl. "Living By God's Christmas Gift." (*LSB*) XV-2: 1-2. D44
- Menke, Normal. "We Beheld His Glory." (*TLE*) II-2: 1. D61
- Meyer, F.W. "Launch Out Into the Deep." (*LSB*) IX-1: 1-2. S38
- Meyer, F.W. "For the New School Year." (*LSB*) VII-1: 2-3. S36
- Meyer, F.W. "The Master Callest For Thee." (*LSB*) X-1: 1-2. S39
- Meyer, F.W. "Be Thou Our Guide." (*LSB*) XII-1: 3. S41
- Meyer, F.W. "A Lesson From Our Times." (*LSB*) XIII-3: 2. F43
- Meyer, F.W. "The Harvest Truly is Great ... Luke 10,2." (*LSB*) XIII-4: 4. My43
- Meyer, F.W. "My Obligation as a Teacher." (*LSB*) XV-1: 2-3. O44
- Meyer, Joh P. "Serving God's Happy People." (*LSB*) XX-1: 1-2. O49
- Naumann, Oscar. "God's Boundless Love, Our Boundless Joy." (*LSB*) XIV-1: 1-2. D43
- Nolting, Paul. "Closing Sermon of Summer Session, 1956." (*LSB*) XXVII-1: 1-2. O56
- Persons, Steven. "The Covered Bridge and the Covered Classroom." (*TLE*) XX-4: 1. My80
- Schaller, Adalbert. "E.G.." (*LSB*) II-2: 1. N31
- Schaller, Adalbert. "A Faithful and Wise Steward." (*LSB*) XXII-1: 1-2. O51
- Schaller, Egbert. "The Failure of Unbelief." (*LSB*) XII-3: 1-2. Mr42
- Schaller, Egbert. "The Wisdom of Little Things." (*LSB*) XXV-4: 1-2. My55
- Scharf, Erwin. "Lent and Easter in the Christian Day School Classroom." (*LSB*) XX-3: 1-2. F50
- Scharf, Erwin. "We Are the Lord's." (*LSB*) XXX-1: 1-2. O59
- Schulz, W.E. "Preach the Word." (*LSB*) XXVI-1: 1-2. O55
- Schwepe, Carl. "Spiritual Depression." (*LSB*) II-3: 1. J32
- Schwepe, Carl. "The Challenge to Education." (*LSB*) III-1: 1-4. O32
- Schwepe, Carl. "1 Kings 10:1-13." (*LSB*) XXVIII-1: 1-2. O57
- Seifert, John. "Jesus, the Unknown King." (*TLE*) XX-2: 1. D79
- Sievert, K. "A Christian Teacher's Sure Foundation." (*LSB*) XIII-3: 1-2. F43
- Sitz, Herbert. "Shall It Be a Depression Christmas?" (*LSB*) III-2: 1. N32
- Sitz, Herbert. "Let Us Build the House." (*LSB*) III-3: 1. F33
- Sitz, Herbert. "Let Us Rise Up and Build." (*LSB*) IV-3: 1. Ap34
- Sitz, Herbert. "A New School Year Begins." (*LSB*) V-1: 1-2. S34
- Sitz, Herbert. "Stand Still and See." (*LSB*) V-2: 1. N34
- Sitz, Herbert. "An Educational Challenge." (*LSB*) V-3: 1. Ja35
- Sitz, Herbert. "On Guard." (*LSB*) V-4: 1. Mr35
- Sitz, Herbert. "We Begin the New School Year." (*LSB*) VI-1: 1. O35
- Stern, T.F. "The Secret of Christian Service." (*LSB*) XXIX-3: 1-2. F59
- Stindt, A.C. "We Do Our Part." (*LSB*) IV-1: 1-2. O33
- Stuebs, Arden. "Faithful is He That Callest You, Who Also Will Do It." (*LSB*) XXX-4: 1-2. My60
- Toepel, Eldor. "The New School Year — With Jesus." (*LSB*) XXIX-1: 1. O58
- Trettin, Emil. "For Ye Know the Grace of our Lord ... 2 Cor 8,9." (*LSB*) X-2: 1-2. D39
- Voecks, Victor. "Is the Delinquency Problem Hopeless?" (*LSB*) XIV-4: 1-2. My44
- Waterstradt, Ronald. "On Being Great in the Kingdom." (*TLE*) XX-3: 1. F80
- Wendland, E.H. "Rejoice in the Lord Always ...." (*LSB*) XXIII-2: 1-2. D52
- Westendorf, S.E. "A Root Out of Dry Ground." (*LSB*) XVI-3: 2-3. F46
- Wichmann, W.F. "Your Life is Hid With Christ in God." (*LSB*) XXV-1: 1-2. O54
- Zimmerman, Fred. "Lent: A Perfect Time to Right Wrong Ideas." (*TLE*) XXIV-3: 1. F84
- Zimmerman, Fred. "He Will Be With Them Also." (*TLE*) XXIV-4: 1. My84
- Zimmerman, Fred. "Train a Child in the Way He Should Go, And When He is Old .." (*TLE*) XXV-1: 1. O84
- Zimmerman, Fred. "Faith—The Most Time-Honored Celebration of Christmas." (*TLE*) XXV-2: 1. D84
- Zimmerman, Fred. "How Jesus Graduated His First

Disciples at His Ascension.” (*TLE*) XXV-4: 2-3. My85  
 Zimmermann, Fred. “Ready for Christmas and Ready for Christ.” (*TLE*) XXIV-2: 1. D83

## Memory Work

Anonymous. “A Symposium.” (*LSB*) VIII-3: 5. F37  
 Arndt, Ruth. “Teacher, What are ‘Flops?’” (*TLE*) XVI-1: 4-6. O75  
 Becker, Bruce. “Stored Power.” (*LL*) VI-2:22-23 Wi98  
 Collyard, Larry. “Teaching Meaningful Memory Work.” (*TLE*) XXXVI-4: 110-115 M96  
 Czer, Ramona. “If My Words Remain in You.” (*PCE*) II-2: 30-31. Fa90  
 Dorn, Owen. “Memory Work of Memory Treasures?” (*TLE*) XXXIX-3: 86-88 F99  
 Fehlauer, Adolph. “Meaningful Memory Work.” (*TLE*) I-3: 9-10. F61  
 Grabitske, Patricia. “Learning: Make It Stick.” (*TLE*) XXXVIII-2:42-45 D97  
 Hagedorn, Grace. “Every Child an Expert.” (*TLE*) XIX-2: 11-12. D78  
 Hartwig, Theodore. “Parents, Teachers, Don’t Shortchange Those Young Memories”. XLIV-1: 6-12. O03. (*TLE*).  
 Isch, John. “Why Memorize?” (*TLE*) XXXI-2: 27. D90  
 Juern, John. “Making Memory Work Easier.” (*LP*) IX-1: 5 Sep/Oct 01  
 Paap, Irma. “Memory Work in the Primary Grades.” (*TLE*) XXXII-2: 44-49. D91  
 Rains, Tina. “Fading memory, but Not Fading Faith.” (*LP*) VI-3: 15 Jan/Feb 99  
 Schmal, Mary. “Teaching Children How to Memorize.” (*PCE*) II-2: 26-27. Fa90  
 Wagner, Mark. “From Tedious to Tremendous.” (*TLE*) XXXII-4: 113-118. My92  
 Worgull, David. “Individual Memory Course.” (*TLE*) XII-3: 15-17. F72

## Methods

Adickes, Robert. “Creation Science Field Trip to the Grand Canyon, A.” (*TLE*) XVI-3: 22-24. F76  
 Ahlswede, Eugene. “God Bless our Native Land.” (*TLE*) XXI-1: 2-4. O80  
 Albrecht, Martin. “Psalter—Hymnbook and Prayer Book, The.” (*TLE*) VI-1: 19-21. O65  
 Albrecht, Martin. “Music Interests and Aptitude of the Child.” (*TLE*) VIII-4: 18-20. My68  
 Anonymous. “Teaching Reading, A Long Range View.” (*TLE*) III-2: 4-5. D62  
 Anonymous. “Bringing the Lutheran Heritage to Our Children.” (*TLE*) VII-2: 14-15. D66  
 Arndt, Emanuel. “What is New in Professional Books.” (*LSB*) XXII-2: 5-6. D51  
 Arndt, Emanuel. “Theories of Learning (1).” (*LSB*) XXIII-

1: 6-7. O52  
 Arndt, Emanuel. “Theories of Learning (2).” (*LSB*) XXIII-2: 6-7. D52  
 Arndt, Emanuel. “Theories of Learning (3).” (*LSB*) XXIII-3: 6-7. F53  
 Arndt, Emanuel. “Theories of Learning (4).” (*LSB*) XXIV-4: 8-9. My54  
 Averbeck, Robert. “Crayon Techniques.” (*TLE*) IV-1: 6-7. O63  
 Averbeck, Robert. “Christian Teacher and His Preparation, The.” (*TLE*) IV-4: 17-18. My64  
 Averbeck, Robert. “Helping Children Appreciate Art.” (*TLE*) VI-3: 6-7. F66  
 Averbeck, Robert. “Posters That Communicate.” (*TLE*) X-2: 6-7. D69  
 Averbeck, Robert. “Personalized Approach to Spelling, A.” (*TLE*) XI-1: 11-12. O70  
 Averbeck, Robert. “Nature Crafts.” (*TLE*) XI-2: 6-7. D70  
 Averbeck, Robert. “Learning Can Be Fun.” (*TLE*) XII-4: 4-6. My72  
 Averbeck, Robert. “Three-Dimensional Art.” (*TLE*) XV-2: 11-12. D74  
 Averbeck, Robert. “Folk Art of America.” (*TLE*) XVI-3: 9-10. F76  
 Averbeck, Robert. “Corner for Art, A.” (*TLE*) XVII-1: 9-10. O76  
 Averbeck, Robert. “Printmaking in All the Grades.” (*TLE*) XVIII-1: 10-11. O77  
 Averbeck, Robert. “Are We Having Art This Week?” (*TLE*) XXVII-1: 18-20. O86  
 Barnes, Glenn. “Productive Thinking Through Questioning.” (*TLE*) XIII-1: 17-19. O72  
 Barnes, Glenn. “Functions of Questions.” (*TLE*) XIII-2: 11-13. D72  
 Bartel, Grace. “Finger Fun.” (*PCE*) II-3: 42-43. Wi90  
 Beckmann, Laurel. “Some Ideas for Your Devotions.” (*TLE*) XXVI-4: 12-14. My86  
 Berg, Linda. “Wanted: More Time.” (*TLE*) XII-3: 4-5. F72  
 Bierwagen, Bertha. “Teaching with Enthusiasm.” (*TLE*) IX-2: 4-5. D68  
 Bitter, Alan. “How Should We Teaching Reading?” (*TLE*) XXXIV-2: 36-43. D93  
 Bitter, Alan. “Alan Bitter Replies.” (*TLE*) XXXIV-4: 113-114 My94  
 Blauert, Karl. “Modern Mathematics in Our Schools.” (*TLE*) VIII-1: 24. O67  
 Born, Silas. “Preparing Tapes for the Instructional Center.” (*TLE*) XI-2: 19-20. D70  
 Braun, Mark. “Making Young People Effective Talkers for Jesus Christ.” (*TLE*) XX-1: 7-9. O79  
 Brenner, John. “School-to-Home Telephone Teaching Service.” (*LSB*) XXVI-3: 7-8. F56  
 Cares, Mark. “Sound the Retreat for Adult Bible Class.” (*TLE*) XXV-4: 18-19. My85  
 Czer, Ramona. “Tending God’s Artists.” (*TLE*) XXX-2: 44-

46. D89
- Czer, Ramona. "The Case for Missing Volunteers." (*TLE*) XXXIV-1: 22-23 O93
- Dallmann, J. E. "Revolutionary New Arithmetic Method." (*TLE*) III-4: 6-7. My63
- Deltgen, Gail. "Cooperative Learning in the High School Classroom." (*TLE*) XXXIII-3: 76-77. F93
- Deltgen, Gail. "Listening." (*TLE*) XXXV-1: 26-27 O94
- Dewalt, Mark. "Using Course Contracts to Engage Students in the Learning Process." (*TLE*) XL-3: 83-86 F00
- Dorn, Howard. "A School Newspaper: A Means to Purposeful Teaching." (*TLE*) V-1: 6-7. O64
- Dorn, Orlan. "Discovery—An Approach to Arithmetic." (*TLE*) IV-2: 7-8. D63
- Drews, Evelyn. "What Can I Do For Art Friday?" (*TLE*) XIV-1: 5-6. O73
- Drews, Evelyn. "Tissue Art Ideas—Plus a Few Others." (*TLE*) XIV-3: 7-9. F74
- Duehlmeier, Margaret. "Ideas Are All Around." (*TLE*) XIV-1: 17-19. O73
- Ebe, Barbara. "Rainy Day Activities in the Classroom." (*LSB*) XXX-2: 6-7. D59
- Ehlke, Lorna. "Bozo, the Busy Puppet." (*TLE*) XII-1: 4-5. O71
- Ehlke, Lorna. "Primaries Explore Their Town." (*TLE*) XII-4: 2-3. My 72
- Ehlke, Lorna. "Saga of the Round Tables." (*TLE*) XX-1: 13-14. O79
- Ehlke, Lorna. "Hi-Ho, The Cherry-O." (*TLE*) XXII-4: 14-16. My82
- Ehlke, Lorna. "What About Santa?" (*TLE*) XXIV-2: 17-19. D83
- Falck, Karla. "Curiosity Centers." (*TLE*) XIII-2: 7-8. D72
- Foelske, Wayne. "Integration of Computers in the Science Classroom." (*TLE*) XXIX-4: 82-90. My89
- Found, Lester. "In Favor of Art for High School Curricula." (*TLE*) XVIII-2: 8-10. D77
- Franzmann, Werner. "It was Him Who I Saw." (*TLE*) III-1: 19-20. O62
- Freese, John, Aimee Gorske, Jennifer Prinsky. "Service-Learning in the Lutheran School Curriculum." (*TLE*) XXXIX-3: 89-93 F99
- Frick, Carol. "Alpha People Bring Fun to Phonics." (*TLE*) XIII-4: 10-11. My73
- Frutiger, Grace. "Work of Thy Fingers, The." (*TLE*) XI-2: 4-5. D70
- Gerlach, Joel. "Let us Pray!" (*TLE*) XIII-2: 2-4. D72
- Glaeser, Gilbert. "The Interrelation of the Lecture and the Dialog Methods." (*LSB*) XVI-4: 4-5. My46
- Glende, Arthur. "Questions with a Purpose." (*TLE*) X-4: 6-7. My70
- Grabitske, Patricia. "Using Cooperative Groups to Promote Accountability." XLIV-2: 52-57. D03. (*TLE*).
- Hagedorn, Grace. "Nail it Down." (*TLE*) XIX-3: 11-12. F79
- Hagedorn, Grace. "Of Peter Rabbit and Teeter-Totters." (*TLE*) XXI-3: 13-14. F81
- Hagedorn, Grace. "Martin Luther." (*TLE*) XXIII-3: 12-14. F83
- Hahn, James. "How Franzmann's Commentary Enriched My Ministry." (*PCE*) III-3: 38-39. Wi91
- Hamisch, Marguerite. "Aim and Values of an Object Lesson." (*LSB*) XVII-3: 5-6. F47
- Hartwig, Theodore. "Teaching About the Past: Its Sameness and Its Otherness." (*TLE*) XVII-4: 2-3. My77
- Hartzell, Luke. "Experiential Learning-Enhancing the Future of Education in our Schools". XLVII-2: 60-64. D06. (*TLE*).
- Hasley, Karen. "Drama, the Psalter, and the Classroom." (*TLE*) XIX-3: 13-14. F79
- Hasley, Karen. "Drama and the Psalms." (*TLE*) XX-2: 15-16. D79
- Heckmann, George. "Teaching Conservation Effectively (1)." (*TLE*) III-1: 8-9. O62
- Heckmann, George. "Teaching Conservation Effectively (2)." (*TLE*) III-2: 8-9. D62
- Heckmann, George. "Role of the Unit Method in Teaching Social Studies." (*TLE*) IV-2: 5-6. D63
- Heidtke, Doris. "Newsflash." (*TLE*) XI-3: 9-10. F71
- Hellermann, William. "Our Backward Pupil (2)." (*TLE*) XII-3: 11-14. F72
- Hellermann, William. "Our Backward Pupil (3)." (*TLE*) XII-4: 10-12. My72
- Henkel, Linda. "Teaching the Word with Puppets." (*PL*) III-1: 26-27 Fa94
- Hunter, Thomas. "Silence Is Not So Golden." (*PL*) IV-1: 47-48 Fa95
- Ihlenfeldt, H.O. "Helps for the Study of Evangeline." (*LSB*) VIII-2: 5-6. S37
- Isch, John. "Explorers." (*TLE*) XVII-3: 14-15. F77
- Isch, John. "Children Teaching Children." (*TLE*) XVII-4: 6-8. My77
- Isch, John. "Mastery Learning." (*TLE*) XVIII-3: 20-22. F78
- Isch, John. "Always Know the Answer(?)." (*TLE*) XXXV-4: 111-112 My95
- Isch, John. "To Group or Not to Group." (*TLE*) XLI-1: 22-29 O00
- Jacobson, Gerald. "Choosing Instructional Materials." (*TLE*) XIII-1: 8-10. O72
- Janke, Philip. "Troubles With Our Youth Groups?" (*TLE*) IX-1: 15-18. O68
- Jeseritz, Rudolph. "Track Meet that's Different, A." (*TLE*) XIX-3: 23-24. F79
- Johannsen, Hans. "35mm Slides in the Classroom." (*TLE*) III-1: 6-7. O62
- Kastens, Gerald. "Life and Bible Times: Finding Freshness." (*PL*) III-1: 24-25 Fa94
- Kelm, Paul. "Don't Babysit Your Youth Group." (*TLE*) XVI-4: 14-16. My76
- Kiessling, Elmer. "Lutheran High School Teacher's

- Approach to Literature, The." (*TLE*) III-3: 8-10. F63
- Kissinger, Mrs. Donald. "St. John's First Graders Learned to Read Via i/t/a." (*TLE*) VII-1: 13-15. O66
- Klockziem, Roger. "Cooperative Learning: An Alternative." (*PL*) I-3: 33,35 Su93
- Klockziem, Roger. "Cooperative Learning." (*TLE*) XXX-4: 87-91. My90
- Klug, Ronald. "Round and Round in Reading." (*TLE*) VI-3: 8-9. F66
- Knief, Marilyn. "Don't Wait Your Turn to Learn." (*TLE*) XIV-2: 7-8. D73
- Kremer, Kenneth. "Survival Quarter (part 1)." (*TLE*) XXV-1: 19-22. O84
- Kremer, Kenneth. "Survival Quarter (part 2)." (*TLE*) XXV-2: 12-16. D84
- Kriewall, Thomas. "The Sum and Substance of Arithmetic." (*TLE*) I-3: 6-8. F61
- Kriewall, Thomas. "Auto-Instructional Devices." (*TLE*) III-4: 8-9. My63
- Kruse, Merlyn. "Critical Behaviors of the Classroom Teacher." (*TLE*) XXIX-1: 13-17. O88
- Lanphear, Gerald. "Teacher's Role In Diagnosing Reading Problems." (*TLE*) XII-4: 7-9. My72
- Lawrenz, John. "Youth Ministry in 4-D." (*TLE*) XVI-3: 17-19. F76
- Manthey, Frederick. "The Teacher Studies the Value of Voluntary and Involuntary Attention." (*LSB*) XVI-2: 3-4. D45
- McLean, Irma. "Instruction: Curriculum Focus of Teacher Choice." (*TLE*) XXXII-4: 99. My92
- Meyer, Edward. "Aids for Teaching Music." (*TLE*) XIII-3: 10-11. F73
- Meyer, Edward. "Teachers Speak on Music in the Upper Grades." (*TLE*) XV-2: 15-18. D74
- Meyer, Edward. "Have You Joined the Kodaly Bandwagon?" (*TLE*) XVII-4: 17-19. M77
- Meyer, Marie. "Listen to the Lesson." (*TLE*) XII-2: 4-5. D71
- Meyer, Marietta. "What Are We Doing About Map Study? (1)." (*TLE*) V-3: 4-5. F65
- Meyer, Marietta. "What Are We Doing About Map Study? (2)." (*TLE*) V-4: 4-5. My65
- Micheel, John. "Computer Literacy." (*TLE*) XXII-3: 2-4. F82
- Middendorf, John. "What is a Sentence?" (*TLE*) IV-1: 21. O63
- Mitchell, Robert. "Description in Science." (*TLE*) XIII-1: 10-11. O72
- Mittelman, Carla. "Homework Fax at Arizona Lutheran Academy." (*PL*) II-3: 30,34 Su94
- Mueller, Jean. "My Phonics Cheerleader." (*TLE*) XI-3: 5-6. F71
- NCTM. "Calculators and the Education of Youth." (*TLE*) XXXV-3: 93-94 F95
- Palmtag, Gertrude. "The Fires of Christmas." (*TLE*) XXIX-2: 47-48. D88
- Paulsen, John. "Computers in Christian Day School?" (*TLE*) XXIII-1: 15-17. O82
- Payne, David. "Seven Tips for Better Discussions." (*PL*) I-2: 27-28 Sp93
- Pelzl, David. "Mathematics Education: Past, Present, and Future (Part One)." (*TLE*) XXIX-2: 39-41. D88
- Pelzl, David. "Mathematics Education: Past, Present, and Future (Part Two)." (*TLE*) XXIX-3: 58-60. F89
- Pelzl, David. "Mathematics Education: Past, Present, and Future (Part Three)." (*TLE*) XXIX-4: 76-78. My89
- Pelzl, David. "Cooperation or Competition." (*TLE*) XXXIV-4: 107 My94
- Pelzl, David. "Cooperation or Singling Out?" (*TLE*) XXXV-1: 25 O94
- Pelzl, Theo. "Suggested Experiments and Projects." (*LSB*) IV-1: 4-5. O33
- Pelzl, Theo. "Lost: A Picture." (*LSB*) VI-3: 4. F36
- Proeber, Kathleen. "Christ's Love Lives in Little Ones (1)." (*TLE*) XXII-1: 8-10. O81
- Proeber, Kathleen. "Christ's Love Lives in Little Ones (2)." (*TLE*) XXII-2: 14-16. D81
- Proeber, Kathleen. "Christ's Love Lives in Little Ones (3)." (*TLE*) XXII-3: 5-6. F82
- Quandt, Lillian. "Let's Make Christmas Gifts." (*TLE*) X-2: 4-5. D69
- Quandt, Lillian + Schmidt. "Useful Art Projects." (*TLE*) V-2: 6-7. D64
- Raasch, Robert. "Principles of Learning: An Overview." (*PCE*) I-1: 6-7. Su89
- Raasch, Robert. "Maintaining Student Interest." (*PCE*) I-2: 31. Fa89
- Raasch, Robert. "Keeping 'em Active." (*PCE*) I-3: 35. Wi89
- Raasch, Robert. "Planned Progression: Key to an Effective Lesson." (*PCE*) I-4: 51. Sp90
- Raasch, Robert. "Let Your Students do the Teaching." (*PCE*) II-1: 3. Su90
- Raasch, Robert. "Lead Your Students Up the Ladder of Learning." (*PCE*) II-2: 19. Fa90
- Raasch, Robert. "Do You Remember?—Teaching Principle #6." (*PCE*) II-3: 35. Wi90
- Raasch, Robert. "Asking the Right Questions." (*PCE*) II-4: 62. Sp91
- Raasch, Robert. "A Taxonomy of Questions: Echoing Questions." (*PCE*) III-1: 16. Su91
- Raasch, Robert. "A Taxonomy of Questions." (*PCE*) III-2: 16. Fa91
- Raasch, Robert. "Evaluating Questions." (*PCE*) III-3: 35. Wi91
- Raether, Carole. "Nature Studies In Winter." (*TLE*) VII-2: 6-7. D66
- Ring, Lester. "Graphic Arts at Our School." (*TLE*) III-1: 10-12. O62
- Rosenau, David L. "VBS Handicraft Coordinator." (*TLE*) XXVII-3: 8-9. F87

- Ruege, Paul. "Teaching the Way the Master Taught." (*TLE*) V-1: 10-15. O64
- Scharf, Erwin. "Lent and Easter in the Christian Day School Classroom." (*TLE*) XVII-3: 2-4. F77
- Scherzer, Robert. "TV or Not TV, That is the ?" (*TLE*) II-1: 6-7. O61
- Scheuerlein, Don. "Teaching Children to Pray." (*TLE*) XXIX-3: 63-68. F89
- Schmeling, Daniel. "Keeping Our Classrooms Current." (*TLE*) XIX-2: 13-14. D78
- Schmidt, Gertrude + Quandt. "Useful Art Projects." (*TLE*) V-2: 6-7. D64
- Schnick, Thomas. "Phonological Training for Reading Teachers." (*TLE*) XXIX-1: 7-9. O88
- Schroeder, David. "Oral History As a Teaching Approach in Secondary Schools." (*TLE*) XXVII-1: 11-14. O86
- Schroeder, Marlyn. "Use of Visual Aids, The." (*TLE*) III-1: 13-15. O62
- Schroeder, Martin. "Not...first...,Nor...last..." (*TLE*) XXXIV-3: 67. F94
- Schuetze, Armin. "Use of Modern Bible Translations in Our Classrooms." (*TLE*) XIII-4: 4-7. My73
- Schulz, Arthur. "Experimental Programs and the Curriculum." (*TLE*) IV-1: 8-9. O63
- Sievert, Erich. "ITA — ARA — TO." (*TLE*) V-4: 8-9. My65
- Sievert, Hertha. "Evaluation Of Our Teaching of Bible Stories, An." (*TLE*) II-2: 4-5. D61
- Sievert, Walter. "Bible Reading in Our Schools." (*TLE*) V-3: 6-7. F65
- Sitz, Carleton. "i/t/a Project in St. John's School, The." (*TLE*) VII-1: 11-12. O66
- Sitz, Herbert. "A School Exhibit." (*LSB*) I-2: 1. n.d.30
- Sitz, Herbert. "No Homework Today!." (*TLE*) XIV-3: 23. F74
- Sonntag, Dorothy. "Learning Centers in the Kindergarten." (*TLE*) XVII-2: 7-8. D76
- Spaude, Naomi. "Speak, Read, Write." (*TLE*) XVII-1: 7-8. O76
- Spurgin, Alan. "Developing a Science Unit with Limited Funds and Facilities." (*TLE*) XVII-2: 11-12. D76
- Staab, William. "But This Isn't English Class." (*TLE*) XXV-1: 8-9. O84
- Stadler, Richard. "Jesus and Socrates in the Youth Program?" (*TLE*) XXI-1: 5-7. O80
- Steele, Loren. "Impact Teaching! Power Teaching With Chalk." (*PCE*) III-1: 10-11. Su91
- Steinbach, Paul. "Using Various Study Guides to Teach Bible History." (*TLE*) XXVIII-4: 82-85. My88
- Steinbach, Paul. "Reading Methods in the WELS." (*TLE*) XXXIV-4: 108-112 My94
- Thiesfeldt, Steven. "The Use of Discrepant Events in Teaching Science." (*TLE*) XXXIV-1: 19-23 O93
- Thiesfeldt, Steven. "The Use of Historical Vignettes in Teaching Science." (*TLE*) XXXIV-3: 90-92. F94
- Thompson, Glen. "Latin Across Three Time Zones." (*TLE*) XXXV-2: 51-53 D94
- Trettin, Emil. "Suggested Rainy Activities." (*LSB*) XXVIII-1: 6-7. O57
- Wagner, Wayne. "Music Education Survey Results." (*TLE*) XXIV-2: 14-17. D83
- Wandersee, James. "Wait Time Research—Can it Help you Teach Science?" (*TLE*) XIX-4: 16-17. My79
- Wandersee, James. "Should You Take a Correspondence Course?" (*TLE*) XXI-3: 20-21. F81
- Wandersee, James. "Let's Take a Science Field Trip!." (*TLE*) XXII-3: 11-13. F82
- Wegner, Walter. "Vasteras for Variety." (*TLE*) I-1: 12-13. O60
- Wendler, David. "The Expectation Map." (*TLE*) XXIX-3: 71. F89
- Wessel, Howard. "Oral Reading by the Teacher." (*TLE*) XIII-4: 14-15. My73
- Wille, Gary. "An Idea that Works." (*PL*) II-2: 12-13 Sp94
- Willems, Paul. "Try Using Rubics." (*TLE*) XXXIV-1: 11-15 O93
- Willems, Paul. "Demonstrating God's Handiwork in His Creation." (*TLE*) XXXV-2: 40-43 D94
- Willems, Paul L. "OBE and Me: What is OBE?" (*TLE*) XXXIII-1: 12-15. O92
- Willems, Paul. "Teaching With Patterns of Poetry." (*TLE*) XLII-4:119-121 My01
- Willems, Paul. "Choices and Decisions". XLIV-1: 29-31. O03. (*TLE*).
- Wobeck, Clyde. "Teaching Responsible Citizenship." (*TLE*) VIII-2: 6-7. D67
- Yarbrough, Kristine. "WELS Teachers Across the Country—Unite!." (*TLE*) XXXIV-2: 62 D93
- Yotter, Harold. "Mathematics Balance: A Useful Manipulative, The." (*TLE*) XVII-1: 23-24. O76
- Zahn, Meilahn. "Is Rhythm the Forgotten Element in Your Classroom?" (*TLE*) X-1: 19-21. O69
- Zimmermann, Walter. "Teaching Children to Speak Out About Christ." (*TLE*) XXIV-3: 2-4. F84

## Ministry

- Ahlswede, Eugene. "So You've Received a Call." (*TLE*) XXI-3: 2-4. F81
- Ahlswede, Eugene. "Don't Be Weird." (*TLE*) XXI-4: 2-4. My81
- Ahlswede, Eugene. "Twelve Month Call, The." (*TLE*) XXIV-4: 2-4. My84
- Ahlswede, Eugene. "Resignations." (*TLE*) XXV-1: 10-12. O84
- Anonymous. "Guidelines for Participating in Social Security by Women Teachers." (*TLE*) XI-2: 21. D70
- Anonymous. "The Ambition to be a Church Worker." (*TLE*) XXX-1: 22-24. O89
- Arnold, Ray. "Prison Ministry at Saginaw." (*PL*) IV-1: 27,32 Fa95

- Balge, Jonathan. "It's Not Yours". XLVII-4: 127-128. M07. (TLE).
- Becker, Bruce. "Expect, Encourage, and Enable." (LL). IX-1: 20-21 Fall00
- Berg, Linda. "The Single Teacher: Serving Singly." (TLE) XXXII-3: 81-84. F92
- Braun, John. "Sow the Seed: An Interview with Carl Mischke." (LL) XI-1: 14-17 Fa02.
- Braun, Mark. "Bible Cells?" (TLE) XX-3: 5-8. F80
- Brutlag, Ron. "Teaming Up." (PL) I-2: 7-8. Sp93
- Buege, Charles. "Who Cares? We Do! ". XIII-1: 28-29 Fa04. (LL).
- Dorn, Owen. "The Single Teacher: Reaching Out to the Single." (TLE) XXXII-3: 84-86. F92
- Eickmann, Paul. "The Liberal Arts in the Education of WELS Ministers." (TLE) XXXI-1: 8-13. O90
- Franzmann, Martin. "Commencement Address." (LSB) XIII-1: 2-4. S42
- Gieschen, Waldemar. "The Delightful Fruits of Our Teaching." (LSB) XXIII-1: 1-3. O52
- Grubbs, Mark. "Recruiting Church Workers in the Area Lutheran High School." (TLE) XXXII-4: 108-112. My92
- Grunze, Richard. "Necessary Choice, A." (TLE) VI-1: 2-4. O65
- Grunze, Richard. "Necessary Choice, A." (TLE) XIV-1: 2-4. O73
- Gurgel, Karl. "Care Committee." (LL). IX-1: 8-10 Fall00
- Haar, Susan; Carla Melendy. "Profiles of Ministry: The East Coast." (TLE) XXXII-4: 123-125. My92
- Habermann, Elwood. "From a Pastor to All Teachers." (TLE) IX-1: 6. O68
- Hagedorn, Grace. "Twenty-one Reasons Why I Teach." (TLE) XVIII-2: 15-16. D77
- Hahnke, Lloyd. "Humble to Serve." (TLE) VII-2: 2-3. D66
- Heidtke, Earl. "Where Will We Get Them?" (PL) I-1: 39-40. N92
- Herman, Edgar. "A Way into Prison." (LL). VII-4: 22-23 Su99
- Hertig, Michael. "Profiles of Ministry: Questions and Answers." (TLE) XXXIII-4: 118-120. My93
- Hintz, Michael. "Completing Our Joy." (LL) XI-1: 26-27 Fa02.
- Hoenecke, Henry. "Have You Considered Prison Ministry." (PL) I-3: 43 Su93
- Horn, Frederick. "Profiles of Ministry: Ministry of Disciplineship." (TLE) XXXIV-1: 24-26 O93
- Isch, John. "The Single Teacher: Similarities & Differences." (TLE) XXXII-3: 80-81. F92
- Isch, John. "Before and After." (TLE) XXXV-1: 3 O94
- Johnson, John. "Handling Stress." (LL). IX-1: 14-17 Fall00
- Juern, John. "Teacher-Husband-Dad." (TLE) XXI-2: 21-22. D80
- Kelm, Paul. "Training Christians for Ministry." (PCE) II-2: 28-29. Fa90
- Kirk, Daniel. "Me—a Pastor?" (TLE) XVIII-3: 23-24. F78
- Koch, Thomas. "Joy in Ministry." (LL) XI-1: 8-10 Fa02.
- Kowalke, E.E. "Commencement Address, Northwestern College." (LSB) XV-4: 2-3. My45
- Krahn, Richard. "Raised From the Dead." (LL) XI-1: 4-7 Fa02.
- Krueger, William. "Master Teacher's Purpose, The." (TLE) VI-4: 21-22. My66
- Laitinen, Wayne. "Help[ an Elephant Tred Water." (LL)V-4:8-9 Su97
- Lenz, Greg. "Parish Nurse Helps Many People." (PL) IV-2: 14-15 Sp96
- Lenz, Mark. "Misfits in the Ministry." (TLE) XXXII-2: 35. D91
- Leyrer, Leyrer. "Pondering a Paradox". XLVII-3: 67. F07. (TLE)..
- Leyrer, Philip. "Me and the Spirit". XLIV-4: 120-122, M04. (TLE).
- Leyrer, Philip. "At the Center". XLV-3: 67. F05. (TLE).
- Leyrer, Philip. "Flag-wrapping". XLVI-4: 99. M06. (TLE).
- Loomis, Cheryl. "Professionalism." (TLE). XLI-4: 99 My01
- McLean, Irma. "Called to Teach...A Unique Calling." (TLE) XXXIII-4: 99. My93
- McLean, Irma. "Teachers: Know Your Students." (TLE) XXXV-4: 99 My95
- Melendy, Carl; Susan Haar. "Profiles of Ministry: The East Coast." (TLE) XXXII-4: 123-125. My92
- Meyer, John. "Profiles of Ministry." (TLE) XXXII-2: 59-61. D91
- Mueller, Wayne. "The Sunday School Teacher's Call." (PCE) II-4: 64. Sp91
- Needham, Dennis. "Profiles of Ministry: The Caribbean." (TLE) XXXII-3: 72-76. F92
- Neimi, David. "Profiles of Ministry: The Inner City." (TLE) XXXII-4: 125-126. My92
- Nelson, Jason. "Stir Them to Action." (TLE) XXX-1: 12-15. O89
- Nelson, Joel. "Profiles of Ministry: Family Ministry." (TLE) XXXV-1: 17-20 O94
- Nelson, Joel. "I Can Still Feel Their Hands." (LL) XII-4: 18-19 Su04.
- Olson, Lawrence. "A Primer of Staff Ministry." (TLE) XXXIV-3: 72-74. F94
- Olson, Lawrence. "Reflections on Team Ministry." (TLE) XXXIX-2: 42-47 D98
- Ott, Randall. "Models of Joy." (LL) XI-1: 18-19 Fa02.
- Plath, LeDell. "Twelve-Month Call for All Teachers." (TLE) XIII-3: 6-9. F73
- Plath, Timothy. "Jack of All Trades: Master of (N)one." (TLE) XXXV-3: 86-88 F95
- Pope, James. "How Faithful Is Faithful". XLVI-2:37. D05. (TLE).
- Raabe, Peg. "For the Sheer Joy." (LL) XI-1: 22-23 Fa02.
- Reim, E. "Is the Teacher's Call Divine?" (LSB) XII-2: 1-2. D41

- Retzlaff, David and Roberta. "I do' to a Called Worker". XLVI-2: 52-54. D05. (TLE).
- Schmidt, Wayne. "Is This My Call?" (TLE) II-2: 3. D61
- Schroer, Gerald. "First Aid." (LL). IX-1: 28-29 Fall00
- Schuetze, Armin. "Inspiring Principles of Education From Inspired Educators (Moses)." (LSB) XIX-1: 1-2. O48
- Schulz, Mark. "... in Prison and You Visited Me." (PL) IV-1: 25-26 Fa95
- Schmeling, Dan. "Uniquely United." (LL) X:1 20-21 Fa01
- Sitz, Herbert. "Editorial." (LSB) VI-4: 3-4. Ap36
- Stuebs, Martin. "What Kind of Person Does God Choose for Service?" (PL) II-1: 36 Fa93
- Voss, Robert. "Encouraging Our Pupils For the Teaching and Preaching Ministry." (TLE) II-3: 10-12. F62
- Werre, Jennifer Meyer. "Profiles in Ministry: The Great Plains." (TLE) XXXIII-3: 93-94. F93
- Westendorf, Rolfe. "One Income or Two?" (TLE) XXVII-3: 14-16. F87
- Wichmann, W.F. "What Do I Get Out of It?" (TLE) III-1: 2-3. O62
- Willems, Paul. "What Can I Get Out of It?" (TLE) XXVI-II-4: 93-94. My88
- Willems, Paul. "Pushing the Envelope." (TLE) XXXIX-1: 10-12 O98
- Willems, Paul. "Service With a Smile." (TLE). XLI-3: 68-69 F01
- Willems, Paul. "People". XLV-2: 38-49. D04. (TLE).
- Woldt, Alfons. "Joy in Ministry." (PL) I-3: 40 Su93
- Woldt, Alfons. "Special Ministries—Getting Involved." (TLE) XVII-3: 5-6. F77
- Zeitler, John. "Ministering to the Institutional Member." (PL) IV-3: 37-38 Su96

## Miscellaneous

- Albrecht, R.M. "Der Deutsche Leseunterricht." (LSB) I-2: 2. n.d.30
- Albrecht, R.M. "Was Soll Man in Den Deutschen Sprechungen Treiben!." (LSB) I-3: 3-4. n.d.31
- Anonymous. "Foreword." (LSB) I-1: 1. N30
- Anonymous. "Ask Me No Questions...." (ELS). VII:5 Sp/Su2000
- Arndt, Emanuel. "Education Digest, The." (TLE) II-4: 19-20. My62
- Bilitz, Jonathan. "One of the Other Nine." (LP) XI-2: 30-31 Nov/Dec 03.
- Bitter, Donald. "Lutheran Mask, The." (TLE) VII-3: 2-3. F67
- Braun, Mark. "Toward Broadened Horizons." (TLE) XXII-3: 17-19. F82
- Carpenter, Craig. "My Theory of Fix-it-ivity." (LP)V-1:16 Sep/Oct 1997
- Carpenter, Craig. "Suffering Produces Home." (LP)V-2:17 Nov/Dec 1997
- Carpenter, Craig. "Fireworks." (LP). VII-6: 16 July/Aug 00
- Carpenter, Craig. "Hands." (LP) IX-6:16 July/Aug02
- Cook, John. "It Takes the Right Village." (LP). VIII-2: 14 Nov/Dec00
- Czer, Ramona. "Divine Details." (TLE) XXXIX-3: 77-79 F99
- Czer, Ramona. "Sisterly Love." (TLE) XXXVII-3: 84-86 F97
- Czer, Ramona. "Sweet Fruits." (TLE) XXXIV-4: 119-120 My94
- Czer, Ramona. "What is Solitude?" (TLE) XXXVII-4: 125-126 M97
- Czer, Ramona. "Gracious Uncertainty." (TLE)XXXVIII-2 50-52 D97
- Czer, Ramona. "Shekinah Words: The Ministry of Creative Discipleship, Part 1." (TLE) XLII-2:59-63 D01
- Fehlauer, Jeanne. "The Eazzy Way to Good Health." (LP). VIII-1: 12-13 Sep/Oct00
- Fehlauer, Jeannie. "Something Wicked this way Comes." (LP). VII-3:10-11 Jan/Feb00
- Fellers, Debera. "Your Personal Spiritual Life." (PCE) II-4: 51-52. Sp91
- Frey, Conrad. "What's the Right Direction." (TLE) XXXV-3: 91-92 F95
- Frey, Conrad. "A Generous Man Will Prosper." (TLE)XXXVIII-4:100-102 My98
- Goede, Ned. "It Makes Me Feel Like Weeping." (LP)V-4:10-11 Mar/April 1998
- Hartwig, Theodore. "A Harrowing Bus Ride". XLIV-4: 113-114, M04. (TLE).
- Heckmann, George. "Archaeology Come to Life." (TLE) XXIV-4: 8-11. My84
- Heier, Otto. "Why the Lutheran Educator." (TLE) I-1: 2-3. O60
- Herman, Edgar. "When You Need a Washing Machine." (LL)VI-1:24-25 Fa97
- Isch, John. "The Owner's Manual." (TLE) XXIX-1: 3. O88
- Isch, John. "Urgent Press Release." (TLE) XXIX-2: 27. D88
- Isch, John. "Nurture." (TLE) XXXI-1: 3. O90
- Juern, John. "A Sense of Learning." (LP) VI-3: 4 Jan/Feb 99
- Isch, John. "The Well-Known Christian." (TLE). XLI-1: 3 O00
- Kieta, Geoffrey. "Why do Terrible Things Happen?" (TLE) XLII-2:44-48 D01
- Kolander, John. "2000 is here now what?" (LP). VII-3:12-13 Jan/Feb00
- Kuehl, David. "Church Library Promotion? Spell it B-O-O-K-S!". (PL) II-1: 49 Fa93
- Lenz, Mark. "Cartoon Theology." (TLE) XXXVII-2: 35 D96
- Lenz, Mark. "Anfection." (TLE). XLI-2: 35 D00
- Limmer, Bill. "Reaching Treasured Souls". XIII-2 22-23 Wi05. (LL).
- Loomis, Cheryl. "A Matter of Choice'." (TLE) XLII-4:99 My01
- McLean, Irma. "Teachers: "Share the Promise"." (TLE) XXXVII-4: 99 M97

Medendorp, John. "Shaping of a Soul, The." (*TLE*) X-4: 20. My70

Moskop, A.A. "Hobby Show, A." (*TLE*) II-3: 17. F62

Nitz, H.C. "A Christian Teacher's Contribution in the Present Emergency." (*LSB*) XIII-1: 1. S42

Ohlendorf, Rachel. "Confessions of a Time Thief." (*TLE*) XLII-4:118 My01

Paap, Irma. "The Teacher's Time: The Challenge The Blessing." (*TLE*) XXXI-4: 75. My91

Ponath, Ann. "I see London, I see France, I see..." (*LP*) X-6: 30-31 Ju/Au 03.

Raddatz, Darvin. "Wisconsin Evangelical Lutheran Synod: A Good Name for Schultzs." (*TLE*) XIII-1: 23-24. O72

Root, Cheryl. "The Storms of Life". XLVII-4: 121-122. M07. (*TLE*).

Schaller, Loren. "Relevance." (*TLE*) XI-2: 10-11. D70

Schaller, Loren. "Gurus, etc.." (*TLE*) XII-3: 18-19. F72

Schroeder, Morton. "Cathedrals Have Attics." (*TLE*) XXVI-1: 18-20. O85

Schroeder, Morton. "Portugal: Land of Contrasts." (*TLE*) XXVIII-4: 10-11. O87

Schuetze, John. "The Body Beautiful." (*LP*) V-3:10-11 Jan/Feb 1998

Seager, Heather. "The Painful Truth." (*LP*) X-2: 30-31 Nov/Dec02.

Sponholz, Martin. "South for the Winter." (*TLE*) XXIV-1: 17-19. O83

Sponholz, Martin. "Expeditions of Failure." (*TLE*) XXIV-2: 6-9. D83

Starr, Laurie. "Blessings Through Bruising." (*LP*) X-2: 28-29 Nov/Dec02.

Starr, Richard. "Mom, Dad, I'm Gay." (*LP*) X-5: 4-5 My/Ju 03.

Stetzenbach, Terry. "Ho! Ho! Ho!" (*LP*) III-2: 9-10. Nov/Dec 95

Stetzenbach, Terry. "The Gift of Stress? Yes." (*LP*) VI-1: 5 Sep/Oct98

Treptow, Earle. "God to Judah." (*TLE*) XLII-4:100-103 My01

Wandersee, James. "Can You Spare a Nanosecond?" (*TLE*) XXIX-4: 75. My89

Willems, Paul. "Why Do Believers Suffer?" (*TLE*) XLII-2:38-43 D01

Williams, Paul. "Good Wine." (*TLE*) XLII-1:4-5 O01

Woldt, Michael. "Question and Answer." (*LP*) III-1: 11. Sep/Oct 95

Woldt, Michael. "Question and Answer." (*LP*) III-2: 15. Nov/Dec 95

Woldt, Michael. "Question and Answer." (*LP*) III-3: 10. Jan/Feb 96

Woldt, Michael. "Question and Answer." (*LP*) III-4: 10. Mar/Apr 96

Woldt, Michael. "Question and Answer." (*LP*) III-5: 10. May/June

Woldt, Michael. "Question and Answer." (*LP*) III-6: 10. July/Aug 96

Van Stelle, Virginia. "The Story of Jesus: Its Impact on My Life and My Classroom." (*TLE*) XXXVIII-3:94-96 F98

Ziemer, Carl. "Love Is Correct Doctrine". XIII-2 28-29 Wi05. (*LL*).

## Missions

Ahlswede, Eugene. "To Canada." (*TLE*) XXVI-3: 21-22. F86

Anonymous. "Mission Fair—India Day." (*TLE*) XVI-1: 6. O75

Becker, Bruce. "All Mission Congregations." (*LL*) XII-1: 4-7 Fa03.

Borchardt, Paul. "Study Missions in Sunday School?" (*TLE*) IV-2: 15-17. D63

Braun, John. "Try New Things: An Interview with Brian Maurice." (*LL*) X-2: 14-17 Wi02

Gerlach, Joel. "About Whether the Weather is About to Change, or Will It ...." (*TLE*) XV-2: 2-3. D74

Hagedorn, Harold. "Following Up on Unchurched Sunday School Children." (*PL*) III-1: 28-29 Fa94

Hartman, Robert. "Mission Outreach." (*LL*). VIII-2:8-10 Wi00

Hartman, Robert. "Aufguar ia Outreach Month." (*LL*) X-2: 18-19 Wi02

Hintz, Michael. "Nothing I Can Do." (*LL*) XII-1: 22-23 Fa03.

Kieta, Geoffrey. "Breaking Through the Filters." (*TLE*) XXXV-1: 4 O94

Kluball, Gary. "You Are the World's Bible." (*LL*) XII-2: 20-21 Wi04.

Koeplin, Kurt. "The Mission Festival." (*TLE*) V-1: 18-20. O64

Plath, LeDell. "Vietnam—Some First Impressions." (*PL*) II-1: 27-28 Fa93

Rothe, Debbie, Ron Uhlhorn. "Sooo Far Away." (*LP*). VIII-3: 5 Jan/Feb01

Ruege, Ruth. "Religion and Education in Hong Kong." (*TLE*) V-2: 8-9. D64

Wendland, E.H. "They Sang Like Angels: Teaching Sunday School in the Africa." (*TLE*) XVII-2: 13-15. D76

Wiechmann, R. L. "Promoting Interest in Missions in our Area High Schools." (*TLE*) VII-1: 16-18. O66

Wolfgramm, Arno. "Part of God's Plan." (*LL*). IX-3:4-7 Sp01

Ziemer, Paul. "Serving the Military." (*LL*) XI-4: 28-29 Su03.

## Motivation

Albrecht, R.M. "What Can the Teacher Do ... Indifferent Attitude ... School." (*LSB*) XVIII-2: 3-5. D47

Arndt, Emanuel. "The Teacher Looks at Interest." (*LSB*) XVII-1: 3-4. O46

Berg, Linda. "How Do You Motivate and Encourage Learning in Children." (*PCE*) III-3: 40-41. Wi91

Bierwagen, Bertha. "Teaching with Enthusiasm." (*TLE*) IX-

2: 4-5. D68

Bliefernicht, E.R. "Motivation of School Work." (*LSB*) XIII-2: 2-4. D42

Fischer, Wayne. "What Will Make It Happen?" (*TLE*) XXXIII-3: 80-84. F93

Fischer, William. "Moralizing—The Confusion. of Law and Gospel When Teaching Children. (1)." (*TLE*) XVII-1: 2-6. O76

Fischer, William. "Moralizing—The Confusion. of Law and Gospel When Teaching Children. (2)." (*TLE*) XXVII-3: 18-22. F87

Grunze, Richard. "Increasing Gospel Appreciation." (*TLE*) XXVII-2: 7-10. D86

Hagedorn, Grace. "Ready or Not, Here I Come." (*TLE*) XIX-1: 13-14. O78

Heinz-Petersen, Debra. "Characteristics of a Motivating Teacher." (*TLE*) XXXIII-3: 85-88. F93

Heinz-Peterson, Debra. "Motivating Students for Learning." (*TLE*) XXXIII-4: 113-117. My93

Heinz-Peterson, Debra. "The Beginning, the Middle, the End." (*TLE*) XXXIV-1: 4-10 O93

Manthey, Frederick. "The Teacher Studies the Value of Voluntary and Involuntary Attention." (*LSB*) XVI-2: 3-4. D45

Mischke, Carl. "Spiritual Renewal: Where Does It Begin?" (*PCE*) I-1: 5. Su89

Paap, Irma. "Motivating with Christian Love and Kindness." (*TLE*) XXVI-2: 1-3. D85

Wessel, Howard. "Some Thoughts on Spelling Motivation." (*TLE*) XI-2: 8-9. D70

## Multicultural

Aderman, James. "Cultivating a Broader View." (*LP*) III-3: 6. Jan/Feb 96

Aswege, Dawn. "Connecting Race With Grace." (*LP*) IX-3: 13-14 Jan/Feb 02

Freeman, Leonard. "Talk the Talk; Walk the Walk," (*LL*) VI-1: 4-7 Fa97

Kastens, Gerald. "The Great Go-Mission in Manitowoc." (*LL*), V-1: 25-27 Fa97

Kieta, Geoffrey. "Breaking Through the Filters." (*TLE*) XXXV-1: 4 O94

Kimbrough, Ray. "African-American History: Who Needs It?" (*LP*) V-3: 5 Jan/Feb 1998

Pfeifer, Carrie. "Teaching God's Kaleidoscope." (*TLE*) XXXIV-4: 115-118 My94

Roth, Michael. "Latino Outreach." (*LL*) XI-3: 24-25 Sp03.

Schafer, Stephen. "African-American Celebration at Atonement." (*PL*) II-3: 23-24 Su94

Wendland, Paul. "Walls and Bridges." (*TLE*) XXXVII-1: 4-9 O96

Wulff, Frederick. "Build Bridges to Other Cultures". XLIV-3: 72-78 F04. (*TLE*)

## Multigraded

Dewalt, Mark. "One-room Schools: Current Trends in Parochial Education." (*TLE*), XXXVIII-1 12-20 O97

Dewalt, Mark. "A Day in the Life of a One-room School." (*TLE*) XXXIX-4: 119-123 M99

Gurgel, H.E. "Are We Underestimating the One-Room School?" (*LSB*) XVII-3: 4. F47

Krause, Carol. "Multi-Graded Classroom." (*TLE*) XVI-2: 6-7. D75

Mischke, Joel. "Physical Education in a Small School." (*TLE*) XXIV-4: 5-7. My84

Moldenhauer, Jeanne. "Kindergarten in the Multi-Grade Classroom." (*TLE*) XV-4: 6-7. My75

Nelson, Joel. "ORLS—A One-room School." (*TLE*) XXVII-2: 2-4. D86

Stindt, A.C. "The Daily Program." (*LSB*) II-1: 7. S31

Stindt, A.C. "The Daily Program." (*LSB*) II-2: 2. N31

Stindt, A.C. "A Suggested Program." (*LSB*) IV-1: 6. O33

Thiesfeldt, Steven. "Music in the Multigrade Classroom." (*TLE*) XIX-2: 18-20. D78

Wessel, Howard. "Individualizing Reading-A Possibility in Multi-grade Classroom." (*TLE*) XI-3: 11-12. F71

## Music

Adickes, David. "Double or Nothing." (*TLE*) XVI-4: 20-22. My76

Albrecht, Martin. "Are You a Choir Director?" (*TLE*) I-3: 16-18. F61

Albrecht, Martin. "What is Happening to Our School Music Course?" (*TLE*) II-1: 12-14. O61

Albrecht, Martin. "Choosing Proper Church Music." (*TLE*) II-2: 14-16. D61

Albrecht, Martin. "Choosing Proper Choir Music for the Church Service." (*TLE*) II-4: 16-18. My62

Albrecht, Martin. "Appropriate Music for the Marriage Service." (*TLE*) III-4: 18-19. My63

Albrecht, Martin. "Is There Too Much Modern Music in Our Churches?" (*TLE*) IV-1: 16-17. O63

Albrecht, Martin. "What Are We Doing to Improve Ourselves?" (*TLE*) V-1: 21-23. O64

Albrecht, Martin. "How Well are My School Children Singing?" (*TLE*) VIII-3: 20-22. F68

Albrecht, Martin. "Music Interests and Aptitude of the Child." (*TLE*) VIII-4: 18-20. My68

Albrecht, Martin. "What is Proper Church Music?" (*TLE*) X-4: 15-17. My70

Albrecht, Martin. "About Church Musicianship." (*TLE*) XII-1: 18-20. O71

Albrecht, Martin. "Is Your Music Improving?" (*TLE*) XII-2: 20-22. D71

Albrecht, Martin. "Are We Acting Wisely in Our Wedding Practices?" (*TLE*) XIII-2: 19-21. D72

Albrecht, Martin. "TACT." (*TLE*) XIII-3: 22-24. F73

Albrecht, Martin. "Praise God From Whom All Blessings

- Flow." (*TLE*) XIV-3: 10-12. F74
- Averbeck, Robert. "I Hear America Singing." (*TLE*) X-3: 6-7. F70
- Backer, Bruce. "Organ Music For the Distribution." (*TLE*) I-2: 17-20. D60
- Backer, Bruce. "Honey to Your Mouth." (*TLE*) V-3: 16-17. F65
- Backer, Emil. "Music Review." (*LSB*) VII-2: 6-7. D36
- Bartel, Fred. "Public Performance in Music." (*TLE*) XIX-4: 14-15. My79
- Bartel, Fred. "Music Ideas for Christmas Eve." (*TLE*) XX-1: 19-21. O79
- Bartel, Fred. "Part-singing." (*TLE*) XX-3: 20-22. F80
- Bartel, Fred. "Getting Ready for Part-Singing." (*TLE*) XXV-3: 7-8. F85
- Bauer, David and Edward Meyer. "Sing and Make Music: Recordings." (*TLE*). XLI-4: 106-107 My01
- Bauer, David. "Solfege is Superb!" (*TLE*) XLII-4: 104-109 My01
- Bauer, David. "Finding Time for Music". XLV-3: 84-87. F05. (*TLE*).
- Becker, Philip. "Church Musician." (*LL*) XII-2: 28-29 Wi04.
- Blauert, Fritz. "Instilling a Love for Singing." (*TLE*) XXXII-1: 27-29. O91
- Bolle, Carl. "Church Music With Special Emphasis on the Choir." (*LSB*) XV-2: 2-3. D44
- Christiansen, F. Melius. "The Combination of Words and Music." (*LSB*) VII-4: 5-6. My37
- Fehlauer, Adolph. "Children Can Be Taught to Sing." (*TLE*) XIV-4: 17-21. My74
- Fenner, Roger. "How Can You Afford Not to Have a Piano Course? ". XLVI-1: 6-8. O05. (*TLE*).
- Gerlach, Bryan. "Support Musicians." (*LL*). IX-1: 22-23 Fall00
- Grubbs, Paul, Erin Zastrow and Edward Meyer. "Sing and Make Music: Future Classroom Teachers." (*TLE*). XLI-4: 112-113 My01
- Hagedorn, Grace. "Looking Forward to Operetta Time." (*TLE*) VIII-3: 4-5. F68
- Hagedorn, Grace. "Learn to Sing in Six Easy Lessons." (*TLE*) XVIII-4: 13-14. My78
- Hagedorn, Mrs. Fred W. "Rhythm Bands can be Fun." (*TLE*) VI-2: 6-7. D65
- Hartman, John. "The Power of Music." (*LL*). VII-3: 24-25 Sp99
- Hennig, Grace. "Parish Artistic Creativity." (*LL*) XI-4: 26-27 Su03
- Hermanson, Roger. "Importance of Music Education, The." (*TLE*) XXI-3: 15-17. F81
- Kassulke, Paul. "Why Has Music Lost Its Forte?" (*TLE*) XXI-2: 15-17. D80
- Kresnicka, Judith. "Instruments in the Worship Service." (*TLE*) XVII-2: 16-18. D76
- Krug, Gary. "Christian Look at Rock, A (1)." (*TLE*) XXVI-1: 2-5. O85
- Krug, Gary. "Christian Look at Rock, A (2)." (*TLE*) XXVI-2: 11-13. D85
- Krug, Gary. "Christian Look at Rock, A (3)." (*TLE*) XXVI-3: 2-6. F86
- Krug, Gary. "Christian Look at Rock, A (4)." (*TLE*) XXVI-4: 1-4. My86
- Lange, Lyle. "Sing a Song of Salvation!" (*TLE*) XXIV-3: 4-6. F84
- Livingston, Karen, Bonnie Pufahl, Shirleen Maertz, and Edward Meyer. "Sing and Make Music: Classroom Teachers." (*TLE*). XLI-4: 117-120 My01
- Loomis, Cheryl, John Nolte and Edward Meyer. "Sing and Make Music: College Instructors." (*TLE*). XLI-4: 110-111 My01
- Manthey, Elsa. "Music and the Learning Disabled Child." (*TLE*) XXIX-3: 69-70. F89
- Markgraf, Dale, Ron Zahn, and Edward Meyer. "Sing and Make Music: Elementary School Principals." (*TLE*). XLI-4: 114-116 My01
- Martens, Gene. "Contemporary Music in the Classroom." (*TLE*) XXXV-4: 113-117 My95
- Menk, Darin. "Survey of Music Education in the WELS." (*TLE*) XLII-3: 75-81 F01
- Merseth, Karen. "Music in the Christian Day School Classroom." (*ELS*) I-1: 2 Fa97
- Meyer, Edward. "Aids for Teaching Music." (*TLE*) XIII-3: 10-11. F73
- Meyer, Edward. "Challenge of Teaching Music in Contemporary American Culture." (*TLE*) XIX-3: 17-19. F79
- Meyer, Edward. "Music-Making in the Service of the Gospel." (*TLE*) XV-1: 21-23. O74
- Meyer, Edward. "Teachers Speak on Music in the Upper Grades." (*TLE*) XV-2: 15-18. D74
- Meyer, Edward. "Behavioral Objectives for School Music." (*TLE*) XV-3: 13-15. F75
- Meyer, Edward. "Have You Joined the Kodaly Bandwagon?" (*TLE*) XVII-4: 17-19. M77
- Meyer, Edward. "Critical Periods in the Musical Development of Children." (*TLE*) XVIII-1: 17-19. O77
- Meyer, Edward. "Opinions: The Christian Day School Band Program." (*TLE*) XVIII-4: 15-18. My78
- Meyer, Edward. "Small Choirs." (*TLE*) XX-4: 18-20. My80
- Meyer, Edward. "Equipping Musicians for the Church." (*TLE*) XXI-4: 16-19. My81
- Meyer, Edward. "Research Into the Problem of Monotonism." (*TLE*) XXII-1: 21-23. O81
- Meyer, Edward. "United States Copyright Law: Implications for the Church Musician." (*TLE*) XXIII-2: 13-15. D82
- Meyer, Edward. "Using the Resources That are There: Creating a Concertato." (*TLE*) XXV-1: 13-18. O84
- Meyer, Edward. "Elementary School-Sponsored Piano Instruction." (*TLE*) XXV-2: 18-20. D84
- Meyer, Edward. "Quotations from Twenty-Five Years of

TLE Music Articles." (*TLE*) XXV-4: 12-15. My85  
 Meyer, Edward. "Music in Early Childhood." (*TLE*) XXVII-1: 14-17. O86  
 Meyer, Edward. "What Does Church Music Communicate?" (*TLE*) XXVIII-4: 14-17. O87  
 Meyer, Edward & Wayne Wagner. "The New WELS Elementary School Music Curriculum." (*TLE*) XXXIII-1: 26-32. O92  
 Meyer, Edward. "Sing and Make Music." (*TLE*). XLI-4: 101-105 My01  
 Meyer, Edward. "Sing and Make Music: Introduction." (*TLE*). XLI-4: 100 My01  
 Nolte, Carl and Edward Meyer. "Sing and Make Music: NPH." (*TLE*). XLI-4: 108-109 My01  
 Nolte, John. "Role of the Lutheran High School in Preparing Musicians for." (*TLE*) XVIII-3: 17-19. F78  
 Nolte, Waldemar. "What Music is Good to Use for Christian Worship?" (*TLE*) V-4: 17-18. My65  
 Oswald, H.C. "Studies in Lutheran Chorales: Non-Lutheran Chorales." (*TLE*) I-1: 16-17. O60  
 Pape, Ronald. "Licorice Stick, The." (*TLE*) XI-3: 13-14. F71  
 Petermann, Kurt. "Singing! Are We Losing It?" (*TLE*) XXII-2: 16-18. D81  
 Prange, Mary. "Service Playing: Wedding Music." (*TLE*) XVII-3: 21-23. F77  
 Ring, Alex. "Using Handbells in School and Church." (*ELS*). VI: 5,7 Fa99  
 Rygh, Laurie. "Let's Have Music. (ELS)" V: 2,4 Sp99  
 Sordahl, Peter. "Summer Music." (*LL*) X-2: 20-21 Wi02  
 Tank, James. "Luther's Music and Hymns." (*TLE*) VII-2: 8-11. D66  
 Thiesfeldt, Steven. "Music in the Multigrade Classroom." (*TLE*) XIX-2: 18-20. D78  
 Thoma, Rebekah. "Music, Movement, and Mazart." (*LP*). VII-6: 10-13 July/Aug 00  
 Volpe, Laurie, Mark Dewalt. "Music and Literature in the Classroom: A Powerful Combination." (*TLE*) XXXIX-1: 23-27 O98  
 Wagner, Wayne. "Handbells in Our Churches and Schools." (*TLE*) XX-2: 17-19. D79  
 Wagner, Wayne. "Preparing a Personal Philosophy of Music Education ... Christian. Tch.." (*TLE*) XXII-2: 19-21. D81  
 Wagner, Wayne. "Teaching Music With Ten Thumbs." (*TLE*) XXIII-1: 9-11. O82  
 Wagner, Wayne. "Music Education Survey Results." (*TLE*) XXIV-2: 14-17. D83  
 Wagner, Wayne. "New Organ Music Worth Investigating." (*TLE*) XXVIII-3: 10-12. F87  
 Wagner, Wayne. "Music in our Churches and Schools: The Perspective of Tradition." (*TLE*) XXXV-4: 118-125 My95  
 Wagner, Wayne. "Not Unto Us." (*TLE*) XLII-3:93-96 F01  
 Wagner, Wayne & Edward Meyer. "The New WELS Elementary School Music Curriculum." (*TLE*) XXXIII-1: 26-32. O92

Wendland, Paul O. "Gospel Freedom and Contemporary Music (1)." (*TLE*) XXXIII-2: 56-62. D92  
 Wendland, Paul O. "Gospel Freedom and Contemporary Music (3)." (*TLE*) XXXIII-3: 68-71. F93  
 Wendland, Paul O. "Gospel Freedom and Contemporary Music (3)." (*TLE*) XXXIII-4: 100-105. My93  
 Zahn, Meilahn. "Plea for a Program, A." (*TLE*) IX-2: 14-16. D68  
 Zahn, Meilahn. "Music—or Just a Song?" (*TLE*) IX-3: 17-19. F69  
 Zahn, Meilahn. "Is Rhythm the Forgotten Element in Your Classroom?" (*TLE*) X-1: 19-21. O69

## Obituaries

Anonymous. "Dorthea Gamm." (*TLE*) I-3: 24. F61  
 Anonymous. "Pastor John Plocher." (*TLE*) I-3: 24. F61  
 Anonymous. "William Hellermann." (*TLE*) I-4: 24. My61  
 Anonymous. "Henry Meyer." (*TLE*) II-4: 24. My62  
 Anonymous. "Charles Brenner." (*TLE*) II-4: 24. My62  
 Anonymous. "Winfried Stoekli." (*TLE*) III-1: 24. O62  
 Anonymous. "Karl Bauer." (*TLE*) III-3: 24. F63  
 Anonymous. "Paul Hippauf." (*TLE*) III-3: 24. F63  
 Anonymous. "Edgar Blauert." (*TLE*) IV-4: 20. My64  
 Anonymous. "Teacher Walter Huber." (*TLE*) IX-4: 21. My69  
 Anonymous. "Prof. Huldreich Klatt." (*TLE*) V-2: 22-23. D64  
 Anonymous. "Martin Dommer." (*TLE*) V-3: 22-23. F65  
 Anonymous. "Teacher William Winterstein." (*TLE*) VI-4: 15. My66  
 Anonymous. "Teacher Arthur Pape." (*TLE*) VII-1: 6. O66  
 Anonymous. "Prof. H.R. Palmbach." (*TLE*) VII-3: 5. F67  
 Anonymous. "John F. Meyer." (*TLE*) VIII-1: 22. O67  
 Anonymous. "Teacher Frank Redeker." (*TLE*) VIII-2: 20-21. D67  
 Anonymous. "Prof. R.M. Albrecht." (*TLE*) VIII-2: 21. D67  
 Anonymous. "Teacher Adolph Gerlach." (*TLE*) X-1: 18. O69  
 Anonymous. "Teacher James Enter." (*TLE*) X-3: 24. F70  
 Anonymous. "Teacher Adelbert Backer." (*TLE*) X-3: 5. F70  
 Anonymous. "Teacher Max Hackbarth." (*TLE*) X-3: 5. F70  
 Anonymous. "Teacher Albert Schleef." (*TLE*) X-4: 19. My70  
 Anonymous. "Teacher Henry Gruenhagen." (*TLE*) XI-1: 3. O70  
 Anonymous. "Teacher J.W. Wirth." (*TLE*) XI-2: 5. D70  
 Anonymous. "Teacher Paul Kolander." (*TLE*) XI-2: 5. D70  
 Anonymous. "Teacher Arthur Maas." (*TLE*) XI-4: 19. My71  
 Anonymous. "Teacher Richard Raabe." (*TLE*) XII-1: 17. O71  
 Anonymous. "Prof. Albert Stindt." (*TLE*) XII-4: 6. My72  
 Anonymous. "Teacher Theodore Lau." (*TLE*) XIII-3: 14. F73  
 Anonymous. "Mrs. Oscar Zander." (*TLE*) XIV-2: 23. D73

Anonymous. "Teacher Armin Huhn." (*TLE*) XIV-4: 24. My74

Anonymous. "Teacher John F. Gawrisch." (*TLE*) XIV-4: 7. My74

Anonymous. "Teacher Paul Koepsell." (*TLE*) XIX-1: 9. O78

Anonymous. "Arthur J. Ehlke." (*TLE*) XIX-3: 10. F79

Anonymous. "Mr. Emil Leitzke." (*TLE*) XIX-4: 4. My79

Anonymous. "Teacher William Kuether." (*TLE*) XV-1: 20. O74

Anonymous. "Teacher Waldemar Stindt." (*TLE*) XV-1: 4. O74

Anonymous. "Teacher Augusta Koch." (*TLE*) XV-2: 18. D74

Anonymous. "Miss Ruby Reich." (*TLE*) XV-4: 16. My75

Anonymous. "Teacher Herman Fehlauer." (*TLE*) XV-4: 19. My75

Anonymous. "Miss Ida Sperling." (*TLE*) XV-4: 23. My75

Anonymous. "Mrs. Carl F. Pape." (*TLE*) XVI-1: 13. O75

Anonymous. "Miss Dorothy Westphal." (*TLE*) XVI-1: 17. O75

Anonymous. "Teacher Russell Griffin." (*TLE*) XVI-1: 20. O75

Anonymous. "Teacher Theodore Boettcher." (*TLE*) XVI-4: 9. My76

Anonymous. "Teacher Leo Luedtke." (*TLE*) XVI-4: 9. My76

Anonymous. "Teacher Edward Bradtke." (*TLE*) XVII-1: 19. O76

Anonymous. "Teacher Arnold Wilbrecht." (*TLE*) XVII-1: 8. O76

Anonymous. "Teacher Frederick A. Grimm." (*TLE*) XVII-2: 22. D76

Anonymous. "Mr. Fredrick Janke." (*TLE*) XVII-3: 9. F77

Anonymous. "Teacher Ferdinand W. Schultz." (*TLE*) XVIII-1: 19. O77

Anonymous. "Teacher Paul A. Jungkuntz." (*TLE*) XVIII-1: 7. O77

Anonymous. "Teacher Orlan R. Dorn." (*TLE*) XVIII-2: 22. D77

Anonymous. "Teacher Victor J. Schulz." (*TLE*) XVIII-2: 22. D77

Anonymous. "Teacher Eldor Kopitzke." (*TLE*) XVIII-3: 11. F78

Anonymous. "Teacher Gerhardt A. Gilbert." (*TLE*) XVIII-3: 11. F78

Anonymous. "Teacher Robert E. Schierenbeck." (*TLE*) XVIII-4: 4. My78

Anonymous. "Teacher Waldemar A. Pape." (*TLE*) XVIII-4: 4. My78

Anonymous. "Mr. Gilbert Glaeser." (*TLE*) XX-1: 4. O79

Anonymous. "Reuben Kramer." (*TLE*) XX-2: 21. D79

Anonymous. "Carl F. Pape." (*TLE*) XX-3: 14. F80

Anonymous. "Teacher Fred C. Falk." (*LSB*) XXI-1: 7. O50

Anonymous. "Mr. Alvin Jantz." (*TLE*) XXI-2: 9. D80

Anonymous. "Mr. Helmuth Ihlenfeldt." (*TLE*) XXI-2: 9. D80

Anonymous. "Teacher Albert Mayer." (*LSB*) XXI-4: 12. My51

Anonymous. "Professor Adalbert Schaller." (*LSB*) XXII-3: 1. F52

Anonymous. "Armin Rauschke." (*LSB*) XXII-4: 10-11. My52

Anonymous. "Gerhard A. Koepsell." (*LSB*) XXIII-1: 8. O52

Anonymous. "Rhoda Kiekbusch." (*LSB*) XXIII-3: 8. F53

Anonymous. "Miss Ruth Priesz." (*LSB*) XXIII-3: 8. F53

Anonymous. "Mrs. Lorraine Vater." (*LSB*) XXIII-3: 8. F53

Anonymous. "Mr. Fred Eggers." (*LSB*) XXVII-1: 8. O56

Anonymous. "Otto H. Blase." (*LSB*) XXX-4: 7. My60

Anonymous. "Ernest F. Krause." (*LSB*) XXX-4: 8. My60

Baer, G.S. "Henry E. Kahnert." (*LSB*) XXIX-1: 7. O58

Brenner, John. "Teacher Alice Helen Kuhnke." (*LSB*) XXVI-4: 7-8. My56

Dahlke, J.C. "Martin Bussmann." (*LSB*) XXIX-2: 7. D58

Fehlauer, Adolph. "In Memoriam: Emil Trettin." (*TLE*) XI-1: 2-3. O70

Fehlauer, Adolph. "Karl A. Jungkuntz." (*LSB*) XXX-1: 8. O59

Habeck, Irwin. "William C. Prah." (*LSB*) XXVII-1: 7. O56

Hoenecke, Roland. "Professor Emil Backer." (*LSB*) XXVI-II-1: 7-8. O57

Schaller, Adalbert. "F.W. Meyer." (*LSB*) XIX-3: 1-2. F49

Schulz, W.E. "Herman E. Gurgel." (*LSB*) XXX-1: 7-8. O59

Trettin, Emil. "Paul G. Denninger." (*LSB*) XXIV-1: 16. O53

Trettin, Emil. "Gustav C. Groth." (*LSB*) XXIV-1: 16. O53

Trettin, Emil. "Louis Otto Keup." (*LSB*) XXIV-2: 7. D53

Trettin, Emil. "John A. Bushman." (*LSB*) XXIX-1: 7. O58

Trettin, Emil. "Theodore Schultz." (*LSB*) XXVII-3: 12. F57

Trettin, Emil. "Ernst F. Schulz." (*LSB*) XXVIII-3: 12. F58

## Objectives

Anonymous. "Filmstrips on Writing Behavioral Objectives." (*TLE*) X-2: 14-15. D69

Gerlach, Joel. "Educational Goals." (*TLE*) IX-3: 2-4. F69

Greenfield, Sandra. "Goals—Off Paper and Into Practice." (*TLE*) XXI-4: 14-15. My81

Heine, Beverly. "Views on Curriculum Study." (*TLE*) XIII-1: 6-7. O72

Meyer, Edward. "Behavioral Objectives for School Music." (*TLE*) XV-3: 13-15. F75

Plath, LeDell. "Curriculum Evaluation and Study Pilot Programs." (*TLE*) X-4: 10-11. My70

Rauschke, Armin. "The Objective of the Lutheran School." (*LSB*) XXII-4: 1-6. My52

Schultz, John. "Becoming Involved in Curriculum Study." (*TLE*) XI-4: 7-9. My71

Wessel, Howard. "Objectives-Functional Guide or Vague Generality." (*TLE*) IX-2: 8-9. D68

## Organ

- Albrecht, Martin. "Attention—Organists!." (*TLE*) I-1: 14-15. O60
- Albrecht, Martin. "Choosing Proper Organ Music For the Church Service." (*TLE*) II-3: 13-15. F62
- Albrecht, Martin. "Appropriate Music for the Marriage Service." (*TLE*) III-4: 18-19. My63
- Albrecht, Martin. "Spinnet Organ, The." (*TLE*) IV-1: 14-15. O63
- Albrecht, Martin. "Challenge to the Church Organist, A." (*TLE*) X-3: 19-21. F70
- Albrecht, Martin. "About Church Musicianship." (*TLE*) XII-1: 18-20. O71
- Albrecht, Martin. "Is Your Music Improving?" (*TLE*) XII-2: 20-22. D71
- Albrecht, Martin. "Uniformity in the Playing of Our Hymns." (*TLE*) XIII-1: 20-22. O72
- Albrecht, Martin. "Musical Instruments in the Church." (*TLE*) XIV-2: 20-22. D73
- Anderson, Ames. "Service Playing: The Hymn Intonation." (*TLE*) XVI-1: 14-17. O75
- Backer, Bruce. "Organ Music For the Distribution." (*TLE*) I-2: 17-20. D60
- Backer, Bruce. "Accompanying the Liturgy." (*TLE*) XVI-3: 20-22. F76
- Backer, Emil. "The Choir Leader and Organist." (*LSB*) II-3: 5-6. J32
- Backer, Emil. "The Organist and the Choir Leader." (*LSB*) II-4: 4-5. Mr32
- Backer, Emil. "Choir and Organ Music for the Christmas Season." (*LSB*) III-2: 5-6. N32
- Backer, Emil. "Choir and Organ Music for the Lenten and Easter Season." (*LSB*) III-3: 4. F33
- Backer, Emil. "Chorale and Hymn Playing." (*TLE*) XI-4: 17-19. My71
- Backer, Emil. "The Teacher as Organist." (*LSB*) XIII-4: 1-3. My43
- Backer, Emil. "Chorale and Hymn Playing." (*LSB*) XXIV-2: 3-4. D53
- Marowsky, Lawrence. "Service Playing: Funerals." (*TLE*) XVII-3: 19-20. F77
- Meyer, Edward. "Equipping Musicians for the Church." (*TLE*) XXI-4: 16-19. My81
- Nolting, Paul. "Our Parochial School Teachers." (*LSB*) XIII-4: 5. My43
- Prange, Mary. "Service Playing: Wedding Music." (*TLE*) XVII-3: 21-23. F77
- Schubkegel, Francis. "Service Playing—Hymn Accompaniments." (*TLE*) XVI-2: 13-15. D75
- Shilling, Ronald. "Service Playing: Accompanying the Choir and Soloist." (*TLE*) XVI-4: 17-19. My76
- Sievert, Erich. "Are the Hymn Numbers Ready?" (*LSB*) XXIII-4: 16. My53
- Sitz, Herbert. "Mild Dissent, A." (*TLE*) XII-4: 13-14. My72

Wagner, Wayne. "New Organ Music Worth Investigating." (*TLE*) XXVIII-3: 10-12. F87

## Parents

- Aderman, James. "The Ceremony." (*LP*) V-3:12-13 Jan/Feb 1998
- Aderman, James. "Spell it Baptism." (*LP*) V-5:5 May/June 1998
- Aderman, James. "Parents are Instructors." (*LL*). IX-1: 26-27 Fall00
- Ahlswede, Eugene. "Parent-Pastor Consultation." (*TLE*) XXVI-1: 7-8. O85
- Albrecht, Martin. "The Christian Teacher and the Parents." (*TLE*) IV-4: 7-9. My64
- Albrecht, Martin. "Home and the Confirmation Class, The." (*TLE*) VI-4: 13-15. My66
- Albrecht, Michael. "Twenty-six Muscles." (*LP*) X-3: 6-8 Ja/Fe 03.
- Averbeck, Julia. "Parent Involvement in the Kindergarten." (*TLE*) XI-4: 5-6. My71
- Averbeck, Robert. "Parent's Role in Education, The." (*TLE*) VI-1: 8-9. O65
- Averbeck, Robert. "Reporting Test Results to Parents." (*TLE*) XII-1: 6-7. O71
- Balge, Kristi. "Better Bedtime Behavior." (*LP*) IX-1: 14-15 Sep/Oct 01
- Bauer, Jackie. "Chart Your Course." (*LP*) III-1: 5. Sep/Oct 95
- Bauer, Jackie. "Building Healthy Parent/Teacher Relationships." (*LP*) III-5: 7. May/June 96
- Bauer, Jackie. "Parent-teacher Organizations: A Status Report." (*LP*) VI-1: 9 Sep/Oct98
- Baumler, Gary. "Read This ! It's for You!." (*PL*) IV-2: 11-12 Sp96
- Beres, Pamela Holtz. "Shake the Family Tree." (*LP*) V-2:12-13 Nov/Dec 1997
- Berger, Marie. "Positive Ways in Which the Teacher Can Influence the Growth." (*TLE*) XXV-2: 7-8. D84
- Biedenbender, Laurie. "What Mommy Needs Most." (*LP*) VI-5: 14-15 May/June99
- Biedenbender, Laurie. "Bad Parenting Moment #467." (*LP*) XI-1: 4-5 Sep/Oct 03.
- Boerneke, LeRoy. "Suffer the Little Children." (*TLE*) VI-4: 6-7. My66
- Braun, John. "Lord, Help Me As a Parent!." (*LP*) III-1: 15. Sep/Oct 95
- Braun, John. "God's Word Is the Christian Family's Advantage." (*LL*) V-4:13-17 Su97
- Braun, John. "Families Have Changed." (*LL*) VI-1:14-17 Fa97
- Brick, Delmar. "Home and the Christian Day School, The." (*TLE*) VI-4: 8-9. My66
- Burk, Milton. "Blessed Advantages of Christian Schooling." (*TLE*) XVI-4: 4-5. My76

- Carpenter, Craig. "Daddy Watch Me." (*LP*)V-4:14 Mar/April 1998
- Carpenter, Craig. "For a Good Night's Sleep." (*LP*) VI-5: 16 May/June99
- Carpenter, Craig. "Games People Play." (*LP*) VI-1:16 Sep/Oct98
- Carpenter, Craig. "Gone Fishin'" (*LP*)V-5:14 May/June 1998
- Carpenter, Craig. "The Kiss." (*LP*)V-3:16 Jan/Feb 1998
- Carpenter, Craig. "My Kids, My Rules." (*LP*). VIII-2: 16 Nov/Dec00
- Carpenter, Craig. "Pain." (*LP*). VIII-1: 16 Sep/Oct00
- Carpenter, Craig. "Backpacks." (*LP*) IX-4: 16 Ma/Ap 02
- Carpenter, Craig. "Old Enough." (*LP*) IX-5: 16 Ma/Ju 02
- Carpenter, Craig. "Wrestling." (*LP*) IX-3: 16 Jan/Feb 02
- Cordes, Chris. "There's Hope for the Family." (*PL*) II-2: 44-48 Sp94
- Czer, Ramona. "The Parent and the Child." (*PCE*) III-2: 20-21. Fa91
- Czer, Ramona. "If Only More Teachers Were Poets." (*TLE*) XXXV-1: 21-22 O94
- Czer, Ramona. "High Drama in the Upper Grades." (*TLE*) XXXV-3: 80-82 F95
- Czer, Ramona M. "Everyday Heroes." (*TLE*) XXXIII-1: 24-25. O92
- Czer, Ramona M. "What We Long to Hear." (*TLE*) XXXI-II-2: 41-42. D92
- Czer, Ramona. "How to 'Invent' a Child." (*TLE*). XL-3: 92-96 F00
- Davis, Lyndee. "Sounding Out the Words of Parenting." (*LP*) X-1: 32 Sep/Oct 02
- Davis, Lyndee. "Toenails." (*LP*) XI-2: 32 Nov/Dec 03.
- Davis, Lyndee. "Keep Out." (*LP*) X-3: 32 Ja/Fe 03.
- Davis, Lyndee. "Awake, Alive, and Loved." (*LP*) XI-3: 32 Jan/Feb04.
- Davis, Lyndee. "In God's Order, in God's Time." (*LP*) XI-4: 32 Mar/Apr04.
- Davis, Lyndee. "How Much is Too Much?" (*LP*) XI-5: 32 May/Jun04.
- Davis, Lyndee. "My Little Leader." (*LP*) X-4: 32 Ma/Ap 03.
- Duncan, Michael. "Home and School Cooperation: A Plan." (*PL*) II-3: 31-33 Su94
- Dusseau, Ray. "Great Expectations." (*LP*) IX-1: 10-11 Sep/Oct 01
- Evenson-Reed, Linda. "They Never Met My Mom!" (*LP*)V-5:12-13 May/June 1998
- Fehlauer, Adolph. "The Christian Family Challenged." (*PL*) II-1: 18-19 Fa93
- Fehlauer, Adolph. "Can We Evaluate?" (*TLE*) VI-4: 4-5. My66
- Fehlauer, Jeanne. "God, What Am I Doing Here?" (*LP*) XI-5: 6-8 May/Jun04.
- Fenske, R.A. "God-Given Responsibility to Parents, The." (*TLE*) VI-4: 2-3. My66
- Ferch, George. "Do You Have Any Children of Your Own?" (*LP*) VI-5: 12-13 May/June99
- Festerling, Melissa. "The Importance of Parent-teacher Communication." (*TLE*) XLIII-3: 88-94 F03.
- Fleischmann, Robert. "The Christian Family Reaches Out." (*LL*)VI-1:20-21 Fa97
- Fredrich, Janet. "Parents and Teachers: Learning to Communicate and Work Together". XLVII-2: 46-50. D06. (*TLE*).
- Freese, John. "Addressing Parental Concerns: Eight Habits of Highly Effective Persons." (*TLE*) XXXVII-1: 13-19 O96
- Freese, John. "Addressing Parental Concerns: Eight Habits of Highly Effective Persons." (*TLE*) XXXVII-2: 36-41 D96
- Freier, Mark. "The Vital Ingredient." (*PL*) III-1: 46-47 Fa94
- Gerlach, Joel. "Home and the Sunday School, The." (*TLE*) VI-4: 10-12. My66
- Gerlach, Joel. "Child in the Eyes of Parents and Teachers, The." (*TLE*) VIII-4: 2-3. My68
- Gerlach, Joel. "Education on Center." (*TLE*) X-4: 21-23. My70
- Greenfield, Sandra. "Extending the Classroom." (*TLE*) XX-3: 16-17. F80
- Gurgel, Barb. "A Time for Everything." (*PL*) I-1: 21-22. N92
- Hagedorn, Fred. "Christian Education." (*TLE*) III-2: 6-7. D62
- Hanneman, Daryl. "Preparing for the IEP Conference." (*TLE*) XXXIX-2: 59-61 D98
- Hartig, Vicki. "Note Cards From Heaven." (*LP*) III-1: 8-9. Sep/Oct 95
- Helwig, Donald. "Why Do We Have...?" (*TLE*) XIX-2: 8-10. D78
- Helwig, Donald. "Parent School Visitation." (*TLE*) XX-1: 17-18. O79
- Helwig, Don. "A Memory That Ticks." (*LP*)IV-6:10-11 July/Aug 1997
- Horn, Frederick. "Recommit to Serve Families." (*PL*) III-2: 47 Sp95
- Horn, Fritz. "Spiritual Photosynthesis." (*LL*) V-4:28-29 Su97
- Indahl, Andrea. "The Power of a Promise." (*LP*) X-3: 24 Ja/Fe 03.
- Juern, John. "Trust and the Parent/Child Relationship." (*LP*) III-3: 5. Jan/Feb 96
- Juern, John. "Tips for Teaching Problem Solving." (*LP*)V-2:2 Nov/Dec 1997
- Juern, John. "When Parents are Afraid to Parent." (*LP*)V-3:4 Jan/Feb 1998
- Juern, John. "Do Your Children Know You Love Them?" (*LP*)V-5:4 May/June 1998
- Juern, John. "Order in the Family." (*LP*)V-6 4 July/Aug98
- Juern, John. "Narcissism." (*LP*). VIII-2: 4 Nov/Dec00
- Juern, John. "Spiritually Strong. Emotionally Healthy." (*LP*). VII-4:5 Mar/Apr00
- Juern, John. "By Both Sound and Sight." (*LP*) XI-5: 23 May/Jun04.
- Juern, John. "Time for Bed." (*LP*) XI-2: 23 Nov/Dec 03.

- Kastens, Gerald. "Improving Parent Involvement in the Educational Programs of Your School." *(TLE)* XXVI-II-4: 78-81. My88
- Kastens, Jerry. "Rooted in Faith--Let Them Soar." *(LP)* XI-5: 28-30 May/Jun04.
- Koehler, Edward. "Cooperation of Home and School." *(TLE)* XIX-1: 5-6. O78
- Koeller, Ardis. "Assisting Parents in Helping ... Children With Special Needs." *(TLE)* XXVI-1: 12-14. O85
- Kolander, John. "Are We Now What We Were Then?" *(LP)*. VIII-1: 10-11 Sep/Oct00
- Kremer, Kenneth. "Exploring Parent and Teacher Expectations." *(TLE)* XXIX-1: 10-12. O88
- Kremer, Kenneth. "Exploding Myths Regarding Parental Discipline." *(TLE)* XXIX-4: 79-81. My89
- Kremer, Kenneth. "Shaping Jars of Clay." *(LL)* XII-2: 22-23 Wi04.
- Krug, Faith. "Parental Involvement in Early Childhood Education." *(TLE)* XXXVI-4: 103-107 M96
- LaGrow, George. "A Parent's Dilemma: Law or Gospel." *(LP)* VI:1 12-13 Sep/Oct98
- Lenz, Mark. "The Importance of Involving Parents." *(TLE)* XXXIII-2: 35. D92
- Leyrer, Philip. "Just One Step." *(LP)* VI-5: 10-11 May/June99
- Leyrer, Philip. "Dare We Hope?" *(LP)* XI-3: 30-31 Jan/Feb04.
- Loomis, Cheryl. "The Importance of Family Involvement in Becoming Literate". XLV-4: 115-122. M05. *(TLE)*.
- Miller, Raymond. "What Parents Expect of Instructors." *(TLE)* IX-2: 12-13. D68
- Miller, Brian. "Student-Led Part Conferences 1." *(TLE)* XLII-2:38-43 D01
- Miller, Brian. "Student-Led Part Conferences 2." *(TLE)* XLII-3:68-74 F01
- Mueller, Wayne. "A Definition of Lutheran Family Ministry." *(PL)* III-1: 5-8 Fa94
- Mueller, Wayne. "Family Ministry: Running in Place." *(PL)* IV-1: 16-17 Fa95
- Ninman, Nancy. "Ask the Experts." *(LP)*V-4:12-13 Mar/April 1998
- Needham, Dennis. "Improving Parent-Teacher Relationships." *(TLE)* XXIV-2: 19-21. D83
- Nelson, Jason. "Fatherhood Revisited." *(LP)* III-5: 8-9,14. May/June96
- Nelson, Joel. "To My Darling." *(LP)*. VIII-1: 6-7 Sep/Oct00
- Olson, Mary. "Parental Involvement: Informing, Involving, and Educating." *(PL)* II-1: 34-35 Fa93
- Olson, Mary. "Parental Involvement: Mission Impossible." *(PL)* III-2: 10-11 Sp95
- Parlow, John. "How to Involve Parents in Youth Ministry." *(PL)* III-1: 48-50 Fa94
- Payne, David. "The Single-Parent Scene—Helping Teens Cope." *(PL)* III-1: 44-45 Fa94
- Perham-Hester, Kathy. "Bedtime Stories About Gramma Sandy." *(LP)*IV-1:10-11 Sp98
- Petermann, Kurt. "Help for Parents." *(TLE)* XXV-3: 16-21. F85
- Petermann, Kurt. "Parental Dropout." *(TLE)* XXVI-4: 15-17. My86
- Petermann, Kurt. "What's Happening Out There?" *(TLE)* XXVIII-1: 15-16. O87
- Plath, LeDell. "Filling a Void." *(LL)*V-4:4-7 Su97
- Ponath, Ann. "My Little Janie." *(LP)* XI-3: 4-5 Jan/Feb04.
- Prange, Paul. "Christian Family Confirmation." *(PL)* II-1: 30-31 Fa93
- Price, Jane. "PTC." *(TLE)* XX-3: 18-19. F80
- Reed, Linda Evenson. "Torn by Divorce." *(LP)*IV-6:4-6 July/Aug 1997
- Ristow, Leroy. "Home, High School, and Country." *(TLE)* VI-4: 16-18. My66
- Roth, Jay. "Promoting the Christian Day School." *(TLE)* XII-4: 15-17. My72
- Schaller, Egbert. "A Blessed Fellowship." *(LSB)* XXIV-3: 1-2. F54
- Schmal, Mary. "As God Wills." *(LP)*V-6:12-13 July/Aug98
- Schmeling, Daniel. "Families: A Focus of the Lutheran Schools' Mission." *(PL)* I-1: 41-42. N92
- Schmeling, Daniel. "Families: A Focus of the Lutheran Schools' Mission." *(PL)* III-1: 18-19 Fa94
- Schmeling, Daniel. "Walking Together: K-12 Partnership." *(TLE)* XXVIII-3: 54-56. F88
- Schneck, James. "Moral Training: Not Just a Parent's Responsibility." *(ELS)* I-1: 1 Fall 97
- Schneck, James. "Moral Training: Not Just a Parent's Responsibility." *(ELS)* I-1: 1 Fa97
- Sims, Melinda. "New Plans for Wellspring." *(PL)* III-3: 33-34 Su95
- Smith, Robyn. "Simple Joys." *(LP)* XI-2: 24 Nov/Dec 03.
- Snyder, Kristin. "Normal?...not exactly!" *(LP)*V-6:6-8 July/Aug98
- Spurgin, Alan. "Parents as Advocates for the Exceptional Child." *(TLE)* XXXVII-2: 53-56 D96
- Staab, William. "'M and M's' of Communication, The." *(TLE)* XXIV-3: 18-20. F84
- Stenzenbach, Terry. "Minding the Minefield." *(LP)*V-1:14 Sep/Oct 1997
- Starr, Laurie. "Christian Motherhood: A Patchwork Quilt." *(LP)* III-5: 4. May/June 96
- Starr, Laurie. "Seeds of Favortism." *(LP)*. VII-6: 15 July/Aug 00
- Starr, Laurie. "What Kids Wish Their Parents Knew." *(LP)* IX-1: 4-5 Sep/Oct 01
- Stetzenbach, Terry. "The Perfect Party." *(LP)* IX-5: 4-5 Ma/Ju 02
- Stoekli, Winfred. "Parent-Teacher Conferences." *(TLE)* I-2: 7-8. D60
- Stuebs, Arden. "Train Up a Child in the Way He Is To Go." *(TLE)* XIV-3: 24. F74
- Sutton, Donald. "Every Family Needs Attention." *(PL)* III-

1: 4,8 Fa94

- Thaldorf, Jerald Mrs. "Mother's Thoughts As Her Child Enters Kindergarten, A." (*TLE*) XI-1: 9-10. O70
- Valleskey, David. "Lending to the Lord What is His." (*TLE*) XI-2: 2-3. D70
- Welch, Thomas. "In the Face of Defeat." (*LP*) III-6: 5. July/Aug 96
- Werre, Luke. "The Apple and the Apple Tree." (*LP*) X-4: 24 Ma/Ap 03.
- Wessel, Howard. "Home-School Cooperation in Remedial Reading." (*TLE*) XI-1: 16-17. O70
- Winkler, Kathleen. "The 'Lonely' Family." (*LP*) III-1: 12-13. Sep/Oct 95
- Woldt, Betsy. "A Parent's Picture of Preschool." (*TLE*) XXXII-3: 77-79. F92
- Woldt, Michael. "Question and Answer." (*LP*) IV-6: 14 July/Aug 1997

## Part-time Agencies

- Borchardt, Paul. "Saturday Schools." (*TLE*) V-4: 19-21. My65
- Dorn, W.F. "I Like Vacation Bible School." (*TLE*) II-1: 15-16. O61
- Eckert, Paul. "Using the Part-Time for Full-Time." (*TLE*) X-2: 16-18. D69
- Eckert, Paul. "Part-Time Agency for Adults, A." (*TLE*) XI-1: 18-20. O70
- Eckert, Paul. "Released Time—A Good Answer for Part-time Agencies?" (*TLE*) XIII-1: 14-16. O72
- Eckert, Paul. "Part-Time Could's and Should's." (*TLE*) XIV-1: 20-22. O73
- Fischer, William. "Effective Use of Our Part-Time Educational Agencies." (*TLE*) X-1: 14-16. O69
- Fischer, William. "Publications for the Part-Time Agencies in the Church." (*TLE*) XII-4: 18-21 My72
- Fischer, William. "Are You a Part-time Worker?" (*TLE*) XV-3: 16-18. F75
- Hochmuth, Robert. "SS + WBS = SS x 2." (*TLE*) X-3: 12-14. F70
- Janke, Philip. "Our Part-Time 'Mission Arms'—Are They as Strong ... Could." (*TLE*) VI-3: 14-15. F66
- Janke, Philip. "For Entertainment Only?" (*TLE*) VII-3: 12-14. F67
- Jeske, Mark. "Summer's Dilemma: To Teach or Not to Teach." (*TLE*) XXIV-4: 17-18. My84
- Koepsell, Markus. "Making Our Societies Effective Part-Time Agencies." (*TLE*) XI-3: 20-22. F71
- Kujath, Mentor. "Audio-Visuals for Part-Time Agencies." (*TLE*) XIII-2: 22-24. D72
- Otto, Karl. "Released-Time Classes." (*TLE*) II-4: 13-15. My62
- Ponath, David. "Lutheran Pioneers—A Part-Time Agency?" (*TLE*) XIV-3: 15-17. F74

## Pastor

- Ahlswede, Eugene. "The Relationship of Pastor and Teacher." (*TLE*) XXII-4: 2-4. My82
- Ahlswede, Eugene. "Parent-Pastor Consultation." (*TLE*) XXVI-1: 7-8. O85
- Balge, Richard. "The Sermon Is a Cooperative Effort." (*PL*) I-2: 12. Sp93
- Bitter, Donald. "Pastor as Promoter of the Christian Day School, The." (*TLE*) I-3: 2-3. F61
- Bitter, Donald. "Pastor as Promoter of the Christian Day School, The." (*TLE*) X-3: 10-11. F70
- Braun, John. "Grow and Stretch: An Interview with Brian Hennig." (*LL*) XI-4: 14-17 Su03.
- Braun, Mark. "Is Waterskiing a Means of Grace?" (*TLE*) XXI-4: 5-7. My81
- Braun, John. "Freeing Up the Pastor: An Interview with Randy Fink." (*LL*) IX-4: 14-17 Su01
- Franzmann, Martin. "Commencement Address." (*LSB*) XIII-1: 2-4. S42
- Gieschen, Henry. "The Pastor as Protagonist of the School." (*LSB*) VI-4: 1-3. Ap36
- Groth, Lynn. "Recruiting for the Preaching and Teaching Ministry." (*TLE*) XXX-1: 4-6. O89
- Hartmann, Robert. "Confirmation: Let's Make it Meaningful (1)." (*TLE*) XVII-3: 7-9. F77
- Hartmann, Robert. "Confirmation: Let's Make it Meaningful (2)." (*TLE*) XVII-4: 4-5. My77
- Hunter, Randy. "The Pastor is Key." (*LL*) XI-2: 28-29 Wi03.
- Janke, Paul. "The Pastor and the Child." (*PCE*) III-2: 23-24. Fa91
- Janke, Richard. "Professional Ethics of a Lutheran Teacher (1)." (*LSB*) XVI-2: 3-6. D45
- Janke, Richard. "Professional Ethics of a Lutheran Teacher (2)." (*LSB*) XVI-3: 3-5. F46
- Kirk, Daniel. "Me—a Pastor?" (*TLE*) XVIII-3: 23-24. F78
- Korthals, James. "Lawyers, Doctors, Plumbers, and Pastors." (*LL*) XI-4: 8-10 Su03.
- Lueneburg, Kurt. "The Pastor as Coach." (*LL*) XI-4: 4-7 Su03.
- Reim, E. "The Proper Relationship Between Pastor and Teacher." (*LSB*) VI-3: 1-2. F36
- Schaller, Loren. "Adolescent, His Pastor and Christian Teachers, The." (*TLE*) VIII-4: 15-17. My68
- Schierenbeck, Robert. "How Can and Should a Pastor Bring the Matter of CDS to People." (*LSB*) I-1: 2-3. N30
- Schierenbeck, Robert. "How Can and Should a Pastor Bring the Matter of the CDS." (*TLE*) XI-1: 5-6. O70
- Stelter, Edward. "Leading the Children into the Bible through the Morning Devo." (*TLE*) XVIII-3: 10-11. F78
- Wagenknecht, Myrl. "Aaron's Arms (2)." (*PL*) III-1: 37-39 Fa94
- Wichmann, W.F. "My Call and the Children of My Congregation." (*LSB*) XIV-3: 1-2. F44
- Zink, Robert. "Bible Class—The Best Way to Serve the

Young People of Our C." (*TLE*) XII-2: 17-19. D71

## Penmanship

- Hagedorn, Grace. "The Faster the Better." (*TLE*) XXIII-4: 9. My83  
 Hamisch, Marguerite. "Manuscript Writing" (*TLE*) V-2: 4-5. D64  
 Jantz, Arvin. "Is Good Penmanship Important Today?" (*TLE*) II-4: 6-7. My62  
 Kremmer, I. "Manuscript Writing" (*LSB*) VII-4: 2-4. My37  
 Sneaden, Victor. "Handwriting." (*LSB*) XXV-3: 5-7. F55

## Philosophy

- Anonymous. "Statement on the Philosophy and Purpose of the CDS." (*TLE*) X-2: 12-13. D69  
 Board for Parish Education. "A Statement on the Philosophy of Christian Education." (*LSB*) XXX-2: 3-4. D59  
 Boll, Arlyn. "Lights that Shine!" (*TLE*) XI-3: 7-8. F71  
 Fredrich, Edward. "Recognizing Conflict Between Christ. Education. and World Phil of Education." (*TLE*) XIV-2: 4-6. D73  
 Heier, Otto. "Rugged Individualists." (*TLE*) I-2: 2. D60  
 Hochmuth, Robert. "In the Margin." (*TLE*) XX-4: 2-4. My80  
 Janke, Philip. "Church's Curriculum Centers on Christ, The." (*TLE*) VI-1: 16-18. O65  
 Janke, Philip. "Church's Curriculum Centers on Christ, The." (*TLE*) XXV-4: 4-7. My85  
 Klatt, H.R. "Seeking the Major Premise Through the Ages." (*TLE*) III-3: 17-18. F63  
 Klatt, H.R. "An Approach to Foreign Affairs Since 1900 From a Christian Perspective." (*TLE*) V-3: 20-22. F65  
 Klatt, H.R. "An Appraisal of Educational Principles in the Light of Scripture." (*LSB*) XIV-4: 2-4. My44  
 Klatt, H.R. "Thoughts on Education." (*LSB*) XIV-4: 3. My44  
 Klatt, H.R. "What is New in Professional Books." (*LSB*) XIX-2: 2-3. D48  
 Klatt, H.R. "An Evaluation of the World's Philosophy of Education." (*LSB*) XVIII-4: 5-6. My48  
 Krueger, William. "Indoctrination: The Father of Individualism." (*TLE*) V-1: 2-3. O64  
 Meyer, F.W. "The Religious Philosophy of the Public School Education." (*LSB*) XII-2: 3. D41  
 Meyer, F.W. "No Change of Viewpoint or Aim." (*LSB*) XIV-1: 2-3. S43  
 Raabe, James. "Let's State our Christian Philosophy." (*TLE*) XIX-1: 21-22. O78  
 Russow, Howard. "How Luther Stressed the Importance of Christian Training." (*TLE*) VII-4: 2-3. My67  
 Schmidt, Wayne. "Reason, The." (*TLE*) II-2: 2-3. D61  
 Schultz, Dennis. "Going Public?" (*TLE*) XXVII-2: 13-15.

D86

- Thiesfeldt, Gregory. "Administrative Release Time (ART)." (*TLE*) XXXVIII-4: 121-126. My98  
 Wagner, Wayne. "Preparing a Personal Philosophy of Music Education ... Christian. Tch.." (*TLE*) XXII-2: 19-21. D81  
 Wilbrecht, Adolph. "Benefits Derived from a Christian Day School Education." (*TLE*) VIII-1: 2-3. O67

## Physical education

- Czer, Ramona. "B-Ball: Some Post-season Musings." (*TLE*) XXXVI-4: 116-118. M96  
 Dommer, M.L. "Calisthenics." (*LSB*) XIII-1: 4-5. S42  
 Duehlmeier, Margaret. "Planned Physical Education Experiences for Primary Children." (*TLE*) VII-3: 4-5. F67  
 Gronholz, John. "Exploration of a Curricular Frontier." (*TLE*) XV-3: 19-21. F75  
 Gronholz, John. "Physical Education and Its Contribution to General Education." (*TLE*) XLI-1: 14-19. O00  
 Heyer, Arnold. "Training the Whole Child." (*TLE*) V-4: 6-7. My65  
 Klindworth, Robert. "Physical Education and Sports in the Lutheran Elementary School." (*TLE*) XXXI-3: 68-72. F91  
 Lemke, Dick. "Run, Jump, and Hop for Elementary School Students." (*TLE*) XXXVI-4: 108-109. M96  
 Lequia, Joseph. "Winning or Participating (1)." (*TLE*) XXI-3: 8-10. F81  
 Mischke, Joel. "Physical Education in a Small School." (*TLE*) XXIV-4: 5-7. My84  
 Roth, Jay. "Time Out for Organized Sports." (*LP*) III-2: 12-13. Nov/Dec 95  
 Rendahl, Frieda. "Lessons From the Rink." (*LP*) V-4: 7-8. Mar/April 1998  
 Schommer, Jodie. "Development of Gross Motor Skills in Preschool Children." (*TLE*) XXXVI-3: 82-84. F96  
 Sitz, Carleton. "Conditioning Young Bodies for Sports and for Life." (*TLE*) XVII-3: 16-18. F77  
 Sitz, Carleton. "Training the Most Important Muscle in the Body." (*TLE*) XVII-4: 14-16. My77  
 Thompson, Lloyd. "Playground Objectives." (*TLE*) II-3: 6-7. F62  
 Weishahn, Milton. "Physical Education Program, A." (*TLE*) III-2: 2-3. D62

## Prayer

- Schlenvogt, Jane. "The Gift of Prayer." (*LP*) X-5: 24. My/Ju 03.  
 Tacke, Rachel. "A Boundless Resource." (*LP*) X-1: 28-29. Sep/Oct 02

## Preschool

Aonymous, "Why Use Praise." (*ELS*). VII:6 Sp/Su2000

Anonymous. "An Associate of Arts Degree in Early Childhood Education". XLV-4: 126. M05. (TLE).

Averbeck, Julia. "Have You Considered a Preschool?" (*TLE*) XIV-3: 13-14. F74

Biedenbender, Laurie. "Mommy Mania." (*LP*). VI-6: 12-14 Ju/Au99

Bilitz, Rose. "Classroom Conflicts=Teachable Moments." (*TLE*) XXXVI-3: 68-70 F96

Boerneke, LeRoy. "Suffer the Little Children." (*TLE*) VI-4: 6-7. My66

Butzow, Michael. "The Administration of Quality Preschool Programs." (*TLE*) XXXI-2: 28-36. D91

Czer, Ramona. "The Beginning and the End." (*TLE*) XXXVI-1: 21-23 O95

Festerling, Melissa. "Play: A Child's Best Teacher". XLIV-3: 88-92 F04. (TLE).

Fischer, William. "'Cradled in His Arms' Some Questions and Answers." (*TLE*) XXVI-1: 5-6. O85

Groth, Lynn. "Investing in Our Children." (*PCE*) I-2: 19. Fa89

Haar, Beverlee. "Preschool Curriculum." (*TLE*) XXXV-2: 58-60 D94

Haar, Beverlee. "Where Do I Begin?" (*TLE*) XXXV-3: 89-90 F95

Haar, Beverlee. "Early Childhood Education." (*TLE*) XXXVIII-1 21-26 O97

Hawkes, Elizabeth. "Teaching and Learning in the Preschool." (*TLE*) XXXI-3: 63-67. F91

Homan, Bonnie. "Teaching Bible Lessons to our Preschoolers." (*TLE*) XXXV-4: 104-105 My95

Isch, John. "Developmentally Appropriate Early Childhood Education: Rating." (*TLE*) XXXV-2: 61-62 D94

Isch, John. "A Code of Ethics for Teachers in Early Childhood Education Programs." (*TLE*) XLIII-2: 37-40 D02.

Krug, Faith. "Parental Involvement in Early Childhood Education." (*TLE*) XXXVI-4: 103-107 M96

Loomis, Cheryl. "School Readiness." (*TLE*) XLII-1:6-9 O01

Loomis, Cheryl. "Education through the Ages: Early Childhood Education". XLVI-1: 3. O05. (TLE).

McKenney, Bruce. "Your Child and Day Care." (*LP*) III-1: 6-7. Sep/Oct 95

Neuman, Jane. "Early Childhood Writing Experiences." (*TLE*) XXXV-3: 83-85 F95

O'Connor, Colleen. "Child Care—The Lansing Story." (*PL*) II-1: 23-24 Fa93

Ohm, Melodie. "Play in Learning". XLIV-3: 81-87 F04. (TLE).

Olson, Mary. "Parental Involvement: Sowing the Seeds." (*PL*) I-2: 50-51 Sp93

Olson, Mary. "Effective Early Childhood Environments." (*TLE*) XXXII-4: 119-122. My92

Schommer, Jodie. "Development of Gross Motor Skills in Preschool Children." (*TLE*) XXXVI-3: 82-84 F96

Schultz, Anthony. "You Can Tell the Little Children." (*PL*) I-1: 37-38. N92

Weiss, Monica. "When the Children Play, the Teacher Should ...." (*TLE*) XXXVII-1: 28-30 O96

Westphal, Sarah. "Once Around the Block." (*TLE*) XXXVII-2: 51-52 D96

Woldt, Betsy. "A Parent's Picture of Preschool." (*TLE*) XXXII-3: 77-79. F92

## Principals

Adickes, Robert + Meier. "Make Every Effort to Keep the Unity (Eph 4:3)." (*TLE*) XXIV-2: 12-13. D83

Arndt, Emanuel. "Book Review." (*LSB*) XXVIII-1: 5-6. O57

Biedenbender, Laurie. "The LES Principal: His Joys and Challenges." (*PL*) III-1: 20,23 Fa94

Boll, Arlyn. "Who Is He? What Does He Want?" (*TLE*) XIII-2: 14-15. D72

Boll, Arlyn. "Where's He Going? What's He Doing?" (*TLE*) XIII-3: 12-14. F73

Bowe, Keith. "Principals: Overseers Who Serve." (*LL*) X-4:24-25 Su02

Borgwardt, Wayne. "Let's Hear It For Adequate Administration." (*TLE*) XXV-3: 4-7. F85

Collyard, Larry. "Humanness in a Supervisory Capacity: You are a Person Also, ." (*TLE*) XXXVII-2: 46-50 D96

Gentz, Grant. "Man in the Office, The." (*TLE*) XIV-2: 9-10. D73

Gostchock, Sco tt. "Leadership for a New Era." (*TLE*). XL-3: 77-82 F00

Gruenhagen, Henry. "Getting Ready for the New School Year." (*LSB*) XXIX-4: 6-8. My59

Hering, Thomas. "The Principal." (*PL*) III-2: 27,30 Sp95

Ihlenfeldt, H.O. "The New Member on Your Staff." (*LSB*) XXIX-4: 8-9. My59

Kastens, Gerald. "Using Mentors With a New Teacher." (*TLE*) XXVIII-2: 37-38. D87

Keller, Kevin. "Leadership Effectiveness in the WELS Elementary Schools." (*TLE*) XXXVI-2: 52-56 D95

Koester, A.H. "Good Housekeeping in the School." (*LSB*) XXIV-3: 3-4. F54

Marozick, Laurie. "Early Childhood Corner." (*ELS*) V: 6 Sp99

Meier, William + Adickes. "Make Every Effort to Keep the Unity (Eph 4:3)." (*TLE*) XXIV-2: 12-13. D83

Moeller, James. "Principals—Why They Serve." (*PL*) IV-1: 41-42 Fa95

Pekrul, William. "A Retrospect on the Elementary School Principalship." (*TLE*) XXXVI-3: 85-88 F96

Plath, LeDell. "Teacher and Principal Assessment." (*PL*) III-1: 22-23 Fa94

Plath, LeDell. "We Need More Principals." (*PL*) IV-2: 28-29 Sp96

Plath, LeDell. "We Need More." (*TLE*) XXXVI-1: 24-27 O95

Rahn, James. "Define the Job." (*TLE*) XXXVI-4: 100-102 M96

## Psalms

Albrecht, Martin. "Psalter—Hymnbook and Prayer Book, The." (*TLE*) VI-1: 19-21. O65

Backer, Bruce. "O Come, Let Us Sing Unto the Lord." (*TLE*) I-4: 18-19. D61

## Public schools

Alfred, Carolee. "A New Endeavor". XLV-1:24-25. O04. (*TLE*).

Balge, Richard. "Dangers Inherent in Attending a State School." (*TLE*) XIV-3: 2-4. F74

Bauer, Jackie. "Public Education is not 'the enemy'." (*LP*). VI-6: 14 Ju/Au99

Bauer, Jackie. "Who's in Favor of Year-round School?" (*LP*) V-1:9 Sep/Oct 1997

Dewalt, Mark. "One-room Schools: Current Trends in Parochial Education." (*TLE*), XXXVIII-1 12-20 O97

Fredrich, Edward. "Recognizing Conflict Between Christ. Education. and World Phil of Education." (*TLE*) XIV-2: 4-6. D73

Gerlach, Joel. "Myth of a Value-Free System, The." (*TLE*) IX-1: 2-4. O68

Gerlach, Joel. "Educational Goals." (*TLE*) IX-3: 2-4. F69

Hartman, Carol. "Teaching Morality in Public Schools." (*TLE*) XXXV-4: 106-110 My95

Heier, Otto. "Religion in the Public School." (*TLE*) I-2: 2-3. D60

Isch, John. "Christians Teaching in a Public School." (*TLE*) XLII-1:10-25 O01

Klatt, H.R. "Educational Changes in our Present Changing World." (*LSB*) VIII-3: 2-5. F37

Kowalke, E.E. "Separation of Church and State." (*LSB*) XVII-2: 4-6. D46

Kretzmann, Carol. "Would You Teach in a Public School?" (*TLE*) II-4: 2-3. My62

Lau, H. "Jeremiah 9, 23-24." (*LSB*) XII-2: 5-6. D41

Lawrenz, Carl. "Dangers ...Introducing Religious Instruction in Pub Schools(1)." (*LSB*) XVI-3: 1-2. F46

Lawrenz, Carl. "Dangers ...Introducing Religious Instruction in Pub Schools(2)." (*LSB*) XVI-4: 1-2. My46

Magiera, Corrine. "This Little Gospel Light of Mine." (*LP*). VIII-4: 10-11 Mar/Apr01

McQuire, Sarah. "The Lafayette Charter School and Martin Luther College Partnership". XLVI-2: 49-51. D05. (*TLE*).

Meyer, F.W. "We Have the Answer." (*LSB*) IX-3: 6. F39

Meyer, F.W. "The Religious Philosophy of the Public School Education." (*LSB*) XII-2: 3. D41

Naumann, Oscar. "Religion in the Public Schools." (*TLE*) I-3: 14-15. F61

Nitz, H.C. "God in Our Public School." (*LSB*) XV-2: 3-4. D44

Otto, Karl. "Released-Time Classes." (*TLE*) II-4: 13-15. My62

## Questions

Barnes, Glenn. "Productive Thinking Through Questioning." (*TLE*) XIII-1: 17-19. O72

Barnes, Glenn. "Functions of Questions." (*TLE*) XIII-2: 11-13. D72

Berg, Linda. "Quality in Questioning." (*TLE*) XX-4: 7-9. My80

Glende, Arthur. "Questions with a Purpose." (*TLE*) X-4: 6-7. My70

Wessel, Howard. "Purposeful Reading in Social Studies." (*TLE*) XII-3: 8-10. F72

## Reading

Anonymous. "Book Chat." (*LSB*) II-3: 5. J32

Anonymous. "Teaching Reading, A Long Range View." (*TLE*) III-2: 4-5. D62

Arndt, Rhoda. "Creating Interest in Outside Reading." (*LSB*) XXVIII-4: 7-8. My58

Bauer, Jackie. "What in? What's Out?" (*LP*) VI-3: 14 Jan/Feb 99

Bitter, Alan. "How Should We Teaching Reading?" (*TLE*) XXXIV-2: 36-43. D93

Bitter, Alan. "Alan Bitter Replies." (*TLE*) XXXIV-4: 113-114 My94

Czer, Ramona. "I Read a Book Once: A Student's Perspective." (*TLE*) XXXIX-2: 48-50 D98

Czer, Ramona. "The Story of a Reader." (*TLE*) XXXIX-4: 115-118 M99

Duveneck, Pamela, Amy McCargar, Elise Shambeau. "Saxon Phonics: Three Teachers Comment". XLV-3: 88-93. F05. (*TLE*).

Ehlke, Lorna. "Bozo, the Busy Puppet." (*TLE*) XII-1: 4-5. O71

Everts, Laverna. "Phonics." (*LSB*) XX-2: 6-7. D49

Franzmann, Werner. "Vereh Clevah, Meh Deah! Pompositives of Speech and Related P?" (*TLE*) III-3: 19-21. F63

Frick, Carol. "Alpha People Bring Fun to Phonics." (*TLE*) XIII-4: 10-11. My73

Grabitske, Patricia. "Book Buddies: An Adventure in Cross-age Reading". XLIV-1: 13-17. O03. (*TLE*).

Giegling, Lillain. "Problems in My First/Second Grade Reading Course." (*LSB*) XIX-1: 3-4. O48

Haehlke, Lora. "A Device for Stimulating Interest in Reading Library Books." (*LSB*) XXII-3: 5-6. F52

Heiden, Delores. "Volunteer Tutors in Reading: Recruitment and Training of Volunteers." (*TLE*). XL-4: 100-107 My00

- Heiden, Delores and Vicki Riness. "Volunteer Tutors in Reading: Taking the First Steps." (*TLE*). XL-3: 68-76 F00
- Huhn, Armin. "Diagnostic and Remedial Reading (1)." (*LSB*) XXV-1: 2-4. O54
- Huhn, Armin. "Diagnostic and Remedial Reading (2)." (*LSB*) XXV-2: 3-6. D54
- Huhn, Armin. "Diagnostic and Remedial Reading (3)." (*LSB*) XXV-3: 3-5. F55
- Huhn, Armin. "Diagnostic and Remedial Reading (3)." (*LSB*) XXV-4: 3-7. My55
- Kaesmeyer, Harris. "Outside Reading in the Lutheran High School." (*TLE*) VII-3: 10-11. F67
- Kaiser, Paul. "As Long as They are Reading." (*TLE*). XLI-2: 36-37 D00
- Kirschke, William. "Book Review: Reading Readiness, Harrison." (*LSB*) XVIII-1: 6-7. O47
- Kissinger, Mrs. Donald. "St. John's First Graders Learned to Read Via i/t/a." (*TLE*) VII-1: 13-15. O66
- Kissinger, Wally. "Whole Language: A Personal Venture." (*TLE*) XXXI-4: 92-96. My91
- Klug, Ronald. "Round and Round in Reading." (*TLE*) VI-3: 8-9. F66
- Lanphear, Gerald. "Teacher's Role In Diagnosing Reading Problems." (*TLE*) XII-4: 7-9. My72
- Lanphear, Joan. "Suggestions For Early Reading Instruction." (*TLE*) X-3: 4-5. F70
- Loomis, Cheryl. "The Read-Aloud Parent." (*LP*) VI-3: 10-11 Jan/Feb 99
- Madson, Margaret. "Reading in Kindergarten." (*TLE*) XV-3: 4-5. F75
- Markgraf, Dale. "Building Word Power." (*TLE*) IX-2: 6-7. D68
- Martin, G. "Remedial Reading." (*LSB*) XII-4: 3-4. My42
- Mielke, Sara. "Why Youth are Discouraged From Reading." (*TLE*). XLI-3: 93-94 F01
- Mueller, Jean. "My Phonics Cheerleader." (*TLE*) XI-3: 5-6. F71
- Paap, Irma. "Effective Utilization of the Social Studies Text." (*TLE*) XII-1: 8-9. O71
- Peikert, Ruth. "Step One—Readiness." (*TLE*) XVIII-1: 8-9. O77
- Plath, LeDell. "Reflections on the National Literacy Convention." (*PL*) I-1: 43-44. N92
- Quandt, Lillian. "Reading Readiness." (*TLE*) I-3: 4-5. F61
- Schlueter, Viola. "How I Did It (2)." (*LSB*) XXI-3: 2-4. F51
- Schnick, Thomas. "Phonological Training for Reading Teachers." (*TLE*) XXIX-1: 7-9. O88
- Schroeder, David. "You Are an Awakener: Literature in the Classroom." (*TLE*) XXXI-1: 19-24. O90
- Schultz, Dennis. "Has It? Will It? What About It?" (*TLE*) XXVI-1: 15-18. O85
- Schulz, Arthur. "Tasted - Swallowed - Chewed - Digested." (*TLE*) V-4: 22-23. My65
- Schulz, Arthur. "What is New in Professional Books." (*LSB*) XXIII-2: 3. D52
- Schumann, Dolores. "Teaching a Reading Song." (*LSB*) XXVII-1: 7. O56
- Schweppe, Carl. "Few Comments on Literature in Our Schools, A." (*TLE*) XI-2: 16-18. D70
- Sievert, Erich. "How to Conduct a Fifth Grade Reading Lesson." (*LSB*) IX-2: 3-5. D38
- Sievert, Erich. "TTA — ARA — TO." (*TLE*) V-4: 8-9. My65
- Sievert, Erich. "What is New in Professional Books." (*LSB*) XX-1: 2. O49
- Sievert, Hertha. "Problems in My Third/Fourth Grade Reading Course ...." (*LSB*) XIX-2: 3. D48
- Sitz, Carleton. "Initial Teaching Alphabet." (*TLE*) VI-1: 10-12. O65
- Sitz, Carleton. "i/t/a Project in St. John's School, The." (*TLE*) VII-1: 11-12. O66
- Sitz, Herbert. "Book Chat." (*LSB*) I-1: 4-5. N30
- Sitz, Herbert. "The Use of the School Library." (*LSB*) I-3: 1. n.d.31
- Sitz, Herbert. "The School Library." (*LSB*) II-1: 3-5. S31
- Sitz, Herbert. "The School Library." (*LSB*) II-2: 3. N31
- Spaude, Naomi. "Speak, Read, Write." (*TLE*) XVII-1: 7-8. O76
- Steinbach, Paul. "Reading Methods in the WELS." (*TLE*) XXXIV-4: 108-112 My94
- Stindt, A.C. "The Pupil's Vocabulary." (*LSB*) I-2: 2-3. n.d.30
- Swantz, Ralph. "Problems in My Fifth/Six Grade Reading Course ...." (*LSB*) XIX-3: 5-6. F49
- Weber, Joanne. "Book Fair." (*PL*) III-3: 35-36 Su95
- Wendler, David. "The Expectation Map." (*TLE*) XXIX-3: 71. F89
- Wessel, Howard. "Home-School Cooperation in Remedial Reading." (*TLE*) XI-1: 16-17. O70
- Wessel, Howard. "Individualizing Reading-A Possibility in Multi-grade Classroom." (*TLE*) XI-3: 11-12. F71
- Wessel, Howard. "Preparation for Reading in Social Studies." (*TLE*) XII-2: 6-7. D71
- Wessel, Howard. "Purposeful Reading in Social Studies." (*TLE*) XII-3: 8-10. F72
- Wessel, Howard. "Oral Reading by the Teacher." (*TLE*) XIII-4: 14-15. My73
- Wessel, Howard. "Estimating Readability by the Cloze Procedure." (*TLE*) XV-2: 13-14. D74
- Wessel, Howard. "More on Readability." (*TLE*) XVI-1: 9-10. O75
- Wessel, Howard. "Three Aids for Remedial Reading." (*TLE*) XVI-4: 12-13. My76
- Wessel, Howard. "Selecting Materials for the Reading Program." (*TLE*) XXIII-2: 5-7. D82
- Whaley, Cindy. "A Balanced Approach to Reading Instruction". XLIV-1: 18-28. O03. (*TLE*).
- Whited, Sandra. "Lindamood-Bell Reading Therapies". XLV-4: 105-108. M05. (*TLE*).
- Witt, Steven. "Fifth and Sixth Graders' Reaction to Literature Circles". XLVI-1: 23-30. O05. (*TLE*).

## Recruitment

- Bitter, Donald. "Pastor as Promoter of the Christian Day School, The." (*TLE*) X-3: 10-11. F70
- Brokmeier, Kenneth. "Who Will Go?" (*LP*). VII-6: 4-5 July/Aug 00
- Brutlag, Ronald. "Who Will Go?" (*TLE*). XLI-4: 121 My01
- Fehlauer, Adolph. "Your Christian Schools." (*TLE*) XII-2: 8-9. D71
- Fehlauer, Adolph. "Excuses." (*LSB*) XXVII-4: 5-6. My57
- Gieschen, Henry. "The Pastor as Protagonist of the School." (*LSB*) VI-4: 1-3. Ap36
- Isch, John. "Gains and Losses in WELS Lutheran Elementary Schools." (*TLE*) XXXVII-4: 114-121 M97
- Kirschke, William. "Who Should Solicit Children for our Christian Day School." (*LSB*) IX-3: 1-2. F39
- Meyer, F.W. "Scripture Versus Philosophy." (*LSB*) XI-4: 3. My41
- Roth, Jay. "Promoting the Christian Day School." (*TLE*) XII-4: 15-17. My72
- Schaller, W. "Cultivation of Interest in CDS at Our Academies." (*LSB*) XI-4: 1-2. My41
- Schierenbeck, Robert. "How Can and Should a Pastor Bring the Matter of CDS to People." (*LSB*) I-1: 2-3. N30
- Schierenbeck, Robert. "How Can and Should a Pastor Bring the Matter of the CDS." (*TLE*) XI-1: 5-6. O70
- Sitz, Herbert. "A School Exhibit." (*LSB*) I-2: 1. n.d.30
- Trettin, Emil. "Will You Help." (*LSB*) XXVIII-2: 6-7. D57

## Reformation

- Huebner, Lloyd. "Bible—What a Wonderful Book, The." (*TLE*) VII-4: 4-8. My67
- Jacobson, Gerald. "Reformation Educational Thought." (*TLE*) XIX-1: 18-20. O78
- Koelpin, Arnold. "Reformation Studies in the Upper Grades." (*TLE*) VII-4: 17-19. My67
- Petermann, Kurt. "Reformation Projects." (*TLE*) XXIII-2: 2-4. D82

## Relationships

- Adickes, Robert + Meier. "Make Every Effort to Keep the Unity (Eph 4:3)." (*TLE*) XXIV-2: 12-13. D83
- Ahlswede, Eugene. "The Relationship of Pastor and Teacher." (*TLE*) XXII-4: 2-4. My82
- Ahlswede, Eugene. "How Well Do You Take Criticism?" (*TLE*) XXIV-3: 16. F84
- Albrecht, Martin. "The Christian Teacher and the Parents." (*TLE*) IV-4: 7-9. My64
- Angle, Kay. "Relationships: The Teacher and the Child." (*PL*) II-2: 8-9 Sp94
- Anonymous. "The Christian Teacher and His Co-Workers." (*TLE*) IV-4: 12-14. My64
- Anonymous. "Home and School Training." (*LSB*) XV-1: 1-2.

O44

- Arras, Florence. "Courtesy and Conduct of a Christian Teacher." (*TLE*) I-4: 4-7. My61
- Averbeck, Robert. "Sociogram, The." (*TLE*) VII-1: 9-10. O66
- Becker, Bruce. "Fixing the Problem of Six." (*PL*) III-3: 12-13 Su95
- Berger, Marie. "Positive Ways in Which the Teacher Can Influence the Growth." (*TLE*) XXV-2: 7-8. D84
- Bliefernicht, E.R. "The Teacher Studies the Temperament of the Child." (*LSB*) XVI-1: 2-3. O45
- Boll, Arlyn. "Who Is He? What Does He Want?" (*TLE*) XIII-2: 14-15. D72
- Boll, Arlyn. "Where's He Going? What's He Doing?" (*TLE*) XIII-3: 12-14. F73
- Brick, Delmar. "Home and the Christian Day School, The." (*TLE*) VI-4: 8-9. My66
- Czer, Ramona. "Relationships in the Sunday School (2)." (*PL*) III-3: 46-47 Su95
- Fellers, Debra. "Relationships in the Sunday School (1)." (*PL*) III-2: 14-15 Sp95
- Gerlach, Joel. "Home and the Sunday School, The." (*TLE*) VI-4: 10-12. My66
- Gerlach, Joel. "Child in the Eyes of Parents and Teachers, The." (*TLE*) VIII-4: 2-3. My68
- Heine, C.F. "The Dignity of the Child." (*LSB*) XII-1: 1-3. S41
- Hellermann, William. "Good Manners." (*LSB*) XIV-1: 3-5. S43
- Helwig, Donald. "Why Do We Have...?" (*TLE*) XIX-2: 8-10. D78
- Helwig, Donald. "Home Visitation." (*TLE*) XIX-4: 8-9. My79
- Helwig, Donald. "Parent School Visitation." (*TLE*) XX-1: 17-18. O79
- Huebner, Lloyd. "Making an Image." (*TLE*) XII-3: 2-3. F72
- Ihlenfeldt, Alma. "The Value of Home Contacts for the Primary Teacher's Work." (*LSB*) XXI-1: 2-5. O50
- Janke, Paul. "Relationships in the Sunday School (3): The Pastor and the C." (*PL*) IV-1: 45-46 Fa95
- Janke, Richard. "Professional Ethics of a Lutheran Teacher (1)." (*LSB*) XVI-2: 3-6. D45
- Janke, Richard. "Professional Ethics of a Lutheran Teacher (2)." (*LSB*) XVI-3: 3-5. F46
- Kastens, Gerald. "Improving Parent Involvement in the Educational Programs of Your School." (*TLE*) XXVI-II-4: 78-81. My88
- Keup, Louis. "Report-to-Parents Day." (*LSB*) XXII-3: 6. F52
- Koehler, Edward. "Cooperation of Home and School." (*TLE*) XIX-1: 5-6. O78
- Meier, William + Adickes. "Make Every Effort to Keep the Unity (Eph 4:3)." (*TLE*) XXIV-2: 12-13. D83
- Needham, Dennis. "Improving Parent-Teacher Relationships." (*TLE*) XXIV-2: 19-21. D83

- Ott, Linda and Dave Ponath. "The Befriending Ministry at Christ Lutheran." (*PL*) I-1: 15-16. N92
- Petermann, Kurt. "Help for Parents." (*TLE*) XXV-3: 16-21. F85
- Petermann, Kurt. "What's Happening Out There?" (*TLE*) XXVIII-1: 15-16. O87
- Ponath, Dave and Linda Ott. "The Befriending Ministry at Christ Lutheran (1)." (*PL*) I-1: 15-16. N92
- Ponath, David and Linda Ott. "The Befriending Ministry at Christ Lutheran (2)." (*PL*) I-2: 32-33 Sp93
- Price, Jane. "PTC." (*TLE*) XX-3: 18-19. F80
- Reim, E. "The Proper Relationship Between Pastor and Teacher." (*LSB*) VI-3: 1-2. F36
- Schmidt, Michelle. "How To Handle a Bully". (*LP*). VIII-6: 6-8 July/Aug01
- Schulz, Arthur. "Intermediate Grade Child and His Teacher, The." (*TLE*) VIII-4: 8-11. My68
- Sievert, Erich. "Upper Grade Child and his Teacher, The." (*TLE*) VIII-4: 12-14. My68
- Sievert, Roger. "Communications Among Our Schools." (*TLE*) XXIII-2: 16-18. D82
- Staab, William. "'M and M's' of Communication, The." (*TLE*) XXIV-3: 18-20. F84
- Stellhorn, A. C. "Home Rehabilitation and the School." (*TLE*) II-3: 20. F62
- Woltmann, William. "Teacher-Pupil Relations in the Intermediate Grades." (*TLE*) I-1: 6-7. O60
- Zimmermann, Doris. "Primary Grade Child and His Teacher, The." (*TLE*) VIII-4: 6-7. My68

## Religion

- Anonymous. "The Curriculum in Religion." (*TLE*) II-1: 21. O61
- Anonymous. "A Symposium." (*LSB*) VI-2: 3-4. D35
- Anonymous. "Remember Your Umbrella: A review of Religious Materials for Children." (*LP*). VIII-3:10-11 Jan/Feb01
- Arndt, Ruth. "Teacher, What are 'Flops'?" (*TLE*) XVI-1: 4-6. O75
- Burmeister, Paul. "Pictures that Pay Premiums." (*TLE*). XL-1: 14-17 O99
- Bierwagen, H.F. "Spener and Francke." (*LSB*) XVI-2: 6. D45
- Endorf, Anna. "ChristLight: A First Look." (*TLE*) XXXIX-4: 124-128 M99
- Fehlauer, Adolph. "Meaningful Memory Work." (*TLE*) I-3: 9-10. F61
- Gerlach, Joel. "Let us Pray!." (*TLE*) XIII-2: 2-4. D72
- Gerlach, Joel. "Smile, God Loves You." (*TLE*) XVI-4: 2-3. My76
- Glaeser, Angelica. "Correlation in Religion." (*LSB*) XII-1: 3-4. S41
- Grunze, Richard. "Increasing Gospel Appreciation." (*TLE*) XXVII-2: 7-10. D86
- Gurgel, Richard. "The Chance of a Lifetime..every day." (*LP*)IV-6:8 July/Aug 1997
- Hagedorn, Grace. "Tattletale." (*TLE*) XIX-4: 10-11. My79
- Hahn, James. "How Franzmann's Commentary Enriched My Ministry." (*PCE*) III-3: 38-39. Wi91
- Hartzell, Eric. "The Same Old Lies." (*LP*)V-5:6-8 May/June 1998
- Hasley, Karen. "Drama and the Psalms." (*TLE*) XX-2: 15-16. D79
- Helwig, Don. "From Generation to Generation." (*LL*)VI-2:18-19 Wi98
- Henkel, Linda. "Teaching the Word with Puppets." (*PL*) III-1: 26-27 Fa94
- Homan, Bonnie. "Teaching Bible Lessons to our Preschoolers." (*TLE*) XXXV-4: 104-105 My95
- Isch, John. "Gladly, the Cross-eyed Bear." (*TLE*) XXVIII-1: 17-18. O87
- Isch, John. "Content and Method in Teaching Primary Grade Religion." (*TLE*) XXVIII-2: 39-42. D87
- Isch, John. "The Application in a Religion Lesson." (*TLE*) XXVIII-3: 51-53. F88
- Isch, John. "How We Teach Religion, Part 1." (*TLE*) XXXII-1: 4-9. O91
- Isch, John. "How We Teach Religion, Part 2." (*TLE*) XXXII-2: 36-43. D91
- Isch, John R. "Prosody and Religion Lessons." (*TLE*) XXXIII-2: 63-64. D92
- Jacobson, Gerald. "Children's Religious Books: Join the Rat Race." (*TLE*) XV-4: 20-21. My75
- Janke, Philip. "Qualifications for Religion Instructors in Secondary Schools." (*TLE*) XVI-1: 11-13. O75
- Kastens, Gerald. "Scriptural Perspectives in the New Religion Curriculum." (*PL*) II-2: 4-5,9 Sp94
- Kastens, Gerald. "The Coordinated Religion Curriculum—Checking the Course." (*TLE*) XXXIII-4: 121-122. My93
- Kastens, Gerald. "Christ-Light: A Beacon for Children and Families." (*LL*)VI-2:4-7 Wi98
- Koch, H.A. "Gleanings From the Field of Prayer." (*LSB*) XVIII-2: 1-3. D47
- Koelpin, Arnold. "Luther's Catechisms: Brickbats and Plaudits." (*TLE*) XIX-4: 21-23. My79
- Krueger, William. "Indoctrination: The Father of Individualism." (*TLE*) V-1: 2-3. O64
- Kuske, David. "The Religion Curriculum Project: What are its Goals?" (*PCE*) III-3: 42-43. Wi91
- Lenz, Mark. "Are You Prejudicing Children?" (*TLE*) XXXIV-2: 35 D93
- Meyer, F.W. "Do You Believe What You Say?" (*LSB*) XI-1: 3-4. S40
- Meyer, Henry. "Gleanings From the Field of Prayer." (*LSB*) XVIII-3: 1. F48
- Meyer, Marie. "Listen to the Lesson." (*TLE*) XII-2: 4-5. D71
- Mulinix, Michael. "Being Good and Doing Good." (*TLE*)

XXIX-2: 33-38. D88

Paap, Irma. "Practical Teaching Aids for Teaching the Story of God's Love." (*TLE*) XVII-1: 20-22. O76

Proeber, Kathleen. "Christ's Love Lives in Little Ones (1)." (*TLE*) XXII-1: 8-10. O81

Proeber, Kathleen. "Christ's Love Lives in Little Ones (2)." (*TLE*) XXII-2: 14-16. D81

Proeber, Kathleen. "Christ's Love Lives in Little Ones (3)." (*TLE*) XXII-3: 5-6. F82

Schaller, Adalbert. "Gleanings From the Field of Prayer." (*LSB*) XVIII-4: 1-3. My48

Schaller, Egbert. "Gleanings From the Field of Prayer." (*LSB*) XVIII-1: 1-2. O47

Scharf, Erwin. "The Distinction Between Chastisement and Punishment (1)." (*LSB*) XVII-1: 1-3. O46

Scharf, Erwin. "The Distinction Between Chastisement and Punishment (2)." (*LSB*) XVII-2: 1-4. D46

Scheuerlein, Don. "Teaching Children to Pray." (*TLE*) XXIX-3: 63-68. F89

Schuetze, Armin. "Use of Modern Bible Translations in Our Classrooms." (*TLE*) XIII-4: 4-7. My73

Schulz, Reuel. "Most Important Little Word, A." (*TLE*) XV-4: 4-5. My75

Sievert, Hertha. "Evaluation Of Our Teaching of Bible Stories, An." (*TLE*) II-2: 4-5. D61

Sievert, Walter. "Bible Reading in Our Schools." (*TLE*) V-3: 6-7. F65

Starr, Laurie. "Pray the Day Away." (*LP*) V-5:10-11 May/June 1998

Stindt, A.C. "I Tell You that ... Luke 19:40 (part 1)." (*LSB*) XI-1: 4-5. S40

Stindt, A.C. "I Tell You that ... Luke 19:40 (part 2)." (*LSB*) XI-2: 3-4. D40

Vogel, Heinrich. "Noah's Curse." (*TLE*) XXVI-2: 19-21. D85

Warnke, Harold. "A Survey of Lutheran High School Religion Courses." (*TLE*) I-1: 9-10. O60

Wegner, Walter. "Vasteras for Variety." (*TLE*) I-1: 12-13. O60

Woldt, Michael. "Question and Answer." (*LP*) V-5:13 May/June 1998

Wulff, Frederick. "The Parallels Between Islam and Mormonism." (*TLE*) XLIII-3: 110-115 My03.

## Resignations

Ahlswede, Eugene. "Resignations." (*TLE*) XXV-1: 10-12. O84

Schaller, Loren. "Some Thoughts on the Call." (*TLE*) XII-2: 15-16. D71

Stroh, Elton. "Planning to Avoid Burnout." (*PL*) I-1: 12-13. N92

Tiefel, James. "Must Frustration Lead to Resignation?" (*TLE*) XXIX-1: 18-23. O88

## Sanctification

Beres, Pamela Holtz. "They Want, We Want, I Want, God Wants." (*LP*) X-3: 4-5 Ja/Fe 03.

## School Enrollment

Anonymous. "School Statistics." (*TLE*) I-2: 20-23. D60

Anonymous. "Protestant Elementary Schools." (*TLE*) I-3: 22-23. F61

Anonymous. "School Enrollments." (*TLE*) II-2: 22-23. D61

Anonymous. "School Enrollments." (*TLE*) III-2: 24. D62

Anonymous. "Christian Day Schools in Synod." (*LSB*) IV-1: 2-3. O33

Anonymous. "School Enrollments." (*TLE*) IV-2: 24. D63

Anonymous. "Church-Related Elementary Schools 1963-64." (*TLE*) IV-3: 21-22. F64

Anonymous. "Synodical School Enrollments." (*TLE*) IX-2: 22. D68

Anonymous. "Church-Related Elementary/Secondary Schools." (*TLE*) IX-3: 21-23. F69

Anonymous. "Synodical School Enrollments." (*TLE*) V-2: 23-24. D64

Anonymous. "Lutheran High School Enrollments." (*TLE*) VI-2: 19. D65

Anonymous. "Church-Related Elementary/Secondary Schools." (*TLE*) VII-3: 14-15. F67

Anonymous. "School Enrollments." (*TLE*) VIII-2: 22-24. D67

Anonymous. "The Statistics Speak." (*LSB*) VIII-4: 6. My38

Anonymous. "School Statistics." (*TLE*) X-2: 22. D69

Anonymous. "Church-Related Elementary/Secondary Schools." (*TLE*) X-3: 14-15. F70

Anonymous. "School Statistics." (*TLE*) XI-2: 22-23. D70

Anonymous. "School Statistics." (*TLE*) XII-2: 5,9,14. D71

Anonymous. "School Enrollments." (*TLE*) XIII-2: 6. D72

Anonymous. "School Enrollment." (*TLE*) XIV-2: 22-24. D73

Anonymous. "School Statistics." (*TLE*) XIX-2: 24. D78

Anonymous. "School Statistics 1974-1975." (*TLE*) XV-2: 5. D74

Anonymous. "Growth in Our Schools." (*TLE*) XVI-2: 4-5. D75

Anonymous. "Synodical School Enrollments School Statistics 1976-77." (*TLE*) XVII-2: 21-22. D76

Anonymous. "School Statistics 1977-78." (*TLE*) XVIII-2: 23-24. D77

Anonymous. "School Statistics." (*TLE*) XX-2: 24. D79

Anonymous. "Christian Day School and Lutheran. High School. Statistics. 1980-81." (*TLE*) XXI-2: 24. D80

Gieschen, Daniel. "Suggested School Enrollment Policies for Non-member Children." (*TLE*) XI-2: 12-15. D70

Isch, John. "Gains and Losses in WELS Lutheran Elementary Schools." (*TLE*) XXXVII-4: 114-121 M97

Kolander, Donald. "Looking for Opportunities." (*LL*) XI-3: 26-27 Sp03.

Willems, Paul. "Firming the Foundations." *(TLE)* XXVI-4: 4-8. My86

## Science

Albrecht, R.M. "Book Chat." *(LSB)* III-3: 6. F33  
 Anderson, Robert. "Celebrate Earth Day." *(LP)* III-4: 4-5. Mar/Apr 96  
 Anonymous. "Teaching Christian Attitudes Toward Sex." *(TLE)* X-2: 10-11. D69  
 Ash, Richard. "Biology—The Study of Life." *(TLE)* XII-3: 23. F72  
 Averbeck, Robert. "Nature Crafts." *(TLE)* XI-2: 6-7. D70  
 Boehlke, Paul. "Honest Weight—No Springs." *(TLE)* XIV-3: 20-21. F74  
 Boehlke, Paul. "Nature of Science: Implications for Creationists, The." *(TLE)* XVIII-4: 8-10. My78  
 Boehlke, Paul. "Dinosaurs, God's Creatures Part I." *(TLE)* XXXI-3: 52-57. F91  
 Boehlke, Paul. "Dinosaurs: God's Creatures Part 2." *(TLE)* XXXI-4: 76-80. My91  
 Buck, Emily. "Science in Mind's Eye". XLVII-4: 120. M07. (TLE).  
 Eckert, Paul. "Concordia Sex Education Series, The." *(TLE)* X-3: 22-24. F70  
 Festerling, Roger. "God's Stuff." *(LP)*, IV-6:12-13 July/Aug 1997  
 Foelske, Wayne. "Integration of Computers in the Science Classroom." *(TLE)* XXIX-4: 82-90. My89  
 Frutiger, Grace. "Work of Thy Fingers, The." *(TLE)* XI-2: 4-5. D70  
 Fuhrmann, C.G. "First Aid." *(LSB)* X-4: 4-5. My40  
 Glaeske, Kevin. "The Design of God in a Rose". XLIV-4: 110-112, M04. (TLE).  
 Goede, Harold. "The Science Corner." *(LSB)* XXIX-2: 6-7. D58  
 Golisch, David. "Lutheran Science Institute." *(TLE)* XV-4: 17-19. My75  
 Heckmann, George. "Teaching Conservation Effectively (1)." *(TLE)* III-1: 8-9. O62  
 Heckmann, George. "Teaching Conservation Effectively (2)." *(TLE)* III-2: 8-9. D62  
 Heckmann, George. "An Evaluation of Science Texts (Grades 7 and 8)." *(LSB)* XXI-2: 5-6. D50  
 Isch, John. "Always Know the Answer(?)." *(TLE)* XXXV-4: 111-112 My95  
 Jindra, Michael. "Aliens Among Us." *(LP)*V-3:6-8 Jan/Feb 1998  
 Knoke, Arline. "Science in the Primary Grades (1)." *(LSB)* XXII-1: 2-5. O51  
 Knoke, Arline. "Science in the Primary Grades (2)." *(LSB)* XXII-2: 2-4. D51  
 Koeninger, Ruth. "A Unit on Teeth." *(LSB)* XVI-1: 4. O45  
 Maier, Walter. "Sex Education." *(TLE)* X-2: 8-9. D69  
 Marggraf, Sara. "What Science Means to Me". XLVII-4:

126. M07. (TLE).  
 Martin, G. "Theories of Science in the Light of Scripture (1)." *(LSB)* XVII-3: 6-7. F47  
 Martin, G. "Theories of Science in the Light of Scripture (2)." *(LSB)* XVII-4: 3-6. My47  
 Merten, Stephen. "Spontaneous Combustion and Very Long-Range Lesson Plans". XLV-3: 94-96. F05. (TLE).  
 Mitchell, Robert. "Description in Science." *(TLE)* XIII-1: 10-11. O72  
 Moskop, A.A. "Safety Education." *(TLE)* I-1: 8-9. O60  
 Pape, W.A. "General Science." *(LSB)* XIII-3: 3-4. F43  
 Pelzl, Theo. "Suggested Experiments and Projects." *(LSB)* IV-1: 4-5. O33  
 Pelzl, Theo. "Book Chat." *(LSB)* IV-1: 5-6. O33  
 Raether, Carole. "Nature Studies In Winter." *(TLE)* VII-2: 6-7. D66  
 Rambow, Tim and Steven Thiesfeldt. "Establishing an Observation Bee Hive in the Classroom". XLV-4: 109-112. M05. (TLE).  
 Rendahl, Freida. "Sixteen Great Family Science Adventures." *(LP)*IV-6:14 July/Aug 1997  
 Sauer, Charlotte. "Spring Flowers for Your Pupils." *(LSB)* XV-4: 4-5. My45  
 Schaller, Ruth. "Do You Know Our Winter Birds?" *(LSB)* XV-2: 5. D44  
 Schmal, Mary. "The Heavens Still Declare the Glory of God." *(LP)* IX-6:6-7 July/Aug02  
 Schnitker, Heine. "Physical Sciences, The." *(TLE)* XII-3: 10. F72  
 Sievert, Erich. "What is New in Professional Books." *(LSB)* XXI-4: 2-4. My51  
 Sitz, Herbert. "Book Reviews." *(LSB)* II-1: 5. S31  
 Spaude, Luther. "Science in the Lutheran High School." *(TLE)* V-4: 11-13. My65  
 Sponholz, Martin. "Naturalist and the Scientist, The." *(TLE)* XVIII-4: 10-12. My78  
 Sponholz, Martin. "Not Always Positive". XLVI-2: 55. D05. (TLE).  
 Spurgin, Alan. "Developing a Science Unit with Limited Funds and Facilities." *(TLE)* XVII-2: 11-12. D76  
 Stindt, A.C. "Book Chat." *(LSB)* III-2: 6. N32  
 Stindt, A.C. "The Leaf." *(LSB)* XV-3: 4-5. F45  
 Tacke, Rachel. "Walk on the Wild Side." *(LP)* X-6: 4-5 Ju/Au 03.  
 Thiesfeldt, Steven. "The Use of Discrepant Events in Teaching Science." *(TLE)* XXXIV-1: 19-23 O93  
 Thiesfeldt, Steven. "The Use of Historical Vignettes in Teaching Science." *(TLE)* XXXIV-3: 90-92. F94  
 Thiesfeldt, Steven. "Using Demonstrations and an Observation Notebook to Teach Science Process Skills". XLVI-2: 45-48. D05. (TLE).  
 Wandersee, James. "Wait Time Research—Can it Help you Teach Science?" *(TLE)* XIX-4: 16-17. My79  
 Wandersee, James. "Let's Take a Science Field Trip!" *(TLE)* XXII-3: 11-13. F82

- Willems, Paul. "Attitudes and Safety in the Science Classroom." (*TLE*) XXXII-3: 87-91. F92
- Willems, Paul. "Poetry, Teaching, and Emotions." (*TLE*) XXXIX-2: 51-55 D98
- Willems, Paul. "Demonstrating God's Handiwork in His Creation." (*TLE*) XXXV-2: 40-43 D94
- Willems, Paul. "Science as Process." (*TLE*) XXXVIII-2 36-41 D97
- Willems, Paul. "Science as Philosophy." (*TLE*) XLIII-3: 70-72 F03.
- Willems, Paul. "A Model or Reality". XLIV-2: 58-61. D03. (*TLE*).

## Services

- Albrecht, Martin. "Choosing Proper Organ Music For the Church Service." (*TLE*) II-3: 13-15. F62
- Albrecht, Martin. "Choosing Proper Choir Music for the Church Service." (*TLE*) II-4: 16-18. My62
- Albrecht, Martin. "Becoming Acquainted With the Church Year." (*TLE*) III-1: 16-18. O62
- Albrecht, Martin. "Appropriate Music for the Marriage Service." (*TLE*) III-4: 18-19. My63
- Albrecht, Martin. "Our Liturgy a Living Thing?" (*TLE*) IV-3: 15-17. F64
- Albrecht, Martin. "What Are We Doing to Improve Ourselves?" (*TLE*) V-1: 21-23. O64
- Albrecht, Martin. "Music—a Gift of God?" (*TLE*) VIII-2: 16-18. D67
- Albrecht, Martin. "What is Proper Church Music?" (*TLE*) X-4: 15-17. My70
- Albrecht, Martin. "Are We Acting Wisely in Our Wedding Practices?" (*TLE*) XIII-2: 19-21. D72
- Backer, Bruce. "Honey to Your Mouth." (*TLE*) V-3: 16-17. F65
- Backer, Bruce. "Let the Glory of the Lord Dwell Richly Among Our Children." (*LSB*) XXIX-4: 1-6. My59
- Eggert, Kurt. "The Reformation Festival." (*TLE*) VII-4: 21-23. My67
- Fischer, Gervasius. "The Children's Christmas Eve Service." (*TLE*) I-2: 14-17. D60
- Fischer, Gervasius. "The Children's Christmas Eve Service." (*LSB*) XI-2: 1-2. D40
- Gurath, Beverly. "Good Friday Children's Services." (*TLE*) XX-2: 22-23. D79
- Koeplin, Kurt. "The Mission Festival." (*TLE*) V-1: 18-20. O64
- Kolander, Kenneth. "Sunday School and the Christmas Service, The." (*TLE*) XIV-2: 14-15. D73
- Marowsky, Lawrence. "Service Playing: Funerals." (*TLE*) XVII-3: 19-20. F77
- Meyer, Edward. "Exciting Times in Church Music." (*TLE*) XXIV-1: 9-11. O83
- Nolte, Waldemar. "What Music is Good to Use for Christian Worship?" (*TLE*) V-4: 17-18. My65

- Petermann, Kurt. "A Children's Reformation Service." (*TLE*) XXIII-1: 6-8. O82
- Prange, Joel. "A Palm Sunday Alternative." (*TLE*) XXVIII-2: 31-32. D87
- Prange, Mary. "Service Playing: Wedding Music." (*TLE*) XVII-3: 21-23. F77
- Schaller, Egbert. "Is There Room for Improvement in Our Children's Christ Eve .." (*LSB*) XXI-2: 1-2. D50
- Scharf, Erwin. "The Ascension Festival Service." (*LSB*) XXIII-3: 1-2. F53
- Sievert, Erich. "Are the Hymn Numbers Ready?" (*LSB*) XXIII-4: 16. My53
- Trettin, Emil. "Are Our Commencement Programs Worthy of Our High Aims?" (*LSB*) XIII-3: 2-3. F43

## Singing

- Ahlswede, Eugene. "Sing, Christian, Sing." (*TLE*) XXVII-3: 1-2. F87
- Albrecht, Martin. "What is Happening to Our School Music Course?" (*TLE*) II-1: 12-14. O61
- Albrecht, Martin. "How Well are My School Children Singing?" (*TLE*) VIII-3: 20-22. F68
- Albrecht, Martin. "Praise God From Whom All Blessings Flow." (*TLE*) XIV-3: 10-12. F74
- Averbeck, Robert. "I Hear America Singing." (*TLE*) X-3: 6-7. F70
- Backer, Emil. "Music Review." (*LSB*) VII-2: 6-7. D36
- Bartel, Fred. "Part-singing." (*TLE*) XX-3: 20-22. F80
- Bartel, Fred. "Getting Ready for Part-Singing." (*TLE*) XXV-3: 7-8. F85
- Fehlauer, Adolph. "Children Can Be Taught to Sing." (*TLE*) XIV-4: 17-21. My74
- Gerlach, Jackie. "Teaching Children to Sing on Pitch." (*PL*) IV-3: 28-29 Su96
- Gerlach, Jackie. "Singing for Worship: Cognitive and Affective Outcomes." (*TLE*) XL-2: 36-39 D99
- Hagedorn, Grace. "Learn to Sing in Six Easy Lessons." (*TLE*) XVIII-4: 13-14. My78
- Klatt, Harold. "Beginning Part Singing." (*LSB*) XII-2: 4-5. D41
- Meyer, Edward. "Junior Choirs." (*TLE*) XIX-1: 15-17. O78
- Meyer, Edward. "Teachers Speak on Music in the Upper Grades." (*TLE*) XV-2: 15-18. D74
- Meyer, Edward. "Development of the Adolescent Male's Singing Voice, The." (*TLE*) XVIII-2: 17-19. D77
- Meyer, Edward. "Research Into the Problem of Monotonism." (*TLE*) XXII-1: 21-23. O81
- Moeller, Linda. "Do You Look for the Lord? (song)." (*PCE*) I-3: 42-43. Wi89
- Moeller, Linda. "Give Thanks To God (Song)." (*PCE*) II-2: 32. Fa90
- Moeller, Linda. "No One Loves Me More Than Jesus (Song)." (*PCE*) II-3: 48. Wi90
- Nolte, Carl. "Everyone Can Sing." (*LL*) V-2: 28-29 Wi97

- Petermann, Kurt. "Singing! Are We Losing It?" (*TLE*) XXII-2: 16-18. D81
- Pfeifer, Mike. "Motivation and Interest in the High School Choral Program:." (*TLE*) XXI-1: 17-19. O80
- Sawatske, Laurie. "Teaching Children How to Sing" (*PCE*) I-3: 38-39. W189
- Schierenbeck, James R. "Helping the Uncertain Singer." (*TLE*) XXXIII-2: 52-53. D92
- Sitz, Herbert. "How About Singing?" (*LSB*) I-3: 3. n.d.31

## Slow Learners

- Esmeier, James. Mephibosheth Who?" (*LL*). VII-3: 22-23 Sp99
- Hellermann, William. "Our Backward Pupil (1)." (*TLE*) XII-2: 10-11. D71
- Hellermann, William. "Our Backward Pupil (2)." (*TLE*) XII-3: 11-14. F72
- Hellermann, William. "Our Backward Pupil (3)." (*TLE*) XII-4: 10-12. My72

## Social Studies

- Ahlswede, Eugene. "God Bless our Native Land." (*TLE*) XXI-1: 2-4. O80
- Anonymous. "Proposed Objective Test on Europe." (*LSB*) II-1: 8. S31
- Anonymous. "A Unit in Geography." (*LSB*) XXIII-1: 7-8. O52
- Anonymous. "A Unit on Geography (2)." (*LSB*) XXIII-2: 3-6. D52
- Averbeck, Julia. "Primary Grades Salute the Bicentennial, The." (*TLE*) XVI-3: 7-8. F76
- Fredrich, Edward. "Key Chore of a Key Course in Secondary Social Studies." (*TLE*) IV-2: 9-11. D63
- Hartwig, Theodore. "Teaching About the Past: Its Sameness and Its Otherness." (*TLE*) XVII-4: 2-3. My77
- Heckmann, George. "Role of the Unit Method in Teaching Social Studies." (*TLE*) IV-2: 5-6. D63
- Heidtke, Earl. "Bringing a Global View to the Classroom." (*TLE*) XXXVIII-3: 68-71 F98
- Isch, John. "Explorers." (*TLE*) XVII-3: 14-15. F77
- Kirschke, E. "Wheat: A Type Study in Geography for Upper Grades." (*LSB*) X-2: 4-5. D39
- Klatt, H.R. "Book Chat." (*LSB*) III-1: 6. O32
- Klatt, H.R. "An Approach to Foreign Affairs Since 1900 From a Christian .." (*TLE*) V-3: 20-22. F65
- Klatt, H.R. "Be Not Conformed to this World in Teaching the Social Studies." (*LSB*) X-3: 2-3. F40
- Klatt, H.R. "Does Geography Influence History?" (*LSB*) XIX-1: 2-3. O48
- Krause, E.F. "What Information Should the Pupil Gather From a Map?" (*LSB*) XIII-3: 4-5. F43
- Kremer, Kenneth. "Survival Quarter (part 1)." (*TLE*) XXV-1: 19-22. O84

- Kugler, Robert. "Energy Crisis, The—A Call to Stewardship." (*TLE*) XXI-2: 22-23. D80
- Lanphear, Gerald. "Try the Newspaper." (*TLE*) XVI-4: 7-9. My76
- Manthey, Irene. "Social Studies in the Kindergarten." (*TLE*) I-4: 8-9. My61
- Meyer, Marietta. "What Are We Doing About Map Study? (1)." (*TLE*) V-3: 4-5. F65
- Meyer, Marietta. "What Are We Doing About Map Study? (2)." (*TLE*) V-4: 4-5. My65
- Paap, Irma. "Effective Utilization of the Social Studies Text." (*TLE*) XII-1: 8-9. O71
- Sauer, Alfred v. Rohr. "Lutheran Education in the World Today." (*LSB*) XVIII-3: 2-7. F48
- Schaller, Loren. "Communism in Education—A Brief Glance." (*TLE*) II-3: 2-3. F62
- Schaller, Ruth. "We Are in Holland." (*LSB*) IX-2: 5-6. D38
- Schmeling, Daniel. "Why Economics?" (*TLE*) XIV-1: 14-16. O73
- Schmeling, Daniel. "What Economics?" (*TLE*) XIV-2: 16-19. D73
- Schmeling, Daniel. "Keeping Our Classrooms Current." (*TLE*) XIX-2: 13-14. D78
- Schmeling, Daniel. "Which is the Right Side?" (*TLE*) XXII-4: 11-13. My82
- Schroeder, David. "Oral History As a Teaching Approach in Secondary Schools." (*TLE*) XXVII-1: 11-14. O86
- Sievert, Hertha. "A Geography Lesson for Third and Fourth Grade." (*LSB*) XI-1: 5. S40
- Sitz, Herbert. "Book Chat." (*LSB*) II-3: 5. J32
- Sitz, Herbert. "Super-Enthusiasm." (*LSB*) III-1: 4-5. O32
- Sitz, Herbert. "Values of the CDS in Preparing the Pupil For His Place in Cm." (*LSB*) VIII-1: 1-3. S37
- Sonntag, Craig. "Survival Skills: A real-world Simulation." (*TLE*). XLI-2: 38-39 D00
- Steinbrenner, Dennis. "Stock Market Simulation." (*TLE*). XLI-1: 10-13 O00
- Steinbrenner, Dennis. "Skill- and Content-Based Social Studies Curriculum, A." (*TLE*) XIX-4: 17-20. My79
- Stindt, A.C. "Book Reviews." (*LSB*) II-1: 5. S31
- Stindt, A.C. "Book Reviews." (*LSB*) II-2: 5. N31
- Stindt, A.C. "Book Chat." (*LSB*) II-4: 5. Mr32
- Wessel, Howard. "Preparation for Reading in Social Studies." (*TLE*) XII-2: 6-7. D71
- Wobeck, Clyde. "Teaching Responsible Citizenship." (*TLE*) VIII-2: 6-7. D67
- Wulff, Frederick. "A Good Social Studies Textbook." (*TLE*) XXXIV-1: 27-32 O93
- Wulff, Frederick. "Weaknesses in Social Studies Textbooks." (*TLE*) XXXIV-4: 121-128 My94
- Wulff, Fred. "The Controversy Over Standards". XLV-1: 6-10. O04. (*TLE*).
- Wulff, Frederick. "Teaching Social Studies Without a Negative Paradigm". XLV-2: 50-54. D04. (*TLE*).
- Wulff, Frederick. "Sociology With an S (Like in Sin) ". XLV-2: 50-54. D04. (*TLE*).

XLVI-2:38-44. D05. (TLE)..

Wulff, Frederick. " 'Christian Politics': The Best For Both Worlds". XLVII-1: 6-10. O06. (TLE).

Yarbrough, Kristine. "United We Stand." (TLE) XXXV-1: 23-24 O94

## Speech

Bailey, Darleen. "Primary Language Arts." (TLE) III-3: 4-5. F63

Engel, Natalie. "Speech Without Fear." (TLE) II-2: 17-18. D61

Franzmann, Werner. "I Mustof done it Accidentally—It's only Your Mother Tongue.." (TLE) III-2: 17-18. D62

Franzmann, Werner. "Vereh Clevah, Meh Deah! Pompositos of Speech and Related P." (TLE) III-3: 19-21. F63

Gentz, Marlene. "Speech and Dramatics Are Not Frills." (TLE) XV-4: 8-10. My75

Juern, John. "Th-th-that's all normal folks." (LP). VII-5: 5 May/June00

Knippel, Robert. "How You Say It is as Important as What you Say." (LP) IX-5: 6-7 Ma/Ju 02

Leyrer, Philip. "Truths About Tones." (TLE). XLI-3: 67 F01

Manthey, Frederick. "Improving Our Gift of Speech." (TLE) IX-3: 11-12. F69

Sievert, Hertha. "Speech Correction for Our Children." (TLE) IV-1: 4-5. O63

Sievert, Hertha. "Case History of Speech Correction, A." (TLE) IV-2: 4. D63

## Spelling

Anonymous. "Religious Words for Spelling." (LSB) XXVII-2: 6. D56

Averbeck, Robert. "Personalized Approach to Spelling, A." (TLE) XI-1: 11-12. O70

Fenske, Louise. "How I Teach My Second Grade Pupils to Spell." (LSB) VIII-3: 6. F37

Franzmann, Werner. "I Mustof done it Accidentally—It's only Your Mother Tongue.." (TLE) III-2: 17-18. D62

Hagedorn, Fred. "Spelling Religious Words." (LSB) XXIV-2: 7. D53

Hagedorn, Fred. "Religious Spelling Words." (LSB) XXIV-4: 7. My54

Hagedorn, Grace. "First Word, The." (TLE) XXIII-2: 18-20. D82

Sitz, Herbert. "Book Reviews." (LSB) II-2: 5. N31

Sitz, Herbert. "Book Chat." (LSB) III-3: 6. F33

Trettin, Emil. "Challenging Superior Spellers." (LSB) XXX-2: 4-6. D59

Wessel, Howard. "Some Thoughts on Spelling Motivation." (TLE) XI-2: 8-9. D70

Willems, Paul. "The L Speaks". XLIV-4: 123-124, M04.

(TLE).

## Stewardship

Ahlswede, Eugene. "Let's Talk About Salary." (TLE) XXVI-II-4: 18-21. O87

Beres, Pamela. "Kids in the Money Maze." (LP) VI-3: 7-8 Jan/Feb 99

Barber, John. "The Church's Advertising Budget." (LL). IX-3:20-21 Sp01

Becker, Bruce. "God's Stewards." (LL). IX-3:14-17 Sp01

Becker, Bruce. "The Earth is the Lord's." (LL). IX-3:18-19 Sp01

Clark, David. "Overflowing Thanks to God." (PL) IV-1: 12-13 Fa95

Ebert, Kurt. "Teaching Stewards Through Video." (PL) IV-1: 14-15 Fa95

Godfrey, William. "Christian Stewardship Training." (TLE) IX-4: 5-7. My69

Hering, Thomas. "Paying the Bills." (LL) VI-6:24-25 Spr98

Hochmuth, Robert. "Creative Spelling." (TLE) XVIII-4: 2-4. My78

Kieta, Geoffrey. "On Being Stewards of Our Old Age." (TLE) XXXIX-1: 10-12 O98

Kieta, Geoffrey. "WELS Words: Stewardship." (TLE) XLII-3:85-87 F01

Koschnitzke, Gary. "Raising Funds Outside." (LL). IX-3:28-29 Sp01

Kremer, Kenneth. "Survival Quarter (part 1)." (TLE) XXV-1: 19-22. O84

Kremer, Kenneth. "Survival Quarter (part 2)." (TLE) XXV-2: 12-16. D84

Kugler, Robert. "Energy Crisis, The—A Call to Stewardship." (TLE) XXI-2: 22-23. D80

Lenz, Mark. "Stewardship is For Adults, Right?" (TLE) XXXI-2: 41-46. D90

Martin, Carla. "Cyber Stewards." (LL). IX-3:24-25 Sp01

Mueller, Wayne. "Leadership: Money Talk." (LL) VII-1: 31 Fa98

Oldfield, John. "Developing Pride in Your Campus." (TLE) XXIII-1: 18-20. O82

Petermann, Kurt. "Parental Dropout." (TLE) XXVI-4: 15-17. My86

Riediger, Norman. "Planning Your Synod Mission Offering." (PL) I-2: 9. Sp93

Schaller, Loren. "Pollution." (TLE) XI-1: 13-15. O70

Schmeling, Daniel. "Why Economics?" (TLE) XIV-1: 14-16. O73

Schultz, Tony. "Dollars and Sense." (LP) III-3: 8-9. Jan/Feb 96

Stenzenbach, Terry. "The Time-management Two-step." (LP) V-2:15-16 Nov/Dec 1997

Vaccarella, Lee. "Grow in the Grace of Giving." (PL) II-2: 40-41 Sp94

Warnke, Harold. "Unsung Hero." (*TLE*) V-3: 8-10. F65

## Study Skills

Helwig, Donald. "Content vs. Study-skills." (*TLE*) XX-2: 12-14. D79

Johnson, Lucille. "Improving Study Habits." (*TLE*) II-3: 22. F62

Peikert, Ruth. "Step One—Readiness." (*TLE*) XVIII-1: 8-9. O77

Treder, Alan. "Let's Teach Good Study Habits." (*TLE*) XVIII-1: 23-24. O77

Wessel, Howard. "Teach them Note-Taking." (*TLE*) XIII-2: 9-10. D72

Willems, Paul. "Is Anyone Out There Teaching Them How to Study?" (*TLE*) XIX-2: 15-17. D78

## Sunday School

Angle, Kay. "Relationships: The Teacher and the Child." (*PL*) II-2: 8-9 Sp94

Anonymous. "Sunday School Superintendent." (*PCE*) I-3: 41. W89

Anonymous. "The New Sunday School Course." (*TLE*) V-2: 19-20. D64

Bakken, Debra. "Relationships in the Sunday School (4): The Congregation and." (*PL*) IV-2: 31-32 Sp96

Borchardt, Paul. "Study Missions in Sunday School?" (*TLE*) IV-2: 15-17. D63

Braun, John. "Follow Up: An Interview with Dave Zubke." (*LL*). VIII-3: 14-17 Sp00

Braun, Mark. "God So Loved the World — A Review." (*TLE*) XXII-4: 5-7. My82

Czer, Ramona. "Palest Ink: Record Keeping for Sunday Schools." (*PCE*) I-4: 52-53. Sp90

Czer, Ramona. "Relationships in the Sunday School (2)." (*PL*) III-3: 46-47 Su95

Danner, Lauren. "A Christmas Eve Service in a Small Sunday School." (*PCE*) III-2: 30-31. Fa91

Degner, Steven. "Summer Sunday School." (*PCE*) II-4: 53. Sp91

Fehlauer, Adolph. "New Sunday School Course, The." (*TLE*) VIII-2: 14-15. D67

Fellers, Debra. "Relationships in the Sunday School (1)." (*PL*) III-2: 14-15 Sp95

Fenske, Siegfried. "Why a Sunday School Teachers' Training Course." (*TLE*) I-2: 12-13. D60

Fischer, William. "Why a Separate Beginners' Course in Sunday School?" (*TLE*) XIII-4: 19-20. My73

Fischer, William. "Evaluating Religious Materials." (*TLE*) XIX-4: 5-7. My79

Fischer, William. "Are You a Part-time Worker?" (*TLE*) XV-3: 16-18. F75

Fischer, William. "Are We Short-changing the Sunday School?" (*TLE*) XX-4: 5-7. My80

Fischer, William. "Cradled in His Arms' Some Questions and Answers." (*TLE*) XXVI-1: 5-6. O85

Franzmann, Thomas. "They Serve Behind the Scenes—Sunday School Teachers." (*TLE*) XXVI-4: 19-20. My86

Gerlach, Joel. "Home and the Sunday School, The." (*TLE*) VI-4: 10-12. My66

Griepentrog, Darlene. "Spreading the World: Sunday Schools are For Nurture and Evan." (*PL*) IV-3: 7-8 Su96

Groth, Lynn. "Start Off on the Right Foot in the Fall." (*PCE*) I-1: 11. Su89

Groth, Lynn. "How Sunday Schools Can Help Parents." (*LL*)V-4:25-27 Su97

Gruenewald, Cindy. "Our Friends Next Door." (*LL*)V-2:18-19 W97

Hagedorn, Harold. "Sunday School Children From Unchurched Homes—Follow-up." (*PCE*) II-2: 23-24. Fa90

Hagedorn, Harold. "Following Up on Unchurched Sunday School Children." (*PL*) III-1: 28-29 Fa94

Hatzung, Michael. "Sunday School: A Mission Arm of the Church." (*PCE*) II-1: 10-11. Su90

Hochmuth, Robert. "Sunday School Teachers, Your Ministry Does Make a Difference." (*PCE*) I-1: 3-4. Su89

Hochmuth, Robert. "SS + WBS = SS x 2." (*TLE*) X-3: 12-14. F70

Janke, Martin. "Let's Put Away the Crayons!." (*TLE*) VII-2: 16-18. D66

Janke, Paul. "Relationships in the Sunday School (3): The Pastor and the C." (*PL*) IV-1: 45-46 Fa95

Janke, Philip. "Our Part-Time 'Mission Arms'—Are They as Strong ... Could." (*TLE*) VI-3: 14-15. F66

Janke, Philip. "What Spiritual Gifts Should a Sunday School Teacher Seek....." (*TLE*) VII-1: 19-21. O66

Jeske, Mark. "And What of the Sunday School Anyway?" (*TLE*) XXIII-2: 21-24. D82

Jeske, Mark. "Summer's Dilemma: To Teach or Not to Teach." (*TLE*) XXIV-4: 17-18. My84

Kastens, Gerald. "Sunday School Tomorrow." (*LL*) VI-6:26-27 Su98

Kastens, Gerald. "Life and Bible Times: Finding Freshness." (*PL*) III-1: 24-25 Fa94

Kastens, Gerald. "WELS Sunday Schools: 'Let the Children Come'." (*PL*) III-2: 16-17 Sp95

Kastens, Gerald. "Sunday School Teachers Share God's Promise." (*PL*) IV-3: 4-5 Su96

Kastens, Gerald. "Sunday School is Everybody's Business." (*TLE*) XXXVII-2: 42-45 D96

Kastens, Gerald. "Smooth Sailing or Aimless Drifting." (*LL*)V-4:18-20 Su97

Kastens, Jerry. "The Sunday School Story." (*LL*). VIII-2:24-25 W100

Kastens, Gerald. "Sunday School—Who's Going to Do Something About It?" (*TLE*)XXXVIII-2:61-64 D97

Klemp, Douglas. "The Sunday School Superintendent and

- the Child.” (*PCE*) III-2: 25-26. Fa91
- Klemp, Douglas. “Relationships in the Sunday School (5): The Sunday School Superintendent.” (*PL*) IV-3: 9-10 Su96
- Koester, Robert. “Tonight’s Meeting Was Worth Attending.” (*PL*) IV-1: 51 Fa95
- Kolander, Kenneth. “Sunday School and the Christmas Service, The.” (*TLE*) XIV-2: 14-15. D73
- Kom, Reinhart. “Direct Bible Study in the Sunday School.” (*TLE*) XX-2: 7-8. D79
- Loftin, R.Bowen. “Recruiting the Reluctant.” (*PCE*) III-3: 46-47. Wi91
- Loftin, R.Bowin. “The Melting Pot Classroom: LES and Public School Children.” (*PCE*) II-3: 46-47. Wi90
- Maas, Gale. “Suggested Procedures at Sunday School Teachers’ Meetings.” (*TLE*) IV-1: 12-13. O63
- Mose, Jane. “Special Sunday School.” (*LL*). VIII-3: 22-23 Sp00
- Mueller, Wayne. “The Sunday School Teacher’s Call.” (*PL*) IV-3: 6 Su96
- Nelson, Joel. “Revitalizing Your Sunday School (1).” (*PL*) II-2: 6-7 Sp94
- Nelson, Joel. “Revitalizing Your Sunday School (2).” (*PL*) II-3: 37-38 Su94
- Nelson, Joel. “Revitalizing Your Sunday School Part 1.” (*PCE*) III-1: 8-9. Su91
- Nelson, Joel. “Revitalizing Your Sunday School Part 2.” (*PCE*) III-2: 28-29. Fa91
- Nelson, Joel. “Revitalizing Your Sunday School Curriculum.” (*PCE*) III-3: 36-37. Wi91
- Olson, Lawrence + Tullberg. “Still Hungry!.” (*TLE*) XXVII-1: 3-4. O86
- Olson, Mary. “Parental Involvement: Sowing the Seeds.” (*PL*) I-2: 50-51 Sp93
- Olson, Mary. “Parental Involvement: Informing, Involving, and Educating.” (*PL*) II-1: 34-35 Fa93
- Paap, Irma. “Practical Teaching Aids for Teaching the Story of God’s Love.” (*TLE*) XVII-1: 20-22. O76
- Pieper, Donald. “I Remember My Sunday School Teacher.” (*PCE*) III-1: 4-5. Su91
- Puhl, Warren. “The Sunday School Superintendent: The Results of a Survey.” (*PCE*) II-2: 22-23. Fa90
- Raabe, John. “The Sunday School Teacher’s Institute.” (*TLE*) II-3: 16-17. F62
- Rathke, Ronald. “Prepared to Prepare?” (*TLE*) XIII-3: 19-21. F73
- Ricke, Mark. “I Learned It All in Sunday School.” (*LP*) X-3: 28-31 Ja/Fe 03.
- Ricker, Myra. “The Joy of Sunday School.” (*LL*). VII-4: 28-29 Su99
- Ristow, August. “Alternatives to Sunday School.” (*PL*) II-3: 36,41 Su94
- Ristow, August. “Is Sunday the Best Time for Sunday School?” (*PCE*) II-3: 38-39. Wi90
- Ruege, Paul. “Your Sunday School Teachers Meeting—A Golden Opportunity.” (*TLE*) VIII-3: 12-14. F68
- Sawatske, Laurie. “Teaching Children How to Sing.” (*PCE*) I-3: 38-39. Wi89
- Sawatske, Laurie. “Parent’s Day for Sunday School.” (*PCE*) II-1: 16. Su90
- Sawatske, Laurie. “Keeping Good Order in the Sunday School Classroom.” (*PCE*) III-3: 44-45. Wi91
- Schroeder, Marlyn. “Problems of Rural Sunday Schools.” (*TLE*) I-3: 20-21. F61
- Schultz, Erhardt. “Day School Kids and The Other Kids.” (*TLE*) XVIII-1: 5-7. O77
- Schultz, Erhardt. “The Sunday School Teachers’ Meeting.” (*TLE*) XVIII-2: 5-7. D77
- Sonntag, Dorothy. “The First WELS Sunday School Convention.” (*PCE*) II-3: 35-37. Wi90
- Soukup, Paul. “A Satanic Summit of Sunday School.” (*PCE*) I-4: 55. Sp90
- Stadler, Richard. “Solo Mission or Team Challenge?” (*PCE*) I-2: 20-21. Fa89
- Stadler, Richard. “Is the Home Supporting Your Sunday School Effort?” (*PCE*) I-3: 40. Wi89
- Stern, Paul. “Teaching the Teacher.” (*PCE*) II-1: 12-13. Su90
- Stern, Paul. “The Sunday School and Its Infrastructure.” (*PL*) II-3: 41-42 Su94
- Tullberg, Helen. “What a Sunday School Teacher Expects from Teachers Meetings.” (*TLE*) II-2: 19-20. D61
- Tullberg, Paul + Olson. “Still Hungry!” (*TLE*) XXVII-1: 3-4. O86
- Valleskey, David. “Christian Day School and Sunday School.” (*TLE*) XIV-3: 5-6. F74
- Valleskey, Wilmer. “Let’s Look Ahead—and Plan Ahead.” (*TLE*) V-2: 13-15. D64
- Wendland, E.H. “They Sang Like Angels: Teaching Sunday School in the Africa.” (*TLE*) XVII-2: 13-15. D76
- Westendorf, Rolfe. “Who’s Minding the Sunday School?” (*TLE*) XV-1: 17-20. O74
- Worgull, David. “Individual Memory Course.” (*TLE*) XII-3: 15-17. F72
- Zahn, Ronald. “Role of the Sunday School Superintendent, The.” (*TLE*) XIX-3: 5-7. F79
- Zehms, Roger. “Sunday School Teachers’ Workshop: The Home-grown Variety.” (*PCE*) III-1: 6-7. Su91
- Zehms, Roger. “Discipline in the Sunday School Classroom.” (*TLE*) XXVII-2: 15-18. D86
- Zabel, David. “Grow Sunday School Teachers.” (*LL*) VI-3: 26-27 July/Aug98
- Zink, Waldemar. “Sunday School Conferences.” (*TLE*) XII-1: 16-17. O71
- Zubke, Dave. “Sunday School on Vacation?” (*LL*) X-2: 26-27 Wi 2002

## Supervision

- Anonymous. “The School Visitor.” (*TLE*) IV-3: 5. F64
- Anonymous. “Women Teacher Consultants.” (*TLE*) XIV-1:

- 9-11. O73
- Boll, Arlyn. "That Man Again." (*TLE*) XII-1: 10-12. O71
- Collyard, Larry. "Humanness in a Supervisory Capacity: You are a Person Also, ." (*TLE*) XXXVII-2: 46-50 D96
- Fehlauer, Adolph. "The School Visitors' Workshop." (*LSB*) XXX-2: 3. D59
- Gawrisch, Wilbert. "What About Women Visitors?" (*TLE*) VII-1: 2-6. O66
- Glende, Arthur. "A School Visitor's Gleanings (1)." (*LSB*) XXII-2: 7-8. D51
- Glende, Arthur. "A School Visitor's Gleanings (2)." (*LSB*) XXII-3: 6-7. F52
- Glende, Arthur. "A School Visitor's Gleanings (3)." (*LSB*) XXII-4: 8-9. My52
- Gruenhagen, Henry. "Getting Ready for the New School Year." (*LSB*) XXIX-4: 6-8. My59
- Hagedorn, Grace. "Why Did You Volunteer?" (*TLE*) XX-4: 13-14. My80
- Ihlenfeldt, H.O. "The New Member on Your Staff." (*LSB*) XXIX-4: 8-9. My59
- Kastens, Gerald. "Using Mentors With a New Teacher." (*TLE*) XXVIII-2: 37-38. D87
- Klein, Elsa. "Hello...Goodbye, Miss Young." (*TLE*) XIII-1: 4-5. O72
- Meyer, F.W. "Observations." (*LSB*) XII-1: 4. S41
- Plath, LeDell. "Some Major Changes After Forty Years." (*TLE*) XIV-1: 7-9. O73
- Plath, LeDell. "WELSSA". XLIV-4: 115-119, M04. (*TLE*).
- Plocher, John. "Introducing the Executive Secretary." (*LSB*) VII-1: 1. S36
- Sitz, Herbert. "The Minnesota Plan." (*LSB*) II-1: 2. S31
- Strohm, Philip. "A Program for the Improvement of Instruction." (*TLE*) XXIII-4: 12-13. My83
- Trettin, Emil. "Second Annual Workshop for School Visitors." (*LSB*) XXIX-2: 6. D58
- Trettin, Emil. "The First School Visitors' Workshop." (*LSB*) XXVIII-4: 6-7. My58
- Troge, Benjamin. "Effective Leadership and Supervision in Today's Schools". XLVII-3: 79-84. F07. (*TLE*).
- Warnke, Harold. "In-Service Training Course." (*TLE*) II-2: 10. D61
- Wessel, Howard. "Objective Observation of Teaching Behavior." (*TLE*) XIV-1: 12-13. O73
- Wessel, Howard. "Student-Teaching—a Brief Overview." (*TLE*) XVI-2: 11-12. D75
- Wessel, Howard. "Twenty-five Years of Cooperation." (*TLE*) XXIX-4: 91-94. My89

## Synod

- Bartz, Barb. "Information Please! ". XIII-1: 4-15 Fa04. (LL).
- Becker, Bruce. "Where Have All the People Gone?" (LL) XI-2: 4-5 Wi03.
- Braun, John. "Unconditional Gospel: An Interview with

- Paul Wendland." (LL) XII-3: 14-17 Sp04.
- Hunter, Randy. "No Reserves, Retreats, or Regrets." (LL) XII-1: 20-21 Fa03.
- Leyrer, Philip. "Who We Are." (*TLE*) XLIII-3: 67 F03.
- Schmal, Daniel. "Organized to Serve." (LL) IX-4:28-29 Su01

## Teachers

- Aaberg, Marie. "A Teacher's Trip to Washington." (*ELS*) I-3:5 Su98
- Ahlswede, Eugene. "Do They Know?" (*TLE*) XXI-2: 2-4. D80
- Ahlswede, Eugene. "Don't Be Weird." (*TLE*) XXI-4: 2-4. My81
- Ahlswede, Eugene. "The Relationship of Pastor and Teacher." (*TLE*) XXII-4: 2-4. My82
- Ahlswede, Eugene. "The Apple and the Rod." (*TLE*) XXIII-2: 4-5. D82
- Ahlswede, Eugene. "A Bouquet for My Lord." (*TLE*) XXVI-2: 9-10. D85
- Ahlswede, Eugene. "Ignorance Is No Sin." (*TLE*) XXVII-3: 2-3. F87
- Albrecht, Martin. "The Christian Teacher and the Parents." (*TLE*) IV-4: 7-9. My64
- Angle, Kay. "The Teacher and the Child." (*PCE*) III-2: 26-27. Fa91
- Anonymous. "Guidelines Relative to the Listing of Certified Teachers..." (*TLE*) I-4: 21-22. My61
- Anonymous. "Cooperation and Order." (*TLE*) II-3: 21. F62
- Anonymous. "The Christian Teacher and His Co-Workers." (*TLE*) IV-4: 12-14. My64
- Anonymous. "The Call: Procedures and Considerations." (*TLE*) IX-2: 21. D68
- Anonymous. "Regulations for Certification." (*TLE*) VI-2: 16-18. D65
- Anonymous. "Guidelines Relative to Teachers' Calls." (*TLE*) VI-2: 18-19. D65
- Anonymous. "Installation or Induction of Women Teachers." (*TLE*) VIII-2: 19. D67
- Arras, Florence. "Courtesy and Conduct of a Christian Teacher." (*TLE*) I-4: 4-7. My61
- Averbeck, Robert. "The Christian Teacher and His Preparation." (*TLE*) IV-4: 17-18. My64
- Bauer, Gerhard. "From a Principal to His Staff." (*TLE*) IX-1: 7. O68
- Becker, Bruce. "Share the Joy of Teaching." (LL)V-2:8-9 Wi97
- Berg, Linda. "The Single Teacher: Serving Singly." (*TLE*) XXXII-3: 81-84. F92
- Berger, Marie. "Positive Ways in Which the Teacher Can Influence the Growth." (*TLE*) XXV-2: 7-8. D84
- Bauer, Jackie. "The Effective Complaint." (*LP*)V-5:9. May/June 1998
- Boerneke, Leroy. "Education for Educators." (*TLE*) II-1: 2-

3. O61
- Boerneke, Leroy. "Broadening Intellectual Horizons." (*TLE*) XXIII-1: 22-24. O82
- Borchardt, Paul. "Did You Hear What Your High School Student Said?" (*TLE*) XIII-3: 15-18. F73
- Bushman, John. "Making Use of Leisure Time." (*LSB*) XXV-4: 8-11. My55
- Conference of Presidents. "Installation of Women Teachers." (*TLE*) IV-2: 22. D63
- CPS. "Teacher Call Activity, 1995." (*PL*) IV-1: 43 Fa95
- Czer, Ramona. "First Year Thanks!." (*TLE*) XXXIV-3: 94-96. F94
- Czer, Ramona M. "Everyday Heroes." (*TLE*) XXXIII-1: 24-25. O92
- Czer, Ramona. "Teachers are From Mars; Parents Are From Venus." (*TLE*) XXXVIII-3 91-93. F98
- Czer, Ramona. "Teachers Who Leave." (*TLE*) XXXVIII-4 118-120. My98
- Dorn, Owen. "The Single Teacher: Reaching Out to the Single." (*TLE*) XXXII-3: 84-86. F92
- Eickmann, Paul. "We Are Ambassadors." (*TLE*) I-4: 2. My61
- Eggers, William. "The Teacher's Reward." (*ELS*). VI: 3 Fa99
- Fenske, Siegfried. "Why a Sunday School Teachers' Training Course." (*TLE*) I-2: 12-13. D60
- Franzmann, Martin. "An Educational Ideal." (*LSB*) XI-3: 1-3. F41
- Gerlach, Joel. "Placard Parades and Assured Savings." (*TLE*) IX-2: 2-3. D68
- Gerlach, Joel. "Child in the Eyes of Parents and Teachers, The." (*TLE*) VIII-4: 2-3. My68
- Gerlach, Joel. "Teacher! About Your Call ...." (*TLE*) X-1: 2-3. O69
- Gerlach, Joel. "More About a Teacher's Call." (*TLE*) X-2: 2-3. D69
- Gerlach, Joel. "Closed-Circuit Triangular 'Space' Project, The." (*TLE*) XI-4: 2-4. My71
- Gerlach, Joel. "Being All Things to All Men." (*TLE*) XII-1: 2-3. O71
- Gieschen, Paul. "What Should the Teacher Read?" (*LSB*) VI-2: 5-6. D35
- Gieschen, Waldemar. "The Delightful Fruits of Our Teaching." (*LSB*) XXIII-1: 1-3. O52
- Glende, Arthur. "A School Visitor's Gleanings (1)." (*LSB*) XXII-2: 7-8. D51
- Glende, Arthur. "A School Visitor's Gleanings (2)." (*LSB*) XXII-3: 6-7. F52
- Glende, Arthur. "A School Visitor's Gleanings (3)." (*LSB*) XXII-4: 8-9. My52
- Greenfield, Gary. "Disadvantaged Child—Our New Frontier, The." (*TLE*) IX-4: 7-9. My69
- Greenfield, Sandra. "Extending the Classroom." (*TLE*) XX-3: 16-17. F80
- Groth, Lynn. "Recruiting for the Preaching and Teaching Ministry." (*TLE*) XXX-1: 4-6. O89
- Grunze, Richard. "A Necessary Choice." (*TLE*) VI-1: 2-4. O65
- Grunze, Richard. "A Necessary Choice." (*TLE*) XIV-1: 2-4. O73
- Haar, Susan; Carla Melendy. "Profiles of Ministry: The East Coast." (*TLE*) XXXII-4: 123-125. My92
- Habermann, Elwood. "Christian Teacher and his Calling, The." (*TLE*) IV-4: 2-3. My64
- Habermann, Elwood. "From a Pastor to All Teachers." (*TLE*) IX-1: 6. O68
- Heine, C.F. "The Dignity of the Child." (*LSB*) XII-1: 1-3. S41
- Hellermann, William. "Good Manners." (*LSB*) XIV-1: 3-5. S43
- Helwig, Donald. "Home Visitation." (*TLE*) XIX-4: 8-9. My79
- Helwig, Donald. "Parent School Visitation." (*TLE*) XX-1: 17-18. O79
- Helwig, Donald. "Do You Love Me?" (*TLE*) XX-3: 12-14. F80
- Holman, Cindi. "I Hate Fridays." (*LL*) XII-2: 24-25 Wi04.
- Hochmuth, Robert. "Sunday School Teachers, Your Ministry Does Make a Difference." (*PCE*) I-1: 3-4. Su89
- Hochmuth, Robert. "Breathing Heaven's Oxygen." (*TLE*) XX-2: 2-4. D79
- Hoepner, Walter. "A Teacher's Preparation for the Bible History Lesson." (*LSB*) XI-4: 2-3. My41
- Huebner, Lloyd. "The Holy Ghost is Our Teacher." (*TLE*) X-3: 16-18. F70
- Isch, John. "A Bulletin Board Suggestion." (*TLE*) XXXIX-1: 3 O98
- Isch, John. "The Single Teacher: Similarities & Differences." (*TLE*) XXXII-3: 80-81. F92
- Isch, John. "The Real World." (*TLE*) XXXIV-1: 3 O93
- Isch, John. "Finding Elisha." (*TLE*) XLII-1:3 O01
- Isch, John. "God is in the Details." (*TLE*) XXXVI-3: 67 F96
- Isch, John. "A Survey Regarding Teacher Graduates of Martin Luther College." (*TLE*) XXXVIII-3:75-90 F98
- Isch, John. "Are You Listening". XLIV-1:3. O03. (*TLE*).
- Janke, Philip. "What Spiritual Gifts Should a Sunday School Teacher Seek....." (*TLE*) VII-1: 19-21. O66
- Janke, Philip. "Qualifications for Religion Instructors in Secondary Schools." (*TLE*) XVI-1: 11-13. O75
- Kastens, Gerald. "You Haven't Changed a Bit!." (*TLE*) XXVIII-3: 63-64. F88
- Klatt, H.R. "Be Not Conformed to This World." (*LSB*) X-2: 2-3. D39
- Kretzmann, Carol. "Would You Teach in a Public School?" (*TLE*) II-4: 2-3. My62
- Krueger, Thomas. "Calling a Teacher." (*PL*) III-1: 21,23 Fa94
- Krueger, William. "The Christian Teacher and His Person." (*TLE*) IV-4: 10-11. My64
- Kuske, David. "Joy in Teaching—Teaching Joy." (*LL*) V-2:20-

- 23 Wi97
- Kuster, Thomas. "Jesus' Remarkable Claim of Divine Prerogatives." (*TLE*) XXIX-3: 61-62. F89
- Leinwander, Bernice. "Experienced Primary Teacher Begins Another Year, The." (*TLE*) IX-1: 8. O68
- Lenz, Mark. "If Not I...Who?" XLV-2: 55. D04. (TLE).
- Loftin, R.Bowen. "Recruiting the Reluctant." (*PCE*) III-3: 46-47. Wi91
- Lopahs, Martin. "The Other Side of the Academic Coin." (*TLE*) XXXII-1: 22-24. O91
- Maas, Gale. "Suggested Procedures at Sunday School Teachers' Meetings." (*TLE*) IV-1: 12-13. O63
- Manthey, W.H. "Professional Growth of the CDS Teacher: A Duty & a Necessity." (*LSB*) V-4: 2. Mr35
- McLean, Irma. "Sowers of the WORD." (*TLE*) XXXIV-4: 99 My94
- Melendy, Carl; Susan Haar. "Profiles of Ministry: The East Coast." (*TLE*) XXXII-4: 123-125. My92
- Meyer, F.W. "Do You Believe What You Say?" (*LSB*) XI-1: 3-4. S40
- Meyer, F.W. "Serving God's Happy People." (*TLE*) XI-3: 2-4. F71
- Meyer, F.W. "What Shall I Say?" (*LSB*) XVIII-4: 3-4. My48
- Meyer, John. "Profiles of Ministry." (*TLE*) XXXII-2: 59-61. D91
- Miller, Raymond. "What Parents Expect of Instructors." (*TLE*) IX-2: 12-13. D68
- Moeller, James. "Investment, Not a Cost." (LL) XI-4: 22-23 Su03.
- Needham, Dennis. "Improving Parent-Teacher Relationships." (*TLE*) XXIV-2: 19-21. D83
- Needham, Dennis. "Profiles of Ministry: The Caribbean." (*TLE*) XXXII-3: 72-76. F92
- Neimi, David. "Profiles of Ministry: The Inner City." (*TLE*) XXXII-4: 125-126. My92
- Nelson, Jason. "No Laughing." (LL) XI-1: 24-25 Fa02.
- Nelson, Joel. "Teach Me to Teach! ". XIII-1: 24-25 Fa04. (LL).
- Nolting, Paul. "Our Parochial School Teachers." (*LSB*) XIII-4: 5. My43
- Olson, Lawrence + Tullberg. "Still Hungry!." (*TLE*) XXVII-1: 3-4. O86
- Oswald, Kurt. "Books for the Teachers." (*TLE*) II-3: 18-19. F62
- Pape, Ronald. "Licorice Stick, The." (*TLE*) XI-3: 13-14. F71
- Petermann, Kurt. "A Sad Reflection." (*TLE*) XXII-3: 6-7. F82
- Pieper, Donald. "I Remember My Sunday School Teacher." (*PCE*) III-1: 4-5. Su91
- Plath, LeDell. "Teacher and Principal Assessment." (*PL*) III-1: 22-23 Fa94
- Plath, LeDell. "Twelve-Month Call for All Teachers." (*TLE*) XIII-3: 6-9. F73
- Plath, LeDell. "The WELS Calling Process for Teachers." (*TLE*) XXX-3: 64-68. F90
- Pope, James. "Christian Forget-me-nots? ". XLIV-2: 35. D03. (TLE).
- Price, Jane. "PTC." (*TLE*) XX-3: 18-19. F80
- Rathke, Ronald. "Prepared to Prepare?" (*TLE*) XIII-3: 19-21. F73
- Reich, Leanne. "A Letter to (New) Teachers." (*TLE*) XLIII-1: 5-10 O02.
- Reim, E. "The Proper Relationship Between Pastor and Teacher." (*LSB*) VI-3: 1-2. F36
- Rohda, Dudley. "My Kingdom is Not of This World." (*LSB*) XXIV-1: 1-4. O53
- Rude, Larry. "One Teacher's Story." (ELS) I-1: 4,7 Fa97
- Ruege, Paul. "Your Sunday School Teachers Meeting—A Golden Opportunity." (*TLE*) VIII-3: 12-14. F68
- Sauer, David. "Inexperienced Teacher and the New School Year, The." (*TLE*) IX-1: 9. O68
- Schaller, Adalbert. "E.G." (*LSB*) II-2: 1. N31
- Schaller, Loren. "Adolescent, His Pastor and Christian Teachers, The." (*TLE*) VIII-4: 15-17. My68
- Schneck, Jim. "Your Christian Philosophy, Your Legacy." (*ELS*) I-3:2 Sp98
- Schroeder, Martin. "On Being A Professional." (*TLE*) XXX-2: 27. D90
- Schroeder, Martin. "A Little Learning...A Dangerous Thing." (*TLE*) XXXII-3: 67. F92
- Schultz, Dennis. "Call For Your Reactions, A." (*TLE*) XXVI-2: 3. D85
- Schultz, Dennis. "With Devotion and a Willing Mind." (*TLE*) XXVII-1: 5-8. O86
- Schultz, Erhardt. "Day School Kids and The Other Kids." (*TLE*) XVIII-1: 5-7. O77
- Schulz, Arthur. "The Christian Teacher and the Curriculum." (*TLE*) IV-4: 15-16. My64
- Schulz, Arthur. "Intermediate Grade Child and His Teacher, The." (*TLE*) VIII-4: 8-11. My68
- Sellnow, David. "Making the Classroom into a Muckhole". XLIV-4: 125-128, M04. (TLE).
- Sellnow, David. E. T. -the Extra-Textual. XLVII-2: 35. D06. (TLE).
- Sievert, Erich. "Upper Grade Child and his Teacher, The." (*TLE*) VIII-4: 12-14. My68
- Sitz, Herbert. "And The Pope Doodles?" (*TLE*) VI-3: 12-13. F66
- Sorgatz, Edwin. "Christian Teacher and His Congregation." (*TLE*) IV-4: 4-6. My64
- Staab, William. "Ethics of the Lutheran Teacher (1)." (*TLE*) XX-3: 9-11. F80
- Staab, William. "Ethics of the Lutheran Teacher (2)." (*TLE*) XX-4: 10-13. My80
- Staab, William. "Ethics of the Lutheran Teacher (3)." (*TLE*) XXI-1: 14-16. O80
- Stern, Paul. "Teaching the Teacher." (*PCE*) II-1: 12-13. Su90
- Stoekli, Winfred. "Parent-Teacher Conferences." (*TLE*) I-2: 7-8. D60
- Tiefel, James. "Must Frustration Lead to Resignation?"

- (*TLE*) XXIX-1: 18-23. O88
- Timmel, K. "Inspiration Address: Wisconsin State Teachers' Conference." (*LSB*) VII-2: 1-2. D36
- Tullberg, Helen. "What a Sunday School Teacher Expects from Teachers Meetings." (*TLE*) II-2: 19-20. D61
- Tullberg, Paul + Olson. "Still Hungry!" (*TLE*) XXVII-1: 3-4. O86
- Wendland, David. "Reflections on My First Year". XLV-1:15-18. O04. (*TLE*).
- Wessel, Howard. "Oral Reading by the Teacher." (*TLE*) XIII-4: 14-15. My73
- Westendorf, S.E. "Commencement Address—DMLC." (*LSB*) XXIII-4: 1-2. My53
- Westendorf, Rolfe. "How do You Fix the Family?" (*LL*) VI-1:8-10 Fa97
- Willems, Paul. "Teacher Credentials." (*TLE*) XXVIII-3: 60-62. F88
- Willems, Paul. "Teachers as Learners." (*TLE*) XXXVI-2: 41-43 D95
- Willems, Paul. "Where's the Applause." (*TLE*) XXXVII-2: 60-64 D96
- Willems, Paul L. "Nekketsu Sensei." (*TLE*) XXXIII-2: 38-40. D92
- Willems, Paul. "Burnout Happens." (*TLE*). XL-2: 44-47 D99
- Willems, Paul. "Who Pushed You?" (*TLE*) XLIII-3: 124-125 My03.
- Willitz, Joel. "Summer Vacation is Near ... Rest." (*ELS*) I-3:1 Sp98
- Woldt, Alfons. "Dilemma of Being Normal." (*TLE*) XXIX-2: 28-32. D88
- Woltmann, William. "Teacher-Pupil Relations in the Intermediate Grades." (*TLE*) I-1: 6-7. O60
- Zehms, Elmer. "Teach Them Simply." (*TLE*) III-2: 13-14. D62
- Zehms, Roger. "Sunday School Teachers' Workshop: The Home-grown Variety." (*PCE*) III-1: 6-7. Su91
- Zimmerman, Donald. "My Diary." (*TLE*) XXVI-1: 20. O85
- Zimmermann, Doris. "The Primary Grade Child and His Teacher." (*TLE*) VIII-4: 6-7. My68

## Technology

- Aswege, Dawn. "Wired for Life." (LP) XI-1: 24 Sep/Oct 03.
- Hefti, R.W. "Rote, Writing, and Roads." (*TLE*) XLIII-3: 73-87 F03.
- Hintz, Michael. "Impressive Voice Mail Messages". XIII-1: 16-17 Fa04. (LL).

## Teenagers

- Carpenter, Craig. "How To Embarrass Your Kids." (LP) IX-1: 16 Sep/Oct 01
- Gurgel, Bart. "Raising Abel." (*TLE*) XLII-2:49-52 D01
- Teenagers

- Holman, James. "Never Used Teens." (LL) XI-1: 28-29 Fa02.
- Hermanson, Greg. "You're Forgiven." (LP) X-1: 30-31 Sep/Oct 02
- Kremer, Kenneth. "In Search of Family." (LP) IX-2: 14-15 Nov/Dec 01
- Pfeifer, Mike. "The Disappearing Generation." (LL) X:1 26-27 Fa01
- Reed, Linda Evenson. "Babel of Adolomics?" (LP) X-1: 4-5 Sep/Oct 02
- Wolle, Rhoda. "Teens: Sleep, Dreams, and Education." (*TLE*) XLII-3:91-92 F01

## Television

- Dougherty, Terri. "What Our Kids are Watching." (LP) IX-1: 12-13 Sep/Oct 01
- Isch, John. "Videotaping in a Classroom." (*TLE*) XLIII-2: 57-60 D02.

## Test Results

- Anonymous. "Our New Testing Program." (*TLE*) I-2: 24. D60
- Anonymous. "Test Results." (*TLE*) III-1: 23. O62
- Anonymous. "Test Results." (*TLE*) III-1: 23. O62
- Anonymous. "Test Results." (*TLE*) IV-1: 24. O63
- Anonymous. "Test Results." (*TLE*) IX-2: 24. D68
- Anonymous. "Test Results." (*TLE*) V-1: 24. O64
- Anonymous. "Test Results." (*TLE*) VI-1: 24. O65
- Anonymous. "Test Results." (*TLE*) X-1: 24. O69
- Anonymous. "Test Results." (*TLE*) XI-3: 24. F71
- Anonymous. "Test Results." (*TLE*) XI-4: 21. My71
- Anonymous. "Test Results." (*TLE*) XII-1: 20. O71
- Anonymous. "Test Results." (*TLE*) XIII-1: 13. O72
- Anonymous. "Test Results—Spring 1973." (*TLE*) XIV-1: 11. O73
- Anonymous. "Test Results." (*TLE*) XIX-1: 9. O78
- Anonymous. "Test Results." (*TLE*) XVII-2: 4. O76
- Anonymous. "Test Results." (*TLE*) XVIII-1: 4. O77
- Anonymous. "Test Results." (*TLE*) XX-1: 24. O79
- Anonymous. "Test Results." (*TLE*) XXI-1: 23. O80
- Anonymous. "Test Results." (*TLE*) XXII-1: 24. O81
- Anonymous. "Test Scores." (*TLE*) XXIII-2: 24. D82
- Anonymous. "Test Scores." (*TLE*) XXV-2: 21. D84
- Anonymous. "Test Scores—April 1985." (*TLE*) XXVI-1: 21. O85
- Anonymous. "Test Scores—April 1986." (*TLE*) XXVII-3: 17. F87
- Anonymous. "Test Scores 1987." (*TLE*) XXVIII-3: 57. F88

## Tests

- Albrecht, R.M. "Book Chat." (*LSB*) I-3: 4-5. n.d.31
- Anonymous. "Test Supplement: Book Report on 'The Christmas Carol'." (*LSB*) I-3: 6. n.d.31

- Anonymous. "Proposed Objective Test on Europe." (*LSB*) II-1: 8. S31
- Anonymous. "A Symposium." (*LSB*) VI-2: 3-4. D35
- Anonymous. "Is the IQ on the Way Out?" (*LSB*) XX-3: 6-7. F50
- Anonymous. "Report of the Committee on Testing." (*LSB*) XXX-4: 8. My60
- Averbeck, Julia. "What is the Value of Diagnostic Testing?" (*TLE*) XXXVI-1: 8-10 O95
- Averbeck, Robert. "Teacher-made Tests." (*TLE*) VIII-1: 8-9. O67
- Averbeck, Robert. "Reporting Test Results to Parents." (*TLE*) XII-1: 6-7. O71
- Bauer, Jackie. "Parents, School, and Standardized Tests." (*LP*) III-4: 7. Mar/Apr 96
- Bliefernicht, E.R. "Psychological Measurements (part 4)." (*LSB*) IX-1: 2-3. S38
- Bliefernicht, E.R. "Psychological Measurements (part 5)." (*LSB*) IX-3: 2-3. F39
- Bliefernicht, E.R. "Psychological Measurements (part 6)." (*LSB*) IX-4: 3-4. My39
- Bliefernicht, E.R. "Psychological Measurements (Part 1)." (*LSB*) VIII-1: 3-5. S37
- Bliefernicht, E.R. "Psychological Measurements (part 2)." (*LSB*) VIII-2: 3-5. S37
- Bliefernicht, E.R. "Psychological Measurements (part 3)." (*LSB*) VIII-4: 3-4. My38
- CPS. "Achievement Test Results." (*PL*) IV-1: 44 Fa95
- Ferch, Dawn. "Kindergarten Readiness Testing." (*TLE*) XXXVI-2: 36-40 D95
- Hanneman, Daryl. "Psychoeducational Evaluations." (*TLE*) XXXVII-1: 10-12 O96
- Hellermann, William. "Our Backward Pupil (1)." (*TLE*) XII-2: 10-11. D71
- Pelzl, David. "Authentic Assessment: Mathematics." (*TLE*) XXXIV-3: 86-89. F94
- Plath, LeDell. "Identifying, Nurturing, Developing." (*TLE*) XXI-3: 5-7. F81
- Rauschke, Armin. "Teacher-Constructed Achievement Tests (1)." (*LSB*) XXII-1: 5-7. O51
- Rauschke, Armin. "Teacher-Constructed Achievement Tests (2)." (*LSB*) XXII-2: 5-6. D51
- Sitz, Herbert. "How to Prepare Pupils for the State Examinations." (*LSB*) II-2: 3-5. N31
- Sitz, Herbert. "Super-Enthusiasm." (*LSB*) III-1: 4-5. O32
- Sitz, Herbert. "Care and Use of the New Type Objective Tests." (*LSB*) VI-2: 8. D35
- Sitz, Herbert. "The Intelligence Test Today." (*LSB*) XVII-4: 1-2. My47
- Trettin, Emil. "The Testing Program in Our Schools." (*LSB*) XXIII-2: 7-8. D52
- Trettin, Emil. "Testing Program Results 1951-52." (*LSB*) XXIV-4: 10-12. My54
- Trettin, Emil. "The Testing Program Results for 1953-1954." (*LSB*) XXV-3: 6. F55

- Trettin, Emil. "Our Synod-Wide Testing Program in Our Schools." (*LSB*) XXV-4: 8. My55
- Wendler, David. "Don't Put All Your Eggs in the Standardized Testing Basket." (*TLE*) XXXIII-4: 106-112. My93
- Wendler, David. "Authentic Assessment." (*TLE*) XXXIV-2: 51-54 D93
- Willems, Paul. "The Minnesota Graduation Standards." (*TLE*) XXXVII-4: 107-110 M97

## Textbooks

- Fischer, William. "Evaluating Religious Materials." (*TLE*) XIX-4: 5-7. My79
- Isch, John. "On the Selection of Textbooks." (*TLE*) XXVI-II-4: 89-92. My88
- Paap, Irma. "Effective Utilization of the Social Studies Text." (*TLE*) XII-1: 8-9. O71
- Wessel, Howard. "Selecting Materials for the Reading Program." (*TLE*) XXIII-2: 5-7. D82
- Wulff, Frederick. "A Good Social Studies Textbook." (*TLE*) XXXIV-1: 27-32 O93
- Wulff, Frederick. "Weaknesses in Social Studies Textbooks." (*TLE*) XXXIV-4: 121-128 My94

## Vacation Bible Schools

- Ahlswede, Eugene. "How About a Family Bible School." (*TLE*) XXIII-2: 11-13. D82
- Barber, John. "Planning a VBS Promotion." (*PL*) II-2: 28-29 Sp94
- Barber, John. "Planning a VBS Promotion." (*PCE*) II-3: 40-41. Wi90
- Boileau, Dave. "Who Would Have Dreamed ... ?" (*PL*) IV-3: 11-13 Su96
- Dorn, W.F. "I Like Vacation Bible School." (*TLE*) II-1: 15-16. O61
- Dowhen, Beth. "Vacation Bible School Crafts: Kits or Books." (*PCE*) II-4: 54-55. Sp91
- Fischer, William. "Effective Use of Our Part-Time Educational Agencies." (*TLE*) X-1: 14-16. O69
- Freeburn, Sharon. "Reaching Out through a Neighborhood VBS." (*PL*) II-2: 24-25, 29 Sp94
- Geiger, Gerald and Mark Mammel. "VBS Outreach—Evaluated and Revitalized." (*PCE*) III-3: 48. Wi91
- Herman, Edgar. "Five Will Get You Ten: Expanding the 5-day VBS to 10 Days." (*PCE*) I-4: 54. Sp90
- Janke, Martin. "Let's Put Away the Crayons!" (*TLE*) VII-2: 16-18. D66
- Kastens, Gerald. "Next Summer, Say Yes to Vacation Bible School." (*PL*) II-1: 32-33 Fa93
- Kruck, Keith. "Success and V.B.S." (*TLE*) X-4: 12-14. My70
- Krug, Gary. "Countdown: Planning Early." (*PCE*) I-3: 36-37. Wi89
- Lenz, Gregory. "Early Evening VBS." (*PCE*) I-4: 56-57.

Sp90

Mahnke, Jon. "VBS Plan Now! Enjoy It Later!" (*TLE*) XXVI-3: 6-9. F86

Nelson, Joel. "Christian Education During the Summer." (*PCE*) II-4: 58-59. Sp91

Rosenau, David L. "VBS Handicraft Coordinator." (*TLE*) XXVII-3: 8-9. F87

Schulz, Joel. "Soccer and Jesus." (*LI*) X-2: 8-10 Wi 2002

Spaude, Michael. "VBS Follow-up." (*PCE*) II-1: 8-9. Su90

Trapp, Thomas. "One Person." (*PL*) I-3: 37-38 Su93

## Values

Aderman, James. "Hooked on Porn." (*LP*) V-1:10-11 Sep/Oct 1997

Aderman, James. "Have the Talk." (*LP*) XI-4: 4-8 Mar/Apr04.

Ahlswede, Eugene. "I Don't Laugh at Drunks Any More." (*TLE*) XXV-4: 9-10. My85

Ahlswede, Eugene. "Garbage In—Garbage Out." (*TLE*) XXVI-3: 14-15. F86

Anonymous. "Teaching Christian Attitudes Toward Sex." (*TLE*) X-2: 10-11. D69

Bode, Douglas. "Celebrate Life." (*LP*) XI-2: 6-8 Nov/Dec 03.

Buelow, Ronald. "Equal Rights?" (*TLE*) XVI-2: 23-24. D75

Czer, Ramona. "Words Matter." (*LP*) VI-1: 6-8

Ehlke, Lorna. "What About Santa?" (*TLE*) XXIV-2: 17-19. D83

Fleischmann, Robert. "Still Here for a Reason." (*LP*) V-3:14-15 Jan/Feb 1998

Gerlach, Joel. "The Myth of a Value-Free System." (*TLE*) IX-1: 2-4. O68

Gerlach, Joel. "Abigail and Hector." (*TLE*) XVI-3: 5-6. F76

Greenfield, Sandra. "Tales of Tatting and Blaming." (*TLE*) XXV-3: 9-11. F85

Hackbarth, Herbert. "The Comic Book Problem and How We Cope With It." (*LSB*) XX-3: 4-6. F50

Hagedorn, Grace. "The First Word." (*TLE*) XXIII-2: 18-20. D82

Hochmuth, Robert. "Value Clarification Through Moral Dilemma." (*TLE*) XIX-3: 2-4. F79

Hochmuth, Robert. "The Other End of the Open End." (*TLE*) XVIII-3: 2-4. F78

Hochmuth, Robert. "In the Margin." (*TLE*) XX-4: 2-4. My80

Huebner, Lloyd. "The State, Christianity, Spiritual Values." (*TLE*) IX-1: 12-14. O68

Juern, John. "Time for Sex Ed in the Home." (*LP*) XI-4: 23 Mar/Apr04.

Kassulke, Paul. "Lutherans for Life—Lutherans for Love." (*TLE*) XXVI-4: 8-10. My86

Kremer, Kenneth. "Survival Quarter (part 2)." (*TLE*) XXV-2: 12-16. D84

Krug, Gary. "A Christian Look at Rock (1)." (*TLE*) XXVI-1:

2-5. O85

Krug, Gary. "A Christian Look at Rock (2)." (*TLE*) XXVI-2: 11-13. D85

Krug, Gary. "A Christian Look at Rock (3)." (*TLE*) XXVI-3: 2-6. F86

Krug, Gary. "A Christian Look at Rock (4)." (*TLE*) XXVI-4: 1-4. My86

Lawrenz, Carl. "Dangers ...Introducing Religious Instruction in Pub Schools(1)." (*LSB*) XVI-3: 1-2. F46

Lawrenz, Carl. "Dangers ...Introducing Religious Instruction in Pub Schools(2)." (*LSB*) XVI-4: 1-2. My46

Lenz, Mark. "Tertullian, Gregory, and Fundamentalism." (*TLE*) XXXVI-2: 35 D95

Meyer, F.W. "Today's Youth Problem Calls for Sound Christian Judgment." (*LSB*) XV-3: 3-4. F45

Norwine, Jim. "Are Our Students' Values 'Postmodern'?" XLVII-4: 102-111. M07. (*TLE*).

Oswald, Kurt. "Are We Supervising Our Children's Radio Listening Programs?" (*LSB*) XIII-4: 3-4. My43

Ponath, Ann. "Wonderfully Different." (*LP*) XI-4: 24 Mar/Apr04.

Pape, Ronald. "Take Your Choice." (*TLE*) VI-1: 4-5. O65

Petermann, James. "Back to the Basics." (*TLE*) XXIV-2: 10-12. D83

Raasch, Robert. "Let Your Light Shine." (*LP*) XI-3: 28-29 Jan/Feb04.

Schmal, Mary. "When Time Runs Out." (*LP*) XI-5: 4-5 May/Jun04.

Schmeling, Daniel. "Absolutes? Absolutely!" (*TLE*) XXII-1: 15-17. O81

Smith, Kristen. "Pornography: Challenge for a Growing Conscience" (*LP*) IX-2: 6-8 Nov/Dec 01

Starr, Laurie. "Taking the Treasure Hunt." (*LP*) XI-5: 24 May/Jun04.

Stellwagen, L. "Prominent Educators: Rousseau." (*LSB*) XVI-3: 3-6. F46

Uhlig, Ruth. "The Role of Santa Claus in the Christian Day School." (*LSB*) XX-1: 5-7. O49

## Women

Anonymous. "Installation or Induction of Women Teachers." (*TLE*) VIII-2: 19. D67

Anonymous. "Guidelines for Participating in Social Security by Women Teachers." (*TLE*) XI-2: 21. D70

Anonymous. "Women Teacher Consultants." (*TLE*) XIV-1: 9-11. O73

Baumler, Gary. "More Than Kaffeeklatsching." (*TLE*) XVI-1: 18-20. O75

Conference of Presidents. "Installation of Women Teachers." (*TLE*) IV-2: 22. D63

Deltgen, Gail L. "A Contemporary Form of Old Maid." (*TLE*) XXXIII-2: 49-51. D92

Fellers, Debera. "New Direction for Women's Groups." (*PL*)

II-3: 19,25 Su94

Gawrisch, Wilbert. "What About Women Visitors?" (*TLE*) VII-1: 2-6. O66

Kehl, Dave. "Involving Women". XIII-1: 20-21 Fa04. (LL)

Wendland, Kathie. "Trends for Women." (LL) XI-3: 22-23 Sp03.

## World

Ahlswede, Eugene. "Humanist Manifesto II." (*TLE*) XXVI-2: 8-9. D85

Bilitz, Jonathan. "Bombs, Guns, Fists, Tongues." (LP) X-4: 6-8 Ma/Ap 03.

Braun, John. "Blessed: An Interview with Victor Manian." (LL) XII-2: 18-19 Wi04.

Diener, James. "Outside the Box." (LL) XII-2: 26-27 Wi04.

Fredrich, Edward. "Recognizing Conflict Between Christian Education. and the World's Philosophy of Education." (*TLE*) XIV-2: 4-6. D73

Gourley, Myrtle. "A Mother's Report on Comic Books." (*LSB*) XXVI-1: 3. O55

Hackbarth, Herbert. "The Comic Book Problem and How We Cope With It." (*LSB*) XX-3: 4-6. F50

Hochmuth, Robert. "Consider the Alternatives." (*TLE*) IX-3: 5-6. F69

Hochmuth, Robert. "Fading World-Unfading Glory." (*TLE*) XIX-2: 2-4. D78

Isch, John. "Shopping in the World's Marketplace." (*TLE*) XXXI-3: 58-62. F91

Kehl, Leslie. "Recognizing the Influence of Modern Trends on Child's Character." (*LSB*) XXV-1: 4-8. O54

Klatt, H.R. "Seeking the Major Premise Through the Ages." (*TLE*) III-3: 17-18. F63

Klatt, H.R. "Educational Changes in our Present Changing World." (*LSB*) VIII-3: 2-5. F37

Klatt, H.R. "Be Not Conformed to This World." (*LSB*) X-2: 2-3. D39

Klatt, H.R. "Be Not Conformed to this World in Teaching the Social Studies." (*LSB*) X-3: 2-3. F40

Klatt, H.R. "An Appraisal of Educational Principles in the Light of Scrip." (*LSB*) XIV-4: 2-4. My44

Klatt, H.R. "An Evaluation of the World's Philosophy of Education." (*LSB*) XVIII-4: 5-6. My48

Kremer, Kenneth. "Signs of the Times." (*TLE*) XLIII-1: 11-15 O02.

Olson, Lawrence. "Culture War on the Home Front." (LP) VI-3: 12-14 Jan/Feb 99

Oswald, Kurt. "Are We Supervising Our Children's Radio Listening Programs?" (*LSB*) XIII-4: 3-4. My43

Rohda, Dudley. "My Kingdom is Not of This World." (*LSB*) XXIV-1: 1-4. O53

Radatz, Darwin. "An Encouragement to Volunteer for Community Service". XLV-1:26-31. O04. (TLE).

Schaller, Egbert. "The Spectre of Post-war Dangers Confronting Our Christian Education." (*LSB*) XVI-1:

1-2. O45

Sitz, Herbert. "Values of the CDS in Preparing the Pupil For His Place in the Community." (*LSB*) VIII-1: 1-3. S37

Smith, Kristen. "The Subtle Seductive Power of TV." (LP). VIII-5:4-6 May/Jun01

Starr, Laurie. "Pink, Blue, or Androgyny." (LP) VI-1: 14 Sep/Oct98

Stoekli, Winfred. "Training Children to Apply Christian Principles in Social Life." (*LSB*) XXIV-1: 12-14. O53

Wallander, Laura. "Moms Working It Out." (LP). VIII-2: 10-11 Nov/Dec00

Wendland, Paul O. "Gospel Freedom and Contemporary Music (1)." (*TLE*) XXXIII-2: 56-62. D92

Wendland, Paul O. "Gospel Freedom and Contemporary Music (3)." (*TLE*) XXXIII-3: 68-71. F93

Wendland, Paul O. "Gospel Freedom and Contemporary Music (3)." (*TLE*) XXXIII-4: 100-105. My93

Wichmann, W.F. "How Our Children May See Evil of Boy Scout Through Catechism." (*LSB*) XXIV-4: 3-6. My4

Woldt, Alfons. "Dilemma of Being Normal." (*TLE*) XXIX-2: 28-32. D88

Zermuehlen, Mrs. Oscar. "Developing a Christian Attitude Toward Holidays." (*LSB*) XXX-1: 6-7. O59

## Worship

Aderman, James. "Shout for Joy and Sing." (*TLE*) XXI-1: 24. O80

Ahlswede, Eugene. "Sing, Christian, Sing." (*TLE*) XXVII-3: 1-2. F87

Albrecht, Martin. "Do You Appreciate and Understand Your Church Service?" (*TLE*) VII-3: 16-18. F67

Albrecht, Martin. "Challenge to the Church Organist." (*TLE*) X-3: 19-21. F70

Albrecht, Martin. "Matins and Vespers." (*TLE*) XI-1: 21-23. O70

Albrecht, Martin. "Should Our Worship Service Remain As It Is?" (*TLE*) XII-3: 20-22. F72

Albrecht, Martin. "TACT." (*TLE*) XIII-3: 22-24. F73

Albrecht, Martin. "Musical Instruments in the Church." (*TLE*) XIV-2: 20-22. D73

Anonymous. "The Advent Wreath." (PL) I-3: 20-21 Su93

Backer, Bruce. "Organ Music For the Distribution." (*TLE*) I-2: 17-20. D60

Backer, Bruce. "O Come, Let Us Sing Unto the Lord." (*TLE*) I-4: 18-19. D61

Balge, Richard. "The Sermon Is a Cooperative Effort." (PL) I-2: 12. Sp93

Bartel, Fred. "Music Ideas for Christmas Eve." (*TLE*) XX-1: 19-21. O79

Becker, James P. "Display Your Diamond." (*TLE*) XXXIII-2: 43-48. D92

Bergenthal, Guy. "Study the Sacraments." (LL). VIII-1: 22-23 Fa99

- Bode, Steve. "Introducing the Lutheran Hymnal ca 1941." (PL) II-1: 4-5,9 Fa93
- Braun, John. "Life Is an Act of Worship." (LL)V-3:14-17 Sp97
- Braun, Mark. "Stated Aim: To Worship What we Know, A." (TLE) XXI-2: 5-7. D80
- Brug, John. "Approaching a Majestic God." (PL) I-1: 25-26. N92
- Cortright, Charles. "Some Practical Advice about Pastoral Chanting." (PL) I-3: 17-18 Su93
- Cortright, Charles. "No Apology Needed." (LL)VI-1:22-23 Fa97
- Danner, Lauren. "A Christmas Eve Service in a Small Sunday School." (PCE) III-2: 30-31. Fa91
- Esmeier, James. "Making Worship Accessible to Everyone." (LL)V-3:22-23 Sp97
- Falck, Karla. "Teaching the Trinity in the Primary Grades." (TLE) IX-3: 7-8. F69
- Flunker, Charles. "Ascension Day Sermon By Children." (TLE) VII-3: 8-9. F67
- Franzmann, Werner. "An Order of Service for a Conference of Pastors/Teachers." (TLE) XXVII-2: 18-21. D86
- Gerlach, Bryan. "Communicating Baptism's Power." (PL) I-2: 15-16 Sp93
- Gerlach, Bryan. "Timpani for the Asking." (PL) II-2: 38 Sp94
- Gerlach, Bryan. "Choral Stewardship? Try a Motet Choir." (PL) III-1: 16-17 Fa94
- Gerlach, Bryan. "Ten Unexpected Years." (PL) IV-3: 30-31 Su96
- Gerlach, Bryan. "Questions About Christian Worship (2)." (PL) IV-3: 33-34 Su96
- Gerlach, Bryan. "Worship Renewal." (LL)V-3:4-7 Sp97
- Gerlach, Bryan. "Worship Variety and Vitality." (LL) X:1 22-23 Fa01
- Gerlach, Brian. "Musical Colors for Worship." (LL) XII-4: 22-23 Su04.
- Gerlach, Bryan. "Comfrotable or Compelling." (LL) XII-1: 26-27 Fa03.
- Gerlach, Joel. "Two-Dimensional." (LL). VII-4: 18-19 Su99
- Grabitske, Patricia. "Prayer for Our Christian Teachers." (TLE). XLI-1: 4-5 O00
- Gurath, Beverly. "Good Friday Children's Services." (TLE) XX-2: 22-23. D79
- Hartwig, Theodore. "Again, Anent Worship." (TLE) XIII-1: 12-13. O72
- Heinitz, Brian. "Worship Leaders are Educators." (LL) X-4:22-23 Su02
- Hochmuth, Carl. "Worshipping with Children's Messages." (LL)V-3:20-21 Sp97
- Holman, Cindi. "Young Worshipers." (PL) IV-3: 26-27 Su96
- Huebner, James. "Welcoming Guests at Worship." (LL) V-3:26-27 Sp97
- Kaiser, Ruth. "Spread the Good News." (TLE) XXIV-3: 7-8. F84
- Klball, Gary. "The Worship Card—A User-Friendly Worship Guide." (PL) III-1: 12-13 Fa94
- Knippel, Robert. "Caution: Worship May be Habit-forming." (LP)V-2:6-7 Nov/Dec 1997
- Koelpin, John. "Strong Worship." (PL) IV-3: 32 Su96
- Kolander, Jonathan. "Everyone Welcome." (LL) XI-2: 22-23 Wi03.
- Krause, Richard. "Lutheran Lite?" (LL). VIII-1: 8-10 Fa99
- Kresnicka, Judith. "Instruments in the Worship Service." (TLE) XVII-2: 16-18. D76
- Krueger, Robert. "Investing in Worship." (LL). IX-3:22-23 Sp01
- Kuske, David. "A Bible Study on New Worship Forms." (PL) I-3: 15-16 Su93
- Magiera, Corrine. "Sh, We're in Church!" (LP). VII-2: 14-15 Nov/Dec 99
- Marowsky, Lawrencsh, "Service Playing: Funerals." (TLE) XVII-3: 19-20. F77
- Mattek, John. "Involve Youth in the Worship Service." (PL) I-3: 39 Su93
- Meyer, Edward. "Quotations from Twenty-Five Years of TLE Music Articles." (TLE) XXV-4: 12-15. My85
- Muetzel, Ronald. "Celebrate Real Presence." (LL). VIII-1: 4-7 Fa99
- Nitz, Joel. "Build for Worship." (LL) VI-6:24-25 Su98
- Olson, Lawrence. "Outreach Insights: Evangelism and Music." (PL) II-1: 14-15 Fa93
- Otto, Joel. "Zing in Our Singing". XIII-1: 26-27Fa04. (LL).
- Pankow, Richard. "A Little is Better Than Nothing." (PCE) III-1: 14-15. Su91
- Prahl, Herbert. "New Hymnal Dedictory." (PL) II-2: 36 Sp94
- Prange, Joel. "A Palm Sunday Alternative." (TLE) XXVIII-2: 31-32. D87
- Prange, Paul. "Worship Christ, the Truth." (LL) VI-6:28-29 Su98
- Prillwitz, David. "Worship in Small Parishes." (LL). VIII-4: 20-21 Su2000
- Rebers, Dan. "Study to Worship." (LL)V-3:18-19 Sp97
- Riege, Irene. "Sign-Interpreted Services." (LL). VII-3: 18-19 Sp99
- Ring, Alex. "Advent: A Time of Preparation." (ELS). VI 1,8 Fa99
- Ruddat, Rachel. "Worship at Manitowoc Lutheran High School." (PL) II-1: 25-26 Fa93
- Schaefer, James. "Christian Worship and the Common Man." (PL) II-1: 10 Fa93
- Schleusener, Beth. "Celebrate the Faith." (LL). VIII-3: 28-29 Sp00
- Schulz, James. "Variety for Worship." (LL)VI-3:8-10 Sp98
- Schultz, Tony. "God's Great Sense of Humor." (LP) III-2: 6-7. Nov/Dec 95
- Schulz, Wayne. "Worship and Outreach: Partners in Life." (PL) I-2: 37,39 Sp93
- Schulz, Wayne. "Worship and Outreach: Partners in Life (2)." (PL) I-3: 48-49 Su93

- Schroeder, Jonathan. "Worship That Treasures Every Soul". XIII-2 18-19 Wi05. (LL).
- Shilling, Ronald. "Service Playing: Accompanying the Choir and Soloist." (TLE) XVI-4: 17-19. My76
- Schultz, Thomas. "Communion on Festivals." (LL). VIII-1: 20-21 Fa99
- Schulz, Anthony. "The Cry Room." (LP) VI-3: 5 Jan/Feb 99
- Schulz, James. "Rite Things for the Right Reasons." (LP). VIII-2: 5 Nov/Dec00
- Sitz, Herbert. "Mild Dissent, A." (TLE) XII-4: 13-14. My72
- Sordahl, Peter. "Worship Committee Benefits." (LL) IX-4:26-27 Su01
- Tackmier, Bill. "Emphasize Baptism." (LL). VIII-1: 18-19 Fa99
- Tiefel, James. "The Liturgical Style of Lutheran Worship." (PL) I-2: 13-14 Sp93
- Tiefel, James. "Unity in Our Worship Life." (PL) II-1: 6-7 Fa93
- Tiefel, James. "Cautious Optimism about Christian Worship." (PL) II-1: 8-9 Fa93
- Tiefel, James. "The Altar and Its Use." (PL) III-1: 14-15 Fa94
- Tiefel, James. "Sing the Verse of the Day!" (PL) III-2: 35-36 Sp95
- Tiefel, James. "Worship and Evangelism: Strive for a Warm and Caring Atmosphere." (PL) III-3: 17-18 Su95
- Tiefel, James. "Why Have a National Worship Conference?" (PL) IV-2: 50-51 Sp96
- Tiegel, James. "Setting Objectives for Worship." (PL) I-1: 27-28. N92
- Tiefel, James. "Come Worship Christ." (LL)V-3:8-10 Sp97
- Tiefel, James. "Worship's Top Ten." (LL) XI-3: 18-19 Sp03.
- Voss, Verne. "Tincture of Pharisee and other Nagging Maladies." (LP) IX-4: 8-9 Ma/Ap 02
- Wagner, Wayne. "A Children's Ascension Day Service." (PCE) I-4: 60-61. Sp90
- Wagner, Wayne. "Handbells in Our Churches and Schools." (TLE) XX-2: 17-19. D79
- Wenzel, Kenneth. "Children's Christmas Eve Service Outline." (TLE) XXVI-1: 8-10. O85
- Westendorf, Rolfe. "Ars Pro Artis?" (TLE) XXV-3: 15. F85
- Zabell, Jon. "Worship Over Already?" (LL) XI-2: 24-25 Wi03.

## Writing

- Anonymous. "Composition: A Boon, Not a Burden." (TLE) XI-3: 15-17. F71
- Averbeck, Robert. "Aids to Creative Writing." (TLE) XII-3: 6-7. F72
- Averbeck, Robert. "Take Time for Writing." (TLE) XVII-3: 12-13. F77
- Baer, Eugene. "In Response to: 'But This Isn't English Class'." (TLE) XXV-3: 11-12. F85
- Baer, Eugene + Tech. "Communication: A Basic Skill." (TLE) XVIII-3: 14-16. F78

- Baumler, Gary. "Christians in Crisis." (PL) I-3: 42 Su93
- Czer, Larry. "Education 599: Writing Across the Curriculum." (TLE) XXX-3: 52-55. F90
- Czer, Ramona. "Notebooks of Discovery." (TLE) XXXVI-3: 79-81 F96
- Czer, Ramona. "A Work in Progress." (TLE). XL-1: 28-30 O99
- Czer, Ramona. "Beached Grounded--Send Help." (TLE). XLI-2: 60-63 D00
- Czer, Ramona. "Essaying Into Drafts." (TLE). XLI-4: 124-128 My01
- Czer, Ramona. "Naming Airy Nothings." (TLE). XLI-1: 30-31 O00
- Czer, Ramona. We Are the Music Makers. (TLE). XLI-3: 70-76 F01
- Czer, Ramona. "Wintering in Our Summer Notebooks: Part I-Wholeness and the Christian Teacher". XLVI-3: 80-91. F06. (TLE).
- Ehlke, Lorna. "Penciled By Young Writers." (TLE) XXIV-1: 20-21. O83
- Ehlke, Lorna. "Poetic Primaries." (TLE) XXV-4: 15-17. My85
- Franzmann, Werner. "Yeah, We Done Two Themes In Our Senior Year." (TLE) III-4: 20-21. My63
- Heidtke, Doris. "Newsflash." (TLE) XI-3: 9-10. F71
- Kremer, Kenneth. "Afterthoughts to a Career of Teaching Composition." (TLE). XL-1: 18-20 O99
- Kremer, Kenneth. "The Writing Teacher". XLV-2: 41-47. D04. (TLE).
- Larsen, Elizabeth. "Adding a Floor to the Bird House: A Model for ... Composition." (TLE) XXI-2: 17-20. D80
- Neuman, Jane. "Early Childhood Writing Experiences." (TLE) XXXV-3: 83-85 F95
- Ohlendorf, Rachel. "Upheaval and the process of Poetry." (TLE). XLI-4: 122-123 My01
- Pape, Gordon. "Promoting Creative Writing." (TLE) IX-1: 10-11. O68
- Price, Jame. "Comparing Two Methods of Instruction: Traditional Grammar and the Writing Workshop (2)." (TLE) XXXIX-4: 100-109 M99
- Price, Jame. "Comparing Two Methods of Instruction: Traditional Grammar and the Writing Workshop (1)." (TLE) XXXIX-3: 80-85 F99
- Schmal, Mary. "Writing Equals Thinking." (LP) X-3: 30-31 Ja/Fe 03.
- Schmeling, Daniel. "Sing (and Write) Unto Him a New Song." (TLE) XIX-1: 10-12. O78
- Schroeder, Martin. "The Reading-Writing Connection: Something New?" (TLE) XXXIII-3: 67. F93
- Schultz, Dennis. "Antidisestablishmentarianism—by Coincidence." (TLE) XXVI-2: 15-16. D85
- Spaude, Naomi. "Speak, Read, Write." (TLE) XVII-1: 7-8. O76
- Tech, Norman + Baer. "Communication: A Basic Skill." (TLE) XVIII-3: 14-16. F78

- Willems, Paul. "Why Write?" . XLIV-3: 79-80 F04. (TLE).  
 Witte, Dale. "The Church Musician—Nurturing the  
 Congregation." (LL)VI-2:28-29 Wi98  
 Zimmerman, Donald. "My Diary." (TLE) XXVI-1: 20. O85

## Youth

- Aderman, James. "Self-Talk About Drug-Talk." (LP) VI-4: 5f  
 March/April99  
 Anonymous. "More About Youth Groups." (TLE) IX-2: 17-  
 20. D68  
 Arndt, Dallas. "Listen, Learn, and Leader." (LL) VI-6: 18-19  
 Su98  
 Bauer, Jackie. "A Proactive Approach." (LP) VI-4: 9  
 March/April99  
 Bondow, Susan. "Starving for Perfection." (LP) III-4: 12-13.  
 Mar/Apr 96  
 Burger, Norman. "Who Am I?" (LL). VIII-1: 26-27 Fa99  
 Carpenter, Craig. "Why 14-year olds should drive." (LP)IV-  
 6:16 July/August 1997  
 Carpenter, Craig. "The Question." (LP) VI-4: 16  
 March/April99  
 Carpenter, Craig. "A Clearn Start." (LP). VI-6: 16 Ju/Au99  
 Carpenter, Craig. "Humility." (LP). VII-2: 16 Nov/Dec99  
 Chworowsky, John. "Youth Groups—Whither and How?"  
 (TLE) VI-4: 19-20. My66  
 Cook, John. "With Your Eyes Open." (LP) VI-4: 14-15  
 March/April99  
 Doebler, Matthew. "Cut Off Mickey's Ear." (LL) XI-3: 20-21  
 Sp03.  
 Fenske, R.A. "This I Did for You; What Will You do For  
 Me?" (LSB) X-3: 1-2. F40  
 Freier, Mark. "The Vital Ingredient." (PL) III-1: 46-47 Fa94  
 Gulczynski, D. Dennis. "Youth Leaders as First-Level  
 Counselors." (PL) IV-2: 41 Sp96  
 Holman, James. "Service with a Smile?" (PL) IV-3: 17-18  
 Su96  
 Holman, Jams. "Listen to Me. I'm Talking to You." (PL) IV-  
 2: 42-43 Sp96  
 Janke, Philip. "Troubles With Our Youth Groups?" (TLE)  
 IX-1: 15-18. O68  
 Johnson, John. "What Loving Youth Is Really All About."  
 (PL) III-2: 19-20 Sp95  
 Juern, John. "Teach Them to Say No." (LP) VI-4: 4  
 March/April99  
 Kastens, Gerald. "A Family-Centered Approach in Ministry  
 to Youth and Children." (PL) I-1: 17-18. N92  
 Kastens, Gerald. "WELS Kids Connection: Video Link to  
 Kids." (PL) III-3: 48-49 Su95  
 Kastens, Gerald. "Retaining Our Youth." (TLE) XXXIX-1:  
 15-19 O98  
 Kelm, Paul. "Don't Babysit Your Youth Group." (TLE)  
 XVI-4: 14-16. My76  
 Klusmeyer, Tom. "Strengthening Faith at Summer Camp."  
 (PL) II-1: 37-38 Fa93  
 Krueger, David. "Youth Rally—Worthwhile of Worthless?  
 The." (TLE) XVIII-4: 5-7. My78  
 Krug, Gary. "Christian Look at Rock, A (1)." (TLE) XXVI-  
 1: 2-5. O85  
 Krug, Gary. "Christian Look at Rock, A (2)." (TLE) XXVI-  
 2: 11-13. D85  
 Krug, Gary. "Christian Look at Rock, A (3)." (TLE) XXVI-  
 3: 2-6. F86  
 Krug, Gary. "Christian Look at Rock, A (4)." (TLE) XXVI-  
 4: 1-4. My86  
 LaGrow, George. "Managing a Teen Bible Class." (PL) II-3:  
 42-44 Su94  
 Lawrenz, John. "Youth Ministry in 4-D." (TLE) XVI-3: 17-  
 19. F76  
 Lehmann, Richard. "A Few Thoughts on Youth Ministry."  
 (TLE) XXIV-1: 13-16. O83  
 Malnes, Dave. "Small-Parish Youth Ministry." (LL). VIII-4:  
 28-29 Su2000  
 Mattek, John. "Involve Youth in the Worship Service." (PL)  
 I-3: 39 Su93  
 Meyer, Edward. "Development of the Adolescent Male's  
 Singing Voice." (TLE) XVIII-2: 17-19. D77  
 Meyer, F.W. "Today's Youth Problem Calls for Sound  
 Christian Judgment." (LSB) XV-3: 3-4. F45  
 Mundt, William. "So You're the Youth Director! Now  
 What?" (TLE) XIX-1: 7-9. O78  
 Nelson, Jason. "Confidentiality in Youth Ministry." (PL) IV-  
 3: 15-16 Su96  
 Nelson, Jason. "When You Turn Out the Lights, Is the Part-  
 ty Over?" (LP) VI-4: 6-7 March/April99  
 Nelson, Joel. "Retention or Advancement." (LL) XI-2: 8-10  
 Wi03.  
 Nelson, Joel. "Responding to Why Youth Leave WELS".  
 XLVII-2: 51-59. D06. (TLE).  
 Ninman, Nancy. "A Broken Trust." (LP) VI-4: 12-13  
 March/April99  
 Parlow, John. "How to Involve Parents in Youth Ministry."  
 (PL) III-1: 48-50 Fa94  
 Parlow, John. "Involving Teens in Worship." (LL)V-3:24-25  
 Sp97  
 Payne, David. "Seven Tips for Better Discussions." (PL) I-2:  
 27-28 Sp93  
 Pfeifer, Michael. "Can We Stop the Bleeding?" (LP) XXXIX-  
 4: 110-114 M99  
 Ponath, Ann. "On Being Big." (LP) X-4: 30 Ma/Ap 03.  
 Raasch, Charles. "Training Youth to Lead." (LL) X-4:28-29  
 Su02  
 Raether, Dale. "You Want Money for What?!" (PL) I-1: 19-  
 20. N92  
 Ristow, Leroy. "Home, High School, and Country." (TLE)  
 VI-4: 16-18. My66  
 Rost, Martin and Denise Luehmann. "Twice the Joy of  
 Christian Service." (LL)V-2:4-7 Wi97  
 Saar, Ernest W. A. "Effective Youth Ministry." (TLE)  
 XVIII-3: 5-7. F78

- Schaller, Loren. "Adolescent, His Pastor and Christian Teachers." (*TLE*) VIII-4: 15-17. My68
- Scheibe, Jeff. "Our Mission to Youth." (*LL*). VII-4: 20-21 Su99
- Staab, William. "After High School — Then What?" (*TLE*) XXII-4: 8-10. My82
- Stadler, Richard. "Jesus and Socrates in the Youth Program?" (*TLE*) XXI-1: 5-7. O80
- Wasser, Robert and Bonnie. "The Devil is Prowling." (*ELS*) VI-4: 10-11 March/April99
- Westendorf, W. W. "Post-Confirmation Instruction." (*TLE*) III-3: 15-16. F63
- Winters, Richard. "Connecting a youth Rally to the Congregation." (*PL*) IV-2: 44 Sp96
- Zahn, Al. "Driving in Circles? Developing a Map for Youth Ministry." (*PL*) I-2: 25-26 Sp93
- Ziesemer, Richard. "Part-time Agency for Collegiates." (*TLE*) XV-2: 19-20. D74
- Zink, Robert. "Bible Class—The Best Way to Serve the Young People of Our Congregations." (*TLE*) XII-2: 17-19. D71
